# Supplementary material for: HySA: a Hybrid Structural variant Assembly approach using next-generation and single-molecule sequencing technologies
Source: PubMed Central journal article supplement — Genome Res. 2017 May;27(5):793–800. doi: 10.1101/gr.214767.116 (PMC5411774; doi:10.1101/gr.214767.116), 2017-05
Supplement: supp_gr.214767.116_Supplemental_Fig_S1.pdf [file supp_gr.214767.116_Supplemental_Fig_S1.pdf]

(a)

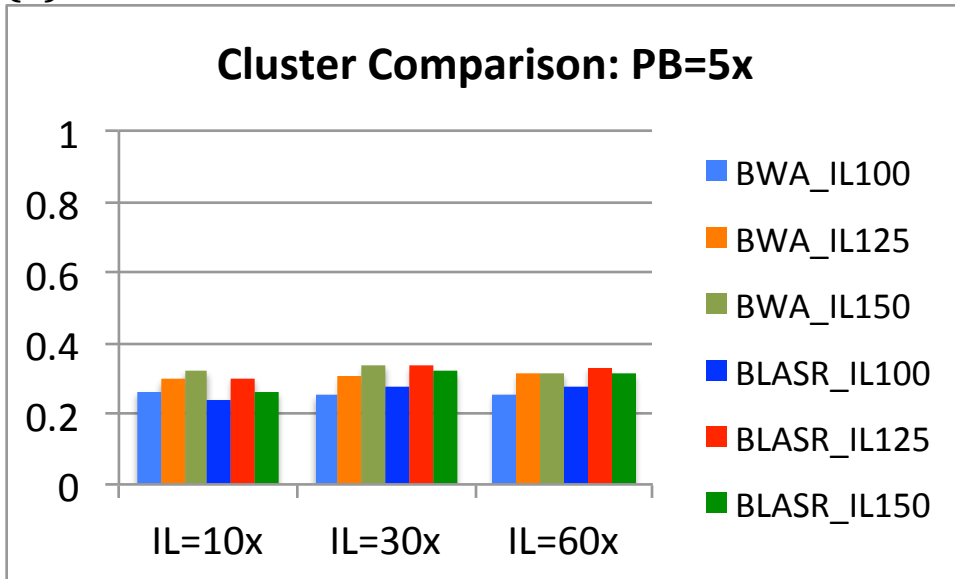

(b)

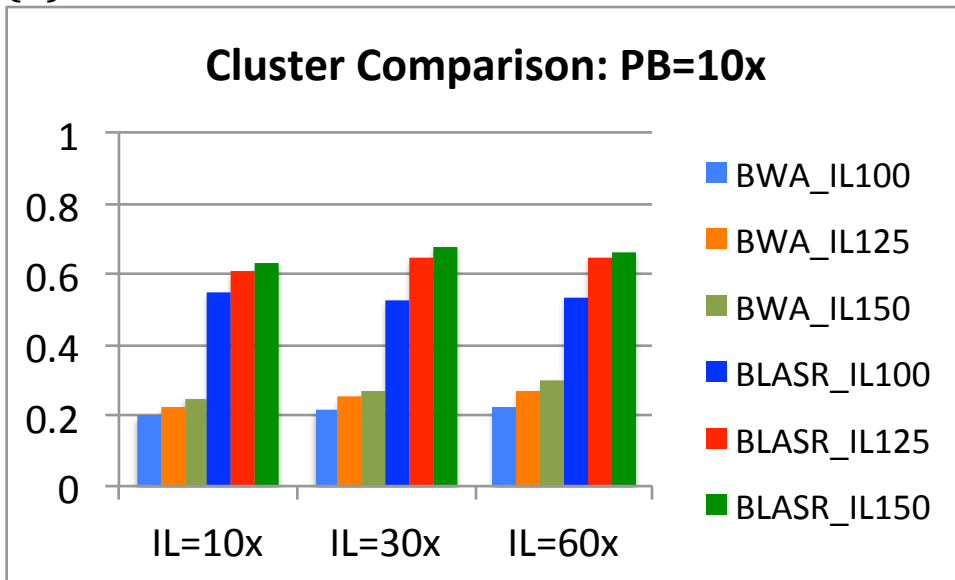

(c)

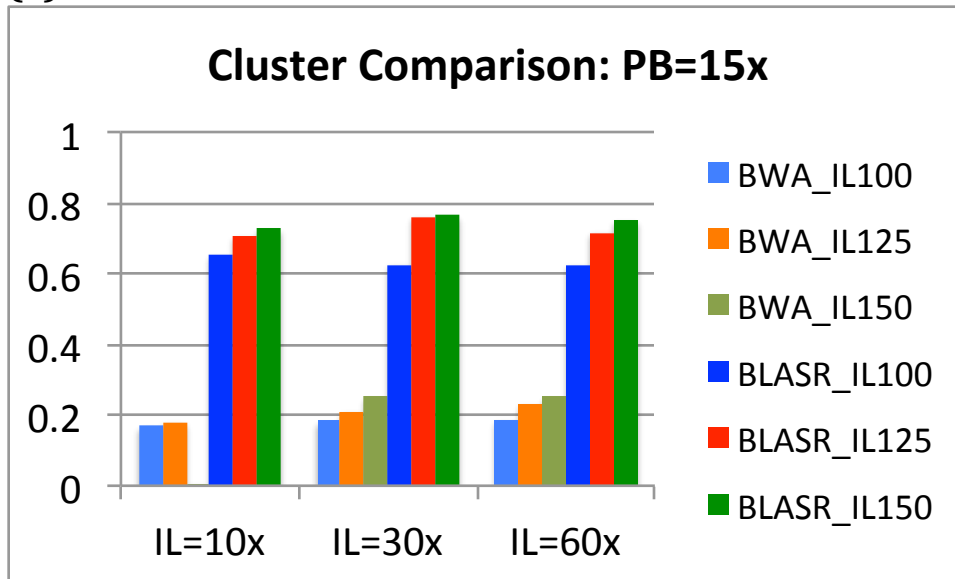

(d)

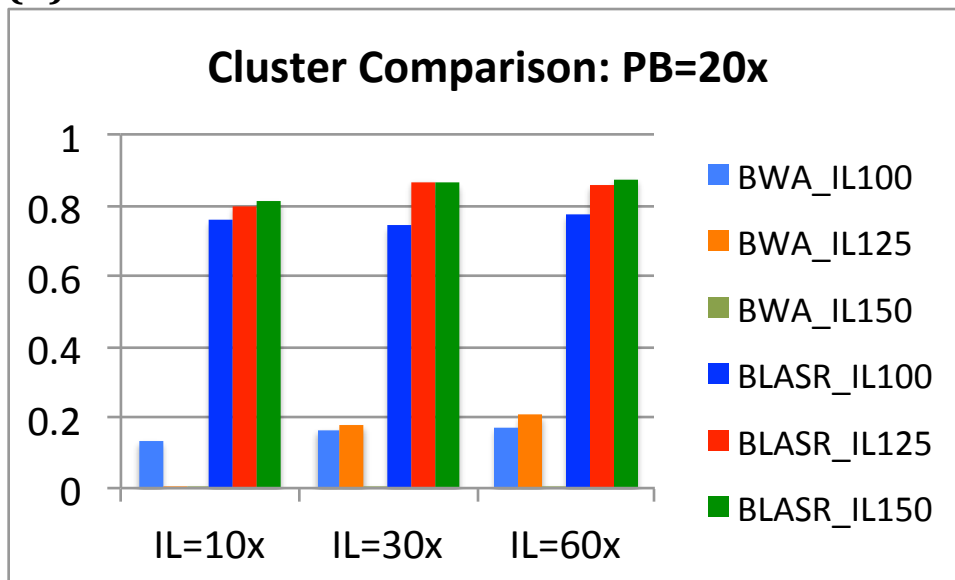

(e)

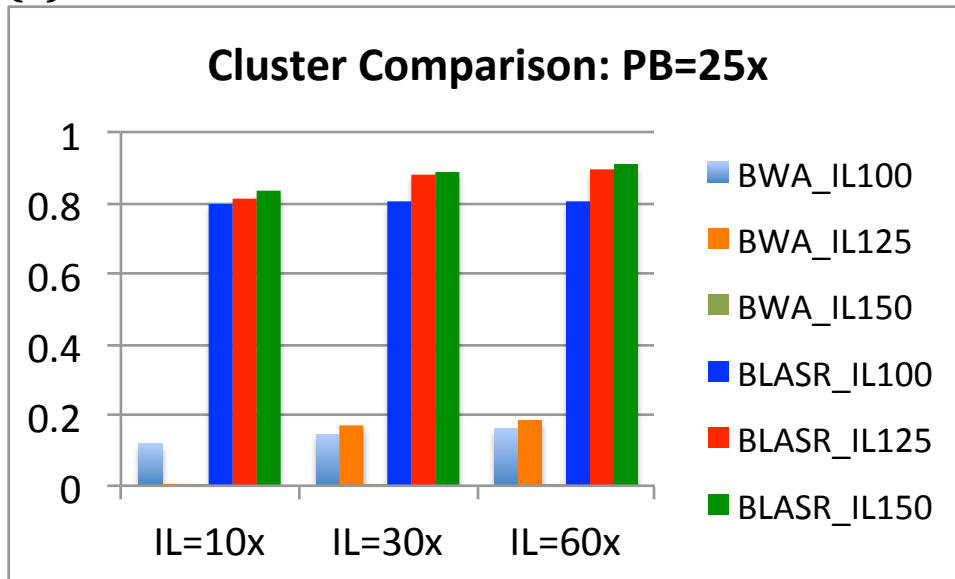

(f)

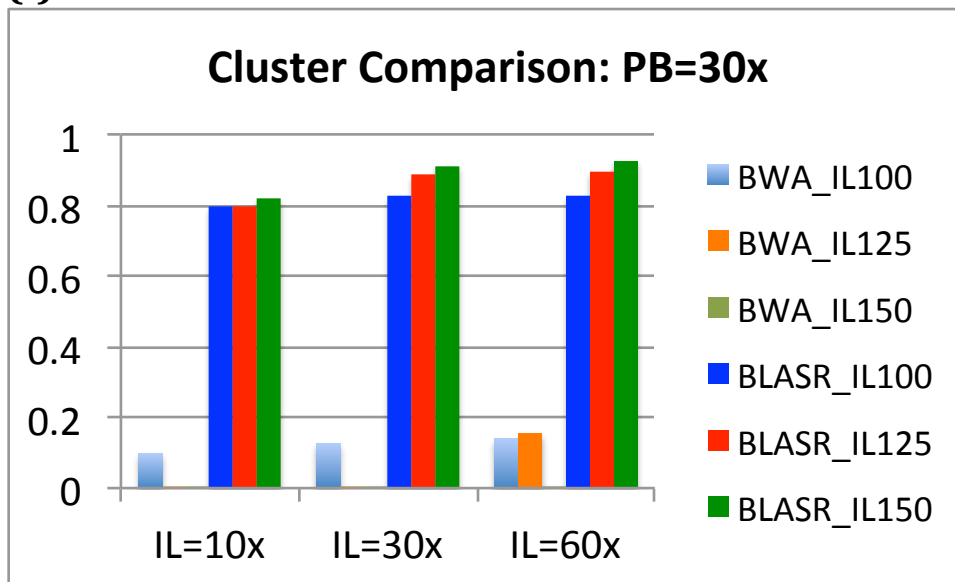

Supplemental Fig. 1 Quality of clusters computed on alignments obtained by BWA and BLASR. Each of the six panels, (a) – (f), corresponds to a different PacBio read coverage,  $N\times$ , as indicated by the “PB= $N\times$ ”. Each panel has three groups of bars, corresponding, from left to right, to Illumina coverage of  $10\times$ ,  $30\times$ , and  $60\times$ , respectively. Within each group, the results for BWA and BLASR are shown for three different Illumina read lengths. The y-axis measures the quality of the clustering using the Jaccard index (see Methods). Note that results obtained from BWA are near zero in several instances.
