# Supplementary material for: HySA: a Hybrid Structural variant Assembly approach using next-generation and single-molecule sequencing technologies
Source: PubMed Central journal article supplement — Genome Res. 2017 May;27(5):793–800. doi: 10.1101/gr.214767.116 (PMC5411774; doi:10.1101/gr.214767.116), 2017-05
Supplement: supp_gr.214767.116_Supplemental_Fig_S3.pdf [file supp_gr.214767.116_Supplemental_Fig_S3.pdf]

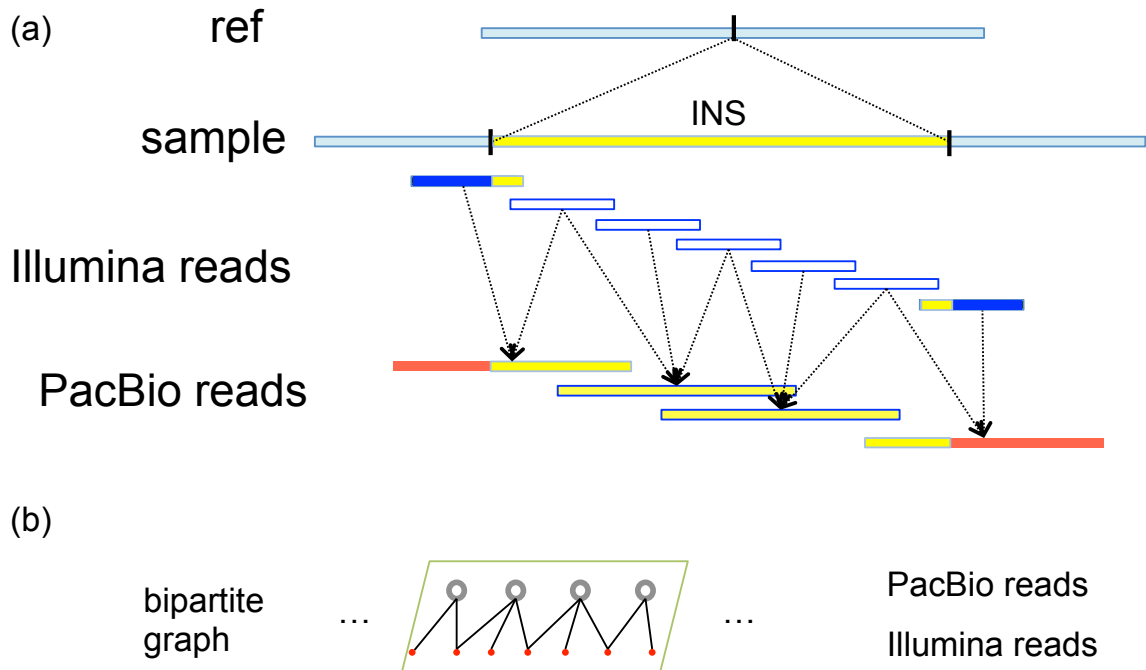

Supplemental Fig. 3 Illustration of read clustering in a novel insertion. (a) The sample (second bar) has an insertion (yellow) against the reference (first light blue bar). Illumina and PacBio reads sequenced in this region were unmapped (hollow blue bars for Illumina reads), clipped (yellow segments extending into the inserted sequence), or did not have correct alignments (yellow bars with boundaries for PacBio reads) when aligned to the reference. Dotted arrows show reliable alignments from Illumina reads to PacBio reads. (b) Bipartite graph representation clusters the reads together.
