# Supplementary material for: HySA: a Hybrid Structural variant Assembly approach using next-generation and single-molecule sequencing technologies
Source: PubMed Central journal article supplement — Genome Res. 2017 May;27(5):793–800. doi: 10.1101/gr.214767.116 (PMC5411774; doi:10.1101/gr.214767.116), 2017-05
Supplement: supp_gr.214767.116_Supplemental_Fig_S4.pdf [file supp_gr.214767.116_Supplemental_Fig_S4.pdf]

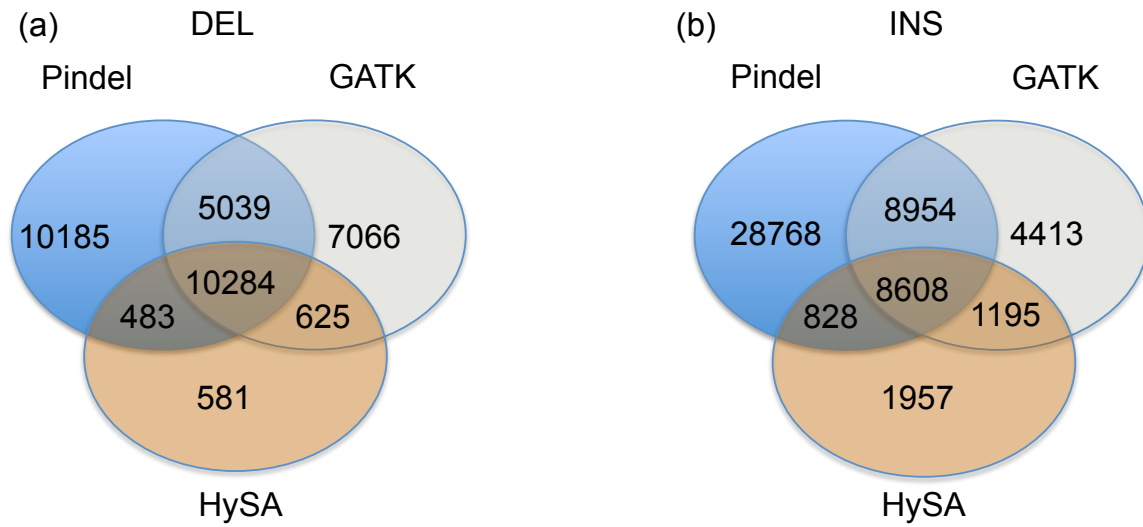

Supplemental Fig. 4 Venn diagrams of small (a) deletion (b) insertion calls among Pindel, GATK and HySA on NA12878.
