# Supplementary material for: HySA: a Hybrid Structural variant Assembly approach using next-generation and single-molecule sequencing technologies
Source: PubMed Central journal article supplement — Genome Res. 2017 May;27(5):793–800. doi: 10.1101/gr.214767.116 (PMC5411774; doi:10.1101/gr.214767.116), 2017-05
Supplement: supp_gr.214767.116_Supplemental_Fig_S5.pdf [file supp_gr.214767.116_Supplemental_Fig_S5.pdf]

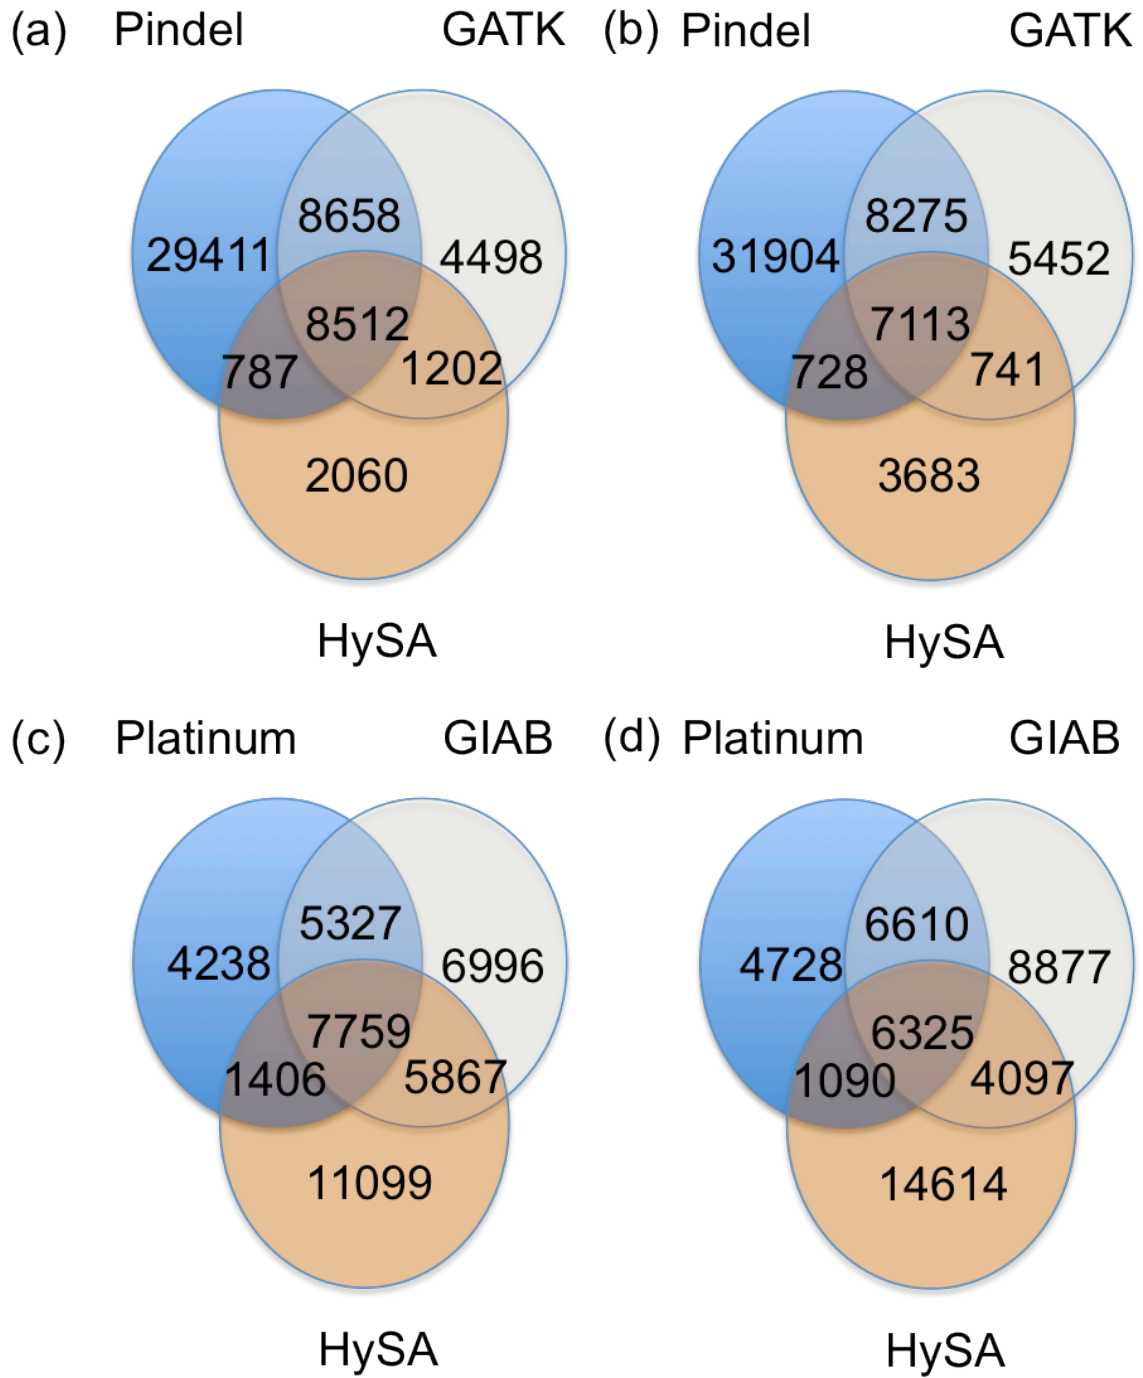

Supplemental Fig. 5 Venn diagram of small insertion calls of CHM1 with (a) 30bp and (b) 10bp padding; and NA12878 with (c) 30bp and (d) 10bp padding.
