# Supplementary material for: HySA: a Hybrid Structural variant Assembly approach using next-generation and single-molecule sequencing technologies
Source: PubMed Central journal article supplement — Genome Res. 2017 May;27(5):793–800. doi: 10.1101/gr.214767.116 (PMC5411774; doi:10.1101/gr.214767.116), 2017-05
Supplement: supp_gr.214767.116_Supplemental_Fig_S6.pdf [file supp_gr.214767.116_Supplemental_Fig_S6.pdf]

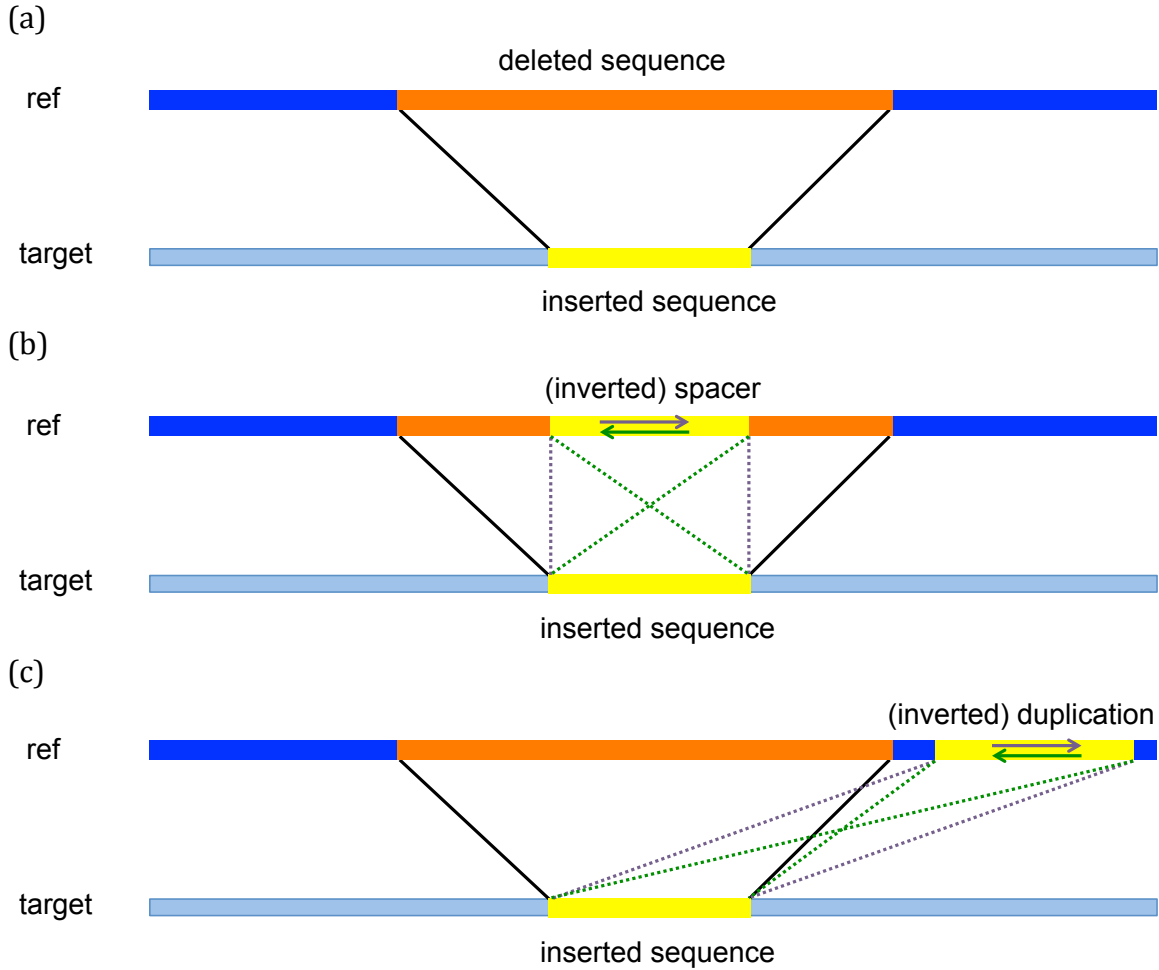

Supplemental Fig. 6 Illustration of complex deletions with insertion. (a) Target sequence (light blue) has a deletion (orange) and an insertion (yellow) as compared with the reference (dark blue). (b) Inserted sequence can be (reversely) mapped to the deleted sequence, and it is counted as an (inverted) spacer. (c) Inserted sequence can be (reversely) mapped to the flanking region of the deletion, and it is counted as a (inverted) duplication. For (b) and (c), dotted purple lines and the forward purple arrows represent that the alignment of the spacer/duplication is in the same orientation as the reference; dotted green lines and the backward green arrows represent that the alignment of the spacer/duplication is in the reverse orientation as the reference.
