# Supplementary material for: HySA: a Hybrid Structural variant Assembly approach using next-generation and single-molecule sequencing technologies
Source: PubMed Central journal article supplement — Genome Res. 2017 May;27(5):793–800. doi: 10.1101/gr.214767.116 (PMC5411774; doi:10.1101/gr.214767.116), 2017-05
Supplement: supp_gr.214767.116_Supplemental_Fig_S7.pdf [file supp_gr.214767.116_Supplemental_Fig_S7.pdf]

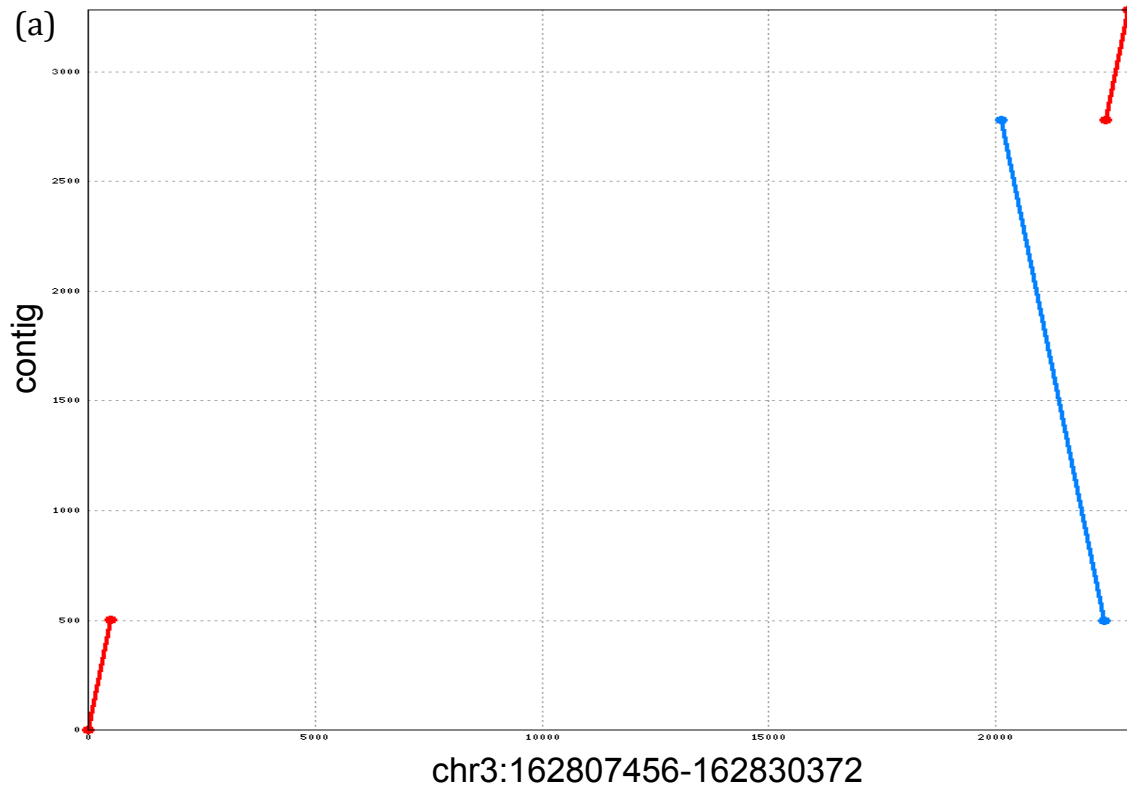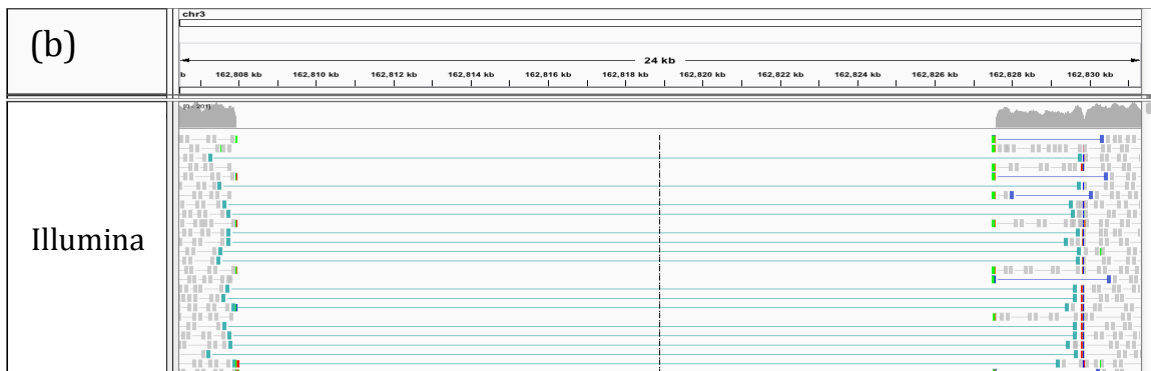

Supplemental Fig. 7 A complex event (deletion + inverted spacer). (a) Dot plot of the alignment of the contig to chr3:162807456-162830372 on NCBI build v38 using nucmer (Delcher et al. 1999) (b) Screenshot of Integrative Genomics Viewer (IGV) of reference alignment of Illumina reads on the same focal region.

## Reference

Delcher AL, Kasif S, Fleischmann RD, Peterson J, White O, Salzberg SL. 1999. Alignment of whole genomes. *Nucleic Acids Res* **27**: 2369-2376.
