# Supplementary material for: HySA: a Hybrid Structural variant Assembly approach using next-generation and single-molecule sequencing technologies
Source: HighWire-hosted journal article supplement (doi:10.1101/gr.214767.116), 2017-01-19
Supplement: Supplemental_Results.docx [file Supplemental_Results.docx]

**Supplemental Results**

**of**

**HySA: A Hybrid Structural variant Assembly approach using next generation and single-molecule sequencing technologies**

Xian Fan1,2, Mark Chaisson3, Luay Nakhleh1, Ken Chen2,4

1 Department of Computer Science, Rice University, Houston, Texas, USA

2 Department of Bioinformatics and Computational Biology, Division of Quantitative Sciences, The University of Texas MD Anderson Cancer Center, Houston, Texas, USA

3 Department of Genome Sciences, University of Washington School of Medicine, Seattle, Washington, USA

4 Corresponding author: Ken Chen (kchen3@mdanderson.org)

Table of Contents

Detailed description of steps in Algorithm 1 3

Detailed description of steps in Algorithm 2 4

Examining the quality of the bipartite graph 5

Running HySA on CHM1 and NA12878 data 6

Generating curated large deletion calls (>50bp) for CHM1 and NA12878 7

Calculating large deletion signals for CHM1 8

Estimating FDR for Large Deletion Calls by WGA of Berlin et al. 8

Validating insertion for CHM1 and NA12878 9

Comparison with Pindel and GATK 9

Comparison with Platinum and GIAB 9

Validation of SVs using fosmid data 10

Complex deletion validation 10

Coverage Analysis 11

Comparison criteria on call sets 11

BLASR reference alignment of PacBio reads 12

References 13

# Detailed description of steps in Algorithm 1

**Step 2** **(Extracting Illumina reads**)

After aligning Illumina reads to the reference by BWA-MEM (Li 2013) (0.7.5a-r405), the read pairs that are discordant, unmapped, or have at least one read clipped or containing a large gap are extracted. Given a pre-computed average insert size and standard deviation from a random 10,000 base pair (bp) region from the whole genome alignment, a read pair is deemed discordant if one of the following three happens:

1. The read pair’s insert size is ;
2. The paired reads’ orientation or position is abnormal;
3. The paired reads are aligned to two chromosomes.

Clipped reads should meet the quality requirement (median base quality of the clipped sequence > 35). Discordant reads, unmapped reads and reads with a large gap should have the median base quality > 35. All reads should have median base quality of both ends (20bp) > 35, and mapping quality > 0 for mapped reads.

**Step 3 (Aligning extracted Illumina reads to PacBio reads)**

After removing the hairpin adaptor sequence from the PacBio polymerase read with pls2fasta (Chaisson and Tesler 2012), we partition the resulting sub-reads into multiple FASTA files so that each file is approximately the size of a reference genome. With a customized version of BLASR (downloadable from <https://github.com/mchaisso/blasr> with number [82553d6](https://bitbucket.org/xianfan/hybridassemblysv/commits/82553d6)) that has one more option (-minInterval) allowing the recovery of more hits, we align all extracted Illumina reads to each sub-read file (-nCandidates 40 -minInterval 40 –maxScore 0 –minMatch 4 –maxMatch 13 -bestn 5). BLASR was developed to align PacBio reads to the reference. Our usage (aligning Illumina to PacBio reads) of it, although not typical, has been proven effective in terms of alignment accuracy as compared with other aligners such as BWA (**Supplemental Fig. 1**).

# Detailed description of steps in Algorithm 2

**Step 4 (Assembling PacBio reads)**

We use Celera Assembler (Myers et al. 2000) (8.3rc1) to assemble PacBio reads in each cluster (ovlErrorRate=0.40 utgGraphErrorRate=0.40 cnsErrorRate=0.40 cgwErrorRate=040 unitigger=bogart obtErrorRate=0.30).

**Step 5 (Aligning assembled contigs to the reference)**

The assembled contigs are aligned to the reference with BLASR (Chaisson and Tesler 2012) (version: 1.3.1, parameter: -maxAnchorsPerPosition 100 –advanceExactMatches 10 –affineAlign –affineOpen 100 –affineExtend 0 –insertion 5 –deletion 5 –extend –maxExtendDropoff 20 –clipping subread –bestn 3).

**Step 7 (Aligning Illumina reads in the same cluster to the assembled contig)**

We align the Illumina reads in the same cluster to the contig that generates the SV using the customized BLASR (Chaisson and Tesler 2012) with parameters (-nCandidates 1 -minInterval 40 –maxScore 0 –minMatch 4 –maxMatch 13 -bestn 1). We use Illumina read pairs that are not discordant, unmapped, or have at least one read clipped or containing a large gap using the same criteria we described in Algorithm 1, Step 2.

**Step 8 (Confirming structural variant)**

In determining deletions, we require that the Illumina reads’ sequence matches 10bp on the left and right flanking region of the breakpoint with > 70 percentage of identity. In confirming insertion calls, we require that the Illumina reads’ inserted sequence matches that of the PacBio reads’ inserted sequence with > 70 percentage of identity.

# Examining the quality of the bipartite graph

The quality of our approach is governed by the accuracy of the bipartite graph that we construct from the data. To assess the quality of our approach, we performed a simulation experiment using the nucleotide sequence of chromosome 21. We randomly selected 310 positions on chromosome 21 that were separated by at least 60 kbp and at least 30 kbp from any gap. On chromosome 21, we used wgsim (Li et al. 2009) to simulate paired-end Illumina reads spanning the selected positions at a coverage of 5×, 10× 15×, 20×, 25× and 30× and a read length of 100, 125 and 150 bps, respectively. On the same chromosome, we used PBSIM (Ono et al. 2013) (1.0.3, with options --difference-ratio 5:75:20 --length-mean 12000 --accuracy-mean 0.85 --model_qc model_qc_clr; model_qc_clr was provided by PBSIM package) to simulate PacBio reads at a coverage of 10×, 30× and 60×, respectively. The alignment from Illumina reads to PacBio reads was done by BWA-MEM (0.7.10 with option -x pbread) and BLASR (customized version, with options -minInterval 40 -nCandidates 40 -maxScore 0 -minMatch 4 -maxMatch 13. -bestn is twice of the PacBio coverage) followed by filtering (> 87% percentage of identity, > 87% aligned sequence on one end).

We then aligned each set of Illumina reads to each set of PacBio reads using BWA-MEM with the “pbread” option and BLASR, respectively, and compared clusters of reads identified using our algorithms against the ground truth, i.e., clusters of reads derived from the known positions of the synthetic reads. For a pair of clusters (, ), each containing a set of reads, from the inferred clustering, from the ground truth, we computed the Jaccard index . For each cluster from the ground truth, we found its largest Jaccard index from all the clusters in the inferred clusters and assigned it to be ’s Jaccard index. We defined the 10% quantile of the Jaccard indices as JI90. By this definition, 90% of the clusters have Jaccard indices greater than or equal to JI90. Therefore, JI90 is a metric ranging from 0 to 1 with 1 indicating perfect inference of the clusters. We measured the accuracy of clustering using JI90. We found that JI90 increased generally as coverage and read length increased and that BLASR led to considerably higher JI90 than BWA when PacBio coverage increased to over 10× (**Supplemental Fig. 1**). With over 15× PacBio coverage, the JI90 obtained with BLASR increased to greater than 0.6 in all Illumina coverages and read lengths. It further increased to 0.8 when the Pacbio coverage was over 25x, indicating that BLASR and our subsequent bipartite graph partitioning algorithms effectively hybridized Illumina and PacBio reads and generated a reasonably accurate representation of the targeted regions in the genome.

# Running HySA on CHM1 and NA12878 data

In the CHM1 experiment, we downloaded raw PacBio reads from [https://s3.amazonaws.com/datasets.pacb.com/2014/Human54x/raw/human54x_set[0-34].tgz](https://s3.amazonaws.com/datasets.pacb.com/2014/Human54x/raw/human54x_set%5b0-34%5d.tgz) and Illumina reads from the NCBI GenBank with accession number SRX652547. We aligned the Illumina reads to the GRCh37 assembly using BWA-MEM (0.7.5a-r405, default parameter) to generate the BAM for HySA.

In the NA12878 experiment, we downloaded raw PacBio reads from the NCBI GenBank with accession numbers SRX627421 and SRX638310 and Illumina reads from <ftp://ftp-trace.ncbi.nlm.nih.gov/giab/ftp/data/NA12878/NIST_NA12878_HG001_HiSeq_300x/>. We aligned the Illumina reads to the GRCh38 assembly by BWA-MEM (0.7.5a-r405, with options -M -T0) to generate the BAM for HySA. We subsequently ran HySA on these two samples (see README.md in **Supplemental Software**) for large and small indels, as well as in the complex mode for NA12878’s complex deletions.

# Generating curated large deletion calls (>50bp) for CHM1 and NA12878

We downloaded 11,311 deletion calls generated from PacBio reads from http://eichlerlab.gs.washington.edu/publications/chm1-structural-variation/data/GRCh37/deletions.bed, of which 7,195 were large deletions (>50 bp). We ran Delly (0.7.2, default parameter) on the 50× Illumina data and combined them with the 7,195 large deletion calls into one set. For each call in this set, we reconstructed the alternative allele by concatenating the sequences from two breakpoints on the reference (GRCh37). We extracted soft-clipped (10 clipped bases) and unmapped Illumina reads that had positive mapping quality and <3 mismatches falling within [-500, 50] bp of the left breakpoint and [-50, 500] bp of the right breakpoint to the alternative allele and aligned (BWA-MEM 0.7.5a-r405, default parameter) them to the reconstructed alternative alleles. If an Illumina read aligned to the reconstructed alternative allele without soft clipping and simultaneously spanned the breakpoint, it was counted as genotyping the call. A call was curated if it was genotyped by at least two Illumina reads.

In the NA12878 experiments, we downloaded calls generated by svclassify (<ftp://ftp-trace.ncbi.nlm.nih.gov/giab/ftp/technical/svclassify_Manuscript/Supplementary_Information/Personalis_1000_Genomes_deduplicated_deletions.bed>), PBHoney and a customized pipeline (column D and E in Supplementary Table 5 of Pendleton et al.). We ran Delly (0.7.2, default parameter) on the 300X Illumina BAM file. The five call sets, including ours, were combined and de-duplicated. For each call in this union set, we reconstructed the alternative allele by concatenating sequences from two breakpoints on the reference (GRCh38) in the same manner as that in CHM1. The reconstructed alternative allele was aligned (BWA-MEM 0.7.5a-r405, default parameter) to the NA12878 WGA (Pendleton et al. 2015) downloaded from <ftp://ftp.ncbi.nlm.nih.gov/genomes/all/GCA_001013985.1_ASM101398v1/GCA_001013985.1_ASM101398v1_genomic.fna.gz>. A call was counted as validated if the alignment met the same criterion as that in the validation of CHM1 deletion calls by WGA of Berlin et al.

# Calculating large deletion signals for CHM1

In calculating the variant-supporting Illumina read number, we used the same strategy as described for generating curated calls in CHM1, except that we extracted all soft clipped and unmapped reads and aligned them to the reconstructed alternative allele. In calculating the variant-supporting PacBio read number, for each call, we selected

the PacBio reads that overlapped with [-100, 100] bp of the left breakpoint, for which the alignment to the reference had the total length of the clipped end 1) < 500bp, and 2) < 0.2 of the total read length. A read was counted as supporting the variant if it had a deletion gap starting within 300bp of the inferred left breakpoint, and the deletion size was within 30bp of the inferred SV size.

# Estimating FDR for Large Deletion Calls by WGA of Berlin et al.

To evaluate the FDR of our large deletion calls, we reconstructed the alternative allele from our calls by concatenating the sequences (500bp on each end) from two breakpoints on the reference (GRCh37) and aligned (BWA-MEM, 0.7.5a-r405, default parameter) the concatenated sequence (total length = 1000bp) to the WGA of Berlin et al. (Berlin et al. 2015) downloaded from <ftp://ftp.ncbi.nlm.nih.gov/genomes/all/GCA_000772585.3_ASM77258v3/GCA_000772585.3_ASM77258v3_genomic.fna.gz>. The calls that had both the largest gap and clipped sequence < 50bp, and the total length of all gaps and clipped sequence < 100bp were counted as validated. Among the calls that could not be directly validated by the WGA of Berlin et al., 63/450 overlapped with the curated call set. For the rest of the 387 calls, we extracted soft-clipped Illumina reads from [-500, 50] of the left breakpoint and [-50, 500] of the right breakpoint and aligned them to the alternative allele. There were 160 calls that had >= 2 Illumina reads that were not clipped and spanned the breakpoint. Treating these two sets of calls as validated, an estimate of FDR that was likely more accurate was < 7.5% (227/3007).

# Validating insertion for CHM1 and NA12878

For each insertion call > 500bp, we extracted the inserted sequence and aligned it to the reference (BWA-MEM, 0.7.5a-r405). For CHM1, the reference included the GRCh37, GRCh38, the WGA of Berlin et al. (Berlin et al. 2015) and assembled contigs from Chaisson et al. (the fifth column in <http://eichlerlab.gs.washington.edu/publications/chm1-structural-variation/data/GRCh37/insertions.bed>). Duplicate calls with the same contig were not included in the calculation. The 29 insertions calls validated by GRCh38 or the WGA of Berlin et al. but not by Chaisson et al. were manually inspected by samtools tview (Li et al. 2009) for the Illumina reads. For NA12878, the reference included the GRCh38, the hybrid assembly (Pendleton et al. 2015) and fosmid data of NA12878 (Kidd et al. 2008) (GenBank Bioproject 29893, selected with ID ABC12). For both CHM1 and NA12878, if an insertion had an alignment with the largest gap < 50 bp, clipped sequence length < 100 bp, and the matched sequence > 0.9 of the total sequence length, it was counted as validated.

# Comparison with Pindel and GATK

Pindel (0.2.5) was run with the default parameter and post-filtering of 5 supporting split reads. GATK was run on three steps: HaplotypeCaller (--genotyping_mode DISCOVERY -stand_emit_conf 10 -stand_call_conf 30), SelectVariants (-selectType INDEL) and VariantFiltration (--filterExpression "QD < 2.0 || FS > 200.0 || ReadPosRankSum < -20.0" --filterName "indel_filter").

# Comparison with Platinum and GIAB

Platinum’s small indel calls were downloaded from <ftp://platgene_ro@ussd-ftp.illumina.com/hg19/8.0.1/NA12878/NA12878.vcf.gz>. GIAB’s small indel calls were downloaded from <ftp://ftp-trace.ncbi.nih.gov/giab/ftp/release/NA12878_HG001/NISTv3.2.2/NA12878_GIAB_highconf_IllFB-IllGATKHC-CG-Ion-Solid_ALLCHROM_v3.2.2_highconf.vcf.gz>.

# Validation of SVs using fosmid data

We downloaded fosmid end sequencing data in the 1000 Genomes Project (432 clones, 16.7M bases, downloaded from <ftp://ftp.1000genomes.ebi.ac.uk/vol1/ftp/technical/working/20120627_NA12878_fosmid_data/NA12878.fosmid.ABC12.Q80.cleaned.fastq.gz>), which was used previously for studying the enrichment of structural variation and challenges for translation (Rimmer et al. 2014). We generated a call set by aligning these fosmid reads against GRCh38 reference genome (BWA-MEM 0.7.5a-r405, default parameter) and identifying indels from CIGAR strings (“I” or “D”) in the primary alignments. We also delineated genomic regions covered by at least one fosmid read (fosmid covered regions).

We examined the large (>50 bp) deletions predicted by the HySA, Delly, PBHoney, custom and svclassify approaches in fosmid covered regions (overlap at least 1 bp) and identified deletions that had at least 1 bp overlap with the fosmid calls in the same size range (>50 bp) and less than 10 bp difference in SV size. These deletions are regarded as “validated”.

Similar approach and criteria were applied to validate small indels (>10 bp, ≤50 bp) predicted by HySA, Platinum and GIAB, except that we allowed a 50 bp offset in the breakpoint positions to account for ambiguity of breakpoints in repetitive sequence context and sparseness of the fosmid data.

# Complex deletion validation

We validated complex deletions in the regions covered by the fosmid data downloaded from <ftp://ftp.1000genomes.ebi.ac.uk/vol1/ftp/technical/working/20120627_NA12878_fosmid_data/NA12878.fosmid.ABC12.Q80.cleaned.fastq.gz>.We constructed alternative allelic sequences representing these deletions from the assembled contigs, consisting of 50 bp flanking sequences on both ends of the deletions and the inserted sequences in the middle. We then aligned each of these alternative alleles to the fosmid reads using BWA-MEM (0.7.5a-r405, default parameter). Alternative alleles that match any fosmid reads with > 90% aligned bases and < 10 bp gap/clipped bases in the aligned portion were considered as validated.

# Coverage Analysis

To provide a guideline for experimental design, we estimated the discovery sensitivity of our algorithm as a function of the Illumina coverage from 30× to 300× and the PacBio coverage from 5× to 30× on chromosome 20 (**Fig. 4**). Specifically, we down-sampled extracted Illumina reads to 150×, 90×, 60×, 30×, and PacBio reads to 25×, 20×, 15×, 10×, 5×. For each coverage combination, the bipartite graph was built and partitioned into small clusters. For each validated call, if at least 5 PacBio reads remained in a cluster corresponding to that from the highest coverage (300× for Illumina and 31× for PacBio), it was counted as detected. For comparison, we down-sampled all Illumina reads that aligned to chromosome 20 to 150×, 90×, 60× and 30×, and ran Delly (0.7.2, default parameter) on the BAMs generated at each coverage.

We then measured the sensitivity at each coverage for both HySA and Delly. The sensitivity was defined as the fraction of the large deletions that our algorithm or Delly detected in the GD set. As expected, the sensitivities increased with the increase of PacBio or Illumina coverage. However, the gain of sensitivity decreased with the increase of PacBio coverage, and the largest gain (~0.25) was observed from 5× to 10× at all the inspected Illumina coverages. The PacBio coverage no longer benefited sensitivity to a great extent after it reached 25×. Likewise, the gain of sensitivity decreased with the increase of Illumina’s coverage, and saturation was observed at 60× when PacBio’s coverage reached 25×. Therefore, a likely optimal combination of coverage would be 60× Illumina and 25× PacBio reads, in order to obtain the most cost-effective hybrid SV assembly in a diploid genome using our approach.

# Comparison criteria on call sets

In both the CHM1 and NA12878 analyses, a 50% reciprocal criterion was used to overlap large deletions. The 1 bp overlapping criterion was used to compare small indels. For all insertions, 50 bp were padded on the left and right of the insertion breakpoints. To obtain more comprehensive results, smaller padding sizes (30 bp and 10 bp) were applied in both the CHM1 and the NA12878 experiments (**Supplemental Fig. 5).**

# BLASR reference alignment of PacBio reads

We use the following options of BLASR for reference alignment of the CHM1 data (-bestn 24 -maxAnchorsPerPosition 100 -advanceExactMatches 10 -affineAlign -affineOpen 100 -affineExtend 0 -insertion 5 -deletion 5 -extend -maxExtendDropoff 20 -clipping subread -clipping soft -nproc 24).

# References

Berlin K, Koren S, Chin CS, Drake JP, Landolin JM, Phillippy AM. 2015. Assembling large genomes with single-molecule sequencing and locality-sensitive hashing. *Nat Biotechnol* **33**: 623-630.

Chaisson MJ, Tesler G. 2012. Mapping single molecule sequencing reads using basic local alignment with successive refinement (BLASR): application and theory. *Bmc Bioinformatics* **13**.

Kidd JM, Cooper GM, Donahue WF, Hayden HS, Sampas N, Graves T, Hansen N, Teague B, Alkan C, Antonacci F et al. 2008. Mapping and sequencing of structural variation from eight human genomes. *Nature* **453**: 56-64.

Li H. 2013. Aligning sequence reads, clone sequences and assembly Aligning sequence reads, clone sequences and assembly contigs with BWA-MEM. *arxiv*.

Li H, Handsaker B, Wysoker A, Fennell T, Ruan J, Homer N, Marth G, Abecasis G, Durbin R, Proc GPD. 2009. The Sequence Alignment/Map format and SAMtools. *Bioinformatics* **25**: 2078-2079.

Myers EW, Sutton GG, Delcher AL, Dew IM, Fasulo DP, Flanigan MJ, Kravitz SA, Mobarry CM, Reinert KH, Remington KA et al. 2000. A whole-genome assembly of Drosophila. *Science* **287**: 2196-2204.

Ono Y, Asai K, Hamada M. 2013. PBSIM: PacBio reads simulator-toward accurate genome assembly. *Bioinformatics* **29**: 119-121.

Pendleton M, Sebra R, Pang AW, Ummat A, Franzen O, Rausch T, Stutz AM, Stedman W, Anantharaman T, Hastie A et al. 2015. Assembly and diploid architecture of an individual human genome via single-molecule technologies. *Nat Methods* **12**: 780-786.

Rimmer A, Phan H, Mathieson I, Iqbal Z, Twigg SR, Consortium WGS, Wilkie AO, McVean G, Lunter G. 2014. Integrating mapping-, assembly- and haplotype-based approaches for calling variants in clinical sequencing applications. *Nature genetics* **46**: 912-918.
