# Supplementary material for: HySA: a Hybrid Structural variant Assembly approach using next-generation and single-molecule sequencing technologies
Source: HighWire-hosted journal article supplement (doi:10.1101/gr.214767.116), 2017-01-19
Supplement: Supplemental_Table_S1.xlsx [file Supplemental_Table_S1.xlsx]

## Sheet: CHM1.largeDEL
Chr	Start	End	Size	Curated	HySA	HySAValidated	HySAStart	HySAEnd	DELLYContribute	ChaissonContribute
1	100148577	100148638	61	1	0	NA	NA	NA	0	1
1	101388563	101388884	321	1	1	1	101388563	101388883	1	1
1	101724132	101724209	77	1	1	1	101724133	101724209	1	1
1	103047692	103048023	331	1	1	1	103047680	103048010	1	1
1	103096080	103096400	320	1	1	1	103096080	103096399	1	1			col E, F, J, K: 1 represent yes, 0 no.
1	103110990	103111058	68	1	1	1	103110991	103111058	0	1
1	104443199	104443726	527	1	1	1	104443200	104443726	1	1
1	104451504	104451659	155	1	1	1	104451504	104451658	1	0
1	10482502	10483802	1300	1	1	1	10482481	10483781	1	0
1	105255033	105256190	1157	1	1	1	105255033	105256189	1	0
1	105428320	105428651	331	1	1	1	105428320	105428650	1	1
1	105866783	105867058	275	1	1	1	105866772	105867046	1	1
1	106969624	106969787	163	1	1	1	106969625	106969787	1	1
1	109573232	109575182	1950	1	1	1	109573233	109575182	1	0
1	109597727	109598059	332	1	1	1	109597712	109598044	1	1
1	112074697	112074809	112	1	1	1	112074698	112074809	1	1
1	112674352	112676183	1831	0	1	1	112674352	112676183	0	0
1	112835105	112837684	2579	1	1	1	112835106	112837684	1	0
1	113611324	113613779	2455	1	1	1	113611339	113613794	0	1
1	113799631	113800094	463	1	1	1	113799632	113800094	1	1
1	115043531	115043844	313	1	1	1	115043522	115043834	1	1
1	11525228	11525293	65	1	1	1	11525226	11525288	1	1
1	115796902	115797187	285	1	1	1	115796900	115797184	1	1
1	11682896	11683190	294	1	1	1	11682897	11683190	1	1
1	120675959	120676675	716	0	1	1	120675959	120676675	0	0
1	121351983	121352321	338	1	0	NA	NA	NA	0	1
1	121353289	121354976	1687	1	0	NA	NA	NA	0	1
1	121363045	121363317	272	1	0	NA	NA	NA	0	1
1	121367040	121367308	268	1	0	NA	NA	NA	0	1
1	121370888	121371563	675	0	1	1	121370888	121371563	0	0
1	121476210	121478377	2167	1	0	NA	NA	NA	0	1
1	13454801	13454877	76	0	1	1	13454801	13454877	0	0
1	13696725	13696783	58	0	1	0	13696725	13696783	0	0
1	13999735	14000047	312	1	1	1	13999723	14000034	1	1
1	142915242	142915308	66	0	1	1	142915242	142915308	0	0
1	142916433	142916501	68	0	1	1	142916433	142916501	0	0
1	143434963	143435059	96	0	1	0	143434963	143435059	0	0
1	14436308	14438242	1934	1	1	0	14436309	14438242	1	0
1	14436354	14436660	306	1	0	NA	NA	NA	1	1
1	144894098	144895094	996	0	1	1	144894098	144895094	0	0
1	144896301	144906703	10402	0	1	1	144896301	144906703	0	0
1	144905374	144905457	83	0	1	0	144905374	144905457	0	0
1	145142706	145143422	716	1	1	1	145142706	145143422	0	1
1	145185766	145186078	312	1	0	NA	NA	NA	0	1
1	146961501	146961572	71	0	1	1	146961501	146961572	0	0
1	148855338	148855513	175	0	1	1	148855338	148855513	0	0
1	149350913	149351224	311	0	1	1	149350913	149351224	0	0
1	149891685	149892030	345	1	1	1	149891707	149892048	0	1
1	150037852	150037909	57	1	1	1	150037852	150037908	1	1
1	150339833	150339891	58	1	0	NA	NA	NA	0	1
1	150339889	150339947	58	0	1	1	150339889	150339947	0	0
1	150691451	150691786	335	1	1	1	150691451	150691785	1	1
1	151905216	151905316	100	1	1	1	151905230	151905329	0	1
1	152555544	152587741	32197	1	0	NA	NA	NA	1	0
1	15365266	15365321	55	1	0	NA	NA	NA	0	1
1	15365284	15365394	110	0	1	1	15365284	15365394	0	0
1	156526723	156528955	2232	1	1	1	156526705	156528936	1	0
1	156806526	156806578	52	1	0	NA	NA	NA	0	1
1	157540661	157540877	216	1	1	1	157540662	157540877	1	1
1	158629387	158629716	329	1	1	1	158629387	158629715	1	1
1	158851665	158851722	57	1	1	1	158851690	158851746	0	1
1	158851710	158851767	57	1	1	1	158851690	158851746	1	0
1	158867534	158869982	2448	1	1	1	158867531	158869982	1	0
1	159648708	159649659	951	1	1	1	159648708	159649658	1	0
1	1598414	1598582	168	1	0	NA	NA	NA	0	1
1	162052680	162053001	321	1	1	1	162052680	162053000	1	1
1	162230748	162231241	493	1	1	1	162230749	162231278	1	0
1	1649027	1649078	51	1	0	NA	NA	NA	0	1
1	165499211	165499272	61	1	0	NA	NA	NA	1	0
1	165731211	165731491	280	1	1	1	165731215	165731496	0	1
1	16987230	16988990	1760	0	1	1	16987230	16988990	0	0
1	17071465	17073228	1763	0	1	1	17071465	17073228	0	0
1	171783587	171783650	63	1	1	1	171783588	171783650	1	1
1	176478219	176478776	557	1	1	1	176478219	176478775	1	0
1	17676173	17677666	1493	0	1	1	17676173	17677666	0	0
1	17684763	17685089	326	1	1	1	17684781	17685103	0	1
1	180183846	180184166	320	1	1	1	180183831	180184151	1	1
1	180293004	180293329	325	1	1	1	180292991	180293315	1	1
1	182478500	182478575	75	1	0	NA	NA	NA	0	1
1	182674680	182674862	182	1	1	1	182674680	182674861	1	1
1	182690105	182690201	96	1	1	1	182690143	182690239	0	1
1	184814743	184820800	6057	1	1	1	184814743	184820799	1	1
1	184937053	184937376	323	1	1	1	184937039	184937361	1	1
1	185009806	185011739	1933	1	1	1	185009803	185011735	1	0
1	185373106	185373445	339	1	1	1	185373105	185373443	1	1
1	185416363	185418605	2242	1	1	1	185416352	185418602	1	0
1	187464829	187465034	205	0	1	0	187464829	187465034	0	0
1	187716106	187722535	6429	1	1	1	187716106	187722534	1	0
1	188539456	188540232	776	1	1	1	188539455	188540230	1	0
1	188994964	188995300	336	1	1	1	188994950	188995285	1	1
1	189032978	189033032	54	1	0	NA	NA	NA	0	1
1	189033031	189033092	61	0	1	1	189033031	189033092	0	0
1	189661647	189661714	67	1	1	1	189661646	189661713	0	1
1	190597977	190598040	63	1	1	1	190597972	190598036	0	1
1	190837322	190837494	172	1	1	1	190837320	190837491	1	1
1	193235430	193235658	228	1	1	1	193235431	193235658	1	1
1	194060080	194060244	164	1	1	1	194060080	194060243	1	1
1	194350511	194351250	739	0	1	1	194350511	194351250	0	0
1	196158060	196158338	278	1	0	NA	NA	NA	1	1
1	197500520	197503284	2764	1	1	1	197500510	197503273	1	1
1	199438743	199440251	1508	1	1	1	199438728	199440235	1	1
1	200785976	200786078	102	0	1	1	200785976	200786078	0	0
1	201178922	201179030	108	0	1	1	201178922	201179030	0	0
1	204177511	204177570	59	1	0	NA	NA	NA	1	1
1	2052942	2053075	133	1	0	NA	NA	NA	0	1
1	208862797	208862861	64	1	1	1	208862791	208862854	1	1
1	210295320	210295640	320	1	1	1	210295320	210295639	1	1
1	213002371	213013669	11298	1	1	1	213002372	213013669	1	1
1	218182502	218188609	6107	1	1	1	218182503	218188610	1	1
1	218785930	218786251	321	1	1	1	218785914	218786234	1	1
1	219923323	219923642	319	1	1	1	219923309	219923627	1	1
1	220226026	220226109	83	1	1	1	220226027	220226109	1	1
1	220285471	220285792	321	1	1	1	220285456	220285776	1	1
1	2212109	2212366	257	0	1	1	2212109	2212366	0	0
1	222034158	222034491	333	1	1	1	222034145	222034477	1	1
1	223204701	223204780	79	1	1	1	223204701	223204780	0	1
1	224247117	224247594	477	1	1	1	224247117	224247593	1	0
1	224392834	224393148	314	1	1	1	224392835	224393148	1	1
1	225256545	225256816	271	1	1	1	225256535	225256805	1	1
1	225762305	225762626	321	1	1	1	225762320	225762638	0	1
1	227163840	227163920	80	1	1	1	227163841	227163921	0	1
1	227166214	227166459	245	1	1	1	227166207	227166451	1	1
1	227482279	227482598	319	1	1	1	227482279	227482597	1	1
1	227937461	227937531	70	1	1	1	227937452	227937521	1	1
1	228024106	228024419	313	1	1	1	228024106	228024418	1	1
1	228814818	228815155	337	1	0	NA	NA	NA	1	1
1	229812537	229820841	8304	1	1	1	229812538	229820841	1	1
1	230471296	230471372	76	0	1	1	230471296	230471372	0	0
1	232423133	232423462	329	1	1	1	232423133	232423461	1	1
1	232775540	232775855	315	1	1	1	232775540	232775854	1	1
1	232836576	232836761	185	1	1	1	232836576	232836760	1	1
1	233865156	233865487	331	0	1	1	233865156	233865487	0	0
1	233962210	233963553	1343	0	1	1	233962210	233963553	0	0
1	236054591	236054930	339	1	0	NA	NA	NA	1	1
1	236549103	236551347	2244	1	1	1	236549087	236551330	1	0
1	236594939	236595265	326	1	1	1	236594939	236595264	1	1
1	236796450	236796522	72	1	0	NA	NA	NA	0	1
1	240393003	240394783	1780	1	1	1	240393000	240394786	1	0
1	240617007	240617332	325	1	1	1	240617007	240617331	1	1
1	241149873	241150199	326	1	1	1	241149872	241150197	1	1
1	241186298	241186421	123	1	1	1	241186305	241186428	0	1
1	241360553	241360869	316	1	1	1	241360559	241360872	1	1
1	243782746	243783764	1018	1	1	1	243782746	243783760	1	0
1	24402987	24403307	320	1	1	1	24403002	24403319	0	1
1	244439361	244439507	146	0	1	1	244439361	244439507	0	0
1	244561125	244561185	60	1	0	NA	NA	NA	0	1
1	244746227	244746280	53	1	0	NA	NA	NA	1	1
1	245778217	245778318	101	0	1	1	245778217	245778318	0	0
1	245825880	245825960	80	1	0	NA	NA	NA	0	1
1	246558892	246558948	56	1	1	1	246558907	246558963	0	1
1	246685016	246685070	54	0	1	1	246685016	246685070	0	0
1	246969897	246969990	93	1	1	1	246969898	246969990	1	1
1	246989165	246989228	63	1	1	1	246989186	246989269	0	1
1	247536760	247536955	195	1	0	NA	NA	NA	0	1
1	247569561	247569792	231	1	1	0	247569523	247569752	1	1
1	247579918	247579981	63	1	0	NA	NA	NA	0	1
1	247579987	247580049	62	0	1	1	247579987	247580049	0	0
1	247850475	247856529	6054	1	1	1	247850476	247856529	1	1
1	248051493	248057639	6146	1	0	NA	NA	NA	1	1
1	248051504	248052443	939	0	1	0	248051504	248052443	0	0
1	25158703	25161526	2823	1	1	1	25158704	25161526	1	1
1	2584463	2584543	80	1	0	NA	NA	NA	0	1
1	2609043	2609365	322	1	0	NA	NA	NA	0	1
1	2617334	2617496	162	1	0	NA	NA	NA	0	1
1	26671523	26671574	51	0	1	1	26671523	26671574	0	0
1	2775807	2775886	79	1	0	NA	NA	NA	1	1
1	28247807	28248117	310	1	1	1	28247801	28248110	1	1
1	30298160	30298213	53	1	1	1	30298153	30298205	1	1
1	31367498	31367565	67	0	1	1	31367498	31367565	0	0
1	31649764	31649891	127	1	0	NA	NA	NA	0	1
1	35627129	35627450	321	1	0	NA	NA	NA	0	1
1	36042531	36042582	51	1	0	NA	NA	NA	0	1
1	3610338	3610508	170	0	1	1	3610338	3610508	0	0
1	36733254	36733496	242	0	1	1	36733254	36733496	0	0
1	36749219	36749271	52	1	0	NA	NA	NA	0	1
1	36749269	36749321	52	0	1	1	36749269	36749321	0	0
1	37206217	37206297	80	1	0	NA	NA	NA	0	1
1	37423421	37423725	304	1	0	NA	NA	NA	0	1
1	37423754	37424040	286	0	1	0	37423754	37424040	0	0
1	38208248	38208412	164	1	1	1	38208248	38208411	1	1
1	39084235	39085838	1603	0	1	1	39084235	39085838	0	0
1	39998206	40001247	3041	0	1	1	39998206	40001247	0	0
1	4059797	4059856	59	1	0	NA	NA	NA	0	1
1	4155159	4155474	315	1	1	1	4155148	4155462	1	1
1	42743187	42743503	316	1	1	1	42743180	42743495	1	1
1	43562745	43562796	51	1	0	NA	NA	NA	1	0
1	43857470	43857807	337	1	1	1	43857470	43857806	1	1
1	44371233	44371305	72	1	0	NA	NA	NA	0	1
1	44565500	44565569	69	1	1	1	44565521	44565590	0	1
1	44605949	44606033	84	1	0	NA	NA	NA	0	1
1	44606000	44606084	84	0	1	1	44606000	44606084	0	0
1	45983484	45983581	97	1	1	1	45983488	45983584	0	1
1	46366125	46366455	330	1	1	1	46366109	46366438	1	1
1	4871248	4871319	71	0	1	1	4871248	4871319	0	0
1	49549778	49549832	54	1	0	NA	NA	NA	0	1
1	55092274	55095968	3694	1	1	1	55092279	55095973	1	0
1	55334339	55334391	52	1	1	1	55334355	55334406	0	1
1	55468500	55468583	83	1	0	NA	NA	NA	0	1
1	56401293	56401615	322	1	1	1	56401285	56401606	1	1
1	56831124	56834980	3856	1	1	1	56831108	56834963	1	1
1	57242625	57242965	340	1	1	1	57242625	57242964	1	1
1	57861400	57861456	56	1	0	NA	NA	NA	0	1
1	57861455	57861511	56	0	1	1	57861455	57861511	0	0
1	58743913	58744827	914	1	1	1	58743913	58744826	1	0
1	59446782	59446886	104	1	0	NA	NA	NA	0	1
1	6065366	6065443	77	0	1	1	6065366	6065443	0	0
1	62390602	62390952	350	1	1	1	62390592	62390941	1	1
1	62589439	62589490	51	1	1	1	62589450	62589501	0	1
1	63151821	63152159	338	1	1	1	63151828	63152167	0	1
1	63705366	63708157	2791	1	1	1	63705367	63708157	1	1
1	66079154	66079448	294	0	1	1	66079154	66079448	0	0
1	66263909	66264246	337	1	1	1	66263910	66264243	0	1
1	67201222	67201555	333	1	1	1	67201222	67201554	1	1
1	68007994	68008851	857	0	1	1	68007994	68008851	0	0
1	69807004	69807324	320	1	1	1	69807004	69807322	1	1
1	69943725	69944032	307	1	1	1	69943725	69944031	1	1
1	70027325	70027683	358	1	1	1	70027324	70027680	1	1
1	70768127	70768451	324	1	1	1	70768113	70768436	1	1
1	70946205	70946537	332	1	1	1	70946191	70946522	1	1
1	71741332	71741643	311	1	1	1	71741321	71741631	1	1
1	72364590	72364677	87	0	1	1	72364590	72364677	0	0
1	72449622	72450034	412	1	1	1	72449623	72450034	1	0
1	72766324	72811841	45517	1	0	NA	NA	NA	1	0
1	73753607	73753923	316	1	1	1	73753607	73753922	1	1
1	74312432	74312684	252	1	1	1	74312432	74312683	1	1
1	74755170	74755292	122	1	1	1	74755170	74755291	1	1
1	755405	756525	1120	0	1	1	755405	756525	0	0
1	76011881	76012212	331	1	1	1	76011866	76012196	1	1
1	7602615	7602677	62	1	0	NA	NA	NA	0	1
1	76768729	76768808	79	1	1	1	76768730	76768808	1	1
1	77100375	77100659	284	1	1	1	77100376	77100659	1	1
1	7924953	7925120	167	0	1	0	7924953	7925120	0	0
1	79401526	79401849	323	1	1	1	79401527	79401849	1	1
1	80794958	80795034	76	0	1	1	80794958	80795034	0	0
1	81404773	81410949	6176	1	1	1	81404760	81410952	1	1
1	82085250	82085302	52	1	1	1	82085250	82085301	1	1
1	82963304	82963629	325	1	1	1	82963304	82963628	1	1
1	83042646	83042966	320	1	1	1	83042646	83042966	0	1
1	83125960	83127571	1611	0	1	1	83125960	83127571	0	0
1	83149852	83149911	59	1	1	1	83149853	83149911	1	1
1	83479212	83479302	90	1	1	1	83479252	83479341	0	1
1	85748634	85748965	331	1	1	1	85748634	85748964	1	1
1	86400853	86404539	3686	1	1	1	86400854	86404539	1	1
1	86405805	86406134	329	1	1	1	86405806	86406134	1	1
1	86740986	86741704	718	1	1	1	86740987	86741704	1	0
1	91624787	91625071	284	1	1	1	91624787	91625070	1	1
1	91914111	91914567	456	1	1	1	91914109	91914564	1	1
1	92132546	92132634	88	0	1	0	92132546	92132634	0	0
1	92232063	92233336	1273	1	1	1	92232063	92233335	1	0
1	92681353	92681406	53	1	1	1	92681354	92681406	1	1
1	94251467	94251781	314	1	1	1	94251464	94251777	1	1
1	95690524	95690844	320	1	1	1	95690525	95690844	1	1
1	96483123	96483175	52	0	1	1	96483123	96483175	0	0
1	96868781	96868870	89	1	0	NA	NA	NA	0	1
1	97596328	97596394	66	1	0	NA	NA	NA	0	1
1	99179944	99180052	108	1	1	1	99179944	99180051	1	1
1	99976021	99976085	64	1	0	NA	NA	NA	0	1
10	104528123	104528446	323	1	0	NA	NA	NA	0	1
10	104645255	104645593	338	1	1	1	104645257	104645596	0	1
10	10493419	10493743	324	1	1	1	10493419	10493742	1	1
10	106593338	106593417	79	1	1	1	106593338	106593416	1	1
10	107253002	107253356	354	1	1	1	107253002	107253355	1	0
10	107950684	107951598	914	1	1	1	107950684	107951597	1	0
10	108030321	108032546	2225	1	1	1	108030320	108032542	1	1
10	1092816	1093554	738	1	1	1	1092812	1093550	0	1
10	111572125	111578217	6092	1	1	1	111572124	111578230	1	1
10	113359006	113359059	53	1	1	1	113358992	113359044	1	1
10	11407736	11408276	540	0	1	0	11407736	11408276	0	0
10	11408467	11408647	180	0	1	0	11408467	11408647	0	0
10	114112183	114116661	4478	1	1	1	114112184	114116661	1	0
10	114157801	114158140	339	1	1	1	114157801	114158139	1	1
10	114199865	114199955	90	0	1	1	114199865	114199955	0	0
10	11484969	11485151	182	1	1	1	11484969	11485150	1	1
10	116343185	116343252	67	0	1	1	116343185	116343252	0	0
10	117711617	117712004	387	1	1	1	117711618	117712004	1	1
10	118265324	118265648	324	1	1	1	118265324	118265647	1	1
10	119468	120452	984	0	1	1	119468	120452	0	0
10	119634283	119634615	332	1	1	1	119634276	119634607	1	1
10	121046816	121046867	51	1	1	1	121046815	121046866	0	1
10	121153915	121154110	195	0	1	1	121153915	121154110	0	0
10	125378950	125379015	65	1	1	1	125378951	125379015	1	1
10	1260015	1260071	56	1	0	NA	NA	NA	0	1
10	1260057	1260114	57	1	1	1	1260058	1260114	1	0
10	128106485	128106800	315	1	1	1	128106475	128106789	1	1
10	129565313	129565620	307	1	1	1	129565306	129565612	1	1
10	130836871	130837275	404	1	1	1	130836872	130837275	1	1
10	132158635	132158959	324	0	1	1	132158635	132158959	0	0
10	132182187	132182315	128	1	1	1	132182187	132182315	0	1
10	132372181	132372327	146	1	1	1	132372180	132372325	1	1
10	13258022	13258335	313	1	1	0	13258022	13258334	1	1
10	13259251	13260742	1491	1	1	0	13259250	13260741	0	1
10	132635682	132636154	472	0	1	0	132635682	132636154	0	0
10	132842388	132842462	74	0	1	0	132842388	132842462	0	0
10	132858489	132858839	350	1	1	1	132858489	132858838	1	1
10	132988685	132990836	2151	0	1	0	132988685	132990836	0	0
10	133162046	133162100	54	1	0	NA	NA	NA	0	1
10	133162097	133162151	54	0	1	1	133162097	133162151	0	0
10	134709397	134709514	117	1	0	NA	NA	NA	0	1
10	134828584	134828639	55	1	0	NA	NA	NA	0	1
10	134828629	134828684	55	0	1	1	134828629	134828684	0	0
10	134831036	134831675	639	1	0	NA	NA	NA	1	0
10	134831037	134831313	276	0	1	0	134831037	134831313	0	0
10	135036054	135036444	390	0	1	0	135036054	135036444	0	0
10	135036572	135036692	120	0	1	0	135036572	135036692	0	0
10	135036840	135036928	88	0	1	0	135036840	135036928	0	0
10	135104753	135104876	123	1	0	NA	NA	NA	1	1
10	135104754	135105252	498	0	1	0	135104754	135105252	0	0
10	135104756	135105882	1126	1	0	NA	NA	NA	1	0
10	135105356	135105981	625	0	1	0	135105356	135105981	0	0
10	135182850	135182950	100	1	0	NA	NA	NA	0	1
10	135380341	135380412	71	1	0	NA	NA	NA	0	1
10	135499813	135499881	68	1	0	NA	NA	NA	0	1
10	135499873	135499928	55	0	1	1	135499873	135499928	0	0
10	1369200	1369382	182	0	1	0	1369200	1369382	0	0
10	1451851	1452305	454	1	0	NA	NA	NA	1	1
10	14750860	14750925	65	1	0	NA	NA	NA	0	1
10	14750927	14750992	65	0	1	1	14750927	14750992	0	0
10	14936359	14936677	318	1	1	1	14936350	14936667	1	1
10	15532477	15532788	311	1	1	1	15532476	15532786	1	1
10	1582733	1582817	84	0	1	1	1582733	1582817	0	0
10	1602635	1602749	114	1	1	1	1602661	1602776	0	1
10	18503076	18503591	515	1	1	1	18503077	18503591	1	1
10	19996553	19998010	1457	0	1	1	19996553	19998010	0	0
10	20667259	20667580	321	1	1	1	20667258	20667578	1	1
10	20824452	20824570	118	1	1	1	20824452	20824569	1	1
10	22798736	22798787	51	1	0	NA	NA	NA	1	0
10	2379486	2379814	328	1	1	1	2379483	2379810	1	1
10	24376838	24378442	1604	1	1	1	24376839	24378442	1	0
10	25035188	25035284	96	1	0	NA	NA	NA	0	1
10	25098089	25098428	339	1	1	1	25098089	25098427	1	1
10	2519719	2519786	67	1	1	1	2519719	2519786	0	1
10	2565231	2565381	150	1	0	NA	NA	NA	0	1
10	26767957	26768264	307	1	1	1	26767957	26768263	1	1
10	26999031	27002169	3138	0	1	1	26999031	27002169	0	0
10	28270201	28277767	7566	0	1	0	28270201	28277767	0	0
10	29712155	29712720	565	1	1	1	29712147	29712722	1	1
10	3095678	3095912	234	1	1	0	3095680	3095825	0	1
10	3095892	3096000	108	0	1	0	3095892	3096000	0	0
10	30966538	30966607	69	1	1	1	30966560	30966629	0	1
10	3103147	3103413	266	0	1	1	3103147	3103413	0	0
10	3103560	3103644	84	0	1	0	3103560	3103644	0	0
10	31246754	31251770	5016	1	1	1	31246753	31251768	1	0
10	3157572	3157666	94	0	1	1	3157572	3157666	0	0
10	32705737	32706076	339	1	1	1	32705727	32706065	1	1
10	33097541	33097601	60	1	1	1	33097542	33097601	1	1
10	3449202	3449253	51	1	0	NA	NA	NA	0	1
10	3449262	3449313	51	0	1	1	3449262	3449313	0	0
10	35439758	35439823	65	1	0	NA	NA	NA	0	1
10	35439821	35439886	65	0	1	1	35439821	35439886	0	0
10	35593222	35593553	331	1	1	1	35593222	35593552	1	1
10	35807467	35808091	624	0	1	1	35807467	35808091	0	0
10	36031788	36031852	64	1	1	1	36031790	36031865	0	1
10	36031821	36031898	77	1	1	1	36031790	36031865	1	0
10	37031533	37031584	51	1	0	NA	NA	NA	0	1
10	3721545	3721604	59	1	1	1	3721547	3721606	0	1
10	37357444	37357522	78	1	0	NA	NA	NA	0	1
10	38272000	38272158	158	1	1	1	38272000	38272157	1	0
10	38978829	38979030	201	0	1	1	38978829	38979030	0	0
10	4018519	4018579	60	0	1	1	4018519	4018579	0	0
10	42363879	42377356	13477	1	0	NA	NA	NA	1	0
10	42406545	42406630	85	0	1	0	42406545	42406630	0	0
10	42408112	42408283	171	1	0	NA	NA	NA	0	1
10	42423102	42423274	172	0	1	1	42423102	42423274	0	0
10	42458008	42458865	857	0	1	1	42458008	42458865	0	0
10	42662186	42662341	155	0	1	0	42662186	42662341	0	0
10	4290064	4291683	1619	1	1	1	4290063	4291683	1	0
10	43274211	43274544	333	1	1	1	43274211	43274543	1	1
10	44204937	44205525	588	0	1	0	44204937	44205525	0	0
10	44675236	44675329	93	1	1	1	44675236	44675328	1	1
10	44901305	44901611	306	1	1	1	44901310	44901618	0	1
10	45098184	45098246	62	0	1	1	45098184	45098246	0	0
10	4634811	4635131	320	1	1	1	4634803	4635122	1	1
10	4708520	4710521	2001	1	1	1	4708521	4710521	1	0
10	47088385	47088714	329	1	1	1	47088385	47088713	1	1
10	49917171	49917495	324	1	1	1	49917170	49917493	1	1
10	5248656	5248760	104	1	1	1	5248656	5248759	1	1
10	5287317	5293364	6047	1	1	1	5287301	5293347	1	1
10	53578486	53578816	330	1	1	1	53578476	53578805	1	1
10	54363971	54364053	82	0	1	1	54363971	54364053	0	0
10	54441209	54441527	318	1	1	1	54441199	54441516	1	1
10	54783544	54788831	5287	1	1	1	54783543	54788829	1	1
10	54860820	54861140	320	1	1	1	54860820	54861139	1	1
10	56181651	56181712	61	1	1	1	56181655	56181716	0	1
10	5644120	5644208	88	0	1	1	5644120	5644208	0	0
10	56682780	56684361	1581	1	1	1	56682780	56684360	1	0
10	5690303	5690382	79	1	1	1	5690292	5690371	0	1
10	58863550	58863870	320	1	1	1	58863550	58863869	1	1
10	5889561	5892819	3258	1	0	NA	NA	NA	1	1
10	59015226	59015569	343	1	1	1	59015226	59015568	1	1
10	59209796	59211849	2053	1	1	1	59209788	59211855	1	0
10	59256947	59257220	273	0	1	0	59256947	59257220	0	0
10	6073406	6073472	66	1	1	1	6073413	6073477	0	1
10	6097386	6097885	499	1	1	1	6097372	6097870	1	1
10	60978436	60978503	67	1	0	NA	NA	NA	0	1
10	61365494	61365814	320	1	1	1	61365494	61365813	1	1
10	61441574	61441636	62	0	1	1	61441574	61441636	0	0
10	61641784	61641980	196	0	1	1	61641784	61641980	0	0
10	6251960	6252916	956	0	1	1	6251960	6252916	0	0
10	6411580	6417647	6067	1	1	1	6411581	6417647	1	1
10	65509249	65511400	2151	0	1	1	65509249	65511400	0	0
10	66684460	66684535	75	1	0	NA	NA	NA	1	1
10	67032387	67032800	413	0	1	1	67032387	67032800	0	0
10	685343	685441	98	1	1	0	685342	685440	0	1
10	6877036	6877178	142	0	1	0	6877036	6877178	0	0
10	6877540	6877608	68	0	1	0	6877540	6877608	0	0
10	70576288	70577976	1688	0	1	1	70576288	70577976	0	0
10	70634338	70634451	113	1	1	1	70634338	70634450	1	1
10	70998124	70998448	324	1	1	1	70998124	70998447	1	1
10	73256582	73256703	121	1	1	1	73256583	73256703	1	0
10	73824658	73824962	304	1	0	NA	NA	NA	0	1
10	7671129	7671181	52	0	1	1	7671129	7671181	0	0
10	769344	769499	155	0	1	1	769344	769499	0	0
10	769907	769982	75	0	1	0	769907	769982	0	0
10	76991210	76992539	1329	0	1	1	76991210	76992539	0	0
10	7793814	7794035	221	1	1	1	7793820	7794041	0	1
10	78800911	78801231	320	1	1	1	78800911	78801230	1	1
10	81092183	81092781	598	1	1	1	81092192	81092781	1	1
10	81176907	81177141	234	1	1	1	81176907	81177140	1	1
10	81188149	81188229	80	1	1	1	81188148	81188228	0	1
10	81518204	81518269	65	0	1	1	81518204	81518269	0	0
10	81695855	81696011	156	1	1	1	81695856	81696011	1	1
10	822084	822141	57	1	0	NA	NA	NA	0	1
10	823233	823284	51	0	1	0	823233	823284	0	0
10	823366	823461	95	0	1	0	823366	823461	0	0
10	824297	824445	148	1	1	0	824289	824438	0	1
10	825606	825800	194	0	1	0	825606	825800	0	0
10	826055	826195	140	0	1	0	826055	826195	0	0
10	826303	826475	172	0	1	0	826303	826475	0	0
10	826535	826641	106	0	1	0	826535	826641	0	0
10	82904658	82904911	253	1	1	1	82904658	82904911	0	1
10	829745	830417	672	1	1	1	829779	830450	1	1
10	83130271	83130536	265	0	1	0	83130271	83130536	0	0
10	84237989	84238483	494	1	1	1	84237989	84238482	1	1
10	84400772	84400922	150	1	1	1	84400758	84400907	1	1
10	85626232	85626440	208	1	1	1	85626232	85626439	1	1
10	8781992	8782322	330	1	1	1	8781982	8782311	1	1
10	88511496	88511562	66	0	1	1	88511496	88511562	0	0
10	88666175	88666516	341	1	1	1	88666176	88666516	1	1
10	9097749	9097800	51	1	0	NA	NA	NA	1	0
10	91547399	91547736	337	1	1	1	91547400	91547736	1	1
10	92461859	92465628	3769	1	1	1	92461860	92465628	1	1
10	92969231	92969570	339	1	1	1	92969231	92969569	1	1
10	94134600	94137654	3054	1	1	1	94134603	94137654	1	1
10	9436189	9436252	63	1	1	1	9436190	9436252	1	1
10	9438174	9438342	168	1	1	1	9438233	9438401	0	1
10	9519828	9520135	307	1	1	1	9519821	9520127	1	1
10	95545478	95546496	1018	1	1	1	95545478	95546491	1	0
10	96251544	96251721	177	1	1	1	96251544	96251720	1	1
10	99034873	99037408	2535	1	1	1	99034865	99037399	1	1
11	100438652	100438798	146	1	1	1	100438653	100438798	1	1
11	101416784	101417115	331	1	1	1	101416778	101417108	1	1
11	102471858	102472175	317	1	1	1	102471856	102472172	1	1
11	10292746	10293853	1107	1	1	1	10292746	10293852	1	0
11	103410831	103411145	314	1	1	1	103410823	103411136	1	1
11	104010483	104010828	345	1	1	1	104010475	104010819	1	1
11	104180394	104180738	344	1	1	1	104180389	104180732	1	1
11	104267751	104273233	5482	1	1	1	104267749	104273230	1	0
11	105723493	105723824	331	1	1	1	105723493	105723823	1	1
11	106160516	106160624	108	0	1	1	106160516	106160624	0	0
11	106595866	106596169	303	1	1	1	106595870	106596167	0	1
11	109930921	109930997	76	1	1	1	109930921	109930996	1	1
11	109976712	109977039	327	1	1	1	109976712	109977038	1	1
11	112617746	112618150	404	0	1	1	112617746	112618150	0	0
11	11379621	11381031	1410	1	1	1	11379621	11381030	1	0
11	1142021	1142088	67	0	1	1	1142021	1142088	0	0
11	115665936	115665988	52	1	0	NA	NA	NA	0	1
11	117967537	117967661	124	1	0	NA	NA	NA	0	1
11	117967614	117967700	86	0	1	1	117967614	117967700	0	0
11	118226497	118226563	66	1	0	NA	NA	NA	0	1
11	121636425	121636477	52	0	1	1	121636425	121636477	0	0
11	122347584	122349289	1705	1	1	1	122347579	122349283	1	1
11	122999078	122999133	55	1	1	1	122999079	122999132	1	1
11	123230021	123230078	57	1	1	1	123230022	123230078	1	0
11	124830140	124830248	108	1	1	1	124830140	124830248	0	1
11	125719441	125719596	155	1	1	1	125719441	125719595	1	1
11	131468652	131468793	141	0	1	0	131468652	131468793	0	0
11	133962906	133963539	633	0	1	0	133962906	133963539	0	0
11	133963737	133963797	60	0	1	0	133963737	133963797	0	0
11	133964519	133964579	60	0	1	1	133964519	133964579	0	0
11	134359291	134359553	262	1	0	NA	NA	NA	0	1
11	134362434	134365447	3013	1	1	1	134362435	134365447	1	0
11	134431776	134431831	55	1	1	1	134431775	134431830	0	1
11	134445857	134445918	61	1	0	NA	NA	NA	0	1
11	134445911	134445972	61	0	1	1	134445911	134445972	0	0
11	13565937	13566291	354	0	1	1	13565937	13566291	0	0
11	13767507	13767592	85	0	1	1	13767507	13767592	0	0
11	14348325	14348642	317	1	1	1	14348312	14348628	1	1
11	16587164	16587301	137	1	1	1	16587163	16587299	1	1
11	16597578	16597902	324	1	1	1	16597579	16597900	1	1
11	1662955	1663537	582	1	1	1	1662956	1663537	1	1
11	1663413	1663537	124	1	0	NA	NA	NA	1	0
11	16905550	16905604	54	1	1	1	16905550	16905603	1	1
11	1705686	1705738	52	0	1	0	1705686	1705738	0	0
11	1706019	1706173	154	0	1	0	1706019	1706173	0	0
11	17946814	17946893	79	0	1	1	17946814	17946893	0	0
11	18165200	18165287	87	1	1	1	18165199	18165286	0	1
11	1971844	1971961	117	1	0	NA	NA	NA	0	1
11	21789090	21789152	62	1	1	1	21789071	21789132	1	1
11	2215315	2215569	254	0	1	1	2215315	2215569	0	0
11	223788	224004	216	1	1	1	223850	224066	0	1
11	22438811	22438867	56	0	1	1	22438811	22438867	0	0
11	23860744	23860889	145	1	1	1	23860745	23860889	1	0
11	2406835	2406897	62	1	0	NA	NA	NA	0	1
11	25564472	25564813	341	1	1	1	25564476	25564817	0	1
11	25680028	25680082	54	1	1	1	25680027	25680081	0	1
11	25773074	25773211	137	0	1	1	25773074	25773211	0	0
11	25923679	25923750	71	0	1	1	25923679	25923750	0	0
11	27657263	27657596	333	1	1	1	27657264	27657596	1	1
11	28709956	28710019	63	0	1	1	28709956	28710019	0	0
11	321432	321744	312	0	1	0	321432	321744	0	0
11	32286653	32286987	334	1	1	1	32286641	32286974	1	1
11	33537687	33538011	324	1	1	1	33537686	33538009	1	1
11	33659951	33660012	61	1	1	1	33659952	33660012	1	1
11	34047896	34047948	52	1	1	0	34047902	34047954	0	1
11	363220	363310	90	1	0	NA	NA	NA	0	1
11	36778048	36778356	308	0	1	1	36778048	36778356	0	0
11	37121338	37121400	62	1	1	1	37121331	37121394	0	1
11	37448817	37448910	93	1	1	1	37448817	37448909	1	1
11	37618516	37618585	69	0	1	0	37618516	37618585	0	0
11	37666634	37666941	307	1	1	1	37666647	37666954	0	1
11	39010742	39010809	67	1	1	1	39010740	39010805	1	1
11	39785907	39785976	69	1	1	1	39785906	39785975	0	1
11	39805127	39805463	336	1	1	1	39805116	39805451	1	1
11	41007032	41007355	323	1	1	1	41007020	41007342	1	1
11	43891844	43892181	337	1	1	1	43891834	43892170	1	1
11	43909626	43909933	307	1	1	1	43909626	43909932	1	1
11	44523363	44523415	52	1	0	NA	NA	NA	0	1
11	44523418	44523472	54	1	1	1	44523414	44523466	1	0
11	44743178	44743231	53	1	0	NA	NA	NA	0	1
11	44743213	44743267	54	1	1	1	44743215	44743266	1	0
11	45429849	45431617	1768	1	1	1	45429850	45431617	1	0
11	46036248	46036596	348	1	1	1	46036248	46036595	1	1
11	47887668	47888195	527	1	1	1	47887669	47888195	1	1
11	4802535	4802847	312	1	1	1	4802522	4802833	1	1
11	48120071	48120381	310	1	1	1	48120063	48120372	1	1
11	48220914	48221007	93	0	1	1	48220914	48221007	0	0
11	48347604	48347791	187	1	0	NA	NA	NA	0	1
11	48351641	48352142	501	1	0	NA	NA	NA	0	1
11	48354563	48354915	352	1	0	NA	NA	NA	0	1
11	48367529	48373710	6181	0	1	1	48367529	48373710	0	0
11	48446816	48447115	299	1	0	NA	NA	NA	0	1
11	48600858	48604285	3427	1	1	1	48600857	48604283	1	0
11	48690018	48690188	170	1	1	1	48690004	48690173	1	1
11	48865406	48865580	174	1	0	NA	NA	NA	0	1
11	48880772	48881797	1025	0	1	1	48880772	48881797	0	0
11	48928948	48929260	312	1	0	NA	NA	NA	1	1
11	48948699	48949217	518	1	0	NA	NA	NA	0	1
11	49425097	49425433	336	1	1	1	49425082	49425417	1	1
11	49711861	49711959	98	0	1	1	49711861	49711959	0	0
11	50728928	50729949	1021	1	0	NA	NA	NA	0	1
11	50752959	50753130	171	1	0	NA	NA	NA	0	1
11	5106961	5107212	251	1	1	1	5106966	5107213	0	1
11	51125540	51132275	6735	0	1	1	51125540	51132275	0	0
11	54752759	54759494	6735	0	1	1	54752759	54759494	0	0
11	54894953	54899790	4837	0	1	1	54894953	54899790	0	0
11	54951641	54982948	31307	1	0	NA	NA	NA	1	0
11	55031603	55038545	6942	1	0	NA	NA	NA	1	0
11	576748	576862	114	1	0	NA	NA	NA	0	1
11	58220624	58220952	328	1	1	1	58220605	58220933	1	1
11	60851846	60853909	2063	1	1	1	60851846	60853908	1	1
11	61107800	61108140	340	1	1	1	61107800	61108139	1	1
11	61944787	61945086	299	1	1	1	61944788	61945086	1	1
11	64268441	64268502	61	1	1	1	64268440	64268500	1	1
11	6600866	6601077	211	1	1	1	6600867	6601077	1	0
11	66227572	66227896	324	1	0	NA	NA	NA	0	1
11	6709973	6710035	62	0	1	1	6709973	6710035	0	0
11	67662498	67662577	79	1	1	0	67662508	67662588	0	1
11	677347	677801	454	1	0	NA	NA	NA	1	0
11	68183095	68183405	310	1	1	1	68183094	68183404	0	1
11	68434797	68434851	54	1	0	NA	NA	NA	0	1
11	68797617	68797718	101	1	1	1	68797618	68797718	1	1
11	70040342	70040444	102	0	1	0	70040342	70040444	0	0
11	70040564	70040642	78	0	1	0	70040564	70040642	0	0
11	71233057	71233127	70	1	1	1	71233057	71233127	0	1
11	71861609	71861925	316	1	0	NA	NA	NA	1	1
11	74145071	74145419	348	1	1	1	74145071	74145418	1	1
11	74532423	74532743	320	1	1	1	74532423	74532742	1	1
11	76430116	76430190	74	0	1	1	76430116	76430190	0	0
11	7716915	7717232	317	1	1	1	7716916	7717232	1	1
11	80944955	80945013	58	0	1	1	80944955	80945013	0	0
11	8326068	8326207	139	1	1	1	8326061	8326199	1	1
11	86964688	86964741	53	1	1	1	86964675	86964727	1	1
11	88769792	88769846	54	1	1	1	88769808	88769862	0	1
11	89495700	89507183	11483	0	1	1	89495700	89507183	0	0
11	89620397	89626400	6003	0	1	1	89620397	89626400	0	0
11	89684475	89690478	6003	0	1	1	89684475	89690478	0	0
11	89932522	89932862	340	1	1	1	89932515	89932854	1	1
11	9062055	9062115	60	1	0	NA	NA	NA	0	1
11	91781377	91781438	61	0	1	1	91781377	91781438	0	0
11	92869804	92875869	6065	1	1	1	92869804	92875868	1	1
11	92875448	92875851	403	1	0	NA	NA	NA	1	0
11	93021140	93022161	1021	1	1	1	93021140	93022160	1	0
11	93102815	93103134	319	1	1	1	93102816	93103135	1	1
11	93154149	93160210	6061	1	0	NA	NA	NA	0	1
11	9338352	9338622	270	1	1	1	9338353	9338622	1	1
11	95169380	95175433	6053	1	1	1	95169380	95175433	1	1
11	9605303	9605365	62	1	0	NA	NA	NA	0	1
11	96233132	96233445	313	1	1	1	96233122	96233434	1	1
11	96614773	96615101	328	1	1	1	96614773	96615100	1	1
11	97131922	97132011	89	1	1	1	97131930	97132026	0	1
11	97172222	97172968	746	1	1	1	97172218	97172954	1	1
11	98248208	98248603	395	1	1	1	98248205	98248599	1	0
11	99276338	99276679	341	1	1	1	99276328	99276668	1	1
12	1028823	1029629	806	0	1	1	1028823	1029629	0	0
12	10678741	10678793	52	1	1	1	10678742	10678793	1	1
12	11258537	11258852	315	1	0	NA	NA	NA	1	1
12	11288105	11288159	54	1	1	1	11288105	11288158	1	1
12	113071990	113072199	209	1	0	NA	NA	NA	0	1
12	11341901	11342216	315	1	1	1	11341902	11342216	1	1
12	115023768	115023832	64	1	1	1	115023767	115023830	1	1
12	117085008	117085102	94	1	0	NA	NA	NA	0	1
12	117640972	117643554	2582	1	1	1	117640973	117643554	1	0
12	1197737	1197799	62	0	1	1	1197737	1197799	0	0
12	1197872	1197933	61	0	1	1	1197872	1197933	0	0
12	1198984	1199046	62	0	1	1	1198984	1199046	0	0
12	1199114	1199176	62	0	1	0	1199114	1199176	0	0
12	1199504	1199566	62	0	1	1	1199504	1199566	0	0
12	1199624	1199686	62	0	1	1	1199624	1199686	0	0
12	1199743	1199805	62	0	1	1	1199743	1199805	0	0
12	1199894	1199956	62	0	1	1	1199894	1199956	0	0
12	12026416	12027154	738	1	1	0	12026416	12027154	1	0
12	122289596	122289942	346	1	1	1	122289596	122289941	1	1
12	122947417	122947468	51	1	0	NA	NA	NA	1	0
12	123010346	123010676	330	1	1	1	123010340	123010669	1	1
12	125334399	125334708	309	1	1	1	125334399	125334709	0	1
12	125433294	125433415	121	0	1	1	125433294	125433415	0	0
12	126019198	126019254	56	1	0	NA	NA	NA	0	1
12	126019238	126019294	56	0	1	1	126019238	126019294	0	0
12	126664977	126665051	74	0	1	0	126664977	126665051	0	0
12	126665497	126665605	108	0	1	0	126665497	126665605	0	0
12	126905116	126905431	315	1	1	1	126905116	126905430	1	1
12	127199963	127200303	340	1	1	1	127199962	127200301	1	1
12	127660442	127660769	327	1	1	1	127660442	127660768	1	1
12	127947268	127947321	53	1	1	1	127947268	127947320	1	1
12	128181072	128181200	128	1	0	NA	NA	NA	0	1
12	128673971	128674066	95	0	1	1	128673971	128674066	0	0
12	129331242	129331295	53	1	0	NA	NA	NA	0	1
12	129456301	129456414	113	0	1	1	129456301	129456414	0	0
12	129872677	129873009	332	0	1	1	129872677	129873009	0	0
12	130060303	130060635	332	1	1	1	130060304	130060635	1	1
12	130283243	130283295	52	1	1	1	130283243	130283295	0	1
12	130409173	130409283	110	1	0	NA	NA	NA	0	1
12	130575347	130575485	138	1	1	1	130575408	130575551	0	1
12	130877996	130878055	59	1	1	1	130878000	130878059	0	1
12	131131938	131133870	1932	1	1	1	131131937	131133868	1	0
12	131142174	131142248	74	1	0	NA	NA	NA	0	1
12	131504370	131504425	55	0	1	0	131504370	131504425	0	0
12	131504567	131504652	85	0	1	0	131504567	131504652	0	0
12	131762776	131762866	90	0	1	1	131762776	131762866	0	0
12	131851386	131851711	325	0	1	0	131851386	131851711	0	0
12	131851569	131852000	431	1	0	NA	NA	NA	0	1
12	131851854	131852016	162	0	1	0	131851854	131852016	0	0
12	132170835	132170944	109	0	1	1	132170835	132170944	0	0
12	132171086	132171194	108	0	1	0	132171086	132171194	0	0
12	132285982	132286071	89	1	1	1	132285972	132286071	0	1
12	132697676	132697795	119	0	1	0	132697676	132697795	0	0
12	132867757	132867967	210	0	1	0	132867757	132867967	0	0
12	132868218	132868278	60	0	1	0	132868218	132868278	0	0
12	132880516	132880836	320	1	1	0	132880516	132880953	0	1
12	132957830	132957916	86	0	1	0	132957830	132957916	0	0
12	132969105	132969191	86	0	1	1	132969105	132969191	0	0
12	132987034	132987459	425	1	1	0	132987035	132987459	1	1
12	132987532	132987743	211	0	1	0	132987532	132987743	0	0
12	132987538	132988597	1059	0	1	0	132987538	132988597	0	0
12	132989498	132989654	156	0	1	0	132989498	132989654	0	0
12	133046245	133046326	81	0	1	1	133046245	133046326	0	0
12	133141206	133141341	135	0	1	0	133141206	133141341	0	0
12	133197451	133197512	61	1	0	NA	NA	NA	0	1
12	133306930	133306994	64	1	0	NA	NA	NA	0	1
12	133306963	133307027	64	1	1	0	133306964	133307027	1	0
12	14258620	14258952	332	1	1	1	14258620	14258951	1	1
12	1437992	1438613	621	1	1	1	1437992	1438612	1	0
12	16358494	16358566	72	0	1	1	16358494	16358566	0	0
12	16420127	16421287	1160	1	1	1	16420125	16421284	1	0
12	17444827	17445940	1113	1	1	1	17444826	17445938	1	0
12	17894170	17894398	228	1	1	1	17894170	17894397	1	1
12	20862534	20862873	339	1	1	1	20862522	20862860	1	1
12	21775428	21775748	320	1	0	NA	NA	NA	1	1
12	22047475	22047578	103	1	1	1	22047475	22047577	1	1
12	2215434	2215488	54	1	0	NA	NA	NA	0	1
12	2241178	2258000	16822	0	1	1	2241178	2258000	0	0
12	23795726	23796043	317	1	1	1	23795740	23796053	0	1
12	240154	240210	56	1	1	1	240154	240210	0	1
12	24160483	24160715	232	0	1	0	24160483	24160715	0	0
12	24460391	24460685	294	1	1	1	24460425	24460723	0	1
12	25670023	25670493	470	0	1	1	25670023	25670493	0	0
12	26511037	26511370	333	1	1	1	26511037	26511369	1	1
12	27434003	27434335	332	1	1	1	27434003	27434334	1	1
12	29573420	29573762	342	1	1	1	29573410	29573751	1	1
12	30371317	30371743	426	1	1	1	30371318	30371743	1	1
12	31272913	31272988	75	0	1	0	31272913	31272988	0	0
12	31273255	31273348	93	0	1	1	31273255	31273348	0	0
12	32963615	32963931	316	1	1	1	32963615	32963930	1	1
12	34256036	34267097	11061	1	1	1	34256035	34267095	1	0
12	34313161	34313267	106	0	1	1	34313161	34313267	0	0
12	34586930	34587021	91	1	1	1	34586931	34587021	1	0
12	34632677	34632819	142	1	0	NA	NA	NA	1	0
12	38016756	38017952	1196	1	0	NA	NA	NA	0	1
12	38044660	38044829	169	1	0	NA	NA	NA	0	1
12	38125396	38125739	343	1	0	NA	NA	NA	0	1
12	40864970	40865093	123	1	1	1	40864971	40865093	1	1
12	41143350	41143608	258	1	1	1	41143350	41143607	1	0
12	41183196	41183503	307	1	1	1	41183196	41183502	1	0
12	41659831	41660149	318	1	1	1	41659831	41660148	1	1
12	41757437	41757526	89	1	1	1	41757438	41757526	1	1
12	43654406	43654742	336	1	1	1	43654419	43654755	0	1
12	43977460	43979561	2101	1	1	1	43977451	43979551	1	1
12	45903153	45909940	6787	1	1	1	45903154	45909940	1	1
12	47075366	47075715	349	1	1	1	47075364	47075712	1	1
12	47609588	47609660	72	1	1	1	47609587	47609658	1	1
12	49470013	49470494	481	1	0	NA	NA	NA	1	1
12	5321087	5321233	146	1	0	NA	NA	NA	0	1
12	54245422	54245712	290	1	1	1	54245422	54245711	1	1
12	56835880	56835974	94	1	1	1	56835886	56835979	0	1
12	6038081	6038155	74	0	1	1	6038081	6038155	0	0
12	6290301	6290557	256	1	0	NA	NA	NA	1	0
12	6290424	6290485	61	0	1	1	6290424	6290485	0	0
12	63946732	63946960	228	1	1	1	63946731	63946958	1	0
12	63950205	63950289	84	0	1	0	63950205	63950289	0	0
12	6538393	6538775	382	1	0	NA	NA	NA	1	1
12	66451374	66451444	70	1	0	NA	NA	NA	0	1
12	66678528	66678605	77	1	1	1	66678526	66678602	1	1
12	6907384	6907641	257	1	1	1	6907384	6907640	1	1
12	71602361	71604478	2117	1	1	1	71602361	71604477	1	0
12	72356641	72358206	1565	0	1	1	72356641	72358206	0	0
12	74964927	74965037	110	1	1	1	74964927	74965042	1	1
12	7822645	7824323	1678	1	1	1	7822645	7824323	0	1
12	7832830	7832955	125	1	1	1	7832831	7832955	1	1
12	7858945	7859090	145	1	1	1	7858946	7859090	1	1
12	7968678	7969016	338	1	0	NA	NA	NA	1	1
12	7977848	7978148	300	1	1	1	7977835	7978153	0	1
12	83331526	83331581	55	1	0	NA	NA	NA	1	0
12	8381340	8381394	54	0	1	0	8381340	8381394	0	0
12	83844060	83844625	565	1	1	1	83844060	83844624	1	1
12	83959230	83959547	317	1	1	1	83959231	83959547	1	1
12	84484485	84484805	320	1	1	1	84484491	84484807	0	1
12	8558486	8568228	9742	1	0	NA	NA	NA	1	0
12	86523325	86523646	321	1	0	NA	NA	NA	1	1
12	87208022	87208134	112	1	0	NA	NA	NA	0	1
12	87249834	87249972	138	1	0	NA	NA	NA	0	1
12	87879569	87879673	104	0	1	0	87879569	87879673	0	0
12	87879898	87880002	104	0	1	0	87879898	87880002	0	0
12	9016884	9017909	1025	0	1	1	9016884	9017909	0	0
12	90846389	90846594	205	1	1	1	90846389	90846593	1	1
12	91991280	91991340	60	1	0	NA	NA	NA	0	1
12	92099744	92099795	51	0	1	1	92099744	92099795	0	0
12	93619741	93619798	57	0	1	1	93619741	93619798	0	0
12	95244026	95244450	424	1	1	1	95244027	95244451	1	1
12	95344058	95344368	310	1	1	1	95344058	95344368	0	1
12	95387022	95387145	123	1	0	NA	NA	NA	0	1
12	9555267	9558446	3179	1	0	NA	NA	NA	1	0
12	9557833	9558376	543	0	1	0	9557833	9558376	0	0
12	9620628	9620698	70	1	0	NA	NA	NA	0	1
12	96340355	96342965	2610	1	1	1	96340347	96342956	1	1
12	97058533	97058603	70	0	1	1	97058533	97058603	0	0
12	97554741	97555070	329	1	1	1	97554729	97555057	1	1
12	98015592	98015652	60	1	1	1	98015586	98015667	0	1
13	101625775	101625873	98	1	1	1	101625794	101625892	0	1
13	102813916	102814004	88	1	0	NA	NA	NA	0	1
13	102813967	102814061	94	0	1	1	102813967	102814061	0	0
13	103875493	103875571	78	1	1	1	103875494	103875571	1	1
13	103931652	103931968	316	1	1	1	103931645	103931960	1	1
13	104091765	104092248	483	1	1	1	104091765	104092247	1	0
13	104144390	104144674	284	1	1	1	104144390	104144673	1	1
13	105161221	105161536	315	1	1	1	105161222	105161536	1	1
13	105708092	105708436	344	1	1	1	105708093	105708437	0	1
13	107924549	107924873	324	1	1	1	107924549	107924872	1	1
13	108603781	108603846	65	0	1	1	108603781	108603846	0	0
13	108947024	108951811	4787	1	1	0	108947028	108951546	1	1
13	108951559	108951632	73	0	1	0	108951559	108951632	0	0
13	108951643	108951808	165	0	1	0	108951643	108951808	0	0
13	109267192	109267255	63	1	1	1	109267191	109267253	1	1
13	109361748	109362441	693	1	1	1	109361746	109362439	1	0
13	110418912	110419010	98	0	1	1	110418912	110419010	0	0
13	110905654	110905709	55	0	1	1	110905654	110905709	0	0
13	111061170	111061349	179	0	1	1	111061170	111061349	0	0
13	111148871	111149043	172	0	1	1	111148871	111149043	0	0
13	111559428	111559667	239	1	1	1	111559417	111559655	1	1
13	111704429	111704535	106	0	1	0	111704429	111704535	0	0
13	111704715	111704984	269	0	1	0	111704715	111704984	0	0
13	112614359	112614412	53	1	1	1	112614373	112614425	0	1
13	112850835	112851182	347	1	1	0	112850859	112851206	0	1
13	113426840	113426894	54	1	1	1	113426862	113426916	0	1
13	113616387	113616448	61	1	1	1	113616376	113616436	1	1
13	113680386	113680440	54	1	0	NA	NA	NA	0	1
13	113790939	113791271	332	1	1	1	113790951	113791278	0	1
13	113991070	113991141	71	1	1	1	113991077	113991144	1	1
13	114000938	114000996	58	1	0	NA	NA	NA	0	1
13	114263925	114263987	62	1	1	1	114263925	114263987	0	1
13	114531973	114532203	230	0	1	0	114531973	114532203	0	0
13	114764515	114764596	81	1	0	NA	NA	NA	1	1
13	114795859	114795949	90	0	1	1	114795859	114795949	0	0
13	114840921	114840975	54	1	0	NA	NA	NA	0	1
13	114840948	114841003	55	0	1	0	114840948	114841003	0	0
13	19649453	19649544	91	1	0	NA	NA	NA	0	1
13	19977769	19977825	56	0	1	1	19977769	19977825	0	0
13	21730917	21731240	323	1	1	1	21730903	21731225	1	1
13	22317482	22317549	67	1	0	NA	NA	NA	0	1
13	22317541	22317607	66	0	1	1	22317541	22317607	0	0
13	23055219	23055527	308	1	1	1	23055219	23055526	1	1
13	24057656	24057989	333	1	1	1	24057656	24057988	1	1
13	24710967	24711282	315	1	1	1	24710956	24711270	1	1
13	25645195	25645514	319	1	1	1	25645188	25645507	0	1
13	25721019	25721338	319	1	1	1	25721019	25721338	0	1
13	25945506	25945574	68	0	1	1	25945506	25945574	0	0
13	26724061	26724142	81	0	1	1	26724061	26724142	0	0
13	28839866	28840192	326	1	1	1	28839864	28840189	1	1
13	29891572	29891884	312	1	1	1	29891567	29891878	1	1
13	29963903	29963989	86	0	1	0	29963903	29963989	0	0
13	29964157	29964209	52	0	1	0	29964157	29964209	0	0
13	30215837	30221859	6022	1	1	1	30215824	30221845	1	1
13	30578134	30578205	71	0	1	1	30578134	30578205	0	0
13	31175600	31175936	336	1	1	1	31175599	31175934	1	1
13	31417797	31417892	95	1	1	0	31417786	31417881	0	1
13	31418220	31418490	270	1	1	0	31418221	31418488	1	1
13	35558637	35564880	6243	1	1	1	35558637	35564879	1	1
13	36438420	36438739	319	1	1	1	36438406	36438724	1	1
13	36818936	36818998	62	1	1	1	36818916	36818977	1	1
13	39276702	39276760	58	1	0	NA	NA	NA	0	1
13	39276757	39276816	59	1	1	1	39276739	39276797	1	0
13	39934188	39935487	1299	1	1	1	39934188	39935486	1	0
13	41453838	41453891	53	1	1	1	41453837	41453889	1	1
13	42002179	42002261	82	0	1	1	42002179	42002261	0	0
13	42755958	42756211	253	1	1	1	42755954	42756206	0	1
13	42946049	42946380	331	1	1	1	42946064	42946395	0	1
13	43539809	43541463	1654	1	1	1	43539809	43541462	1	0
13	45952086	45952166	80	0	1	1	45952086	45952166	0	0
13	46005387	46005725	338	1	1	1	46005388	46005725	1	1
13	46719762	46720089	327	1	1	1	46719761	46720087	1	1
13	47034863	47035322	459	0	1	0	47034863	47035322	0	0
13	47038770	47039041	271	0	1	0	47038770	47039041	0	0
13	47089638	47089721	83	1	0	NA	NA	NA	0	1
13	47689490	47689805	315	1	1	1	47689486	47689800	1	1
13	48015696	48015800	104	1	1	1	48015696	48015800	0	1
13	48419934	48420091	157	1	1	1	48419926	48420083	1	1
13	49305734	49305798	64	1	1	1	49305733	49305797	0	1
13	49892599	49892658	59	0	1	1	49892599	49892658	0	0
13	50474690	50474753	63	1	1	1	50474704	50474767	0	1
13	51069350	51075083	5733	1	1	1	51069351	51075083	1	1
13	51551936	51552266	330	1	1	1	51551936	51552265	0	1
13	51851907	51851994	87	1	1	1	51851908	51851994	1	0
13	53281436	53281549	113	1	1	1	53281483	53281595	0	1
13	57975515	57975864	349	1	1	1	57975515	57975863	1	1
13	58528928	58528986	58	1	1	1	58528933	58528990	0	1
13	58589145	58599796	10651	1	1	1	58589148	58599799	1	0
13	60172499	60172833	334	1	1	1	60172492	60172825	1	1
13	61958693	61959021	328	0	1	1	61958693	61959021	0	0
13	63523816	63524133	317	1	1	1	63523816	63524132	1	1
13	63566263	63566332	69	0	1	1	63566263	63566332	0	0
13	63624528	63624652	124	0	1	0	63624528	63624652	0	0
13	63631797	63631866	69	0	1	0	63631797	63631866	0	0
13	65637808	65638211	403	1	1	1	65637809	65638211	1	0
13	67174780	67177423	2643	1	1	1	67174781	67177423	1	0
13	67950544	67950596	52	1	1	1	67950544	67950596	0	1
13	68132436	68132496	60	1	1	1	68132437	68132496	1	1
13	68936890	68937267	377	1	1	1	68936891	68937267	1	1
13	69966667	69966967	300	1	1	1	69966667	69966966	1	1
13	70036395	70036724	329	1	1	1	70036394	70036720	0	1
13	70079644	70079698	54	1	1	1	70079643	70079697	0	1
13	72386671	72386722	51	1	0	NA	NA	NA	1	0
13	72390731	72390810	79	0	1	1	72390731	72390810	0	0
13	72477265	72480578	3313	1	1	1	72477266	72480578	1	0
13	72843039	72846918	3879	1	1	1	72843037	72846922	1	1
13	72956726	72957035	309	0	1	1	72956726	72957035	0	0
13	74074921	74075250	329	1	1	1	74074913	74075241	1	1
13	75625199	75625278	79	1	1	1	75625200	75625278	1	1
13	79757407	79757463	56	1	1	1	79757407	79757463	0	1
13	80081407	80081724	317	1	1	1	80081394	80081710	1	1
13	81747255	81747584	329	1	1	1	81747239	81747567	1	1
13	82355643	82355698	55	1	0	NA	NA	NA	0	1
13	82889212	82889556	344	1	1	1	82889212	82889555	1	1
13	83056050	83056106	56	0	1	1	83056050	83056106	0	0
13	83179462	83179770	308	1	1	1	83179449	83179756	1	1
13	83203238	83203298	60	1	0	NA	NA	NA	0	1
13	83949293	83949517	224	1	1	1	83949282	83949505	1	1
13	86600653	86600711	58	1	1	1	86600637	86600694	1	0
13	87341745	87341803	58	1	1	1	87341745	87341803	0	1
13	89003265	89003602	337	1	1	1	89003266	89003602	0	1
13	89253470	89253798	328	1	1	1	89253467	89253794	1	1
13	90862856	90864806	1950	1	1	1	90862854	90864809	1	0
13	91160040	91160289	249	1	1	1	91160043	91160292	0	1
13	92224081	92224169	88	1	0	NA	NA	NA	1	0
13	92279250	92279584	334	1	1	1	92279260	92279594	0	1
13	93555563	93555620	57	1	1	1	93555562	93555619	0	1
13	94328370	94328423	53	1	1	1	94328369	94328434	0	1
13	95339334	95339408	74	0	1	1	95339334	95339408	0	0
13	96633436	96633755	319	1	1	1	96633424	96633742	1	1
13	98721250	98721571	321	1	1	1	98721238	98721558	1	1
13	99623714	99623850	136	1	1	1	99623709	99623845	1	1
14	100845014	100845348	334	1	1	1	100844999	100845332	1	1
14	101662864	101662920	56	1	1	1	101662877	101662933	0	1
14	101990876	101991213	337	1	1	1	101990868	101991204	1	1
14	103598345	103598406	61	1	1	1	103598321	103598381	1	1
14	103764022	103764127	105	1	1	1	103764022	103764126	1	0
14	104791420	104791769	349	0	1	1	104791420	104791769	0	0
14	105293177	105293364	187	1	1	1	105293176	105293362	1	1
14	106030005	106030137	132	0	1	0	106030005	106030137	0	0
14	106041662	106041786	124	1	0	NA	NA	NA	0	1
14	106084107	106084163	56	1	0	NA	NA	NA	0	1
14	106211121	106211465	344	0	1	0	106211121	106211465	0	0
14	106323457	106323521	64	1	1	1	106323461	106323525	0	1
14	106415145	106415236	91	1	1	1	106415146	106415236	1	1
14	106465570	106465690	120	1	1	0	106465553	106465692	0	1
14	106598476	106598533	57	1	1	1	106598501	106598562	0	1
14	106929337	106929407	70	1	1	1	106929357	106929435	0	1
14	106986877	106986938	61	1	1	1	106986862	106986922	1	1
14	19602446	19602878	432	1	0	NA	NA	NA	0	1
14	20085578	20085865	287	0	1	1	20085578	20085865	0	0
14	20217906	20217983	77	0	1	0	20217906	20217983	0	0
14	20973904	20974060	156	1	0	NA	NA	NA	0	1
14	21536151	21536479	328	1	1	1	21536134	21536460	1	1
14	21895526	21895607	81	1	0	NA	NA	NA	0	1
14	22029960	22031608	1648	1	1	1	22029960	22031607	1	0
14	22105400	22105472	72	1	0	NA	NA	NA	0	1
14	22774835	22775369	534	1	1	1	22774836	22775369	1	1
14	22881667	22882261	594	1	1	1	22881668	22882261	1	1
14	24175029	24175362	333	1	1	1	24175029	24175361	1	1
14	24394524	24394577	53	1	0	NA	NA	NA	0	1
14	24394553	24394606	53	0	1	1	24394553	24394606	0	0
14	24932619	24932784	165	1	1	1	24932620	24932784	1	1
14	25759619	25759671	52	1	0	NA	NA	NA	1	0
14	26701618	26701930	312	1	1	1	26701617	26701928	1	1
14	30170172	30170226	54	0	1	1	30170172	30170226	0	0
14	30986514	30986762	248	1	1	1	30986512	30986759	1	0
14	31263000	31263331	331	1	1	1	31263000	31263330	1	1
14	31813878	31814053	175	1	1	1	31813878	31814052	1	1
14	31943009	31943335	326	1	1	1	31943010	31943335	1	1
14	32953305	32954360	1055	1	1	1	32953305	32954341	1	1
14	33391973	33392307	334	1	1	1	33391974	33392307	1	1
14	34290037	34290376	339	1	1	1	34290038	34290377	0	1
14	34881328	34881636	308	1	0	NA	NA	NA	0	1
14	35401413	35401735	322	1	1	1	35401412	35401733	1	1
14	37770110	37770199	89	0	1	0	37770110	37770199	0	0
14	38245251	38245468	217	1	1	1	38245237	38245453	1	1
14	40098409	40100232	1823	1	1	1	40098393	40100215	1	0
14	40609816	40617673	7857	1	1	0	40609816	40617037	1	1
14	41609439	41669668	60229	1	0	NA	NA	NA	1	0
14	42486335	42486651	316	1	1	1	42486323	42486638	1	1
14	43119215	43119275	60	1	1	1	43119191	43119249	0	1
14	43550003	43550078	75	0	1	1	43550003	43550078	0	0
14	44714147	44721081	6934	1	1	1	44714148	44721081	1	1
14	46577938	46578259	321	1	1	1	46577925	46578245	1	1
14	46830459	46830589	130	1	0	NA	NA	NA	0	1
14	48334255	48334571	316	1	1	1	48334243	48334558	1	1
14	50118887	50119045	158	1	1	1	50118887	50119044	1	1
14	54564066	54564401	335	1	1	1	54564066	54564400	1	1
14	59545313	59545621	308	1	1	1	59545314	59545621	1	1
14	59883921	59883992	71	1	1	1	59883922	59884009	0	1
14	63621537	63621831	294	1	1	1	63621537	63621831	0	1
14	64504387	64504469	82	1	0	NA	NA	NA	0	1
14	65360396	65363551	3155	1	1	1	65360397	65363551	1	0
14	65606394	65608046	1652	1	1	1	65606359	65608049	1	0
14	65842540	65842630	90	0	1	0	65842540	65842630	0	0
14	66077924	66078014	90	0	1	1	66077924	66078014	0	0
14	66810644	66810957	313	1	1	1	66810631	66810943	1	1
14	68377011	68377157	146	1	1	1	68377012	68377164	0	1
14	68995394	68995469	75	1	1	1	68995394	68995468	1	1
14	70690068	70690257	189	1	1	1	70690054	70690242	1	1
14	70891145	70891267	122	0	1	1	70891145	70891267	0	0
14	70891278	70891355	77	0	1	0	70891278	70891355	0	0
14	70891722	70891782	60	0	1	0	70891722	70891782	0	0
14	71320978	71321272	294	1	1	1	71320978	71321271	1	1
14	71437836	71438170	334	1	1	1	71437828	71438161	1	1
14	71450270	71451353	1083	0	1	1	71450270	71451353	0	0
14	72490793	72490844	51	1	0	NA	NA	NA	1	0
14	75520941	75525523	4582	1	1	1	75520940	75525521	1	1
14	75658933	75659372	439	1	1	1	75658932	75659370	1	1
14	76753483	76753551	68	1	0	NA	NA	NA	0	1
14	77193683	77193741	58	1	0	NA	NA	NA	0	1
14	77193739	77193797	58	0	1	1	77193739	77193797	0	0
14	78828245	78828597	352	1	1	1	78828237	78828588	1	1
14	79653942	79654042	100	1	1	1	79653928	79654027	1	1
14	81775163	81775265	102	0	1	1	81775163	81775265	0	0
14	81878212	81880613	2401	1	1	1	81878214	81880613	1	0
14	83337527	83339191	1664	1	1	1	83337527	83339190	1	0
14	83635853	83636501	648	1	1	1	83635837	83636484	1	0
14	83900410	83900501	91	1	1	1	83900392	83900482	1	1
14	85297116	85302164	5048	1	1	1	85297109	85302156	1	0
14	87858064	87858392	328	1	1	1	87858061	87858388	1	1
14	88890020	88890178	158	1	1	1	88890021	88890178	1	1
14	89408838	89409089	251	1	1	1	89408829	89409079	1	1
14	94235314	94235370	56	1	1	1	94235331	94235388	0	1
14	94638740	94639878	1138	1	1	1	94638739	94639876	1	0
14	96622642	96622709	67	0	1	1	96622642	96622709	0	0
14	97175185	97175728	543	0	1	0	97175185	97175728	0	0
14	97175676	97175795	119	1	0	NA	NA	NA	0	1
14	98480416	98480503	87	0	1	0	98480416	98480503	0	0
14	98733931	98733987	56	0	1	1	98733931	98733987	0	0
14	98784003	98785111	1108	1	1	1	98783996	98785103	1	1
15	101051780	101052218	438	0	1	1	101051780	101052218	0	0
15	101075904	101075974	70	1	0	NA	NA	NA	0	1
15	101160719	101160811	92	1	1	1	101160719	101160811	0	1
15	20019115	20019285	170	0	1	1	20019115	20019285	0	0
15	20546336	20546493	157	1	0	NA	NA	NA	0	1
15	20546625	20547517	892	1	0	NA	NA	NA	0	1
15	20581504	20589654	8150	0	1	1	20581504	20589654	0	0
15	22323837	22323931	94	0	1	0	22323837	22323931	0	0
15	22336854	22344094	7240	1	1	1	22336855	22344094	1	0
15	22511627	22511958	331	0	1	1	22511627	22511958	0	0
15	23102313	23102530	217	0	1	0	23102313	23102530	0	0
15	23407534	23407620	86	0	1	0	23407534	23407620	0	0
15	24107716	24107873	157	1	1	1	24107713	24107877	1	1
15	24207068	24207378	310	1	1	1	24207059	24207368	1	1
15	27021492	27021794	302	1	1	1	27021494	27021802	0	1
15	28596639	28596762	123	0	1	0	28596639	28596762	0	0
15	29411482	29411905	423	1	1	1	29411476	29411898	1	1
15	31803299	31803770	471	0	1	0	31803299	31803770	0	0
15	34200447	34200703	256	1	0	NA	NA	NA	1	1
15	35009018	35009353	335	1	1	1	35009018	35009353	0	1
15	36954643	36954695	52	1	1	1	36954643	36954695	0	1
15	37544737	37544799	62	1	1	1	37544737	37544798	1	1
15	40329821	40329906	85	1	1	1	40329822	40329906	1	1
15	41111575	41113954	2379	1	1	1	41111604	41113983	1	1
15	41585696	41585764	68	1	0	NA	NA	NA	0	1
15	41604024	41604435	411	1	1	1	41604021	41604431	1	1
15	46860707	46861169	462	1	1	1	46860708	46861169	1	1
15	47720634	47720809	175	1	1	1	47720635	47720809	1	1
15	50448256	50448332	76	1	1	1	50448256	50448329	0	1
15	50787454	50787508	54	0	1	1	50787454	50787508	0	0
15	52525194	52525528	334	1	1	1	52525195	52525528	1	1
15	53409658	53409754	96	0	1	1	53409658	53409754	0	0
15	55218231	55224425	6194	1	1	1	55218225	55224433	1	1
15	55429906	55430228	322	1	0	NA	NA	NA	1	1
15	57979700	57979770	70	0	1	0	57979700	57979770	0	0
15	57980281	57980353	72	0	1	0	57980281	57980353	0	0
15	57980454	57980590	136	0	1	0	57980454	57980590	0	0
15	58596507	58596829	322	1	1	1	58596499	58596820	1	1
15	58912865	58913184	319	1	1	1	58912860	58913178	1	1
15	59712898	59713230	332	1	1	1	59712897	59713228	1	1
15	59831459	59831585	126	0	1	1	59831459	59831585	0	0
15	59831474	59831532	58	0	1	0	59831474	59831532	0	0
15	59831656	59831753	97	0	1	1	59831656	59831753	0	0
15	62947785	62947892	107	0	1	1	62947785	62947892	0	0
15	63441742	63441820	78	1	1	1	63441743	63441820	1	1
15	64664109	64664228	119	1	1	1	64664129	64664248	0	1
15	65816037	65819267	3230	0	1	1	65816037	65819267	0	0
15	65873613	65873781	168	1	1	1	65873622	65873791	0	1
15	66633824	66634146	322	1	1	1	66633821	66634142	1	1
15	67404678	67405610	932	0	1	1	67404678	67405610	0	0
15	67534479	67534814	335	1	1	1	67534467	67534801	1	1
15	68063460	68063516	56	1	1	1	68063460	68063516	0	1
15	68426020	68428946	2926	1	1	1	68426004	68428929	1	1
15	68713340	68713559	219	1	1	1	68713339	68713557	1	0
15	69049569	69049898	329	1	1	1	69049581	69049910	0	1
15	69532572	69532631	59	0	1	1	69532572	69532631	0	0
15	70476044	70476111	67	1	1	1	70476045	70476107	1	1
15	70571972	70572185	213	0	1	1	70571972	70572185	0	0
15	71885481	71885820	339	1	1	1	71885477	71885815	1	1
15	72385967	72388160	2193	1	1	1	72385967	72388160	1	1
15	74164207	74164388	181	1	1	1	74164206	74164386	1	1
15	75867321	75867624	303	0	1	1	75867321	75867624	0	0
15	76884597	76896940	12343	1	1	1	76884597	76896939	1	1
15	77330748	77332724	1976	1	0	NA	NA	NA	1	0
15	77910872	77911247	375	1	1	1	77910863	77911237	1	1
15	79084265	79084358	93	1	1	1	79084265	79084357	1	1
15	79475017	79475127	110	0	1	1	79475017	79475127	0	0
15	79891856	79892178	322	1	1	1	79891857	79892178	1	1
15	79911602	79911915	313	1	1	1	79911588	79911900	1	1
15	83551632	83557667	6035	1	1	1	83551610	83557671	1	1
15	85471752	85471828	76	1	0	NA	NA	NA	0	1
15	93315163	93315234	71	1	1	1	93315164	93315234	1	1
15	93515798	93516112	314	1	1	1	93515789	93516102	1	1
15	93747462	93747528	66	1	1	1	93747491	93747555	0	1
15	94933293	94933362	69	1	1	1	94933280	94933348	1	1
15	97262969	97263056	87	1	1	1	97262991	97263075	0	1
15	98706104	98706433	329	1	1	1	98706090	98706418	1	1
16	10925109	10925644	535	1	1	1	10925110	10925644	1	0
16	11731922	11731974	52	0	1	1	11731922	11731974	0	0
16	12354839	12355350	511	0	1	1	12354839	12355350	0	0
16	1298187	1298254	67	1	0	NA	NA	NA	0	1
16	13292141	13292219	78	0	1	1	13292141	13292219	0	0
16	13294467	13296497	2030	1	1	1	13294467	13296496	1	0
16	13944337	13944439	102	1	0	NA	NA	NA	0	1
16	14075623	14075743	120	1	1	1	14075623	14075742	1	1
16	1422853	1424116	1263	0	1	1	1422853	1424116	0	0
16	14470519	14470811	292	1	1	1	14470518	14470810	0	1
16	14967868	14967945	77	1	0	NA	NA	NA	0	1
16	15021854	15021925	71	1	0	NA	NA	NA	0	1
16	16543263	16543316	53	0	1	1	16543263	16543316	0	0
16	17226340	17226395	55	1	0	NA	NA	NA	0	1
16	17226395	17226450	55	0	1	1	17226395	17226450	0	0
16	19506335	19506655	320	1	1	1	19506319	19506638	1	1
16	20778557	20778878	321	1	1	1	20778543	20778863	1	1
16	22908975	22909253	278	1	1	1	22908976	22909253	1	1
16	23047781	23049532	1751	1	1	1	23047776	23049532	1	0
16	23528553	23528867	314	1	1	1	23528547	23528861	1	1
16	23760386	23762193	1807	1	0	NA	NA	NA	1	0
16	24060683	24060827	144	1	1	1	24060744	24060817	0	1
16	25340111	25343130	3019	1	1	1	25340112	25343130	1	1
16	25721775	25721831	56	1	1	1	25721776	25721831	1	1
16	2658385	2670446	12061	0	1	1	2658385	2670446	0	0
16	26608037	26608380	343	1	1	1	26608037	26608379	1	1
16	26733640	26733715	75	1	1	1	26733658	26733724	0	1
16	27050122	27050244	122	1	1	1	27050120	27050241	1	1
16	29460493	29460605	112	0	1	1	29460493	29460605	0	0
16	3061567	3061679	112	1	1	1	3061556	3061666	1	1
16	31327360	31327548	188	1	1	1	31327366	31327559	0	1
16	31998343	32000692	2349	0	1	1	31998343	32000692	0	0
16	32110289	32112082	1793	0	1	1	32110289	32112082	0	0
16	32343500	32343575	75	0	1	0	32343500	32343575	0	0
16	32419950	32420007	57	0	1	1	32419950	32420007	0	0
16	32454292	32454465	173	0	1	0	32454292	32454465	0	0
16	32473474	32473783	309	0	1	1	32473474	32473783	0	0
16	32525917	32525974	57	1	0	NA	NA	NA	0	1
16	32822735	32823561	826	0	1	0	32822735	32823561	0	0
16	32941879	32944227	2348	0	1	1	32941879	32944227	0	0
16	33053572	33055365	1793	0	1	1	33053572	33055365	0	0
16	33070215	33071035	820	0	1	0	33070215	33071035	0	0
16	33070738	33070828	90	0	1	1	33070738	33070828	0	0
16	33341094	33341163	69	0	1	0	33341094	33341163	0	0
16	33341582	33341642	60	0	1	0	33341582	33341642	0	0
16	33374050	33379406	5356	0	1	1	33374050	33379406	0	0
16	33514956	33515019	63	0	1	1	33514956	33515019	0	0
16	33723388	33725736	2348	0	1	1	33723388	33725736	0	0
16	33754048	33754216	168	1	0	NA	NA	NA	0	1
16	33968787	33968959	172	1	0	NA	NA	NA	0	1
16	33973870	33974041	171	1	0	NA	NA	NA	0	1
16	34194292	34194344	52	1	0	NA	NA	NA	0	1
16	35271879	35272220	341	1	0	NA	NA	NA	0	1
16	3994595	3994649	54	1	1	1	3994596	3994649	0	1
16	3994631	3994686	55	1	0	NA	NA	NA	1	0
16	4251453	4251836	383	1	1	1	4251473	4251851	0	1
16	46394928	46395030	102	0	1	0	46394928	46395030	0	0
16	46395031	46395248	217	0	1	0	46395031	46395248	0	0
16	46395425	46395547	122	0	1	0	46395425	46395547	0	0
16	46395704	46395827	123	0	1	0	46395704	46395827	0	0
16	46395840	46395981	141	0	1	1	46395840	46395981	0	0
16	46396157	46396265	108	0	1	0	46396157	46396265	0	0
16	46397680	46397791	111	0	1	0	46397680	46397791	0	0
16	46401961	46402073	112	0	1	1	46401961	46402073	0	0
16	46402666	46403315	649	0	1	0	46402666	46403315	0	0
16	46427171	46427265	94	0	1	0	46427171	46427265	0	0
16	46431203	46431257	54	0	1	1	46431203	46431257	0	0
16	46438913	46439019	106	1	0	NA	NA	NA	0	1
16	46979646	46979723	77	1	1	1	46979647	46979723	1	1
16	48508918	48511378	2460	0	1	1	48508918	48511378	0	0
16	49036088	49036224	136	1	1	1	49036074	49036209	1	1
16	49499438	49499498	60	1	1	1	49499434	49499493	1	1
16	51048041	51048117	76	0	1	1	51048041	51048117	0	0
16	52904249	52904375	126	1	1	1	52904249	52904374	1	1
16	530785	531097	312	1	0	NA	NA	NA	1	1
16	56574591	56574763	172	1	1	1	56574589	56574760	1	1
16	56617028	56617363	335	1	1	1	56617029	56617363	1	1
16	56956811	56956871	60	0	1	1	56956811	56956871	0	0
16	57725395	57727847	2452	1	1	1	57725396	57727847	1	0
16	58647215	58650290	3075	1	1	1	58647191	58650265	1	0
16	58819559	58819635	76	1	1	1	58819559	58819634	1	1
16	59088378	59088435	57	1	1	1	59088378	59088444	1	1
16	60032093	60032408	315	1	1	1	60032087	60032401	1	1
16	60910045	60913933	3888	1	1	1	60910046	60913933	1	1
16	60918873	60919042	169	1	0	NA	NA	NA	0	1
16	62046876	62047210	334	1	1	1	62046876	62047209	1	1
16	63442423	63442756	333	1	1	1	63442428	63442759	0	1
16	63756309	63756392	83	1	1	1	63756308	63756390	1	1
16	65570933	65571012	79	1	1	1	65570961	65571041	0	1
16	72753298	72753604	306	1	1	1	72753298	72753603	1	1
16	75095430	75095506	76	0	1	1	75095430	75095506	0	0
16	75238620	75239204	584	1	0	NA	NA	NA	0	1
16	76539135	76544027	4892	1	1	1	76539136	76544027	1	0
16	78068250	78068446	196	1	1	1	78068288	78068494	0	1
16	796159	796246	87	0	1	0	796159	796246	0	0
16	796367	796586	219	0	1	0	796367	796586	0	0
16	80196902	80197005	103	1	1	1	80196901	80197003	1	0
16	80468644	80468958	314	1	1	1	80468632	80468945	1	1
16	8066622	8066949	327	1	1	1	8066622	8066948	1	1
16	81119479	81119833	354	1	1	1	81119474	81119827	1	1
16	81173842	81174336	494	1	1	1	81173842	81174350	1	1
16	8161744	8161828	84	1	1	1	8161744	8161828	0	1
16	83757788	83757864	76	1	1	1	83757787	83757863	0	1
16	84085081	84085138	57	0	1	0	84085081	84085138	0	0
16	85781658	85781794	136	1	1	1	85781659	85781794	1	1
16	85917086	85917190	104	1	1	1	85917115	85917217	0	1
16	85996946	85997566	620	1	1	1	85996940	85997564	1	0
16	8614858	8614919	61	1	0	NA	NA	NA	1	1
16	86284321	86284630	309	1	1	1	86284311	86284619	1	1
16	86917791	86917874	83	0	1	1	86917791	86917874	0	0
16	8755234	8756793	1559	0	1	1	8755234	8756793	0	0
16	87597638	87597737	99	1	0	NA	NA	NA	0	1
16	876641	876973	332	1	1	1	876633	876964	1	1
16	87705189	87705241	52	1	1	1	87705203	87705255	0	1
16	87981801	87981856	55	1	1	1	87981800	87981854	1	1
16	88489501	88489574	73	1	1	1	88489502	88489582	0	1
16	88567492	88567697	205	0	1	0	88567492	88567697	0	0
16	88862633	88863602	969	1	1	1	88862633	88863602	1	0
16	9406965	9407045	80	1	0	NA	NA	NA	0	1
16	9867799	9867870	71	1	1	1	9867799	9867870	0	1
17	1062581	1062875	294	0	1	1	1062581	1062875	0	0
17	11411668	11412315	647	1	1	0	11411669	11412044	1	0
17	11412260	11412328	68	0	1	0	11412260	11412328	0	0
17	11557390	11557712	322	1	1	1	11557376	11557697	1	1
17	1189640	1189714	74	0	1	1	1189640	1189714	0	0
17	1189679	1189754	75	1	0	NA	NA	NA	0	1
17	12196594	12196912	318	1	1	1	12196581	12196898	1	1
17	1250079	1250420	341	1	0	NA	NA	NA	0	1
17	12973752	12973815	63	1	0	NA	NA	NA	0	1
17	13161043	13161328	285	0	1	1	13161043	13161328	0	0
17	13161230	13161420	190	1	1	0	13161261	13161451	0	1
17	136726	137056	330	0	1	0	136726	137056	0	0
17	13704560	13704850	290	1	1	1	13704546	13704835	1	1
17	138331	138659	328	0	1	0	138331	138659	0	0
17	14189911	14191557	1646	1	1	1	14189911	14191556	1	0
17	15863570	15863887	317	1	1	1	15863569	15863885	0	1
17	17210789	17210905	116	1	0	NA	NA	NA	0	1
17	17230381	17231258	877	1	1	1	17230376	17231252	1	0
17	17230999	17231258	259	1	0	NA	NA	NA	0	1
17	18637470	18637781	311	1	0	NA	NA	NA	0	1
17	18791153	18792179	1026	1	1	1	18791143	18792168	1	0
17	19543419	19543727	308	0	1	1	19543419	19543727	0	0
17	20662589	20663062	473	1	0	NA	NA	NA	0	1
17	211580	211698	118	1	0	NA	NA	NA	1	0
17	21321279	21322822	1543	0	1	1	21321279	21322822	0	0
17	21344758	21344854	96	1	0	NA	NA	NA	0	1
17	2194924	2195056	132	1	1	1	2194921	2195056	0	1
17	25289558	25289697	139	0	1	0	25289558	25289697	0	0
17	25293497	25293553	56	1	0	NA	NA	NA	0	1
17	267607	267675	68	1	0	NA	NA	NA	0	1
17	26843168	26844464	1296	0	1	0	26843168	26844464	0	0
17	2719930	2721220	1290	1	0	NA	NA	NA	1	0
17	2917428	2917487	59	1	0	NA	NA	NA	0	1
17	29659591	29659942	351	1	1	1	29659592	29659942	1	1
17	30419149	30419233	84	0	1	1	30419149	30419233	0	0
17	30436741	30437061	320	1	1	1	30436749	30437067	0	1
17	31596680	31596752	72	1	0	NA	NA	NA	0	1
17	31791497	31791576	79	0	1	1	31791497	31791576	0	0
17	32426152	32426205	53	1	0	NA	NA	NA	1	0
17	34376293	34376625	332	1	1	1	34376293	34376624	1	1
17	34540768	34540821	53	0	1	1	34540768	34540821	0	0
17	34642334	34642387	53	1	1	1	34642335	34642388	0	1
17	35146277	35146343	66	1	0	NA	NA	NA	0	1
17	35755650	35758785	3135	0	1	1	35755650	35758785	0	0
17	37637912	37637976	64	1	0	NA	NA	NA	1	0
17	39392114	39392167	53	1	1	1	39392115	39392167	1	1
17	39421837	39432141	10304	0	1	1	39421837	39432141	0	0
17	3989570	3989630	60	1	0	NA	NA	NA	0	1
17	3989624	3989684	60	0	1	1	3989624	3989684	0	0
17	408690	409545	855	0	1	0	408690	409545	0	0
17	409665	409740	75	0	1	0	409665	409740	0	0
17	409859	410194	335	0	1	0	409859	410194	0	0
17	42053305	42053381	76	0	1	0	42053305	42053381	0	0
17	47228453	47228784	331	1	1	1	47228441	47228771	1	1
17	47826826	47827890	1064	1	1	1	47826810	47827872	1	0
17	48102499	48102619	120	0	1	1	48102499	48102619	0	0
17	48427522	48427907	385	1	1	1	48427505	48427889	1	1
17	52705177	52705228	51	1	0	NA	NA	NA	1	0
17	55776411	55776541	130	1	1	1	55776465	55776592	0	1
17	56151624	56151801	177	1	0	NA	NA	NA	0	1
17	57870216	57871186	970	1	1	1	57870217	57871186	1	0
17	5933608	5933925	317	1	1	1	5933608	5933925	0	1
17	6036575	6036701	126	1	0	NA	NA	NA	0	1
17	6177704	6177767	63	0	1	1	6177704	6177767	0	0
17	63272055	63272374	319	1	0	NA	NA	NA	0	1
17	63966522	63966583	61	0	1	0	63966522	63966583	0	0
17	65520865	65521196	331	1	1	1	65520855	65521185	1	1
17	65727371	65727648	277	1	1	1	65727371	65727647	1	1
17	66031568	66031625	57	1	0	NA	NA	NA	0	1
17	66227557	66227776	219	1	1	1	66227556	66227774	1	1
17	67087666	67087978	312	1	1	1	67087666	67087977	1	1
17	68455097	68461188	6091	1	1	1	68455088	68461178	1	1
17	69852154	69852482	328	1	1	1	69852154	69852481	1	1
17	72050992	72051069	77	0	1	1	72050992	72051069	0	0
17	72393122	72393257	135	1	1	1	72393117	72393251	1	1
17	73040289	73040602	313	1	1	1	73040299	73040616	0	1
17	73799103	73799199	96	1	1	1	73799117	73799213	0	1
17	74987530	74987850	320	1	1	1	74987530	74987849	1	1
17	75242055	75242223	168	1	1	1	75242030	75242196	0	1
17	75988298	75988614	316	1	1	1	75988298	75988613	1	1
17	76282252	76283446	1194	0	1	1	76282252	76283446	0	0
17	77125452	77125608	156	1	1	1	77125449	77125604	1	1
17	77438296	77438410	114	1	1	1	77438305	77438458	0	1
17	77867680	77867759	79	0	1	1	77867680	77867759	0	0
17	78287954	78288090	136	0	1	1	78287954	78288090	0	0
17	78575354	78576282	928	1	1	1	78575354	78576281	1	1
17	78665069	78665138	69	1	1	1	78665070	78665138	1	1
17	78814739	78814802	63	1	0	NA	NA	NA	0	1
17	78892236	78892324	88	0	1	1	78892236	78892324	0	0
17	79117286	79117358	72	1	1	1	79117272	79117343	1	1
17	79225040	79225101	61	0	1	1	79225040	79225101	0	0
17	79577696	79578020	324	1	1	1	79577682	79578005	1	1
17	8011127	8011362	235	1	0	NA	NA	NA	1	1
17	801628	802229	601	1	1	1	801627	802228	1	1
17	80185447	80185513	66	1	0	NA	NA	NA	0	1
17	80185497	80185567	70	1	1	1	80185497	80185566	1	0
17	80218130	80218192	62	0	1	1	80218130	80218192	0	0
17	80305099	80305187	88	1	0	NA	NA	NA	0	1
17	80343885	80343955	70	1	0	NA	NA	NA	0	1
17	80572191	80572263	72	1	1	1	80572205	80572277	0	1
17	8384384	8384453	69	1	1	1	8384395	8384464	0	1
17	845909	846251	342	0	1	0	845909	846251	0	0
17	894425	895813	1388	0	1	1	894425	895813	0	0
18	10331020	10331161	141	1	1	1	10331020	10331160	1	1
18	10462395	10462612	217	1	1	1	10462421	10462648	0	1
18	109995	110063	68	1	0	NA	NA	NA	0	1
18	110418	110492	74	1	0	NA	NA	NA	0	1
18	11509709	11511475	1766	1	1	0	11509709	11511478	1	0
18	11826283	11826383	100	1	1	1	11826269	11826368	1	1
18	1199564	1200311	747	1	1	1	1199564	1200310	1	1
18	1219343	1219485	142	1	1	1	1219340	1219501	1	1
18	12228006	12228073	67	1	1	1	12228006	12228072	1	1
18	12851196	12851526	330	1	1	1	12851184	12851513	1	1
18	13674320	13674719	399	0	1	1	13674320	13674719	0	0
18	14223312	14223387	75	1	0	NA	NA	NA	0	1
18	14452227	14452329	102	0	1	0	14452227	14452329	0	0
18	14822943	14823308	365	1	0	NA	NA	NA	0	1
18	15388433	15389968	1535	0	1	0	15388433	15389968	0	0
18	15393014	15393354	340	0	1	1	15393014	15393354	0	0
18	207031	207708	677	1	1	1	207031	207707	1	1
18	21903373	21904594	1221	1	1	1	21903373	21904604	1	0
18	22892475	22892799	324	1	1	1	22892484	22892808	0	1
18	23473581	23473651	70	1	1	1	23473582	23473651	1	1
18	24571620	24572342	722	1	1	1	24571621	24572342	1	1
18	2472724	2472839	115	1	1	1	2472724	2472838	1	1
18	25827881	25828217	336	1	1	1	25827876	25828210	0	1
18	2614473	2614660	187	1	1	1	2614442	2614629	1	1
18	26274529	26274622	93	1	0	NA	NA	NA	0	1
18	26363758	26364080	322	1	1	1	26363745	26364066	1	1
18	27363761	27363963	202	0	1	0	27363761	27363963	0	0
18	27629690	27630017	327	1	1	1	27629690	27630016	1	1
18	27872572	27872901	329	1	1	1	27872583	27872911	0	1
18	2997377	2997459	82	1	1	1	2997378	2997459	1	1
18	32530961	32531232	271	1	1	1	32530962	32531232	1	1
18	33390244	33390588	344	1	1	1	33390242	33390583	0	1
18	37061646	37061977	331	1	1	1	37061634	37061964	1	1
18	37067014	37067073	59	1	1	1	37067015	37067072	1	1
18	3772356	3772409	53	1	0	NA	NA	NA	0	1
18	3833132	3833184	52	1	0	NA	NA	NA	0	1
18	38864794	38868346	3552	1	1	1	38864785	38868343	1	1
18	3997031	3997489	458	1	1	1	3997031	3997488	1	0
18	40054079	40057655	3576	1	1	1	40054080	40057655	1	0
18	41031553	41032529	976	1	1	1	41031546	41032530	1	1
18	41453429	41453755	326	1	0	NA	NA	NA	0	1
18	41976708	41982075	5367	1	1	1	41976708	41982074	1	0
18	42838109	42838812	703	1	1	1	42838109	42838811	1	1
18	43261014	43261340	326	1	1	1	43261005	43261330	1	1
18	44715171	44715249	78	1	1	1	44715171	44715248	1	1
18	45996162	45996480	318	1	1	1	45996145	45996462	1	1
18	46159351	46159430	79	1	1	1	46159352	46159430	1	1
18	46256853	46256962	109	1	0	NA	NA	NA	0	1
18	47851163	47851235	72	1	0	NA	NA	NA	0	1
18	4955594	4955991	397	1	1	1	4955591	4955987	1	1
18	50168400	50168455	55	1	1	1	50168402	50168454	1	0
18	50462567	50463033	466	1	1	1	50462568	50463033	1	0
18	50925992	50926316	324	1	1	1	50925981	50926304	1	1
18	51831868	51832051	183	1	0	NA	NA	NA	0	1
18	51952968	51956965	3997	1	1	1	51952965	51956961	1	1
18	5306857	5307343	486	0	1	1	5306857	5307343	0	0
18	5308218	5308275	57	1	0	NA	NA	NA	1	0
18	53765623	53765691	68	1	1	1	53765641	53765709	0	1
18	54946737	54948718	1981	1	1	1	54946738	54948718	1	0
18	55671136	55671443	307	1	1	1	55671121	55671426	1	1
18	55801592	55801919	327	1	1	1	55801591	55801917	1	1
18	60248761	60249069	308	0	1	0	60248761	60249069	0	0
18	633827	633884	57	1	1	1	633814	633870	1	0
18	63449265	63449353	88	0	1	1	63449265	63449353	0	0
18	63533254	63533599	345	1	1	1	63533255	63533599	1	1
18	63912	64020	108	0	1	0	63912	64020	0	0
18	64542946	64543268	322	1	1	1	64542933	64543254	1	1
18	65440608	65440761	153	0	1	1	65440608	65440761	0	0
18	65520686	65520740	54	1	1	1	65520685	65520739	0	1
18	65947290	65947428	138	1	1	1	65947319	65947455	0	1
18	66228957	66229336	379	1	1	1	66228958	66229336	1	1
18	666892	666946	54	0	1	1	666892	666946	0	0
18	67283643	67283724	81	0	1	1	67283643	67283724	0	0
18	68846741	68847076	335	1	1	1	68846741	68847075	1	1
18	69078398	69079056	658	0	1	1	69078398	69079056	0	0
18	69332945	69333001	56	1	1	1	69332970	69333025	0	1
18	7073839	7073893	54	1	1	1	7073838	7073891	1	1
18	70874339	70874678	339	0	1	1	70874339	70874678	0	0
18	72817199	72817275	76	0	1	1	72817199	72817275	0	0
18	73570021	73570347	326	1	1	1	73570011	73570336	1	1
18	73810342	73810416	74	1	1	1	73810359	73810433	0	1
18	74135527	74135592	65	1	1	0	74135530	74135596	0	1
18	74297755	74297924	169	1	0	NA	NA	NA	1	1
18	74730311	74730382	71	1	1	1	74730312	74730382	1	1
18	75266998	75268161	1163	1	1	1	75266998	75268160	1	0
18	75681576	75681640	64	1	0	NA	NA	NA	0	1
18	75997290	75997623	333	1	1	0	75997296	75997628	0	1
18	76130002	76130192	190	0	1	0	76130002	76130192	0	0
18	76130251	76130330	79	0	1	0	76130251	76130330	0	0
18	76344624	76344695	71	1	1	1	76344610	76344692	0	1
18	76374570	76374655	85	0	1	0	76374570	76374655	0	0
18	76411589	76411648	59	1	0	NA	NA	NA	0	1
18	76420324	76420392	68	1	0	NA	NA	NA	0	1
18	76430808	76430887	79	1	0	NA	NA	NA	0	1
18	76477568	76477638	70	1	0	NA	NA	NA	0	1
18	76599181	76599301	120	0	1	0	76599181	76599301	0	0
18	76600607	76600725	118	0	1	0	76600607	76600725	0	0
18	77097146	77097226	80	0	1	1	77097146	77097226	0	0
18	77625719	77626009	290	1	1	1	77625726	77626016	0	1
18	77679816	77679894	78	0	1	1	77679816	77679894	0	0
18	828474	828797	323	1	1	1	828480	828804	0	1
18	836734	837684	950	1	1	1	836716	837666	1	1
18	837419	837666	247	1	0	NA	NA	NA	1	0
18	9036098	9036388	290	1	1	1	9036085	9036374	1	1
18	9225120	9225455	335	1	1	1	9225119	9225454	0	1
18	9621933	9622241	308	1	0	NA	NA	NA	0	1
18	9626591	9626662	71	1	1	1	9626587	9626657	1	1
19	11320296	11320376	80	1	0	NA	NA	NA	0	1
19	11535579	11535640	61	0	1	1	11535579	11535640	0	0
19	12557711	12558001	290	1	1	1	12557708	12557997	1	1
19	13775680	13776843	1163	1	1	1	13775688	13776851	1	0
19	14732345	14734143	1798	1	1	1	14732331	14734128	1	0
19	15046392	15049479	3087	1	1	1	15046393	15049479	1	0
19	15692105	15692159	54	0	1	1	15692105	15692159	0	0
19	15784686	15784762	76	0	1	1	15784686	15784762	0	0
19	15784940	15785134	194	0	1	1	15784940	15785134	0	0
19	15787319	15787468	149	0	1	1	15787319	15787468	0	0
19	17459932	17460030	98	1	0	NA	NA	NA	0	1
19	17703909	17704293	384	1	0	NA	NA	NA	0	1
19	18661286	18661603	317	1	0	NA	NA	NA	0	1
19	18926137	18926307	170	1	1	1	18926133	18926303	1	1
19	1923876	1924011	135	1	0	NA	NA	NA	0	1
19	1959766	1959842	76	1	0	NA	NA	NA	0	1
19	1967924	1968072	148	0	1	0	1967924	1968072	0	0
19	19802230	19802609	379	1	1	1	19802235	19802613	0	1
19	19996028	19996172	144	1	1	1	19996068	19996212	0	1
19	21319460	21319623	163	1	0	NA	NA	NA	0	1
19	21513959	21514154	195	1	1	1	21513967	21514154	0	1
19	21903057	21905568	2511	1	1	1	21903056	21905573	1	0
19	22436158	22436288	130	0	1	1	22436158	22436288	0	0
19	23078046	23078097	51	0	1	1	23078046	23078097	0	0
19	23320803	23321121	318	1	1	1	23320793	23321110	1	1
19	2347178	2347401	223	0	1	1	2347178	2347401	0	0
19	2347438	2347525	87	0	1	1	2347438	2347525	0	0
19	2347565	2347658	93	0	1	1	2347565	2347658	0	0
19	23649284	23649350	66	0	1	0	23649284	23649350	0	0
19	23986394	23986722	328	1	0	NA	NA	NA	0	1
19	24594355	24594524	169	1	0	NA	NA	NA	0	1
19	24595186	24596043	857	1	0	NA	NA	NA	0	1
19	2575986	2576100	114	0	1	1	2575986	2576100	0	0
19	2674195	2674284	89	1	1	1	2674196	2674284	1	1
19	27851544	27852232	688	1	0	NA	NA	NA	0	1
19	27868108	27868449	341	1	0	NA	NA	NA	0	1
19	27881773	27882455	682	1	0	NA	NA	NA	0	1
19	27890018	27890189	171	1	0	NA	NA	NA	0	1
19	27924786	27924866	80	0	1	1	27924786	27924866	0	0
19	30386533	30386757	224	1	1	1	30386532	30386755	1	1
19	30388817	30393101	4284	1	1	1	30388792	30393102	1	1
19	30608897	30608965	68	1	1	1	30608886	30608954	0	1
19	31287391	31289660	2269	0	1	1	31287391	31289660	0	0
19	31733651	31733772	121	1	1	1	31733651	31733771	1	1
19	3311161	3311289	128	0	1	1	3311161	3311289	0	0
19	34316368	34316577	209	1	1	1	34316369	34316577	1	1
19	350169	350239	70	0	1	0	350169	350239	0	0
19	350857	350994	137	0	1	0	350857	350994	0	0
19	351149	351257	108	0	1	0	351149	351257	0	0
19	351318	351526	208	0	1	1	351318	351526	0	0
19	36002380	36002432	52	1	1	1	36002381	36002432	1	1
19	37284335	37284646	311	1	0	NA	NA	NA	1	1
19	3866388	3866449	61	1	1	1	3866387	3866448	0	1
19	393775	393867	92	0	1	1	393775	393867	0	0
19	394020	394095	75	0	1	1	394020	394095	0	0
19	394155	394913	758	0	1	1	394155	394913	0	0
19	398512	398570	58	1	0	NA	NA	NA	0	1
19	40124705	40124788	83	1	1	1	40124706	40124788	1	1
19	41153273	41156016	2743	1	1	1	41153260	41156006	1	0
19	4227210	4227652	442	0	1	1	4227210	4227652	0	0
19	42307632	42307768	136	0	1	1	42307632	42307768	0	0
19	46278660	46279012	352	1	0	NA	NA	NA	1	1
19	46278660	46279637	977	1	1	1	46278660	46279636	1	0
19	46796793	46797121	328	1	0	NA	NA	NA	0	1
19	468835	468915	80	0	1	1	468835	468915	0	0
19	46956107	46956435	328	1	1	1	46956106	46956433	1	1
19	48845548	48845601	53	1	0	NA	NA	NA	0	1
19	49581954	49582260	306	1	1	1	49581961	49582262	0	1
19	49809819	49810309	490	1	0	NA	NA	NA	1	0
19	49947524	49947590	66	0	1	1	49947524	49947590	0	0
19	51030149	51030328	179	1	0	NA	NA	NA	0	1
19	51128989	51129064	75	1	0	NA	NA	NA	0	1
19	52175937	52177522	1585	1	1	1	52175931	52177515	1	0
19	52948971	52949078	107	1	1	1	52948970	52949076	1	1
19	53084128	53084264	136	1	1	1	53084124	53084260	1	1
19	53116936	53117018	82	1	0	NA	NA	NA	0	1
19	53235619	53235827	208	1	1	1	53235620	53235828	0	1
19	53422214	53424225	2011	1	1	1	53422198	53424208	1	0
19	53689177	53691960	2783	1	1	1	53689170	53691952	1	1
19	53820802	53821118	316	1	1	1	53820791	53821106	1	1
19	54075847	54075898	51	0	1	1	54075847	54075898	0	0
19	54383515	54383723	208	0	1	0	54383515	54383723	0	0
19	54613100	54613176	76	1	0	NA	NA	NA	0	1
19	54800857	54807621	6764	1	1	1	54800862	54807621	1	0
19	54810760	54811486	726	1	0	NA	NA	NA	1	1
19	5509862	5510830	968	0	1	1	5509862	5510830	0	0
19	56039062	56039124	62	0	1	1	56039062	56039124	0	0
19	56041807	56042146	339	1	1	1	56041847	56042184	0	1
19	56610005	56610082	77	1	0	NA	NA	NA	0	1
19	57111560	57111879	319	1	1	1	57111557	57111875	1	1
19	57458400	57458462	62	1	0	NA	NA	NA	0	1
19	57474907	57475612	705	1	1	1	57474907	57475611	1	0
19	58617788	58618127	339	1	1	1	58617789	58618127	1	1
19	58916617	58916793	176	1	0	NA	NA	NA	0	1
19	59035205	59035300	95	1	0	NA	NA	NA	1	1
19	59096467	59096623	156	1	1	1	59096468	59096623	1	1
19	6163201	6163492	291	1	0	NA	NA	NA	0	1
19	6987465	6987796	331	1	0	NA	NA	NA	0	1
19	8243013	8244959	1946	1	1	1	8243027	8244974	1	1
19	848145	848225	80	1	0	NA	NA	NA	0	1
19	8514425	8514733	308	1	1	1	8514415	8514722	1	1
2	100103714	100105032	1318	1	1	1	100103713	100105032	1	0
2	101975214	101975548	334	1	1	1	101975214	101975547	1	1
2	102097853	102098181	328	1	1	1	102097853	102098180	1	1
2	102402121	102402244	123	1	1	1	102402146	102402270	0	1
2	10373988	10374095	107	1	1	1	10373997	10374105	0	1
2	106890504	106890595	91	1	0	NA	NA	NA	1	1
2	106930529	106930631	102	1	1	1	106930529	106930631	0	1
2	1089573	1089777	204	0	1	0	1089573	1089777	0	0
2	1089832	1090103	271	0	1	0	1089832	1090103	0	0
2	109815974	109816301	327	0	1	0	109815974	109816301	0	0
2	1101711	1101919	208	1	1	1	1101759	1101967	0	1
2	112242225	112242534	309	0	1	0	112242225	112242534	0	0
2	112292494	112295517	3023	0	1	1	112292494	112295517	0	0
2	11253525	11253581	56	1	0	NA	NA	NA	0	1
2	113104573	113104633	60	1	0	NA	NA	NA	0	1
2	114151333	114153612	2279	1	0	NA	NA	NA	1	0
2	117893063	117893403	340	1	1	1	117893063	117893402	1	1
2	118850394	118850540	146	0	1	0	118850394	118850540	0	0
2	118881407	118882292	885	1	1	1	118881404	118882293	1	0
2	119060432	119060483	51	1	1	1	119060442	119060493	0	1
2	11994447	11994505	58	0	1	0	11994447	11994505	0	0
2	11994549	11994664	115	0	1	0	11994549	11994664	0	0
2	11994906	11995138	232	0	1	0	11994906	11995138	0	0
2	12019028	12022935	3907	1	1	1	12019027	12022933	1	1
2	1203944	1204016	72	0	1	1	1203944	1204016	0	0
2	121643763	121643834	71	0	1	1	121643763	121643834	0	0
2	1217509	1218369	860	1	0	NA	NA	NA	1	0
2	121782140	121782254	114	1	0	NA	NA	NA	0	1
2	1218822	1219028	206	0	1	1	1218822	1219028	0	0
2	122058944	122059008	64	0	1	1	122058944	122059008	0	0
2	122623755	122623810	55	1	1	1	122623756	122623810	1	1
2	1226755	1226889	134	0	1	1	1226755	1226889	0	0
2	123031601	123031702	101	1	0	NA	NA	NA	1	0
2	123364874	123365373	499	1	1	1	123364879	123365347	1	1
2	123616913	123616979	66	1	1	1	123616921	123616990	0	1
2	124170258	124170588	330	1	1	1	124170259	124170588	1	1
2	125377451	125377504	53	0	1	1	125377451	125377504	0	0
2	125428161	125428221	60	1	1	1	125428161	125428221	0	1
2	12596183	12596374	191	0	1	1	12596183	12596374	0	0
2	126408231	126408295	64	1	0	NA	NA	NA	0	1
2	126408263	126408329	66	0	1	1	126408263	126408329	0	0
2	126443251	126451836	8585	1	1	1	126443251	126451835	1	1
2	127505917	127506454	537	1	1	1	127505918	127506454	1	0
2	127674758	127677275	2517	1	1	1	127674759	127677275	1	1
2	128737078	128737168	90	1	1	1	128737079	128737168	1	1
2	128871272	128871583	311	1	1	1	128871270	128871580	1	1
2	129098552	129098756	204	0	1	1	129098552	129098756	0	0
2	130493096	130493165	69	1	0	NA	NA	NA	0	1
2	130493131	130493200	69	0	1	1	130493131	130493200	0	0
2	132335227	132335333	106	1	0	NA	NA	NA	0	1
2	132796228	132796304	76	0	1	1	132796228	132796304	0	0
2	132806504	132806555	51	0	1	1	132806504	132806555	0	0
2	132806533	132806595	62	0	1	1	132806533	132806595	0	0
2	132998842	132999352	510	1	0	NA	NA	NA	0	1
2	133027832	133027929	97	1	0	NA	NA	NA	0	1
2	134460279	134460587	308	1	1	1	134460279	134460586	1	1
2	134544291	134544624	333	1	1	1	134544291	134544623	1	1
2	134546279	134546358	79	1	0	NA	NA	NA	0	1
2	134546342	134546421	79	0	1	1	134546342	134546421	0	0
2	134765579	134765651	72	1	1	1	134765595	134765667	0	1
2	134765619	134765692	73	1	1	1	134765595	134765667	1	0
2	134966717	134970148	3431	1	1	1	134966702	134970132	1	1
2	138245304	138245649	345	1	1	1	138245301	138245645	1	1
2	139942348	139942399	51	1	0	NA	NA	NA	1	0
2	139987551	139987602	51	1	1	1	139987549	139987600	0	1
2	142351003	142351329	326	1	1	1	142351003	142351328	1	1
2	143927274	143927334	60	1	1	1	143927299	143927359	0	1
2	145293453	145293521	68	1	0	NA	NA	NA	0	1
2	1461118	1461252	134	0	1	0	1461118	1461252	0	0
2	151106283	151106344	61	1	0	NA	NA	NA	1	1
2	151903089	151903366	277	1	1	1	151903089	151903365	1	1
2	152617301	152617617	316	1	1	1	152617299	152617613	1	1
2	153153406	153153494	88	1	1	1	153153406	153153493	1	1
2	1534029	1535689	1660	0	1	0	1534029	1535689	0	0
2	1535766	1536382	616	0	1	0	1535766	1536382	0	0
2	154064580	154064684	104	1	1	1	154064577	154064680	1	0
2	155891193	155891510	317	1	1	1	155891193	155891509	1	1
2	156188114	156188296	182	1	1	1	156188113	156188296	0	1
2	156385289	156385346	57	1	0	NA	NA	NA	0	1
2	158719100	158719412	312	1	1	1	158719087	158719398	1	1
2	160149129	160151649	2520	1	1	1	160149126	160151657	1	1
2	161795610	161795935	325	1	1	1	161795608	161795932	1	1
2	162332271	162334046	1775	1	1	1	162332271	162334045	1	1
2	16251120	16251446	326	1	1	1	16251119	16251444	1	1
2	163666421	163666737	316	1	1	1	163666410	163666725	1	1
2	1642805	1642857	52	1	1	1	1642808	1642859	0	1
2	166267523	166267847	324	1	1	1	166267510	166267833	1	1
2	167447895	167448021	126	1	1	1	167447941	167448067	0	1
2	168895821	168896142	321	1	1	1	168895820	168896140	1	1
2	169081737	169081813	76	1	0	NA	NA	NA	0	1
2	169081811	169081887	76	0	1	1	169081811	169081887	0	0
2	169395477	169395790	313	1	1	1	169395464	169395776	1	1
2	169606133	169606210	77	1	1	1	169606133	169606209	1	1
2	170609577	170609669	92	0	1	1	170609577	170609669	0	0
2	170641519	170643952	2433	1	1	1	170641509	170643953	1	0
2	1711083	1711148	65	0	1	0	1711083	1711148	0	0
2	1723673	1723743	70	1	0	NA	NA	NA	0	1
2	172664712	172664823	111	1	1	1	172664713	172664823	1	1
2	173148045	173148102	57	1	1	1	173148040	173148096	1	1
2	174151744	174152060	316	1	1	1	174151744	174152059	1	1
2	175090640	175090961	321	1	1	1	175090630	175090950	1	1
2	176346682	176352736	6054	1	1	1	176346670	176352723	1	1
2	177265645	177272045	6400	1	1	1	177265645	177272044	1	0
2	178287640	178288055	415	1	1	1	178287638	178288062	1	1
2	181453912	181454637	725	1	1	1	181453911	181454635	1	0
2	181925837	181926160	323	1	1	1	181925829	181926151	1	1
2	182355983	182356299	316	1	1	1	182355983	182356298	1	1
2	182565255	182565584	329	1	1	1	182565242	182565570	1	1
2	184249981	184250325	344	1	1	1	184249968	184250311	1	1
2	186836523	186836581	58	0	1	1	186836523	186836581	0	0
2	187437112	187437294	182	1	1	1	187437116	187437298	0	1
2	188215730	188216038	308	1	1	1	188215720	188216027	1	1
2	189119622	189120563	941	0	1	0	189119622	189120563	0	0
2	191680794	191680890	96	1	1	1	191680781	191680876	1	1
2	193355414	193355719	305	1	1	1	193355414	193355718	1	1
2	194689502	194698767	9265	1	1	1	194689502	194698766	1	1
2	194914543	194914611	68	0	1	1	194914543	194914611	0	0
2	196031320	196031626	306	1	1	1	196031320	196031625	1	1
2	196051815	196052086	271	1	1	1	196051820	196052090	0	1
2	196179472	196179534	62	1	0	NA	NA	NA	0	1
2	196605324	196605391	67	1	1	1	196605325	196605391	1	1
2	196736415	196736701	286	1	1	1	196736427	196736706	0	1
2	196822263	196822347	84	1	0	NA	NA	NA	0	1
2	196822316	196822400	84	0	1	1	196822316	196822400	0	0
2	19767583	19770565	2982	1	1	1	19767583	19770564	1	0
2	200312455	200312680	225	1	1	1	200312456	200312680	1	1
2	200530388	200530481	93	1	1	1	200530401	200530494	0	1
2	202876858	202876934	76	0	1	1	202876858	202876934	0	0
2	203478490	203478547	57	1	0	NA	NA	NA	1	0
2	205185254	205185319	65	1	1	1	205185258	205185321	1	1
2	20666678	20666986	308	1	1	1	20666678	20666985	1	1
2	206731199	206731523	324	1	1	1	206731199	206731522	1	1
2	206845200	206845317	117	1	1	1	206845200	206845316	1	1
2	206853469	206853650	181	1	1	1	206853492	206853670	0	1
2	20759419	20759485	66	0	1	1	20759419	20759485	0	0
2	208474495	208476798	2303	1	1	1	208474496	208476798	1	1
2	208567227	208567523	296	1	1	1	208567228	208567523	1	1
2	208959109	208959452	343	1	0	NA	NA	NA	0	1
2	209061168	209061489	321	1	1	1	209061168	209061488	1	1
2	209451731	209452059	328	1	1	1	209451719	209452046	1	1
2	211770516	211770586	70	1	0	NA	NA	NA	0	1
2	211770582	211770652	70	0	1	1	211770582	211770652	0	0
2	212161556	212161632	76	1	1	1	212161545	212161617	0	1
2	212551260	212551558	298	1	1	1	212551247	212551544	1	1
2	212700043	212700117	74	1	1	1	212700044	212700117	1	1
2	214507348	214507588	240	1	1	1	214507332	214507571	1	1
2	214775216	214775524	308	1	1	1	214775206	214775513	1	1
2	214778330	214778397	67	1	1	1	214778298	214778364	1	1
2	215728763	215730834	2071	1	1	1	215728763	215730833	1	1
2	217089945	217092499	2554	1	1	0	217089944	217092516	1	1
2	217092804	217093113	309	1	1	0	217092809	217093118	0	1
2	220052328	220052919	591	1	1	0	220052325	220052915	1	0
2	220321615	220321684	69	1	1	1	220321616	220321684	1	1
2	221411074	221411193	119	0	1	1	221411074	221411193	0	0
2	221818648	221818713	65	1	0	NA	NA	NA	0	1
2	221818709	221818774	65	0	1	1	221818709	221818774	0	0
2	223481706	223481996	290	1	1	1	223481692	223481981	1	1
2	223760191	223762685	2494	1	1	1	223760180	223762673	1	1
2	223797367	223797685	318	1	1	1	223797360	223797677	1	1
2	2239124	2239193	69	1	0	NA	NA	NA	0	1
2	226039589	226040061	472	1	1	1	226039584	226040061	1	0
2	227165430	227171170	5740	1	1	1	227165426	227171171	1	0
2	230003698	230003798	100	1	1	1	230003697	230003809	0	1
2	230003751	230003866	115	1	1	1	230003697	230003809	1	0
2	231325309	231325653	344	1	1	1	231325310	231325653	1	1
2	231401465	231401522	57	1	1	1	231401466	231401522	1	1
2	231996195	231996520	325	1	1	1	231996179	231996503	1	1
2	232114516	232114664	148	1	0	NA	NA	NA	0	1
2	232694477	232694861	384	1	0	NA	NA	NA	0	1
2	233930300	233930365	65	1	0	NA	NA	NA	1	0
2	235557233	235558270	1037	1	0	NA	NA	NA	1	0
2	236434545	236434704	159	0	1	0	236434545	236434704	0	0
2	236434712	236434832	120	1	0	NA	NA	NA	0	1
2	237537580	237537734	154	0	1	1	237537580	237537734	0	0
2	237701947	237702010	63	1	1	1	237701947	237702009	1	1
2	238865984	238866038	54	1	1	1	238865963	238866054	0	1
2	238866009	238866084	75	1	0	NA	NA	NA	1	0
2	238962635	238962732	97	1	1	1	238962636	238962730	1	1
2	239833431	239833490	59	1	0	NA	NA	NA	0	1
2	239902397	239902570	173	1	1	1	239902397	239902569	1	1
2	240041609	240041680	71	1	1	1	240041637	240041707	0	1
2	240564810	240564894	84	0	1	1	240564810	240564894	0	0
2	240838458	240838602	144	0	1	1	240838458	240838602	0	0
2	240854075	240854189	114	0	1	1	240854075	240854189	0	0
2	240958954	240959277	323	1	1	1	240958941	240959263	1	1
2	241333969	241334099	130	1	1	1	241333970	241334099	1	1
2	241924761	241924888	127	0	1	1	241924761	241924888	0	0
2	242608434	242608489	55	0	1	1	242608434	242608489	0	0
2	242853261	243035779	182518	1	0	NA	NA	NA	1	0
2	25021857	25021931	74	0	1	1	25021857	25021931	0	0
2	25227622	25227937	315	1	1	1	25227627	25227942	0	1
2	2726278	2726357	79	0	1	0	2726278	2726357	0	0
2	2726437	2726597	160	0	1	0	2726437	2726597	0	0
2	2798774	2799245	471	1	1	1	2798774	2799244	1	1
2	28353927	28354255	328	1	1	1	28353921	28354248	1	1
2	28661666	28661720	54	1	1	1	28661666	28661719	1	1
2	28688919	28688975	56	1	1	1	28688923	28688974	0	1
2	29227778	29227857	79	1	0	NA	NA	NA	1	0
2	29228501	29228621	120	0	1	1	29228501	29228621	0	0
2	29999227	29999303	76	1	1	1	29999228	29999303	1	1
2	3246060	3246169	109	0	1	1	3246060	3246169	0	0
2	3308751	3308820	69	1	0	NA	NA	NA	0	1
2	33091739	33095624	3885	1	1	1	33091738	33095634	1	1
2	33224463	33227291	2828	1	1	1	33224463	33227293	1	0
2	3332227	3332282	55	1	1	0	3332251	3332305	0	1
2	3332801	3332857	56	0	1	0	3332801	3332857	0	0
2	3334876	3335093	217	1	0	NA	NA	NA	1	0
2	34695830	34736561	40731	1	0	NA	NA	NA	1	0
2	36955662	36955978	316	1	1	1	36955668	36955983	0	1
2	3719228	3719384	156	0	1	0	3719228	3719384	0	0
2	3719533	3719949	416	0	1	0	3719533	3719949	0	0
2	3720042	3720276	234	0	1	0	3720042	3720276	0	0
2	3772993	3773126	133	1	0	NA	NA	NA	0	1
2	3885212	3885331	119	1	1	1	3885213	3885331	1	0
2	39071490	39071833	343	1	1	1	39071479	39071821	1	1
2	40446947	40447075	128	1	1	1	40446947	40447074	1	0
2	40882498	40882562	64	1	1	1	40882496	40882559	1	1
2	40978150	40978483	333	1	1	1	40978144	40978476	1	1
2	41973156	41975881	2725	1	1	1	41973156	41975880	1	1
2	43129224	43129555	331	1	0	NA	NA	NA	0	1
2	43359737	43359797	60	1	0	NA	NA	NA	0	1
2	44467109	44468834	1725	1	1	1	44467110	44468834	1	0
2	44636239	44636328	89	1	1	1	44636235	44636323	1	1
2	45642405	45642536	131	0	1	1	45642405	45642536	0	0
2	46312697	46312949	252	1	1	1	46312698	46312949	1	1
2	46433797	46433960	163	1	1	1	46433798	46433960	1	1
2	4781311	4787354	6043	1	1	1	4781293	4787358	1	1
2	48990528	48991165	637	1	1	1	48990527	48991163	1	1
2	50556716	50556799	83	0	1	1	50556716	50556799	0	0
2	51943548	51943622	74	0	1	1	51943548	51943622	0	0
2	51973828	51974241	413	1	1	1	51973829	51974241	1	1
2	5209190	5209517	327	1	1	1	5209180	5209506	1	1
2	54565494	54567472	1978	1	1	1	54565494	54567484	1	0
2	547303	547361	58	0	1	1	547303	547361	0	0
2	5487782	5488050	268	1	1	1	5487770	5488037	1	1
2	553706	553769	63	1	0	NA	NA	NA	1	0
2	55860489	55860663	174	1	1	1	55860500	55860680	0	1
2	56071108	56071399	291	1	1	1	56071108	56071398	1	1
2	56746717	56746803	86	0	1	1	56746717	56746803	0	0
2	57342743	57343071	328	1	1	1	57342733	57343060	1	1
2	57662355	57662421	66	1	0	NA	NA	NA	0	1
2	57662404	57662484	80	0	1	1	57662404	57662484	0	0
2	59644947	59644998	51	1	0	NA	NA	NA	1	0
2	62457109	62457437	328	1	1	1	62457106	62457433	1	1
2	6393337	6393549	212	1	1	1	6393343	6393632	0	1
2	65807519	65807830	311	1	1	1	65807509	65807819	1	1
2	6660509	6660569	60	1	0	NA	NA	NA	0	1
2	6660568	6660626	58	1	1	1	6660569	6660626	1	0
2	69323461	69323519	58	0	1	1	69323461	69323519	0	0
2	70661343	70662176	833	0	1	0	70661343	70662176	0	0
2	71487385	71487879	494	1	0	NA	NA	NA	1	1
2	71996262	71996531	269	0	1	0	71996262	71996531	0	0
2	7338569	7338632	63	1	1	1	7338576	7338639	0	1
2	740216	740279	63	1	0	NA	NA	NA	0	1
2	76526512	76528908	2396	1	1	1	76526513	76528908	1	1
2	76557057	76557292	235	1	1	1	76557058	76557292	1	0
2	76773552	76775442	1890	1	1	1	76773554	76775455	1	1
2	78117891	78118359	468	1	1	1	78117892	78118359	1	1
2	78892015	78892080	65	1	0	NA	NA	NA	1	0
2	79057658	79057995	337	1	1	1	79057648	79057984	1	1
2	79076572	79081209	4637	1	1	1	79076573	79081209	1	0
2	79408044	79408274	230	1	1	1	79408044	79408286	0	1
2	80270214	80270266	52	1	0	NA	NA	NA	0	1
2	8043672	8043769	97	0	1	1	8043672	8043769	0	0
2	83399432	83399483	51	0	1	1	83399432	83399483	0	0
2	84758453	84758747	294	1	1	1	84758451	84758744	1	1
2	85326981	85327289	308	1	0	NA	NA	NA	1	1
2	85335370	85335689	319	1	1	1	85335360	85335678	1	1
2	85939206	85939430	224	0	1	1	85939206	85939430	0	0
2	859720	859903	183	1	1	0	859720	859903	0	1
2	8616813	8617121	308	1	1	1	8616796	8617103	1	1
2	87370725	87370794	69	0	1	0	87370725	87370794	0	0
2	88018912	88018981	69	1	1	0	88018909	88018978	0	1
2	88214806	88215193	387	1	0	NA	NA	NA	1	1
2	88320970	88321218	248	1	1	1	88320969	88321216	1	1
2	88351999	88352065	66	1	1	1	88352016	88352082	0	1
2	88429841	88430156	315	1	0	NA	NA	NA	1	0
2	88429847	88429944	97	1	1	0	88429848	88429945	0	1
2	89871016	89871107	91	1	0	NA	NA	NA	0	1
2	89876860	89877562	702	1	0	NA	NA	NA	0	1
2	89878213	89878599	386	1	0	NA	NA	NA	0	1
2	90408611	90410062	1451	0	1	0	90408611	90410062	0	0
2	90413527	90413683	156	0	1	0	90413527	90413683	0	0
2	90417067	90417252	185	0	1	0	90417067	90417252	0	0
2	90417245	90417393	148	0	1	1	90417245	90417393	0	0
2	90448628	90448748	120	0	1	0	90448628	90448748	0	0
2	90482379	90482798	419	1	0	NA	NA	NA	0	1
2	90483351	90483674	323	1	0	NA	NA	NA	0	1
2	908739	909112	373	0	1	0	908739	909112	0	0
2	91630098	91631549	1451	0	1	0	91630098	91631549	0	0
2	91634833	91635112	279	0	1	0	91634833	91635112	0	0
2	91635000	91635327	327	0	1	1	91635000	91635327	0	0
2	91635279	91635685	406	0	1	1	91635279	91635685	0	0
2	91635473	91635617	144	0	1	0	91635473	91635617	0	0
2	91751063	91759769	8706	0	1	1	91751063	91759769	0	0
2	91997273	91997351	78	0	1	0	91997273	91997351	0	0
2	92039770	92041019	1249	0	1	1	92039770	92041019	0	0
2	92231430	92231650	220	0	1	0	92231430	92231650	0	0
2	92309280	92309618	338	0	1	1	92309280	92309618	0	0
2	9959237	9959588	351	1	1	1	9959223	9959573	1	1
20	11517278	11517602	324	1	1	1	11517278	11517601	1	1
20	13571313	13572844	1531	0	1	1	13571313	13572844	0	0
20	1389146	1390818	1672	1	1	1	1389146	1390817	1	0
20	14529082	14529396	314	1	1	1	14529082	14529395	1	1
20	15301734	15303772	2038	1	1	1	15301733	15303770	1	0
20	15435304	15435469	165	1	1	1	15435302	15435476	1	1
20	16240335	16240753	418	0	1	1	16240335	16240753	0	0
20	17103451	17103796	345	1	1	1	17103452	17103797	1	1
20	19135513	19135569	56	0	1	1	19135513	19135569	0	0
20	21286127	21288810	2683	1	1	1	21286091	21288773	1	0
20	21849903	21850191	288	1	1	1	21849903	21850190	1	1
20	22097667	22097723	56	1	0	NA	NA	NA	1	1
20	2221721	2221804	83	1	0	NA	NA	NA	0	1
20	23103304	23103632	328	0	1	1	23103304	23103632	0	0
20	23755260	23755325	65	1	1	1	23755259	23755324	0	1
20	24873685	24873750	65	1	1	1	24873664	24873730	0	1
20	24903699	24904418	719	1	0	NA	NA	NA	1	0
20	26060821	26061121	300	0	1	0	26060821	26061121	0	0
20	26061327	26061648	321	0	1	0	26061327	26061648	0	0
20	26097379	26098978	1599	0	1	1	26097379	26098978	0	0
20	26107219	26107436	217	0	1	0	26107219	26107436	0	0
20	26112863	26113188	325	0	1	0	26112863	26113188	0	0
20	26128822	26128898	76	0	1	0	26128822	26128898	0	0
20	26134471	26134566	95	0	1	0	26134471	26134566	0	0
20	26134851	26135014	163	0	1	0	26134851	26135014	0	0
20	26149007	26149315	308	1	0	NA	NA	NA	0	1
20	2929350	2934418	5068	1	1	1	2929350	2934417	1	1
20	29434797	29434953	156	1	0	NA	NA	NA	0	1
20	29613246	29614629	1383	0	1	0	29613246	29614629	0	0
20	29812006	29812063	57	1	0	NA	NA	NA	0	1
20	3037880	3038197	317	1	1	1	3037869	3038185	1	1
20	30899237	30899544	307	1	1	1	30899229	30899534	0	1
20	31525493	31529388	3895	1	1	1	31525488	31529390	1	1
20	32815939	32819226	3287	1	1	1	32815930	32819227	1	1
20	33115831	33116165	334	1	1	1	33115813	33116146	1	1
20	33477174	33477307	133	1	1	1	33477208	33477339	0	1
20	33621657	33621979	322	1	1	1	33621657	33621979	0	1
20	35990202	35990274	72	0	1	1	35990202	35990274	0	0
20	366005	379883	13878	0	1	1	366005	379883	0	0
20	3795033	3795455	422	1	1	1	3795029	3795450	0	1
20	38337647	38337785	138	1	1	1	38337634	38337771	1	1
20	42676128	42676528	400	1	1	1	42676129	42676528	1	1
20	43553564	43553742	178	1	0	NA	NA	NA	1	1
20	44535346	44535788	442	1	0	NA	NA	NA	0	1
20	45784692	45784805	113	0	1	1	45784692	45784805	0	0
20	50759206	50760945	1739	1	1	1	50759226	50760963	1	0
20	52478988	52479183	195	1	0	NA	NA	NA	0	1
20	52480228	52480328	100	1	0	NA	NA	NA	0	1
20	53963792	53963870	78	1	0	NA	NA	NA	0	1
20	53963834	53963912	78	0	1	1	53963834	53963912	0	0
20	54434623	54440630	6007	1	1	1	54434611	54440617	1	1
20	54463234	54463552	318	1	1	1	54463234	54463551	1	1
20	54542089	54542156	67	0	1	1	54542089	54542156	0	0
20	55606943	55607014	71	1	1	1	55606915	55607037	0	1
20	5943000	5943330	330	1	1	1	5942990	5943319	1	1
20	59731233	59731294	61	1	1	1	59731234	59731294	1	1
20	60160759	60160869	110	0	1	1	60160759	60160869	0	0
20	60359382	60359569	187	0	1	0	60359382	60359569	0	0
20	60518291	60519471	1180	0	1	1	60518291	60519471	0	0
20	60519616	60519964	348	0	1	0	60519616	60519964	0	0
20	60526302	60526608	306	1	1	1	60526302	60526605	1	1
20	60570638	60570958	320	1	1	1	60570633	60570953	1	1
20	60845666	60845913	247	0	1	0	60845666	60845913	0	0
20	60948264	60948328	64	1	1	1	60948263	60948325	0	1
20	61304250	61305140	890	1	1	1	61304251	61305140	1	0
20	61471004	61471104	100	1	1	1	61471013	61471146	0	1
20	6150959	6151292	333	1	1	1	6150955	6151287	1	1
20	61588439	61588516	77	1	1	1	61588440	61588516	1	1
20	61724699	61725598	899	1	1	1	61724699	61725597	1	0
20	62240943	62241178	235	0	1	1	62240943	62241178	0	0
20	62661039	62661145	106	1	1	1	62661091	62661198	0	1
20	62720072	62720190	118	1	0	NA	NA	NA	0	1
20	62767802	62767856	54	1	1	1	62767827	62767881	0	1
20	62836612	62836698	86	1	0	NA	NA	NA	0	1
20	62909029	62909093	64	1	0	NA	NA	NA	0	1
20	7274350	7274664	314	1	1	1	7274350	7274663	1	1
21	10552753	10552846	93	0	1	1	10552753	10552846	0	0
21	10713032	10713717	685	1	0	NA	NA	NA	0	1
21	10717644	10717815	171	1	0	NA	NA	NA	0	1
21	10718777	10718950	173	0	1	1	10718777	10718950	0	0
21	10719209	10719382	173	0	1	1	10719209	10719382	0	0
21	10723365	10723877	512	1	0	NA	NA	NA	0	1
21	10726187	10726358	171	1	0	NA	NA	NA	0	1
21	10727311	10727823	512	1	0	NA	NA	NA	0	1
21	10733828	10734165	337	1	0	NA	NA	NA	0	1
21	10742380	10743294	914	1	1	1	10742380	10742952	0	1
21	10756508	10757196	688	1	0	NA	NA	NA	0	1
21	10763884	10765929	2045	0	1	1	10763884	10765929	0	0
21	10813988	10814042	54	1	0	NA	NA	NA	0	1
21	10819360	10819585	225	0	1	1	10819360	10819585	0	0
21	10819447	10819755	308	1	0	NA	NA	NA	0	1
21	10830466	10831021	555	0	1	1	10830466	10831021	0	0
21	10842954	10843006	52	0	1	1	10842954	10843006	0	0
21	10853622	10853699	77	1	0	NA	NA	NA	0	1
21	10969156	10969454	298	0	1	1	10969156	10969454	0	0
21	11089796	11092549	2753	1	0	NA	NA	NA	0	1
21	11145597	11145675	78	1	0	NA	NA	NA	0	1
21	14342825	14342998	173	1	0	NA	NA	NA	0	1
21	14650764	14650846	82	1	0	NA	NA	NA	1	1
21	14816840	14818167	1327	0	1	0	14816840	14818167	0	0
21	14925916	14926235	319	0	1	1	14925916	14926235	0	0
21	16257320	16257390	70	0	1	1	16257320	16257390	0	0
21	16588381	16591453	3072	1	1	1	16588381	16591455	1	1
21	21586198	21586367	169	0	1	1	21586198	21586367	0	0
21	21960610	21960672	62	0	1	0	21960610	21960672	0	0
21	23636853	23636920	67	1	1	1	23636870	23636937	0	1
21	23654909	23666004	11095	1	1	1	23654901	23666004	1	0
21	24444756	24444851	95	1	0	NA	NA	NA	1	1
21	24828947	24829266	319	1	1	1	24828961	24829280	0	1
21	25388635	25388687	52	0	1	1	25388635	25388687	0	0
21	26825146	26825414	268	1	1	1	26825133	26825400	1	1
21	30552225	30552580	355	1	1	1	30552225	30552579	1	1
21	30601825	30602166	341	1	1	1	30601818	30602158	1	1
21	31407448	31407520	72	0	1	1	31407448	31407520	0	0
21	33030349	33030400	51	1	0	NA	NA	NA	1	0
21	34144172	34144244	72	1	0	NA	NA	NA	0	1
21	39590542	39590889	347	1	1	1	39590533	39590884	1	1
21	39801434	39801522	88	0	1	1	39801434	39801522	0	0
21	39863889	39863995	106	1	1	1	39863890	39863995	1	1
21	41191491	41191553	62	0	1	1	41191491	41191553	0	0
21	41957261	41957381	120	1	1	1	41957250	41957369	1	1
21	42341848	42341903	55	0	1	1	42341848	42341903	0	0
21	42402896	42403218	322	1	1	1	42402892	42403213	1	1
21	43226204	43227329	1125	1	0	NA	NA	NA	1	0
21	43226828	43227331	503	0	1	1	43226828	43227331	0	0
21	43990375	43990427	52	1	1	0	43990375	43990426	0	1
21	44009237	44010308	1071	0	1	0	44009237	44010308	0	0
21	44340139	44340191	52	1	0	NA	NA	NA	0	1
21	44340189	44340241	52	0	1	1	44340189	44340241	0	0
21	44970368	44973305	2937	1	1	1	44970369	44973305	1	1
21	45002697	45003181	484	1	1	1	45002712	45003196	0	1
21	45635349	45635454	105	1	0	NA	NA	NA	0	1
21	45850301	45850628	327	1	0	NA	NA	NA	1	1
21	46153224	46153289	65	1	1	1	46153228	46153294	0	1
21	46528633	46528697	64	1	1	1	46528632	46528696	0	1
21	46921789	46921964	175	1	1	1	46921859	46922033	0	1
21	47217582	47217751	169	1	0	NA	NA	NA	1	0
21	47235688	47235805	117	0	1	1	47235688	47235805	0	0
21	47235796	47236004	208	1	1	1	47235790	47235998	0	1
21	47306202	47306254	52	1	0	NA	NA	NA	0	1
21	47318201	47318279	78	0	1	1	47318201	47318279	0	0
21	47318466	47318521	55	1	0	NA	NA	NA	0	1
21	47388029	47389733	1704	1	1	1	47388022	47389725	1	0
21	47657352	47658675	1323	1	1	1	47657352	47658674	1	0
21	47804635	47804706	71	0	1	1	47804635	47804706	0	0
21	9437617	9437732	115	0	1	1	9437617	9437732	0	0
21	9483815	9483921	106	0	1	0	9483815	9483921	0	0
22	16092138	16092228	90	0	1	0	16092138	16092228	0	0
22	16093696	16094154	458	0	1	1	16093696	16094154	0	0
22	16995523	16998350	2827	0	1	0	16995523	16998350	0	0
22	17665804	17665861	57	1	0	NA	NA	NA	1	0
22	17770351	17779109	8758	1	1	1	17770352	17779109	1	1
22	18003601	18004259	658	0	1	1	18003601	18004259	0	0
22	18047375	18047734	359	1	1	1	18047362	18047720	1	1
22	18057752	18060459	2707	1	1	1	18057782	18060490	1	1
22	18099532	18099843	311	1	1	1	18099522	18099832	1	1
22	18141697	18144629	2932	0	1	1	18141697	18144629	0	0
22	18283915	18284238	323	1	1	1	18283899	18284222	1	1
22	18977576	18977642	66	1	1	1	18977576	18977641	1	1
22	19155943	19156005	62	1	0	NA	NA	NA	0	1
22	19571619	19573103	1484	1	1	1	19571620	19573103	1	0
22	19947296	19947363	67	1	1	1	19947323	19947390	0	1
22	20950623	20953841	3218	1	1	1	20950624	20953841	1	0
22	22920934	22921023	89	0	1	1	22920934	22921023	0	0
22	23576857	23577814	957	1	1	1	23576857	23577813	1	0
22	24054885	24054957	72	1	1	1	24054884	24054955	1	1
22	24195941	24198514	2573	1	1	1	24195934	24198506	1	1
22	24276436	24279228	2792	1	1	1	24276435	24279226	1	1
22	25277043	25277416	373	1	0	NA	NA	NA	1	1
22	25576006	25576057	51	1	0	NA	NA	NA	1	0
22	26891519	26891656	137	1	1	1	26891520	26891656	1	1
22	27168076	27169803	1727	1	1	1	27168077	27169803	1	1
22	30214411	30214468	57	1	1	1	30214411	30214467	1	1
22	34069806	34069927	121	1	1	1	34069843	34069962	0	1
22	35645167	35646140	973	1	1	1	35645166	35646141	1	0
22	36798036	36798358	322	1	1	1	36798025	36798346	1	1
22	37127089	37127262	173	1	1	1	37127076	37127248	1	1
22	37143176	37147903	4727	1	1	1	37143177	37147904	1	0
22	37905702	37906181	479	1	1	1	37905706	37906185	1	1
22	39607667	39607988	321	1	1	0	39607656	39607976	1	1
22	40566748	40566838	90	1	0	NA	NA	NA	0	1
22	40566816	40566905	89	0	1	0	40566816	40566905	0	0
22	41140126	41142648	2522	1	1	1	41140127	41142648	1	1
22	42498797	42499105	308	1	0	NA	NA	NA	0	1
22	42510765	42510821	56	1	0	NA	NA	NA	0	1
22	42934797	42935920	1123	0	1	1	42934797	42935920	0	0
22	43549312	43549655	343	1	0	NA	NA	NA	0	1
22	43985160	43985211	51	1	0	NA	NA	NA	1	0
22	44510242	44510452	210	1	0	NA	NA	NA	0	1
22	45488363	45488426	63	1	0	NA	NA	NA	0	1
22	45488434	45488497	63	0	1	1	45488434	45488497	0	0
22	45964360	45964509	149	0	1	1	45964360	45964509	0	0
22	45964624	45964694	70	0	1	0	45964624	45964694	0	0
22	46363335	46363387	52	1	1	1	46363335	46363386	1	0
22	47607100	47607554	454	0	1	0	47607100	47607554	0	0
22	47696469	47696866	397	1	1	1	47696461	47696858	1	0
22	47781989	47782200	211	1	1	1	47781990	47782200	1	1
22	48645223	48645542	319	1	1	1	48645212	48645530	1	1
22	49003048	49003475	427	0	1	0	49003048	49003475	0	0
22	49077626	49077903	277	1	1	1	49077627	49077903	1	1
22	49401400	49401498	98	1	1	1	49401388	49401485	1	1
22	49715779	49717445	1666	1	1	1	49715779	49717444	1	0
[truncated: 1,692 more rows]

## Sheet: CHM1.largeINS
Chr	Start	End	Size	Inserted Sequence
1	100994220	100994221	322	TGGCCGGGCGCGGTGGCTCACGCCTGTAATCCCAGCACTTTGGGAGGCCGAGGCGGGTGGATCATGAGGTCAGGAGATCGAGACCATCCTGGCTAACAAGGTGAAACCCCGTCTCTACTAAAAATACAAAAAATTAGCCGGGCGCGGTGGCGGGCGCCTGTAGTCCAGCTACTGGGAGGCTGAGGCAGGAGAATGGCCGTGAACCGGGAAGCGGAGCTTGCAGTGAGCCGAGATTGCGCCACTGCAGTCCGCAGT
1	101770065	101770066	319	ATGGGCCGGGCGCGGTGGCTCACGCCTGTAATCCAGCACTTTGGGAGCCGAGGCGGGCGGATCACGAGGTCAGGAGATCGAGACCATCCTGGCTAACATGGTGAAACCCCGTCTCTACTAAAAATACAAAAAATTAGCCGGGCGTGGTGGCGGGCGCCTGTAGTCCCAGCTACTCGGGAGGCTGAGGCAGGAGAATGGCGTGAACCCGGGAGGCGGAGCTTGCAGTGAGCCGAGATCGCGCCACTGAACTCCAGC
1	102512642	102512643	67	ACCTTTGTCTTCCTTGGACGTGCCTGGGCACCACTTCTGCCAACCTGTGAAGCCATCCTGCCCTGACA
1	103737782	103737783	104	GACCTTAATCACAGGGCATGGTAATACTAAGGGACACCCTAATGGATCTCCTGTACTCCATGCATACTCTTTCTTACCTCCATTCTGGAGTAGTAGACTGATTTC
1	103808318	103808319	237	TTTTTTTGTTTTGTTTTTTTTTTTTTTTTTTTTTTCTTCAAAATATTTTATTTAGTTCTTTGTTAAGCCATCACTTCAACTCCCCTTCCCTAATTACCACCTACCACCTGCCTACCACCTAAGTAAGTACTCAATAACTAATATGATAATAAATAAACGATCAATCTATTGTCAAGGTCTTACCACATTTTTCACTTCCAAAGCTTATACAGATAGATTTATACAACATAAGTCTGCA
1	103948050	103948051	237	TTTTTTTGTTTTGTTTTTTTTTTTTTTTTTTTTTTCTTCAAAATATTTTATTTAGTTCTTTGTTAAGCCATCACTTCAACTCCCCTTCCCTAATTACCACCTACCACCTGCCTACCACCTAAGTAAGTACTCAATAACTAATATGATAATAAATAAACGATCAATCTATTGTCAAGGTCTTACCACATTTTTCACTTCCAAAGCTTATACAGATAGATTTATACAACATAAGTCTGCA
1	104480854	104480855	5280	TTGTTTAAAAGTTTGTAGCACCTCCTCCCTCTCTCTCAGTTCTGCTCCTGCCACGTAAAATGATTGTTCTCACTTTGTCTTCTGCCATGAGTAAAAGCTCCCTGATATCTCCCCAGAAGCAGACGCTGCCATGCTTCCTGTACAGCCAGAGGAACATGAACCAATTAAACCACTTTTTCTTTATAAATTACCTAGTTTTAGATATTTCCTTATACTAATGCAAGAACAGACCGATATAGAAAATTGGTACTGTGG
1	104513429	104513430	231	ATGATAAAAAAATTTTGATTATCTTAATTGATGCAGAAAAAATCTATGATATTCAACATATTTTCATGATAAAAACACTTTAAAAAGTAGAAGGGAACTACTTCAATTTACATATGAAAAATTCATAGTAAACATTATACTTAATATTGAAAGATGGAAAGTTTTCCCTCTAACATCAGAAACAATGCAGGAATACCCTCTTCAACATAGTCCTGTATGTCCTAGCTGAACA
1	104932168	104932169	112	TGTATAGTTTGTTAATATTTTGTTTCATTATGTAGGCTTTACTTCACCCTGTTGATTGTTTTCTTTTGTTTCATACATATTTTGGATATTAAACTCCTATCAGATAATCAGAT
1	105054079	105054080	322	CTATTCTTTTTTTTTTTTTTTTTTTTTTTTTTTTTTTGAGACGGAGTCTCGCTCTGTCGCCCAGGCTGGAGTGCAGTGGCGGGATCTCAGCTCACTGCAAGCTCCGCCTCCCGGGTTCACGCCATTCTCCTGCCTCAGCCTCCCAAGTAGCTGGGACTACAGGCGCCCGCCACTACGCCCGGCTAATTTTTTGTATTTTTAGTAGAGACGGGGTTTCACCATTTTAGCCGGGATGGTCTCGATCTCCTGACCTCG
1	105138651	105138652	326	TAAAAAATGGGCCGGGCGCGGTGGCTCACGCCTGTAATCCCAGCACTTTGGGAGGCCGAGGCGGGGGTGGATCATGAGGTCAGGAGATCGAGACCATCCTGGCTAACAAGGTGAAACCCCGTCTCTACTAAAAATACGAAAAATTAGCCGGGCGCGGTGGCGGGCGCCTGTAGTCCCAGCTACTCGGGAGGCTGAGGCAGGAGAATGGCGTGAACCCGGGAAAGCGGAGCTTGCAGTGAGCCGAGATTGCGCCAC
1	106113957	106113958	2261	TATGGACCATATTCAGTTAATCTTTCCATTATAAGGTTGTATTAAATTAAGTTGCATTAATAAGAATACTTACATAATTTATATATTTCCTAAGAGTATTAATGATAGAGGCCTTTAAAGTTTTCACTTACATTTTTGATCTTTGCTCTGTTTGCACACTAATCTAGAAGGTAAATATGTATAGCTATATTTTTGTGAGTGATGTTATCAAATGGCTTGATATTTTAAAAATGAGAGTATACTACACAATTATTC
1	106330920	106330921	195	CAAAAAATTAGCCGGGCGTAGTGGCGGGCGCCTGTAGTCCCAGCTACTCGGGAAGCTGAGGCAGGAGAATGGCGTGAACCCGGGAGGCGGAGCTTGCAGTGAGCCGAGATCGCGCCACTGCACTCCAGCCTGGGCGATAGAGCGAGACTCCGTCTCAAAAAAAAAAAAAAAAAAAAAAAAAAAAAAAAAAAAATAC
1	106505960	106505961	710	TACGTATATATGTGTGTATATATACGTATATATATACGTATATATGTGTGTATATATACGTATATATATACGTATATATTGTGTATATATAACGTTATATATATACGTATATATGTGTGTATATATACGTATATATACGTATATATGTGTGTATATATACGTATATATATACGTATATATGTGTGTATATATACGTATATATACGTATATATGTGTGTATATATACGTATATATACGTATGTGTGTATATATACG
1	108097968	108097969	51	CATAAAATGTAAAATAAAAAAAAAAAAGAAAGGAAAAAAAAAATAAAATAAA
1	108142470	108142471	313	TCAGGCTCACGCCTGTAATCCCAGCACTTTGGGAGGCCGAGGCGGGTGGATCATGAGGTCAGGAGATCGAGACCATCCTGGCTAACAAGGTGAAACCCCGTCTCTACTAAAAATACAAAAAATTAGCCGGGCGCGGTGGCGGGCGCCTGTAGTCCCAGCTACTCGCGGAGGCTGAGGCAGGAGAATGGCGTGAACCCGGGAGGCGGAGCTTGCAGTGAGCCGAGATTGCGCCACTGCAGTCCGCAGTCCGACCTG
1	10845194	10845195	54	GGAGGAGGGAGGAAGGGAGGGAGGAAGGAAGGGAGGAAGGAAGGAAGGAAGGAAA
1	109232233	109232234	79	CTTCACATTATATATATATATATATATATATATATATATATATATATATATATATATATATATATATATAATATATAATG
1	109719973	109719974	82	CCCGGGCAGAGACGCTCCTCACTTCCCAGACGGGGCAGCTGCCGGGCGGAGGGGCTCCTCACTTCTCAGACGGGGCGGTTGCC
1	11031153	11031154	1901	GCTCACTGCAGCCTCTGCCTCCCGGGTTCCAGTGATTCTCCTGCCTCAGCCTCCTGGGTAGCTGGGATTACAGGTACACACCACCATGCCCTGCTAATTTTTGTATGTTTAGTAGAGATGGGGTTTCGCCATGTTGGCCAGGCTGGTCTTGAACTCCTGACCTCGTGATCCACCCGCCTCGGCCTCCCAAAGTGCTGGGGTTACAGGCGTGAGCCACCGTGCTCGGCCCCAGCCTGTATTTTTTAAAGTACACGT
1	11101794	11101795	270	TAGAAGAATGGGTGGATGGATAGATAGATGGCTGGAAGGATGGATTAATGGGTGGATTGATGGATGGGTAGGATTGGTAGGTAGAAGGATGGGTGGGTGGATAGATGGATAGCTGGAAGGAATGGATGGATGGATGCATGGATACATGGATGGATGGATGGATGGATAGATGGATAGATAGATAGATAGATAGATAGACAGACAGATATGTAGAAGGGTGGGTGGATGGGTAGATAAATAGAAGGATGGGTGGAT
1	111802595	111802596	972	TTTTTGTGGGGAAAAGCAAGAGAGATCAGATTGTTACTGTGTCTGTGTAGAAAGAAGTAGACATAGGAGACTCCATTTTGTTATGTGCTAAGAAAAATTCTTCTGCCTTGAGATTCTGTTAATCTATAACCTTACCCCCAACCCCGTGCTGTCTGAAATGTGTGCTGTGTCAACTCAGAGTTAAATGGATTAAGGGCGGTGAAAGATGTGCTTTGTTAAACAGATGCTTGAAGGCAGCATGCTCCTTAAGAGTCA
1	112032285	112032286	337	GCCGGGCGCGGTGGCTCACGCCTGTAATCCCAGCACTTTGGGAGGCCGAGGCGGGCGGATCACGAGGTCAGGAGATCGAGACCATCCTGGCTAAAACGGTGAAACCCCGTCTCTACTAAAAATACAAAAAATTAGCCGGGCGTAGTGGCGGGCGCCTGTAGTCCCAGCTACTTGGGAGGCTGAGGCAGGAGAATGGCGTGAACCCGGGAGGCGGAGCTTGCAGTGAGCCGAGATCCCGCCACTGCACTCCAGCCT
1	112991996	112991997	317	GGGCCGGGCGCGGTGGCTCACGCCTGTAATCCCAGCACTTTGGGAGGCCGAGGCGGGCGGATCACGAGGTCAGGAGATCGAGACCATCCCGGCTAAAATGGTGAAACCCCGTCTCTACTAAAAATACAAAAAATTAGCCGGGCGTAGTGGCGGGCGCCTGTAGTCCCAGCTACTTGGGAGGCTGAGGCAGGAGAATGGCGTGAACCCGGGAGGCGGAGCTTGCAGTGAGCCGAGATCCTGCCACTGCACTCCAGC
1	113542277	113542278	1840	TCTCCTGCCTCGGTCTCCCAAGTAGCTGGGACTACAGGCATGAGCCACTACGCCTGGCTAATTTTTGTATTTTTAGTGGAGATGGGGTTTCACCATGTTGGCCAGGCTGGTCTCGAACTGCTGACCTCCCAGCGATCCACCTGCCCCAGCCTCCCGAAGTGCTGGGATTATAGGCTTCAGCCACCGTGCCCAGACTATAATATCCTTTATAATAAACCAGTAAGCATAAGTAAATGTTTCCCTGAGTTCTGTGAG
1	113958785	113958786	103	ATTATGTGTAATTAATGACACATATTATTATGTGTAATTAATGACACATATTAATTATGTAATTAATGACACATATTAATTATGTAATTAATGACACATATTAA
1	11433943	11433944	1255	CACACAACACACACCACACACGCCCATCCACACACCACACACCACACACACGACACACACCACACAACACACACCTATCCACACACCACACAACACACACACCCATCCACACACCACACAGCACACAACACACCACACAAATCCATCCACATACCACACACACCACACAACACACCACATACACTCATCCACACACCACACACACACATACATACCCATCCACACACAGCCTACTTGCTCATCCACACTCCCACA
1	116304111	116304112	250	CTTCTCTCCTTCTCCTTCTCCTTCTCCTTCTCCTTTCTTCTTCTTCTTCTTCTTCTTCTTCTTCTTCTTCTTCTTCTCTCTCCTTCTCCTTCTCCTTCTCCTCTCCTTCTCTCTCTCTCTCCTCTCCTCCCTCCCTCTCCCTCCTCCCTCCTCCCCTCCCTCCCTCCCCCTCCCCTCTCCCTCCCTCCCTTCCCTCTTCCCTCTCCCTTCCTTCCCTTCCCCTTCTTCCCTTCTTCTTCTTCTTCTCTTCT
1	116979717	116979718	2154	TAGGAAATATATATATATTAGAAATATATACATAGGAAATATATATATATTAGAAATATATACATAGAAATATATATATATTAGAAATATATACATAGGAAATATATATATATTAGAAATATATACATAGGAAAATATATATATATTAGAAATATATACATAGGAAATATATATATATTAGAAATATATACATAGGAAATATATATATATTAGAAATATATACATAGGAATATATATATATTAGAAATATATACA
1	118861486	118861487	717	GGATATTATATATACGTTATATATATAACACGGATATTATATATACGTTATATATAACACGGATATTATATATCCATGTTATATATATAACACGGATATTATATATCCATGTTATATATATAAAACACGGATATTATATACACATGTTATATATATAAAACACGGATATTATATACACGTTATATATATATAAAACACGGATATTATATACACATGTTATATATATATAACACGGATATTATATACACATGTTAT
1	120679428	120679429	3875	ATATTTTAGCTTCTTTTTTTTTTTTTTTTTCATTTTTTCCATTTTTATTTGATGTTTCCAAATATAAAAAAGTCAGGATGCTTACATCAATTATCTCAAATGAGACCATGCAAAGCAATTCAGTGTATACAACAATCATTTTTCCCCTTCAGTTCTGCTGCTTTATACAACAGTGTGATTGACAGAAAATTGGATGGCATGTGCCTGGTCAGAAAATGTCATCTGTTTACAAAATAACATCATGCAGCACAGTTT
1	12199033	12199034	66	TAACGTGGACAAACCACGGGCTTCAAGGGCCCCATCTGTCCTCCTGCTTCTGCAGAGGGTGGGTGGT
1	1318009	1318010	1391	AGGGGTGGTGGCCTCTGGGTCGTTGCCAGATTGTTGGGAAGGGGTGGTGGCCTCTGGATTGCTAGTGGATTGTTGGGAAGGGTGGTGTCCTCTGGATTGTTACTGGATTGTTGGGAAGGGGTGGTGGCCTCGATTGTTACTGGATTGTTGGGAAGGGGTGGTACCTCTGGATTGTTACTGGATTGTTGGGAAGGGGTGGTGGCCTCTGGATTGTTACTGGATTGTTGGGAAGGGGTGGTGACCTCTGGATTGTTA
1	13442249	13442250	55	AGCAAGAAAGATGAAGAAGGAAGGAAGGAAGAAGGAAGGAAGGAAGGAAGGAAAGA
1	13663097	13663098	71	TGAAGCAAGAAAGATGAAGAAGGAAGGAAGGAAGAAGGAAGGAAGGAAGGAAGGAAAGAAGAGAGAGAGAGA
1	13796650	13796651	662	CAGTCTACTTGGGAGGCTGAGGCAAGAGAATCACTTGAACCTGGGAGGAAGAGGTTGCAGTGAGCCGAGATCGCACCACTGCACTCCAGCCTGGGCAACAAGAGCGAAACTCTGTCTCAAAAAAAAAAAAAAAAAAGAAGGTACTTTTGTCAAGGTAACTGGATATAACTTTTTTTTTTTTTTTTTGAGATGGAGTCTTGCTCTGTCACCCAGGCAGGAGTGCAGTGGCGCGATCTCAGCTCACTGAAAGCTCCG
1	13915493	13915494	100	TATTTATTGAATAGTAGCACTATTCAATTTATTGAATAGTAGCACTATTCAATTTATTGAATAGTAGCACTATTCAATTTATTGAATAGTAGCGCTATTCA
1	142544860	142544861	932	ATTTGTTCCATTTATTTTTATTTTATTTTATTTTACTTTTTTTATTATACTCGATAAGTTTTAGGGTACATGTGCACATTGTGCAGGTTAGTTACATATGTATACATGTGCCATGCTGGTGCGCTGCACCCACTAATGTGTCATCTAGCATTAGGTATATCTCCCAATGCTATCCCTCCCCCCTCCCCCAACCCCACCACAGTCCCCAGAGTGTGATATTCCCCTTCCTGTGTCCATGTGATCTCATTGTTCAAT
1	143152610	143152611	2485	CAAACATTCAGACCCCAGAGCAGTGTTCTGGAATCCTATGTTAAGGGAAAACATTCACACCCCAGCAACAGTGTTCTGGTCCTATGTGAGGGACAAACATTTCAGACCACAGCAGGAGTGTTCTTAAATCCTATGTGAGGACAAACATTCAGACCTCCAGAGCACTGTTCTGAATCCTATGATAAGGGCAAACATTCAGACCCCAACATGAAATGTTCTGGAATCCTATGTGAGGGACAAGCATTAAGACCATAG
1	143446341	143446342	56	AAGCTTACAGCTGCAGATGCTTAAATTAAAAGAAGAAAGATCTCAACCATGCTAAAG
1	144860881	144860882	365	TGTATGTACACACATATACATGTACATATGTATGTACACACATATACATGTACATATGTATGTACACACATATACATGTACATATGTATGTCACACATATACATGTACATATGTATGTACACACATATACATGTACATATGTATGTACACACATATACATGTACATATGTATGTACACACATATACATGTACATATGTATGTACACACATATACATGTACATATGTATGTACACACATATACATGTACATATGTA
1	145017827	145017828	62	TCCTTCCCTCCCTCCCTCCCCCCCTCCCTCCCTCCTCCCTCCTCCTTCCTCCCTTCCTTCTCT
1	145101921	145101922	55	TATTAAAGAATTTTAAATAAATTAAATTTAATAAATTAATTTATTAAATTAAGAAA
1	145152733	145152734	319	TCTTTTTTTTTTTTTTTTTTTTTTTTTTTTTTGAGACGGAGTCTCGCTCTGTCGCCCAGGCTGGAGTGCAGTGGCGGGATCTCGGCTCACTGCAAGCTCCGCCTCCCGGGTTCACGCCATTCTCCTGCCTCAGCCTCCCAAGTAGCTGGACTACAGGCGCCGCCACTACGCCGGCTAATTTTTTGTATTTTTAGTAGAGACGGGTTTCACCGTTTTAGCCAGGATGGTCTCGATCTCCTGACCTCGTGATCGCCC
1	145958216	145958217	9504	GCCGTCCTTTTTTTTTTTTTTTTTTTTTTTGCCGTGAAAGTTCCTTCTTAAATACTGACAGCAAGTTTAGAGCCCATCTCAGATCCCTGGCTGTGCTCCATCAGCCCAACAGCCACAGACCCAAAATTCAAAGTAGCCATGCGCCGAGAGCCCAACCTGCCTGGCCACGCACAGGCCAGCCATGGTCCCAGGAGTGGGCGTGTGCCCCACGACACCACACAGCTGTGTCCCTCCCTTCCATCCCCCACCCACAGG
1	147499933	147499934	9501	TGGGCCTGTCCTTTTTTTTTTTTTTTTTTTTTGCGTGAAAGTTCCTTCTTAAATACGACAGCAAGTTTAGAGCCCATCTCAGATCCCTGGCTGTGCTCCATCAGCCCAAACAGCCACAGACCCAAATTTCAAAGTAGCCATGCGCCCGAGAGCCCAACCCTGCCTGGCCACGCACAAGGCCAGCCATGGTCCCAGGATGGGGCGTGTGCCCCGAACACCACACAGCTGTGTCCCTCCCTTCCATCCCCACCCACA
1	14819162	14819163	414	ACCACACACACACACACACACACACCACACACCACACGCTACACACACCATGCACATACCACAAACCACACACACACCACACACACACCACACATTACACACACACACACAGACACCACACACCACACAAACATCACACACCACAGACACATCACACACACACACACACACCACACATACACAGCACACAGCTCACGCATACACAGCACACACATCACACATACACATACCACATACACACCACACACACACCAC
1	148839512	148839513	906	GAAAACATGTCTTTTAAAAAAAAGCTGCAAATTAACAAGTTAAGTACATATATATTTAAGTTAAAAAAGAAATGGTTATTAATGTATCAATATTTTGTGAACAAAATTTACAAACTATTTGGGATATAAATATAATAATGTCCTTATTCTGTGTAGACACCTAGATTTAGCTATGCCTACCATTTGTTTAGTAAGTACTATGTATCAGACTTGGTGCTGAGATAAAACTTCTATAAATATAATCATTTCAAAGCT
1	149339962	149339963	161	CTGAGATGTGAAACAGAGGTTAGAGTGGAGGTTACTAGCAAGAAGAGAAAGGCGGCGCGTGGCTCAACTGTCATCCATGCTTTGCCGAGCGGGGTCACAGGTCAGAGATCGAGCATCTGGCACACGGTGAACGGCGAGTGCGTGTAGTCCGCTACTCGGAGC
1	149725153	149725154	161	CTGAGATGTGAAACAGAGGTTAGAGTGGAGGTTACTAGCAAGAAGAGAAAGGCGGCGCGTGGCTCAACTGTCATCCATGCTTTGCCGAGCGGGGTCACAGGTCAGAGATCGAGCATCTGGCACACGGTGAACGGCGAGTGCGTGTAGTCCGCTACTCGGAGC
1	1501011	1501012	97	TGGCTCCATGGGAACCGAGACCCAACACCCAAAGGAGTCCCACAGGCTCAGGGGTGGTGCAGGCAGAGAACAGACGTCGCGATGGGCCCGACGGTGCT
1	150962719	150962720	342	TTTTTTTTTTTTTTTTTTTTTTTTTTTTTTCTTTTTTTTTTTTTTGAGACGGAGTCTCGCTCTGTCGCCCAGGCCGGACTGCGGACTGCAGTGGCGCAATCTCGGCTCACTGCAAGCTCCGCTTCCCGGGTTCACGCCATTCTCCTGCCTCAGCCTCCCGAGTAGCTGGGACTACAGCGCGCCGCCACCGCGCCCGGCTAATTTTTTGTATTTTTAGTAGAGACGGGGTTTCACCTTGTTAGCCAGGATGGTCTC
1	152188537	152188538	708	TGGAAGACCAACCGGAGCCAGACCCATGTTGGCCGTAGCTGGAAGAGTGCCCGGAACCGGACCCATGTCGGCCGCGACTAGGAGACTGGCCAGATCCAGAGCCCTGTTGGCCATAGCTAGAAGACTGACTTGAGCCAGAGCCATGCTGACCGTGGCTGGAAGACTGACCTGAGCTAGCTCCATGTTGGCCACAGCTCGATGACTGTCCTGATGCAGAACCATGTTGCCCATGGGTAGAGGAATGACCTGAGCTAG
1	152853467	152853468	87	GTGGGAAGGAGGCCCCTGGCATATGCCTGAGAAGGCTTGGCCATATGCCAGGGGCCTCCTTCCCACAGAGAAATCCTGAGACTTTCTC
1	153060772	153060773	76	TCACCCGACTAAAAACACCCACAGGTGTGGAGGGGCAGGCCACCCCTTCACTTGTGCTGGTATGCCTCCAATTTTTC
1	154511330	154511331	94	AAAAAAAAAAAAAAAAAAAAACTGCCTTAGGAGATTCTGAATAAAAAGGCACCTTATGTGCTTGCCTACAGGGGACCAATTTTTAGCACCGTGGC
1	154686446	154686447	2087	TGTGTGTGTGTGTGTGTGTGTGTGCTCTGTGTGTGTGTGTGGTGTGTGTTCTGTGTGTGGCATGTGTGTGGATTTTGTGTGTGGTTTGTGTGGTGTGTTTTGTGTGTTGCGTGTGTGTGTGTTGTGTGTGGGGGCGTGTGTGTGGTGTGTGTTTGGGGGCATGTGGTGTGTGTGTGGTTTGTGTGTGTGGTGTGTGGGGGGGCCATGTGTGTGTGGGGGTATGTGTGTGTGTGGTTTGTGTGTGTGTGGTATGGT
1	155974399	155974400	311	AGGAGAATCACTTGAACCCGGTGGGCGGAGGTTGCAGTGAGCCAAGATCATGCCGTTGCACTCCAGCCTGGATAAAAAAGTGAAACTCCATCTCAAAAAAAAAAAAAGAATTTCTACAAAGCTGGAAGTAATGGAGCGATTCAGTGAAAGGATGAGAAGTTACCAAGGCTTAGTCCCTTGAGAGAGCAGCTAAGAGTGGGGGAAGCAACGTATGCCAGAGGCAGGAGTACTGGGTCCCGCCCCAACTCCACCACT
1	15641143	15641144	295	GGAGGGTGTGTGAGGGTGTGGATGTGTGTGGGTATGTGGGGGGTGTGGGAGTGTGGAGATGTATGAGTGTGGGTGTGTGAGAGGGTGTGTGTGGGGGTGTATGGGTGTGTAAGCATAGGGGGTGTATGGGTGTGAGTATGGGGGGAGTATGTATGGGTGTGTGGGGTGTGTGTGGATGTGTGGGTGAGGGTGTTGGGAAGGGTGTGTGGGGTGTGGATATGTGTAGGTGTGTGTGGGTGTGTGTGGATATGGGTA
1	156705328	156705329	421	TTTTTTTGAGATGGCGTCTCGCTCTGTTGCCCAGGCTGGAGTGCAGTAGCACAATCTCGGCTCACTACAAGCTCCGCCTCCCGGTTTCACGCCATTCTCCTGCCTCAGCCTCCCGAGTAGCTGGGACTACAGGTACTCGCCACCACGCCCAGCTAATTTTTTTGTATTTTTAGTAGAGACGGGGTTTCACCATGTTCACCAGGATGGTCTTGATCTCCTGACCTTGTGATCTGCCAGCCTCGGCATCCCAAATAT
1	157235732	157235733	137	GGGACTGTTTTTTTTTTTTTTTTTTTTTTTTTTTGAGACGGAGTCTCGCTCTGTCGCCCAGGCCGGACTGCGGACTGCAGTGGCGCAATCTCGGCTCACTGCAAGCTCCGCTTCCCGGGTTCACGCCATTCTCCTGCG
1	157363501	157363502	324	TTTTTTTTTTTTTTTTTTTTTTTTGAGACGGAGTCTCGCTCTGTCGCCCAGGCTGGACTGCGGACTGCAGTGGCGCAATCTCGGCTCACTGCAAGCTCCGCTTCCCGGGTTCACGCCATTCTCCTGCCTCAGCCTCCCGAGTAGCTGGGACTACAGGCGCCCGCCACCGCGCCGGCTAATTTTTTGTATTTTTAGTAGAGACGGGGTTTCACCTTGTTAGCCAGGATGGTCTCGATCTCCTGACCTCATGATCCA
1	159419784	159419785	91	GGAGGTGCCCCCCACTTCCCTCCCGGACCGGGCGGCTGGCCGGGCGGGGGCTGCCCCCCCACCTCCCTCCTGGACGGGGCGGCTGGCCAGGC
1	161005684	161005685	433	ACAGAAGACTAGAAGACTTAAGACAAAACAAAAGAAGGAAATAGGCCCCAGAAGAAACTTCCCAACCTTTCTGAAAACCAAAACGTTTTGGGTATTTGGGGAAAGGGTAACTGACACTATTTGCCAGACTCTCGGTTAGACTCTTTCATGTATTTCAACTTTATCTCCAAATTCAACAATGTCTGGCTAAACTCAGACAGTAATGTGGTAAGATGAGCCCAGGGAGAAAGTGGGATAGCTCTGTGACAGGGAAGC
1	162234227	162234228	51	TTCTCTTCTCTTCTCTCTCTTCTCCTCTCCTCTCCTCTCCTCTCCCTCTCCT
1	162761310	162761311	312	TGTGGCCGGGCGCGGTGGCTCACGCCTGTAATCCCCGCACTTTGGGAGCCGAGCGGCGGATCACGAGTCAGGAGATCGAGACCATCCCGGCTAAAACGGTGAACCCGTCTCTACTAAAAATACAAAAAATTAGCCGGCGTAGTGGCGGCGCCTGTGTCCCAGCTACTTGGAGCTGAGGCAGGAGAATGGCGTGAACCCGGAGGCGGAGCTTGCAGTGAGCCGAGATCCGCCACTGCACTCAGCCTGGCGACAGAG
1	162838515	162838516	112	AGCCCCCAGGACCTCTCCACTGCCTCCTCCACCCCTGTATTTCACTTGGCTCTCCAAATTGACTCAACTCCAGGTAACTTCTCCCACAAAGAGGCCTTCAGTTTCTCCAGTGG
1	16376519	16376520	79	GGGTGCTGTGGGGGTGAAGCTGGGTCCTTGGGGGCCCAGATCACTGCATGGGCATTGTCTGGGCAGGAAAAAATAATGGC
1	164204743	164204744	60	TTAGAGACAGTCTAGGCCAAGGCAGTTATGCTCGCAAATTATACATCATTGTACTTACTGT
1	165505879	165505880	60	ATTTGGAATGAGACAAAAGGACCAAGGTGAGAATTAGGTGAGGACTGCGCCTCTGACTCCA
1	165677461	165677462	82	CAGCAGAGAGAGAGACGGGGAGAGAGGCAGAGAGAGAGAGACGGGGAGAGAGCAGAGAGAGAGAGAGACGGGGAGAGAGGCAG
1	167025829	167025830	1147	ACACACATCACACACCACACACCAGACACATCACACACTCACCATACCACACACTACACACACACCGCACACACACACACATCACACACACCACACACCACACACACTAACACATGCTGCCACACACACACCACACCACATGCACCACACACATTACACATGCCACACACACACCACACACACAACACACACACACATGTACCACACAACTACACACACACACACACACACACACCCCACACATGCACTACACAC
1	167025996	167025997	252	CACACACACTCACCATATGCACCATACACACTACACACACCACACACATCACACTTCGCCACACACACCACACATACTACACACACCACACACATCACACACTCATCACACACACCACATGCATCACACACACTACACACACCATACACACACCCCTCACATACCATACACTACACACAAACACACACACTGCCCCCATACCACACACATATATACCACTCAGACACCCCAGAACACCATACACCACACACAC
1	167175228	167175229	4362	TCCTGAATCAAGTGATCTGCCCACCTCGGCCTCCCAAAGTGCTGGATTAAATGTGTGAGACACCGTGCCTGGCCTTAAGTTTGTTTGTTTGTTTGTTTGTTTGTTTTTTTAAATCCCAGCATATATATAGAGTAGTGATTTAAACACACATACACACACACACACAGAGTAGCTTAAAACATAGTGTTGTGTTCTCTAAAAGTGTGTGCCTTTGGGCTCTGGCCTCTCCCACTCCCTGTGGCAGGCCTCATTTAT
1	167506111	167506112	234	TCCTGGCTAACACGGTGAAACCCCGTCTCTACTAAAAATACAAAAAATTAGCCGGGCGAGGTGGCGGGCGCCTGTAGTCCCAGCTACTCGGGAGGCTGAGGCAGGAGAATGGCGTGAACCCCAGGGGGCGGAGGCTGCAGTGAGCCGAGATTGCGCCACTGCACTCCAGCCTGGGCGACAGCGAGACTCCGTCTCAAAAAAAAAAAAAAAAAAAAAAAAAAAATTTCATTGAGGG
1	16750701	16750702	134	TGGGAGGCTGAGGCGGGCGGATCACGAGGTCAGGAGGTTGAGACCATCCTGGCTAACACGGTGAAACCCCGTCTCTACTAAAAATACAAAAAAAATTAGCCGGCATGGTGCGGGTGCCTGTAGTCCCAGCTACTG
1	168379695	168379696	1136	TGGAGGGGCTGGTGGTGGTGGTGGGGGTAGGTGCAGAGTGAGTGGGGTGGTGAGGGTGGGGGCTGATGTGGTGGTGGGGGCTGGTGGTTGGGGGTGTTGGGGGTGGTGATGGTGGTGGTGGTTGGGGGGAGGTGTGGTGGTGGGGATGAGGGTAGGGAGCTGGAGATGGTGGTGGGGTGGTCGGGTGGGGGGTAATGGTGAGGGGTGATGGTGGGGGTGGTGGTGTGAGGGTGGGGTTGGTGGTGGTGGTAGTGG
1	16851637	16851638	2445	GATGGGGTTTCACCATGTTGTTCTCTTAAATCTTTTCACCTTTTAAGTTTGTCCTTCCTTTCTCCAATTTGCAATAGGGGAGTGTGGCTCGCAGCTAAATAGTAGACTTCTCAGAGCTACTTATTCCTGGAGCCTGGCAGTCTGCAGGCCTGGAGGGGGAGCATCTAGAAAGCAGCCCTCTCTAAGTTGAGAATAACTATGAGAATTGTGGGTTATAAGGCTTTGAGCAGCTCTGGCCTCCCCGTCCTCTTTTGT
1	168694472	168694473	54	CTTTCCCTTTCTTTCCTTTCCTTTCCTCTTTCCTTTCCTTTTCCTTTCCTTTCGC
1	169523408	169523409	96	GTAGGGAGGTCCATTGAGGGTTATCAGAGAAAAGTGAGAGTTTTCTCTGTAATAAAAATTACGTGAATGTACTTTCTATTAAAAATTCAGGGAGGGC
1	169962745	169962746	164	AAGAGGTCTTTCAAGCATCACGCCTGTAATCCCAGCACTTTGGGAGGCTGAGGCAGGCGGATCGCTTGAGGTCAGGAGTTCAAGGCCAGCCTGGCTAACATGGAAACCCTGTCTCTACTAAAAATATAAAAATTAGCTGGATGTGGTGGTGTGCACCTGTAATCC
1	170102101	170102102	58	AATCACCCATGATCCAGACACTGCACTAGACAACAGAGACCAAAAATAGTTTTTCTATT
1	17027912	17027913	63	CCGGCTGTGTGTGCCCCTCCCGGCTGTGTGCGCTCCGTGTGTGCCCTCCCGGCTGTGTGTCCTC
1	170612460	170612461	72	TAGATCTTTTTATATAGATACTTTTTTTATCTTTTATATAGATAAAAAGTATCTTATATAGATACTTTTTATA
1	174906901	174906902	1094	TCAGCTCACTGCAACCTCCACCTCCCAGGTTCAAGCAATTCTCCTGCCTCAGCCTCCTGAGTAGCTGGGATTACAGGCATGTGCCACCAGACCCAGCTAATTTTTTTTTTGTATTTTTAGTAGAGATGGAGTTTCACCATGTTGGTCAGGTTGGTCTCAAACTCCTGACCTCAAATGATCCACCTGCCTCAGCCTCCCAAAGTGCTAAGATTACAGGCATGAGCCACAGTGCCCAGCCTGGTGCTGGTTGATAAG
1	17492714	17492715	837	CCATCCTCACTACCATCCCCACCACCATTTCCACCATTCCCACCACAGTCACCATCACCCCCACCATCCCCATCATCATCCGCACCATCCCACCATCCCCACCACCATCTCCATTACCATCCCCACCACCATCTCCATTACCATCCCCACCACCATCCCCATTACCATCCCCACCACCATTTCCACCATTCCCACCATCATCCCCACCACCATCCTCGTTACCATCCCCACCACCATCCCCATTACCATCCCCAC
1	175200570	175200571	200	CTATTGATTCTAGTTTGGAATTTTACTAGGTGGTATAACAGAAGCAAAAGGATGAAAAAGAATCAAAGATGCTTGCAGAAGAGTGATTCAGATATCTGTATAACCCATGGGATCTAGGTTGCATACAGAAAAAAAGTAGTCAGAAAGGTGTTAATAAAATGTGAGGAAAATGGAGTGATCACACACATGTATAATACATGT
1	175209642	175209643	74	GTATATATATACACCAATATATATCTCATATATATGGTATATATATATATACACCATATATATCTCATATATGTG
1	175619858	175619859	458	GTAGTAATGAGATGGAGGAGAAGGAGTAATGAGGTGGGATGGGGTAGTAATGGGATGGGGAGGGGTAGTAATGAGATGAGGGAGAAGGAGTAATGAGGTTGGATAGGGGTAGTAATGAGGTGGGGCAAGGTAGTAATGAGATGGGGAAGGAGGAGTAATGAGGTGGGATGGGGTAGTAATGAGGTGGGGAGGAGGAGTAATGAGGTGGGAGAGGGGTAGTAATGAGGTGGGGGAGGTGTAGTAATGAAGCGAGGA
1	175620227	175620228	352	GGTGGGAGGGGTAGTAATGAGGTGGGGAAGGTGGAATAATGAGTGGGGAGGGGTAGTAATGAGATGGGGAGGAGTAGTAATGAGGTGGGGGGAGTAATGAGATGGGGAGGGGTAGTAATGAGATGGGGAGGAGTAGTAATGAGGTGGGGAGGGGTAGTAATGAGGTGGGAGAGGGTAGTAATGAGGTGGGGAGGAGGAGGAATGAGGTGGGAGATGGGTAGTAATGAGGTGGGGAGGGGTAGTAAGGAGGTGGGG
1	17615819	17615820	2685	CAAAAAAGAAAAAGAAAAAGAAAACGTGTGTACTCAGCATCTTCTCTTTAAGAAAGGGAACATTCCAAACTCCTCTGCAACCCTATGGGGGACACTTCCCACTCCCCCATACCCAGGATTCGCGCGCTCATCTGAAATTTGCGTTTATCATTCCTTCGCTCCTCTTTATAATTTCCCCATGTGAGTATCCCTGAACTGCATACTGTTTAGTTTTGCCTGTTAGAAATTTTTTCACAGGGCCATGTTAATGGTGGT
1	177388551	177388552	230	TGTTTTGCTTTGTAGACAGACAATTCAATTTGTAGACAGTATTCAATTAAAAGTCCCACAGACCAAGGGCTGTAGTTCAATATCTGTGCTTGTTAGATCCTGGACCTTGACCGGAAATGCAATAACCAATGGAGAATCTGAACATATGTTAAAATGCCTATATCCAAGAATTTTTCCCAAGGAATGATGGCCTGGCAAGCCTAGTGTAGGTGCTGACTTGCTGTCTGCCCT
1	178665452	178665453	65	GATAGATAGATAGATGATAGATAGATGATAGATAGATAGATAGATAGATAGATAGATGATAGATAG
1	179651096	179651097	757	TGCCCAAGCTGGAGTGCAGTGGTGCAATTTCGGCTCACTGCAACCTCCGCCTCCCAAGTTCAAGCGATTCTCCCACCTCAGCCTCCCGAGTAGCTGAGATTACAGGCATGTGCCACTACGTCCAGCTAATTTTTTAAATTTTTGGTAGAGACAGGGTTTCACCACCTTGGCTAGGCTGGTCTGGAACTCCTGACCTCAGGTGATCCGCCCACCTCTGCCTCCCAAAAGTGCTGGGATTACAGGCGTGAGCCATGG
1	180828205	180828206	51	AAATGGAATGGTTTTCTTTTCACCTAAAACCTTTCTCTTCTGGTAATAATTT
1	181105993	181105994	264	TCTGTGTGTGTGCTGTGTCTCTGTGTGGTATGTCTGTGTGTGGTGCGTGTCTGTGTGTGGTGTGTCTGTGTGTGTGGTGTGTCTGTATGTGTGGTGTGTCTGTGTGTGTGGTGTGTCTGTGGTGTGTTTGTGTGTGTGGTGTCTCTTTGTGTGTGTGGTATGTCCATGTGTGTGGTGTGTCTATGTGTGTGGTGTGTCTGTCTGTGGTGTGTCTGTGTGTGTGGTGTGTCTGTGTGTGTGTGGTATGTCTCTGTG
1	18186176	18186177	201	ACAGGAGAGGGAGAGGAGAGAGAGAGAGAGATGGGGGGAGGGGGAGAGGAGAGGGAGAGAGAGATGGGGAGAGGGGAGGGGAGAGGGCGAGGGAGAGGAGAGGAGAAGAGAGAGAGGGGGGAGAGAGACAGATGGGGAGGGGAGGGGAGAGGGAGAGGAGGTGGAGAGGGGGAGAGAGAGATGGGGGAGGGGAAGGGGGAGG
1	18195128	18195129	66	AAAGTAATTGTGGTTTTTGCCATTGTTAATTGCATTATTAATTGCAAAAACCACAATTACTTTTGCA
1	182038127	182038128	341	GGAGGGAGGGAGGGAAGGAAGGAAGGAAAAAGAAAAAGAAAAGAAAAAAGAAAGAGAAAGAAAGAGGCAAGACAATACAGAAAAGAAAGAAGGAAGGAAAAAGAAAGAGAAAGAGGAAAGAGAGAAGGAAGGAAGGAAAGAAGAAAAGAAGACGAGGGGAGCGGGGAGAGGAGGTGGGAGGGGAGGGGGAAGAGGAGGGGAGTGGAAGGAGGGACGGGAGTGGAGAAAGAAGGGGGAGGGGAGAAAGGGAGGGGG
1	182107606	182107607	997	AAATGACAGATTGGAATTTTTTTTTTAATGACCCTTTACCACAGATAGTTTGAGAAGTGCTGTTTTAGGCTGTATCTGAACTTCCCCTTAAGGAAATGCCAGTGTCACAATGGGTGGAGAAGCCATAGGAAAACAAGGAACTGTTTTCTACACCAAAAATACAGTGACTTACTATCTCAAAAATAGGTCTCCATTATGCAGCCGTTACATTAATTCTCTTGAAAAATAAAAATATACCTCCTATTCTAAGGGGAA
1	182420855	182420856	328	AAATCTCCTTGATGTCGCCGGGCGCGGTGGCTCACGCCTGTAATCCCAGCACTTTGGGAGGCCGAGGCGGGCGGATCACGAGGTCAGGAGATCGAGACCATCCCGGCTAAAACGGTGAAACCCCGTCTCTACTAAAAATACAAAAAATTAGCGCGGGCGTAGTGGCGGGCGCCTGTAGTCCCAGCTACTTGGGAGGCTGAGGCAGGAGAATGGCGTGAACCCGGGAGGCGGAGCTTGCAGTGAGCCGAGATTGCG
1	18376132	18376133	4342	TGGTGATAGTGATGGTGATGGTGCTGGTGTGGTGGTGATGGTGCTAGTGGTGGTGATGTTGGTGATGGTGCTGGTGGTGTTGGTGATGGTGATGGTGATAGTGATGCTGGTGATGGTGATGGTGCTGGTGGTGGTGGTGCTGGTGCTGGTGGTAGTGATGATAATGGTGCTGGTTGTGATGCTGGTGATAGTGATGGTGCTGGTGCTGGTGGTAGTGATGCTGGTGATAGTGATGGTGATAGTGCTGGTGGTGAT
1	183856342	183856343	145	AGGAGAGAGAAAGAGAGAAACAAAGAAAGAGAGGGAGGGAGGGAGGGAGGGAGGAAAGAAGGAAGGAAGGAAGGAAGGAAGGAAGGAAGGAAGGAAGGAAGGAAGGAAGGAAGGGAGGAGGGAGGGAGGGAGGGAGGGAGGGACAG
1	186245991	186245992	101	GCCACAAGACCCAGAAATTCCACTCTTAGGTATATTCCACTATTAGGTATATATATATATATATATATATATATATATATATATATATATATATATATATAT
1	1865752	1865753	102	GTACACCTGTGTACCTACAACCTAACACCCACGTGTACACCTGTGTACCTACAACCTAACACCCACGTATACACCTGTGTACCTACAACCTAACACCCACGTA
1	186743205	186743206	56	GTATATATATACACTATATATATACTTTATATATACACATACAGTATATATAAAGTA
1	18792581	18792582	59	GATAGCTGAGTGATTTGAAGACTTGAAACCTCCAAAAACAAAAGAAAAACTGTTCTTAGG
1	188389717	188389718	65	TCCCTCCCCTTCCCCTCCCTCCCTTCCCTCCCCTCCCTCTTCCTCCCTCCCTCCCTTCTTTCCTTT
1	189766179	189766180	54	TATGTATATATGTATATGTATATATGTATGTATATATGTATATATATATATATAC
1	189883351	189883352	334	GCCGGGCGCGGTGGCTCACACGCCTGTAATCCCAGCACTTTGGGAGGCCGAGGCGGGCGGATCACGAGGTCAGGAGATCGAGACCATCCCGGCTAAAACGGTGAAAACCCCGTCTCTACTAAAAATACAAAAAATTAGCCGGCGTAGTGGCGGGCGCCTGTAGTCCCAGCTACTTGGGAGGCTGAGGCAGGAGAATGGCGTGAACACCGGGAGGCGGAGCTTGCAGTGAGCCGAGATCCCGCCACTGCACTCCAG
1	190002857	190002858	117	AATAAGCATTAAAACAGAATGTGATGTGCATCATAGGCAATCCACTAAAAGATTGCAAAGACAGAAAGAAATATCCTCTTTTATAGGCTAAAGAGATACAACCCACTACATACATCTT
1	190796661	190796662	80	GTACCCCATAAACATGTATAACTTGCCAATTAAAACAATTTACAAAAATAAAAAAGAACAATTATATATTTTTGTGAAGAT
1	191203760	191203761	230	AATATATATATATATATTATATATATATTATATATATATATATTATATATATATAATATTATATATATATATATATATATATATTATATATATATATATATAATATATATATATATTATATATATAATATATATATATATATATATAATAATATATATATAATATATATATATATATATATATATATATTATATATATATAATATATATATATATAATATATATATATATG
1	192192251	192192252	297	TATATATGTGTGTATATATGTGTATATATGTATATATGTGTATATATGTATATATGTGTGTATATATATATGTGTATATATGTGTATATATGTATATATGTGTGTATATATGTGTATATATGTGTGTATATATGTGTATATATGTATATATATGTGTATATATATGTGTATATATGTATATATGTTTATATATGTATATATATGTGTATATATGTATATATGTGTGTGTATATATGTATATATGTATATATGTGT
1	19252298	19252299	228	TGGATGGTTGGATGGATGGATGGATGGATGGATGGATGGATGGATGGATTGGTTGGATGGATGGATGGATGGATGGATGGATGGATGGATGGTTGGATGGATGGATGGATGGATGGATGGATGGATGGATGGATGGATGGATTGGTTGGATGGATGGGATGGATGGATGGATGGATTGGTTGGATGGATGGATGGATGGATGGATGGATGGATGGATGGATGGATTGGT
1	19252496	19252497	451	GGATGGATGGATGGTTGATGGATGGATGGATGGATGGATGGTTGGTTGGATGGATGGATGGATGGTTGGATGGATGGATGGATGGATGGTTGGATGGATGGATGGATGGATGGATGGATGGATGGATGGATGGTTGGATGGATGGATGGATGGATGGATGGATTGGTTGGATGGATGGATGGATGGATGGATGGATGGATGGATGGATGGTTGGATGGATGGATGGATGGATGGATGGATGATGGATGGATGGAT
1	19252604	19252605	294	GTTGGTTGGATGGATGGATGGATGGATGGATGGATGGATTGGTTGGATGGATGGATGGATGGATGGATGGATGGATGGATGGTTGGATGGATGGATGGATGGATGGATGGATGGATGGATGGATTGGTTGGATGGATGGATGGATGGATGGATGGATGGATGGATGGATGGATTGGATGGATTGGTTGGATGGATGGATGGATGGATGGATGGATGGATGGATGGATTGGTTGGATGGATGGATGGATGGATGGA
1	193533396	193533397	84	ATATGTGTATATGTATCTTTACACATATATGTGTATATGTATCTTTATATACACATATATGTGTATATGTATCTTTATATACACA
1	19387913	19387914	1584	GGAAGTGATGATGATGATGGTGATGATAGTGACGATGTGATGATGGTCTTGGTGATTTTGATGGTGGTGGTGGAAGTGATGATGATGGTACTGGTGTTGGTGATTATGATGATGATGGCAGTAATGGTGGTGGTGGTGGATGATGATGGTGATGGTGGTGGTGGTGGTGGTGATGGTGGTGGTGGTGGTGATGGTAGTGGTGATGGTGGTGATGGTGGTGGTGGTGATGGTGGTGATGGCGGTGATGGTGGCGGT
1	194445307	194445308	70	CAGTAGGAAGCAAGTTAAAAGATTTTTAACTTGTTCTTTAAATAAAGGGTACAAATTCAACACAACACCAC
1	194595948	194595949	150	TAAAAGACAAAGAACTACTTGGGAGGCTGAGGCAGGAGAATGGCGTGAACCCGGGAGGCGGGGCTTGCAGTGAGCCGAGATCCCGCCACTGCACTCCAGCCTGGGCGACAGAGCGAGACTCCGTCTCAAAAAAAAAAAAAAAAAAAAAAAA
1	194638745	194638746	270	TATATGCTCATACACATATATATGTGTATGTATATATATATATATACACTCATCTACAACTGTCTTAGGTATATTTCACTAACAATGGATCTTCTCAAATTACCAAAGAATTTCTCATATATATATATATATACACACACATATATGTGTATATATATACACACACACGTATATATATATACACACACACATATATGTATATGTGTGTTATATATACATATATGTGTGTGTATATATATACATATGTGTGTGTGT
1	194741637	194741638	1134	TCAAAATGATTTCTTTTTTTTTTTTTTTTTTTTTTTTTTTTTTTTTTTTTTTTTTTTTTTTTTTTTTTTTTTTTTTTTTTTTTTTTTTAGTAGATTTTATCTCATTTTATTGTTATTTTTTTTTTTTTTTTTTATTATACTCTAAGTTTTAGGGTACATGTGCACATTGTGCAGGTTAGTTACATATGTATACATGTGCCATGCTGGTGCGCTGCACCCACTAATGTGTCATCTAGCATTAGGTATATCTCCCAA
1	195084381	195084382	171	TATATATGTATAGGCTTAATTACAAAATTTAAAATGCTCTGTTCTACTTAATATATCATGTAAGCATTTATTTATATATCATGTGTAATTAAATAACTCATTAAATATCATTAAAACTATTATTATTGTTTTAATAATAGCAAGTTGACAGGGATACATATTTCAAATTTGT
1	196779189	196779190	130	TGCGCTTCATTCTTTTTTTTTTTTTTTTTTTTTTTGAGACGGAGTCTCGCTCTGTCGCCCAGGCTGGAGTGCAGTGGCGGGATCTCGGCTCACTGCAAGCTCCGCCTCCCGGGTTCACGCCATTCTCCTGC
1	196780912	196780913	157	CAAAAAATGTAAATACTTCAGCTACTTGGGAGGCTGAGGCAGGAGAATGGCGTGAACCCGGGAGGCGGAGCTTGCAGTGAGCCGAGATCCCGCCACTGCACTCCAGCCTGGGCGACAGAGCGAGACTCCGTCTCAAAAAAAAAAAAAAAAAAAAAAAA
1	196886257	196886258	304	TTTGGCCGGCGCGTGGCTCACGCCTGTAGTCCCAGCACTTTGGAGGCCGAGCGGGTGGATCATGAGGTCAGGAGATCGAGACCATCCTGGCTAACAAGGTGAAACCCCGTCTCTACTAAATACAAAAAATTAGCGGCGTGGCGGGCCTGTAGTCCAGCTACTCGGAGGCTGAGGCAGGAGAATGGCTTGAACCGGGAGGCGAGCTTGCAGTGAGCCGAGATTCGCCACTGCAGTCCGCAGTCCGGCCTGGGCGAC
1	196903543	196903544	2688	AAGGTAAACGCACCAATCAGCACCCTGTCAAAACAGACCAATCAGCTCTCTGTAAAACAGACCAATCAGCTTTCTGTAAAATGGACCAATCAGCAGGATGTGCATGGGCCAGATAAGGGATAAACGCAGGCTGCCCCAGCCAGCAGTGACAACCCTCGGGGGTCCAGTTCTACACTGTTCTTTCCCTCTTTGCAATAAATCTTGCTGCTGCTCACTTTTTGGTTCCACACTGCATTTATGAGCTGTAACACTCAC
1	197011859	197011860	289	TTTTTTTTTTTTTTTTTTTTTTTTGAGACGGAGTCTCGCTCTTGTCGCCCAGGCTGGAGTGCAGTGGCGGCAATCTCGGCTCACTGCAAGCTCCGCCTCCCGGGTTCAACGCCATTCTCCTGCCTCAGCCTCCAAGTAGCTGGACTACAGGCGCCCGCCACTACGCGCCCGGCTAATTTTTTGTATTTTTAGTAGAGACGGGGTTCACCGTTTTAGCCGGGATGGTCTCGATCTCCTGACCTCGTGATCCGCCCG
1	198925747	198925748	68	TATATATATTATAGTATAGTATATTGAAAATATGCTATTGTGAATACTGCTCACAATAGCATATTTTCA
1	201180140	201180141	215	TTCCTAAGGGAATGGGTTCAGGCAGTAAGGCAAGTTTTAGGGATGGTTTAGGGGGTTCTGGAGAAATGGGGTCAGTGAATGAAGCAGGTTATAGGAAGGATTTGGGGGCTCCTAAGGGAATGGGTTCAGGGAGCAAGGCAGGTTTTAGGGATGGTTTAGGGAGTTCTGGGGAAATGGGGTCAATGGATGAGGCAGGTTATAGGAAGGATTTGGGGC
1	201285302	201285303	56	TATCCATCCATCCATCCATCCGTCCGTCCGTACGTCCGTCCGTCCATCCATCCATCC
1	20259425	20259426	326	GTTACCATCACCATAATTATCACCATCAACATCACCATCGGTGCCATCAACATCATCATCATCACCATCACCATCATCATCATCATTACCATTACCATCACCATCATCATCTTCACCATCACCATTGCACCATCACCATTATCATCATCATAATCACCATCAACATCACCATAATAATCATCACCATTATCATCATTATCACCATCACCATCATCATCATCATTACCATTACCATCACCATCATCATCTTCCACC
1	203979752	203979753	87	TCCCTGCCCAAATCTCATATGGAAATGTAATCCCCAATGTTGAAGGTGGGGCCTGGAGGGAGGTGATTGGATCATGGGGTGGATTTCT
1	204164313	204164314	56	ATGATGTGTGTGTATGGGTGTGTGCGTATATATGTGTGTGGTGTGTGTGTGTGCATG
1	205572801	205572802	73	TGTATGTTTCTTTATGGTGCTACATTACCCCTCACCCTGTGGCATTCCCATATCCTATTCCATATTCCCTGTAT
1	206288638	206288639	5912	TTCTATACAATGTCTGGAATCTATGAATAACATCAGTTTCTAAGTTATGAGTTGATTTTTAACTACTGGGTTTAGGCCAGGCAGGCCCAGGCCTGGTTTTGGGCCTGGCGCTGGGCTGCTTGTCTTTGGTTCTACTTCCTTGTTGTTTTTTTCTTAAAAAGAGGTACTGAGTATAAAACAATATAAAACAATATGAGAGGGTCTCTCTCTTCCCTCATTTCCCCTCTTTGAGACTCTCACTTTTTATCAGTGGGA
1	20708963	20708964	442	TACCCCCACCATCACCAACATCACAACAATCATTACCACCATCACTACCTCCACCACCACCATCACCACCACCATCATCAACATCACCACTACCATCACCACCATCACTACAATCATTACCACCATCACTACCTCCACCACCAACACCATCATCATCACCACCACCATCACCACCATCACTACAATCATTACCACCATCACTACCTCCACCACCACCACTATCACTACCACCAACACCATCATCACCACCACCAT
1	207097805	207097806	595	GTGGCTATGAGTGTGTGTGAATGTGTGGTGTGTGGCTATGTGTGTGTGCTATGTGTTGTGTGTGGTATGTAGTTATGAGTGTGTGTCACTGCGTGTGTGTGTGGCTATGAGTGTGTGTGTGCGCACTCTATGCTCTGTCTAGTGTGTGTGTGTGGTTGAGTGTGTGAGTGTGTGGTGTGTAGTTATGAGTGTGTGTGTTCTCTGTCTAGTGTGTGTGTGGTTATGTGTGTGTGATTGTGTGTGTGGTGTGTGTCC
1	207097964	207097965	328	TGAGTGTGTGGTGTGTAGTTATGAGTGTGTGTGTTCTCTGTCTAGTGTGTGTGGTGTGTGGTTATGTGTGTGTGATTGTGTGTGTGGTGTGTGTCCATGAGTGTGTGTGCTCTGTAGAGTGTGTGAGTGTGTGGCGTGTGGCTATGAGTGTGTGTGTGCACTGTGGAGTGTGTGTGTGTGGTGTGTGTGGCTATGAGTGTGTGTGTGTGCTCTGTGGAGTGTGTGTGGTGTGTGGCTACGAGTGTGTGTGTGCTC
1	20790007	20790008	910	TGATAGGTGGTGATGATGGTGGTGATAATGATGGTGGTGGTGATGATAATATTGGTAGTAGTGGTGAGATGGTGGTGATGGGTGATGGTGATGGTGGTGATAATTATGGTAATGATATGATAATGATAGTAGTGGTGGTGGTGTGGCTATGATGGTGATAGCAGTGATGCTGATGATGGTGACAATGTTGTTGTTGGTGTGATGGTGGTGGTGATGATGATGGTGGTGGTGGTGATGGTGGTGATGGTGATAATG
1	2079181	2079182	162	TAGATGGAGAGGTCAGTGGACAGTGGATGGATAGATGGAGAGGTCAGTGGACAATAGATGGATGGATAGATGGAGAGGTCAGTGGACAATAGATGGATAGATGAGAGGTCAGTGGACAATAGATAGATGGATAGACGGAGAGGTCAGTGGACAACAGACGGAA
1	20944742	20944743	322	CAGTGGGCCGGGCGCGGTGGCTCACGCCTGTAATCCCAGCACTTTGGGAGGCCGAGGCGGGCGGATCACGAGGTCAGGAGATCGAGACCATCCTGGCTAACACGGTGAAACCCCGTCTCTACTAAAAATACAAAAAATTAGCCGGGCGAGGTGGCGGGCGCCTGTAGTCCCAGCTACTCGGGAGGCTGAGGCAGGAGAATGGCGTGAACCCCAGGGGGCGGAGCCTGCAGTGAGCCGAGATTGCGCCACTGCACT
1	20950249	20950250	1262	CCAGCACTTTGGGGAGGCCAAGGTGGGTGGATCACGAGGTTAGGAGATCGAGACCATCCTGGCTAACATGGTGAAACCCGTCTCTACTAAAAAATACAAACAATTAGCTGGGTGTGGTGGCAGGCGCCTGTAGTCCCAGCTACTCGGGAGGCGCTGAGGCAGGAGAATGCCATGAACCCAGGAGGCGGAGCTTGTAGTGAGCCAAGATCTCGCCACTGCACTCCAGCCTGGGCGACAGAGCAAGACTCCGTCTCA
1	210163894	210163895	120	CATATATATACGTATATATACGTATATATATACATATATATACGTATATATATACGTATATATATATACATATATATACGTATATATATACGTATATATATATACATATATATATACGTAT
1	211782426	211782427	53	TATATATATATATATATATGTACATATATATATATATGTACATATATATACGTA
1	21292155	21292156	54	AAATGAAAGGGAAAGGGGTATTGAGGCATGATCTAACTTTCATGGGTATTCACAA
1	213714502	213714503	1171	CTCCTATTCCCTGAGACACAACAATATTGAAATTAAGCTAACTAATAACCCTACAATGCCTCTAAAAGTTAAAGTAAAGGAAGTTTCCTGTCTCTTCACTTTAAATCAAAAACTAGGGATGAATGATTACGTTTAGTGAGGAAGGTATGTCCAAAGCAAAGATAGGTTGAAAGCTAGGTCTCTTGCACCAAACTGTTACCAAGTTATGAATGGAAAAAAAAAATCTCTTGAGGGAAAATTAAAAGTGCTACTCCA
1	214882215	214882216	66	AGCAAGCTATGGTTAATTTATTATTGAAAGTTTAAAAAATTAAAACTTTATGAAGTAAAAACCTACA
1	214911003	214911004	325	TTCTTTTTTTTTTTTTTTTTTTTTTTTTTTTTTTTGAGACGGAGTTTCGCTCTGTCGCCCAGGCTGGAGTGCAGTGGCGCGATCTCGACTCACTGCAAGCTCCGCCTCCCGGGTTCACGCCATTCTCCTGCCTCAGCCTCCCGTGTAGTTGGGACTACAGGCGCGCGCCACCATGCCCGGCTAATTTTTGTATTTTTAGTAGAGACAGGGTTTCACCGTGTTAGCCAGGATGGTCTCGATCTCCTGACCTCGTGA
1	216223915	216223916	201	AAGGAAAGGAAAGGAAAGGAAAGGAAAGGAAAGGAAAGGAAAGAAAGGAAAGGAAAGGAAAGGAAAGGAAAGGAAAGGAAAGGAAAGGAAAGGAAAGGAAAGGAAAGGAAAGGAAAGGAAAGGAAAGGAAAGGAAAGGAAAGGAAAGGAAAGGAAAGGAAAGGAAAGGAAAGGAAAGGAAAGGAAAGGAAAGGAAAGGAAAG
1	219247375	219247376	198	GCAGGGCAAGGGAGGCACTGAAGAAAAACTTGTTAAGTAAGAAAAATTTGAGCATGTGCTTTTCCTCAGTGGGAGATGGGAAGGAATAAAAATAATAGAGTTATCCTCTCTCTCTCTAACTCTATTATTTTTATTCCTTCCCATCTCCCACTGAGGAAAAGCACATGCTCAAATTTTTCTTACTTAACAAGTTTTTCTT
1	220186140	220186141	103	CGGTTTAATTCTGGTAGCACTAAGTGGAGGGGAAGGACCAGAGGGCCTCCAGATCCCCTTCACATACTTCAACCAGAACAGCTATGTTTCTGTTTTATTTATTG
1	220749349	220749350	312	GAGGAAGGAAGGAAGGAAAGAAGAAAGGAAGGAGGGAGGGAAGGAAGGAAGGAAAGAAGGAAGGAAGAGGGAAGGAGGGAAGGAAGGAGAGAAGGAGGAGGGAAGGAAGGAGAGAAGTAGGAGGGAAGGAGGAAAGGAGAGAAAGAGGAGGGAAGGAGGGAAGGAGGGAGGGAGGGAGGGAGGAAGGAAGGAAGGACAGGAAGGGGAGAAGGAGGAGGAAGGAGGGAAGGAGGAAAGGAGGTGGGAAGGAGGGAA
1	2212824	2212825	67	TCTCTCTCTCTGAAGATCTCCGCCACCACCTGTCTTCTCACGTGTCTTCTCTCTGAAGATCTCCGCCA
1	221969172	221969173	330	CTAAAAATGAATTTCTTGGCCGGGCGCGGTGGCTCACGCCTGTAATCCCAGCACTTTGGGAGGCCGAGGCGGGCGGATCACGAGGTCAGGAGATCGAGACCATCCTGGCTAACACGGTGAAACCCCGTCTCTACTAAAAATACAAAAAATTAGCCGGGCGTGGTGGCGGGCGCGCCTGTAGTCCAGCTACTCGGGAGGCTGAGGCAGGAGAATGGCGTGAACCCGGGAGGCGGAGCTTGCAGTGAGCCGAGATCG
1	222312226	222312227	63	CACATATATATACACATGCGTATATGTGTATAATGTATATACACATACATATATGTGTATATGT
1	223124811	223124812	77	CCAGGGGTAAAATTATAGCTCTGAGCATCATTTCCCAAAGTGTCTTACTTCGCTGCACATGGCCTATGGTGACCCACC
1	223254538	223254539	4170	GGCATATGTGTATTGCGTGTGGTGGGTATATATATTGCATGGTGTGTGGTATGTAGATATGCGGGTGTGGCGTGAGGTGTTGGTGTGTATGTGGGTGTGTTGTGTGTGGTGGGTAGACACTGTGCAGTGGGTGAGTGTGGTGTGAGGTGTGAGTATGTGGGGTGTGGTGTGCATGTGGCGGGTATGTACTGTGTGGTGTGTGTGTGGGGTATATGTGGTGGGTATATATTGTGTGGTGTGTGGCATGCAGATGTG
1	224200209	224200210	416	TCCCAGTCCATTCCGTTCCATTCCATTTAATTCCATTCGAGTCCATTTCATTCCATTACATTCCACTCCTTTCGAGTTCATTCCATTCCTTTACATTCCATTCCATTCGAGTCCATTCAACTCCATTCCATTCGAGTCCATTCCACTCCATTCCGTTCAAGTCCGTTCCATTCCATTCGAGTCCATTCCATTCCATTGTATTCGAGTCCACTTCATTCCATGCTAATCCATTTGAGTTCATTCCATTCCATTCCA
1	224201256	224201257	130	CATTCCAGTTCCATTCCATTCCATTCCAATCCATTCCTTTCCATTACATTCCATTCCATTCCATTCATTCCATTCCATTCCAGTCTTTTCCATTTCATTCCATTCCATTCCCTTCAATCCATTCCATTCCA
1	224201398	224201399	154	TCGTCCATTCCATTCAACTGTATTCCATTCAGTCCATTCCATTACATTCCATTCCATTCCATTCCATTCCATTCCAGCACATTCCATTCCATTACATTCCATTCGAGTCCAATCCATTCCATTCCATTCCATATCCATTCCATTCCAATTCCATT
1	225272507	225272508	81	ACTTAGAGTATAATAAAAAAAAAAATTAAAAAAATAAATAAATAAATAAATAAATAAAATAAAATAAAATAAAATTAAATTA
1	226415474	226415475	149	AGTAGAGACAGGGTTTCACCATGTTGGCCAGGCTGGTCTCGAGCTCCTGACCTCAGGTCATCTGCCTGCCTTGGCCTCCCAAAGTGCTGGGATTACAGGTGTGAGCCACCACGCCTGGCCTTTACTTTTCAGGGTAGCAAATCCACCATT
1	226810382	226810383	1287	TGCAGGTTACCAACTGGAGAGTGCAGGTTACCAACTGAGTGCAGGTTACCAACTGGAGTGCAGGTTACCAAACTGAGTGCAGGTTACCAACTGGAGTGCAGGTTACCAACTGGAGTGCAGGTTACCAACTGGAGTGCAGGTTACCAACTGGAGAGTGCAGGTTACCAACTGGAGTGCAGGTTACCAACTGGAGAGTGCAGGTTACCAACTGGAGTGCAGGTTACCAACTGGAGAGTGTGCAGGTTACCAACTGGA
1	226810497	226810498	275	GAGTGCAGTTACCAACTGGAGTGCAGGTTACCAACTGGAGTGCAGGTTACCAACTGGAGTGCAGGTTACCAACTGGAGAGTGCAGGTTACCAACTGGAGTGCAGGTTACCAACTGGAGTGCAGGTTACCAACTGGAGTGCAGGTTACCAACTGGAGAGTGCAGGTTACCAACTGGAGTGCAGGTTACCAACTGGAGAGTGCAGGTTACCAACTGGAGTGCAGGTTACCAACTGGAGTGCAGGTTACCAACTGGAG
1	227148090	227148091	321	ATGGTACTTGTGGTGGTGGTACTTGGGTGGTGGCAGTGGTACTTGGTGGTGGTACTTGTGGTACTTGTGTGGTGGTGGTAGTGGTTGGTGGCGGTGGTACTTGGTGGTGGCTGGTGGTGCTTGGTGGTGGTGGTGTACTGTGGTGGTGATGGTACTTGGTGGTGGTGGTGGTGGTATTTGTGGTGGTACTTGGTGGTAACTTGGTGTGGTGGCGGTACTTGGTGGTGGTGGCGGTGGCACTTGGTGGTGGTGTGC
1	227462942	227462943	328	CTTTTTTTTTTTTTTTTTTTTTTTTGAGACGGAGTCTCGCTCTGTCGCCCAGGCTGGAGTGCAGTGGCGCGCGATCTCGGCTCACTGCAAGCTCCGCCTCCCGGGTTCACGCCATTCTCCTGCCTCAGGCTCCCAGTAGCTGGGACTACAGGCACCCGCTACCACGACGCCGGCTAATTTTTTTTTTGTATTTTTAGTAGAGATGGGGTTTCACCGTGTTAGCCCAGGATGGTCTCGATCTCCTGACCTCGTGAT
1	227502453	227502454	135	GGTGGCGCGCGCCTGTAGTCCCAGCTACACGGGAGGCTGAGGCAGGAGAATGGCGTGAACCCGGGAGGCGGAGCTTGCAGTGAGTCGAGATCGCGCCACTGCACTCCAGCCTGGGCGACAGAGCGAAACTCCGTCT
1	227602265	227602266	318	CTTTTTTTTTTTTTTTTTTTTTTTGAGACGGAGTCTCGCTCTGTCGCCCAGGCTGGAGTGCAGTGGCGGGATCTCGGCTCACTGCAAGCTCCGCCTCCCGGGTTCACGCCATTCTCCTGCCTCAGCCTCCCAAGTAGCTGGGACTACAGGCGCCCGCCACTACGCCCGGCTAATTTTTTGTATTTTTAGTAGAGACGGGGTTTCACCCATTTTAGCCGGGATGGTCTCGATCTCCTGACCTCGTGATCCGCCCGC
1	22896934	22896935	93	CATACTTGAGTTCTTTCATGTCCACGTTCAGCTTCTATGGCTCTGAGGACAGAAGGATAATAATATTAATAATGATGATGATAACGACACCAAC
1	22904433	22904434	1283	ACACACAGATGCACACATGCACATGCATACATATGCACACCTACACACATGCCACACACACTCATGCACACATGCACACACAAGCACACTACACTGGCACATGCACACACATGCATACACTCACGCACACATGCACACATACACATGCACACAAACATGCACACATGCACAATACTCAACGCACACATGCGCAAACATGCATACAAAAATGCACACATGCACACATTCATGCACACATGCGTACACTCACGCACA
1	230006666	230006667	298	TGTGTGTTGAGTGTATATGTGTTTGCATGTGTTTCACCTGTGTTATGTGTGCAGGTGTGTGTTGTAGGCATATGTATTGTGTTGTGTGCTGTGTGTGTCATGTGTGTTGTGTGTTGCATGTCATGTGTATTGTATGTATACATGTGTTGTGTTATATGTATGTTTCTGTGTTGTTTATGTATATTGTTACCTGTATTGTATGCATATGTATGTTGTGTTATGTGTATGTGTTCTGTGTGTTGTGTATATATGTGT
1	230107781	230107782	252	CACATGCACTCCACCCACATATATACACCTCACACACATACATCCACACACACCATCCTCACATAAATACATCCACACCACACCCTCATACATGCTAACGTCCTCCACACTGCACACACATATACCACACACACATGCATACACACACCTCATGACCCCACACATACGCATATATGCACATACTCCACACACAGCCCACATACATACACAAACACTCCATTCACATACATACATCCCACACACATGTACATAC
1	230467787	230467788	1061	CACACCACACACACACACACACCATACCCATAACATAGACATGCACGTGTATACACACCACACAAACATACAGACTACACACACACACACTATGTAAACATACATATACACACACCACACACAGACCACACCATGCCCATAACATAGACAAACACGTGTATACACACCACACACAACATACAGACCACACACACCATACAAACTTACCACACAACAATACACACACACCACACCCACCATACCACACATACCATA
1	230691088	230691089	132	CCACCACGCCCAGCTAATTTTTGTATTTTTAGTAGAGATGGGGTTTCATCGTGTTGGCCAGCATGGTCTCGATTCTTCACCTTGTGATCTGCCTGCCTCAGCCTCCCAAAGTGCTGGGATTACAGGCGAGTGC
1	230724592	230724593	59	AGGTGTGCAGGTAAGTAGGTAGGTGTGTAGGTAAGCAGGTAGGTGTGTGGATAAGTAGTA
1	231146975	231146976	417	TGCTGATAGCACAGACTGAGTTATGATAATGCAGACTGAGTGATGATCATGTAGACTGAGTGATGATGGCATACATTCAGTGATGATAGCACACATTGAGTGATGATAGGGCAGATTGAGTGATGATGGTATACATTGAGTGATGATGCTGTACATTGAGTAATGATAGCACAGATTGAGTGATGATAGTGCAGATTGAGTGATGATCATGTAGATTGAGTGACGATGGTGCACACTGAGTGATTATAGCACAGA
1	231337819	231337820	380	CTCTTCCACCTCCTCCTCCTCCACTATGTCCTCCTCCTCCATTACCCCCTTCTCCTGCTCTACTACCTCCTTCTCCTCCACTATCTCAGCCACCACTTCCTCCTCTTCCACCTCCTCCTCCTCCTCCACTACCTCCTCCTTCTCCGCTACCTCTTCCTCCTCCTCCATCTCCTCCTCCTTCTCCATTATCTCAGCCACCACCTCCTCCTTTTCCACCTCCTCCTCCTCTCCTCCATCTCCTCCTCCATGACTACC
1	231526810	231526811	70	GTGTGAGAGAGACAGGGAACTCATTCTGGTGTGTGTGTGTGTGTGTGTGTGTGTGTGTGTGTGTGTGTGAG
1	232252316	232252317	438	TGTGCCACCACGCCTGGCTAATTTTTTCTATTTAGTAGAGACGGGGTTTCACCATGTTGGTCAGGCTGGTCTCAAACTCCTGACCTCAGGTGATCCACCCTCCTCAGCCTCCCAAAGTGCTGGGATTACAGGCATGAGCCACTGCGCCTGGGCCCCTATGTTTAACTTTGAGGCTCCACCAAACTGTTTTCCACAGCAGCTGCACCATTTCACATTCTCACCAGTAACATATGAGGGTTCCAATTGTTTTACATG
1	232447861	232447862	83	TTCACAGGATACTTTCAAAATATAATTTTAACTATGTGAATCACCTGAAGAAATTCCTATAATGGTTCAAATTCTGTCATAATG
1	232587773	232587774	308	TTGCCGGGCGCGGTGGCTCACGCCTGTAATCCCAGCACTTTGGGAGGCCGAGGCGGGCGGATCACGAGGTCAGGAGATCGAGACCATCCTGGCTAACACGGTGAAACCCCGTCTCTACTAAAAATACAAAAAATTAGCCGGCGTGGTAGCGGGCGCCTGTAGTCCAGCTACTCGGGAGGCTGAGGCAGGAGAATGGCGTGAACCCGGGAGGCGGAGCTTGCAGTGAGCCGAGATCCCGCCACTGCACTCCAGCCT
1	23276944	23276945	256	AGTGGTGCAATCACAGCTCACTGCAGCCTCGACCTCCGGAGTTCAAGCAATCCTCCCACCTCAGCCTCCCCAGTAGCTGGGATTATAGGCACACACCACCAAACCTCTAATTTTTGTATTAGAGATGTATTAGAGATGAGGGCTCACTCTACAGAAGATACAAAAGTTAGCCAGGTTTGGTGGTGTGTGACTATAATCCCAGCTACTGGGGAGGCTGAGGTGGGAGGATTGCTTGAACTCCGGAGGTCGAGGCTG
1	232869269	232869270	418	ACGTAAGCAAAAACAATTCTTTTTCAGAGGGTTAAAAATAAATAGCCACTTAACCACACAAGGGTTAAAGTATTTCAAGTGATTTAAAATACAGTAACTTGACTGACTGTCCCAAGTGGGATATATCCTAATGGTAAAAAGAAACTCTAGAGAATTTTTTTTTTTTTTTTGAGATGGAGTCTCATTCTGTCGCCAGGCTGGAGTGCAGTGGCGCGATCTCAGCTCACTGCAACCTCCGCCTCCCAGGTTCAAGCA
1	234343189	234343190	2698	CCTTCTTTCTTCCTCCTCCCTCCTTCCTTCCTCCCTCCGTCCTTCCTTCCTTCCTCCCTTCCTCCTCCTCTTCCTCTCCTCCCTCCTTCCTGTTTTCTTCTTTCTTTCCTTCCTTCTTCCTTCCTCCCCCTCCTTCCTTCCTCCCTCCCTCCTTCCTGTTTTCTTCTTTCTTCCTTCCTTCTTCCTTCCTCCCCCTCCTTCCTTCCTCCCTCCCTCCTTCCTGTTTTCTTCTTTCTTTCCTTCCTTCTTCCTTCC
1	234384056	234384057	361	CCATTGTTTGGTGGGTTGGTTGGTTGGTCCATTGCTTGGTGGGTTGGTTGGTTGGTCCATTGCTTGGTGGATTGCTTGGCTGGTCCATTGTTCAGTAGGTTGGTTGACTGGTTCGTTGTTCGGTGGGTTGATTGGCTGGTCCATTGTTTGGTGGGTTGAATGGCTGGTCTGTTGTTCAGTAGGTTGGTTGGCTGGTCCATTGTTTGGGGGCTGGTTGGCTGGTCAGTTGTTCTGTGGTCGGTTGGCTGGTGCATT
1	235573140	235573141	3840	TCGAGACCAGTCTGTCCAACATGACGAAACCCCGTGTCTACTAAAAATGCAAAACTTAGCCGGGCGTGGTGGTGGGCACCCATAATCCCAGCTACTTGGGAGGCTGAAGCACGAGAATCGCTTGAACCCAGGAGACAGAGGTTGCAGTCAGCTGAGATTGTGCCACTGCACTCCAGCCTGGGTGACAGAGCGAGACTCCATCTCAAAAATAAATAAACAAATAAATAAAAAGTGTAAATTTAGGACAGAAATGCA
1	235575481	235575482	64	TCCTCCCCTTCCCCCTCCCCCTCCGCTCCTCCTCGCCCCTCCGCCCCTCCCCATCCCCTCCCTTC
1	23603766	23603767	7438	TTGCAGTGAGCCAGGAGCACACCACTGCACTCCAGCCTGGGCAATAGAGCAAGACTCAGTCTTTTTTTAAAAAAAAAAAAAAAAAAGCATTATTATCTTCTCAAACGTAAGAGTCACACTTTTTGGACCACAGGTGAATAATTCTGCAGACTAATACCATAATGGCACTCATCATAGGTCCTCCTGAGGACTGAATCTGGATGAAGATGTTAGTAACTGTGAATGTGTGAGTTCTATGAAAGACACAGGAAAGTC
1	236661506	236661507	1102	CCCAGCACTTTGGGAGGCTGAGGTGGGTAGATAACATGAGGTCAGGAGATCGAGACCATCCTGGCTAACAGTGAAACCCCGTCTCTACTAAAAGTACAAAAATTAGCCGGGCGTCGTGGCGGACGCCTGGAATCCCAGCTACTCGGAGGCTGAGGCAGGAGAATCGCTTGAACCCAGGAGGTGGAGCTTGCAGTGAGCTGAGATGGCGCCACTGCACTCCAGCCTGGGCGACAGAGCAAGACTCCATCTCAAAAA
1	23718902	23718903	457	GATGTGTGGAGTGTGTGTGTGTATGATGTGTGGAGTGTGTTTTGTGTATGATGTGTGGAGTGTGTATTGTGTATGATGTGTGGAGTGTGTGTGTATGATGTGTGGAGTGTGTATTGTGTATGATGTGTGGAGTGTGTATTGTGTATGATGTGTGGAGTGTGTGTGTGTGTGTATGACGTGTGGAGTGTGTGTGTATGATGTGTGGAGTGTGTGTGTATGATGTGTGGAGTGTATGTGGTGTGTATGATGTGTGGA
1	237952831	237952832	64	ATAATAGAACTATACCTGCAGCCATGACCTATAATAGAACTATATCTGCAGCCATGACCTATAAT
1	238214980	238214981	274	CACACACCACAATACACACACTACATACACACACACACACTACATGTACACCACACACACACCACACTATACACACACGAACACATATAACACAAATACATACACCACACAAATACACCACACACACCACAGACACATATACCACATACCTACATGCACATACCTCACATACACTCCACACACCACACATACCATCCACACACAAAACACACACACAGTACATATACCACACATTCACACACAAATATACAACAC
1	23821716	23821717	65	TCGTAATTGTCCTAGGCCTATTACTCCTCACATCGTAATTGTCCTAAGCCTGTTACTCTTCACATC
1	239780157	239780158	314	TGAATATTTTTTTTTTTTTTTTTTTTTTTTGAGACGGAGTCTCGCTCTGTCGCCCAGGCCGGACTGCGGACTGCAGTGGCGCAATCTCGCTCACTGCAAGCTCCGCTTCCCGGGTTCACGCCATTCTCCTGCCTCAGCCTCCGAGTAGCTGGACTACAGGCGCCCGCCACCGCGCCCGGCTAATTTTTTGTATTTTAGTAGAGACGGGGTTTCACCTTGTTAGCCAGGATGGTCTCGATCTCCTGACCTCATGAT
1	242084000	242084001	139	GGAGTATTGCTTGATCCCAGGAGTGTGAGACCAGCCTGGGCAACTTAGCAAGATCCTGTTCCTTCCAAAAAAAGTATAAAAAATTGGCTGGGCGCAGTGGCTCATGCCTATAATCCCAGCACTTTGGAAGGCCAAGGTGG
1	24210837	24210838	2151	AGAGGCGTGAGCCACTACACCTGGCTATGTATACTTTAGTGATTATTTTTCCTCAAAACATTAAATATTAAAACACTAAAGTAGTTACAATTGAAAAATTGAAAGTTAAGTGTATTAAAACTTAAAATATTACTTTACTATTATTATTTAAAATAGAGGCCGGATATGGTAGCTCACACCTATAATCCCAGCACTTTGGGAGGCCAACGCTGGCAGATCACTTGAGGTCAGGAGTTTGAGATCAGCCTGGCCAAC
1	242311574	242311575	6077	GGCTTGGGGGAGGAGCCAAGATGGCCGAATAGGAACAGCTCCGGTCTACAGCTCCCAGCGTGAGCGACGCAGAAGACGGGTGATTTCTGCATTTCCATCTGAGGTACCGGGTTCATCTCACTAGGGAGTGCCAGACAGTGGGCGCAGGCCAGTGTGTGTGCACACTGTGCGCGAGCCGAAGCAGGGCGAGGCATTGCCTCACCTGGGAAGCGCAAGGGGTCAGGGAGTTCCCTTTCCGAGTCAAAGAAAGGGTTG
1	242467337	242467338	818	TCTTTTTTTTTTTTTTTTTTTTTTTTTTTTTTTTTTTTTTTTTTTTTTTTTTTTTTGTGAAATCTGATTTATTCAACTATTGCCATTAACAACCAATTACAAACACTTATAGCAACAGAGAAAATATATGTTTCATAAACAAACAAAAAATACAAACTACAAGCATACTCCTAATAATACTTACACATGTGTAAGTTTGATGGATAAAAATGAGATAGCACTATATATGTATAAAAAATTAAAAATGTTTCATTG
1	243119891	243119892	394	TCGCCCAGGCTGGACTGCAGTGGCGCGATCTCGGCTCACTGCAAGCTCCGCCTCCCGGGTTCATGCCATTCTCCTGCCTCAGCCTCCCGAGTAGCTGGACTACAGGCGCCCGCACCACGCCCGGCTAATTTTTTGTATTTTTAGTAGAGACGGGGTTTCACCGTGTTAGCCAGGATGGTCTCCATCTCCTGACCTCTTGATCCGCCCGCCTTGGCCTCCCAAAGTGCTGGGATTGCAGGCGTGAGCCACCGCGCC
1	244162080	244162081	100	TGTGTGTATGTGAGTCTTTGTGTGGATGTGTGTATGTCTGTGTGTGTCTACGTGTGTATGTGAGTCTTTGTGTGGATGTGTGTATGTCTGTGTGTGTCTAC
1	244426786	244426787	121	GGGGGGAGGGAGGAAGGAAATACCGGAGGGAGGAAGGAAATACCGGAGGGAGGGAGGAAAGGGGGGAGGGAGGAAGGAAATACCGGAGGGAGGCAGGAAAGAAGGAAGGGAGGGAAAAAGGG
1	244881987	244881988	64	ATGTGTATGTGTATATGTGTGTGTGTGTGTGTGTGTGTGTGTATGTGTATATGTGTGTGTGTGTG
1	2454252	2454253	557	ACTGTGTGTGCTATAGTGACTTAACGGAGGGCACCGTGTGTGTTATAGTGACTTAACGGAGGGCACCGTATGGTGCTATAGTGACTTAACGGAGGGCACTGTGTGTGTTATAGTGACTTAACGGAGGGCACCGTGTGTGTTATAGTGACTTAACGGAGGGCACCGTATGGTGCTATAGTGACTTAACGAGAGGCACCGTATGGTGCTATAGTGACTTAACGGAGGGGACCGTGTGTGGTGCTATAGTGACTTAAC
1	245961702	245961703	455	TGAGTATGTGTGTGTATGTGTGTGTGTGGGTATGTGTGTGTATGTGTGTATTTGTGTGTGTGTATGTGTGTATTTTTGTATGTGTATGTGTGTATTTGTGTGTTTGTGTGTATGTGTATTGTGTGTGTATGTGTGTGGGTGTGTTATGTATGTGTGTGTATTTGTGTGTGTGTGTGTGTATGTGTGTTTGTGGGTGTGTGGGTATGTGTGTGTGGGTATGTGGGTGTGTGTGTGTATGTGTATTTCTGTGTGTGT
1	245989313	245989314	326	GCATGCTAGGCTGGGCGCGGTGGCTCACGCCTGTAATCCCAGCACTTTGGGAGGCCGAGGCGGGCGGATCACGAGGTCAGGAGATCGAGACCATCCCGGCTAAAACGGTGAAACCCCGTCTCTACTAAAAATACAAAAAATTAGCCGGGCGTGGTGGCGGGCGCCTGTAGTCCCAGCTACTTGGGAGGCTGAGGCAGGAGAATGGCGTGAACCCGGGAGGCGGAGCTTGCAGTGAGCCGAGATCCCGCCACTGCA
1	246173277	246173278	388	CAGCTAATTTTTGTGTTTTTAGTAGAGACGGGTTTCACCATGTTGGCCAGGCTGGTCTTGAACTGACCTCATGATCTGCCTGCCTCGGCCTCCCAAAGTGCTGGGATTACAGGCGTGAACCACTGTGCCCGGCCAAGATCATGTTTTATATAAAGTTTGTTATAAAGTTCTCTTGGTATTATCCCCAATAACAAAAACTTTAAGAAAAAAAAACAGTATTTTTGGCCGGGCACAGTGGCTCATGCCTATAATCCC
1	246219973	246219974	326	CTGGCCGGGCGCGGTGGCTCACGCGCCTGTAATCCAGCACTTTGGGAGGCCGAGGCGGGCGGATCACGAGGTCAGGAGACCGAGACCATCCTGGCTAACACGGTGAAACCCCGTCTCTACTAAAAATACAAAAAATTAGCCGGGCGCGGTGGCGGGCGCCTGTAGTCCCAGCTACTCGGGAGGCTGAGGCAGGAGAATGGCGTGAACCCGGGAGGCGGAGCTTGCAGTGAGCCGAGATCGCACCACTGCACTCCA
1	246363428	246363429	183	TAATAGAGAAGATAGAGGACAGTGTAGACGCTGAGCAAGAATGTACACAGACACCCACTGTGATAGAGAAGATAGAGAACAGTGTAGATGCTGAGCAAGAATGTACACAGATGTCCACTGTGATAGAGAAGATAGAGGAGAACAGTGTAGATAATGAGCAAGAATGTACAGAGATTTCCACTGT
1	246592339	246592340	323	CTTTTTTTTTTTTTTTTTTTTTTTTTTTTTTTTTTGAGACGGAGTCTCGCTCTGTCGCCCAGGCTGGAGTGCAGTGGCGCGATCTCGCTCACTGCAAGCTCCGCCTCCCGGGTTCACGCCATTCTCCTGCCTCAGCCTCCCGAGTAGCTGGGACTACAGGCGCCCGCTCACCACGCCCGGCTAATTTTTTGTATTTTAGTAGAGACGGGGTTTCACCTTGTTAGCCAGGATGGTCTCGATCTCCTGACCTCGTGA
1	246739511	246739512	419	TGGGTGACAAGAGCGAGACTCTGTCTCAAAAAAAAAAAAAAAAAAAAAAAAGATTTCAGTGCTCAAGGTTGTATTTCTGTTTATAACTGGTGGGGGGGGGGAGTTAAATTAATTTTGCCTTTGGGACAACATCACATCATGTTTTAGAAACAAACATTTCTCGGCCGGGCGCGGTGGCTCACGCCTGTAATCCCAGCACTTTGGGAGGCCGAGGCGGGCGGATCACGAGGTCAGGAGATCGAGACCATCGTGGCT
1	246806141	246806142	915	GTGGTGGTGATGATGATGATGGATGATGATGATGATGATGATGATGGTGATGATGATGGTGATGATGGTGATGATGATGTGATGATGAGGATGATGATGATGATATGATGGTGATGATGATGGTGATGATGATGGTGATGGTGATGATGACGGTGATGATGGTGATGGTGATGATGTGGTGATGAGGATGATGATGGTGATGATGATGATGGTGATGATGAAGGATGATGATGGTGATGATGGTGTGATGATGGT
1	246873720	246873721	54	AAGAGGGAGCAGGCACATCACATGGCGAGAAGCTTACCATCATGGCGGAAGGCGA
1	246949116	246949117	61	CTCCTGAGTCCCGTCCCCATGGATCTTCACCTCCTGAGTCCCTTCCCCGTGGATCCTCACCT
1	247252116	247252117	60	CCCCACCCCCAACTCCACAAGCTGCTGACCTCCATCATAGTGCCATGCCACGTGCCAACAC
1	247568986	247568987	82	GAGGCCAGGAGTTCAAGACCAGCCTGGGCAATGTAGCGAGACTCCCTCTCTACAAAAAATTTAAAAATTAGCTGGATCATTTA
1	247752621	247752622	333	TAAAAAAAGGGCCGGGCGCGGTGGCTCACGCGCCTGTAATCCCAGCACTTTGGGAGGCCGAGGCGGGCGGATCACGAGGTCAGGAGATCGAGACCATCCTGGCTAAAACGGTGAAACCCCGTCTCTACTAAAAATACAAAAAATTAGCTGGGCGTAGTGGCGGGCGCCTGTAGTCCCAGCTACTCGGGAGGCTGAGGCAGGAGAATGGCGTGAACCCGGGAGGCGGAGCTTGCAGTGAGCCGAGATCCCGCCACT
1	249069906	249069907	60	GGGGCGTCAGATACTGGCAGGAGCCAATGTCTTCTTTGCATAAGACTGATTAACTTGAGTT
1	25328556	25328557	92	ATATAATATATGTTATATACTATATTATAACATATATGTTATATACTATATTATAACATATATGTTATATACTATATTATAACATATATGTTA
1	25614267	25614268	107	GGGAAGTGACAAAGGGCACCCTGGGGATTTCAAATGGTGGTGCCCTGGTTTGGTGTTGCTGCCAGGTGAGTCCTTAAGCTATAGCAATGAGCTATGATTGTACCACTG
1	25732084	25732085	107	GCAATGAGCTATGATTGTACCACTGGGAAGTGACAAAGGGCACCCTGGGGATTTCAAATGGTGGTGCCCTGGTTTGGTGTTGCTGCCAGGTGAGTCCTTAAGCTATAG
1	25855992	25855993	973	GTTTGTATTGTGTGTATGAGGGTTGTGTGCTGTGTGTTGTGTATATATTGTATGTGTTATGTGTATGTATGTCGTATGAGTGTATTCTGTATATGTGTTTTGTGTGGTCTATTATGTATGTGGCATGTGTTGTGTATGTGTGTTGTGTGTGATGTGTTGTATGTGTGTTGTGCATATATGTTGTTTCTGTGTATGTATGTTATGTGTATGTGTATGTTGTGTTGTATGTATGGGTTGTGCCTATGTGCTGTGTTG
1	26077848	26077849	58	CATGGAAGGAGAATGATGGAAGGATGGATGGAAGGAGAAAAAGACAGAAGAAAAGGTGG
1	26094761	26094762	95	TGAGGGGAGTGTGGGTGTGTGGGTCTGTGTGTGTGAGGGGAGTGTGTGTAGGGAGAGTGTATGTAATGTGTGTGGGGTGTGTGTGAGGGGAGTGTG
1	27356987	27356988	723	AAAAATTAGCTGGGTGTGGTGGTGCGTGCCTGTAATCCCAGCTACTCTGGAGGCTGAAGCAGGAGAATCGCTTGAGCCCTGGAGGTGGAGGTTGCCAGTGAGCCGAGATCGTGCCACTGCACTCCAGCCTGGGCGACAGAGCGAGACTCCATCTCAAAAAAATAAAGTAAAATAAAAAATAAAAAAAGAGAGAGAGACATTATAGATTCTTTTTCTTCTCTTTCTTTTTTTTTTTTTTTTTTTGAGACGGAGTCT
1	27412991	27412992	1166	GTATGTGTCGGGGGAGTGTGTGTGTGGCATGTGGTTGTGTGTGTGTAGTGTGTGGTGTATGTGGTGTGTGTGGTATGTGGGGTGTGTGGTGTGTGATTTGTGCATGGTGGTGTATATAGTGTGTGTGTTGCATGTGTTGTGTGTGTGGTGTTTGGTGTATATGGTGTGTGTGTGGTTTGTGTGTTGTGTGTGTGGTGTGGGCTGTATGGTGTGTGGTGTGTACTGCGTGTGTGGTGTTGTGTGTATGATGTGTAT
1	27433713	27433714	1195	GTGGAGGTGCTGGGTGTGTGTGTAGTGTATTGTGTGAAGGGGCTTTGTGTGTGTGTATGTGTGTAGGGGCTGAATGTGTGTGTGTAGGGGCTGGGTGTGTGTGTGAAGGGGCTGGGTGTGTGTGTGTGGAGGGGCTGGGAGGGGAGGGGCTGGGTGTGTGTGTGAAGGGGCTGGGTGTGTGTGTGTGGAGGGGCTGGGAGTGGGAGGGGCTGGGTGTGTGTGTGTGGAGGGGCTGGGAGTGGGAGGGGCTGGGTG
1	28204984	28204985	1383	CTGGCTCACGCCTATAATCCCAACACTTTGGGATGGGAGGCTGAGGCAGGAGAATTGCTTGAACCCAGGAGTTCCAGAGCAGCTTGGGCAATATAATGAGACCTCATCTCTACAAAAAATTTAAAAATTGGCCAGACACGTTGGCTCACACCAGTAATCCCAGCACTTGGGAGGCCGAGGCGGGCGGATCGCTTGAGCTCAGGAGTTGGAGACCACACTAGGCAATATGGTGAAACTCTGTCTCTACCAAAAATA
1	28717658	28717659	789	GATTACACGCATGAGCCACCACGCCCAGCCTATTATTATTATTTTTATTATTATTTTTTGAGACAGAGTCTCACTCTGTTGCCCAGGCTGGAGTGCAGAGGCGCCATCTCGGCTCGCAACCTCTGCCTCCTGGGTTCAAGCGATTCTCTTGTCTCAGCCTCCCGAGCAGCTGGGATTACAGGCACATGCCTCCACGCATGGCTAATTTTTGTATTTTTAGTAGAGACAGGGTTTCACCATGTTGGTCAGGCTGGT
1	28745543	28745544	317	TAGGGCCGGGCGCGGTGGCTCACGCCTGTAATCCAGCACTTTGGGAGGCCGAGGCGGGCGGATCACGAGGTCAGGAGATCGAGACCATCCTGGCTAAAACGGTGAAACCCCGTCTCTACTAAAAATACAAAAAATTAGCCGGGCGAGGTGGCGGGCGCCTGTAGTCCAGCTACTCGGGAGGCTGAGGCAGGAGAATGGCGTGAACCCAGGGGCGGAGCCTGCAGTGAGCCGAGATTGCGCCACTGCACTCCAGCC
1	28898312	28898313	343	GGGCCGGGCGCGGTGGCTCACGCCTGTAATCCAGCACTTTGGGAGGCCGAGGCGGGCGGATCACGAGGTCAGGAGATCGAGACCATCCCGGCTAAAACGGTGAAACCCGCCGTCTCTACTAAAAATACAAAAAAATTAGCCGGGCGTAGTGGCGGGCGCCTGTAGTCCCAGCTGCTTGGGAGGCTGAGGCAGGAGAATGGCGTGAACCCGGGAGGCGGAGCTTGCAGTGAGCCGAGATCCCGCCCACTGCACTCC
1	2942608	2942609	252	GTGGTGATGATGATGGTGATGATGGTGATGGTGATGATGGTGATGGTGGTGATGATGGTGGTGATGAATGGTGGTGGTGGTGATGATGATGGTGATGATGGTGATGGTGATGATGATGGTGATGATGGTAATGACAATGATGGTGATGATGATAGTAATGACATGGTGGTGGTGATCATGATGATGGTGAGGATGGTGATGGTGATGATGGTGCTGGTGACGATAATGATGGTGGTGATGATGGTGATGGTGG
1	30196713	30196714	375	ACCATTACCACCACCACCACCACCACCAATACTGCTACCATGACTGTCACCACCAACACCATCACCACCATCAAGAGCACTGCCACTGTCACCACCACCACCATCACCATCATCACTACCACCACCAACACCATCACCACGACAACCATCACCATCATCACACCACCACCAACACCATCACCACCATCACCACCACCACCAACATCACCACCACCACCATCCACCACTACCAGCATCACCAAAATCACCATTACT
1	3021147	3021148	86	GCAGCAGCACCAGCTCCCGGGACCTCCGGTGGCCACAGCTCCGCCGTCTCACCTGGTGGGGGGCTTGCTTATCTCAGAACCCCCGTC
1	30346048	30346049	390	AGAAGGAAGAATAAAATAAAGAGCTGATATTGATGAATTTAAAAACATAAAAAAGTAGAGGAAATTAATGAAACAAAAAGCAAGTACTTTGAAAAAAATAAAACAAACCGCTAGAAAAACTGACAAAGATAAACAGAGAGGACACAAATAACCAATTTCAAGAATAAAACAGAGAGATTACATCACTTTGCAGTCACTAAAATTAGAGTAAGGTAATAGCAGGAACAATTTCACAGCCATAAACTGGACAATTTA
1	30569459	30569460	163	TGGCCCAGCCCCTAATGCCATGATAGGGCTGGGCTGGGCCTGCACGGTGCCATCTCAAAGCTCCCGGGTGATCCTGTGTGCAGCTGGTGAGGCCCTCGCTTTGGAGCAGCGTCCTCACCAGCTGCACACAGGATCACCCGGGAGCTTTGAGATGGCACCGTGCA
1	3092743	3092744	226	CCATCCATTTACCCATCTATCCCCTCATCTATCCACCAAGCCATTCATCCACCTATCTATGCATTCATCCACCATCTGTCCATCCATCCATCCATCCATCCATCCATCCATCCATCCATCCATCCACCCATTGATTCACCTACCCATCCATTCATCCATTCCTTCATTAACCCATCCATGCACTCATTCATCTATCCATCCATCCATCACCATCCATCCATCTCATC
1	30961687	30961688	204	ATCATCATCCTTATAATCACCATCACCATTACGACAAACTGCATCACCACCACAACCATCATCATCACCATTATCACCATCACTCCTTACAATTATGATCACCACCATAATCATTATTATTGCCATCACCATCATCACTATTGTTATCATCATCATCACTAACATTACATTACCATTACCACCATTACCATCACCATCATCATCA
1	3097906	3097907	62	ACACACGGTCTTACACACACGGTCTTACACACGCAGTCTTACGGTCTTACACACGGTCTTACA
1	31070673	31070674	63	TGGGGTGGGGGAGCTGCCAAGGGCCAACTCTAGAGAGAATGGAGGATCCAAAGGGAAGGAGTAA
1	31205218	31205219	1164	TGGAGAGGTGTGAGTGTGTGGGTATGTGGGGATGTGTGGGTGTGTGGGGGTGGGGTGTGTATGTGGGTGTGTGAGGGGGTGGGGGTGGGAATGTGTGGGTGTGGGGGAGAGTGAGTGTGTGGGTGTGTGTGGATGTGAGTGCATGTGGGTGTGGCTGTGTTGGATGTGTGTGGGGGGTGTGGGGTGTTGGTGTGTATGTGGGTGTGTGTGGGTATGTGGGGGTGGGAGGGTGGGAATGTGTGAGTGTGTGTGGAT
1	3131911	3131912	60	GGGGACAGGCAAGGCGCCACGGGTCCAGGAGAACAGGGCCTCCAGGAGGGTCATGGTCCCG
1	3177312	3177313	887	TCATCACTTGAATCACTGCCATCATGCCATCATCATCACCACCATCACCAACATCATCACAACCATCACCATCATCATCACCATCATCGCCGCCATCACCATCATCACCATCATCATCACTATCATCATCACCATCATCACCACTATCATTATCACCATCATCACCATCACCATCATCACCATCATCATCACCACCATCACCATCATCACCACCATCATCATCACCACCACCATCACCATCAACACCTTCACCAT
1	31904875	31904876	657	CAGAGGGTGCAGAGGGTGGAGAGGGTGGAGAGGGTGGAGAGGGTGGAGAGGGTGGAGAGGGTGGATAGGGTGGTTAGGGTGGATAGGGTGGATAGGGTGGATAGGGTGGTTAGGGTGGACAGGGTGGACAGGGTGGACAGGGTGGATAGGGTGGAGAGGGTGGAGAGGGTGGACAGGGTGGATAGGGTGGATAGGGTGCAGAGGGTGCAGAGGGTGGAGAGGGTGGAGAGGGTGGAGAGGGTGGATAGGGTGGTT
1	31981712	31981713	65	TTCCTTTCCTTTCCTTTCCTTTCTTTTCCTTTCCTTTCCTTTCCTTTCCCTTTCCTTTCCTTTCCT
1	33108387	33108388	1003	TTTTGAGACGGAGTCTCGCTCTGTCACCAGACTGGAGTACAATGGCACAATCTCGGCTTACTGCAACTTCCGCCTCCTGGGTTCAAGCAATTCCCCTGCCTCAGCCTCCTGAGTAGCTGGGATTACAGACGTGTGCCACCATGCCTGGCTAATTTTTTGTATTTTAGCAGAGACGGAGTTTCACCATGTTGGCCAGGATGCTCTCAATCTCCTTACCTCATGATCCGCCAGCCTTGGCCTCCCAAAGTGCTGGGA
1	33452382	33452383	1588	TCTGCCCGCCTCGACCTCCCAAAATGCTGGGATTACAGGTGTAAGCCACTGTGCCCAGCCCTAAGAGCTTTAAATGTAGTTTTGGGTATGTCATTTCCACCTGACTGCTGACTTTAAAACTGAACCCCATTAAGAGACACCTTCATTATGATTATAAATATGAAAGAGTATTGAATTTCTACATACACATCCTCCACAGACCCAAAGTCCCATGATAACTTGTTTGGCTCATCTCCCTGTAGCCACACCTAGCAC
1	3418556	3418557	217	GCTCCTGGCGAGTGTGCCCCCTGTGCCTCACATGGGCTCCTGGCGAGTGTGCCCCCCACACCTCCTCACATGGGCTCCTGGCGAGTGTGCCCCCCGTGCCTCACATGGGCTCCTGGCGAGTGTGCCCCCCGTGCCTCACATGGGCTCCTGGCGAGTGTGCCCCCCGCCTCCTCACATGGGCTCCTGGCGAGTGTGCCCCCCCGCGCCTCCTCACATGG
1	3504450	3504451	147	ACAGGAGTGGCTAGGAGGAGACAGGACCGGCCAGGAGTGGCCAGGAGTGGACAGGAGGAGACAGGAGGGGACAGGAGTGGATAGGAGGAGATAGGAGGGGACAGGAGTGGACAGAAGGAGACAGGAGGGGACAGGAGTGGACAGGAGA
1	35622652	35622653	1150	CAAAAAAAAAAAAAAAAAAAAAAAAAAAAAAAAAAAAAAAAAACCAGTAACTTTCTTTTTCTTGAGGCTTTGAAAACGACCTGGTCTGGTCTTTGTTAAATAATGAACCAAGCAAGTAGAGAAAAAAAAATTATTGGATAGGTTTATTGAGGGGTGAAATAAACTGTTATTTTCTTGTTCTGATCAAGAACATTTAAAAACGATTCCTATTTATTAACCCTTGAATACATATGCTATTCTTAGAATTTCTAGTCT
1	37215808	37215809	336	TTAGGCCGGGCGCGGTGGCTCACGCCTGTAATCCCAGCACTTTGGGAGGCCGAGGCGGGTGGATCATGAGGTCAGGAGATCGAGACCATCCTGGCTAACAAGGTGAAACCCCGTCTCTACTAAAAATACAAAAAATTAGCCGGGCGCGGTGGCGGGCGCCTGTAGTCCAGCTACTCGGGAGGCTGAGGCAGGAGAATGGCGTGAACCCGGGAAGCGGAGCTTGCAGTGAGCCGAGATTGCGCCACTGCAGTCCGC
1	37423056	37423057	64	CGGGGCACAGAGTCATGGGGCACACAGGCTCACAGGGCACAGAGTCACAGGGCACACAGGCTCAT
1	3785230	3785231	310	GGCCTGGTGTGGTGTGGCGTGGTGTGGTGTGGCGTGGTGTGGTGTGGCCTGGTGTGGTGTGGCCTGGTGTGGTGTGGTATGGTGTGGTGTGGCCTGGTGTGGTGTGGCTTGGTGTGGTGTGGCCTGGTGTGGTGTGGTATGGTGTGGTGTGGCCTGGTGTGGTGTGGTATGGTGTGGTGTGGCCTGGTGTGGTGTGGCTTGGTGTGGTGTGGCCTGGTGTGGTGTGGCCTGGTGTGGTGTGGTATGGTGTGGTGT
1	37911774	37911775	366	ACAGAGACAAGGGAGGGAGAGAGAGAGGGAGAGAGGAAGGGAGAGAGGGGGAGAGAGGAAGGGAGAGAGGAAGAGAGAGGGAGGAAGAGAGGAAGAGAGCAGGGAAGGAGAGAGGAAAGAGGGAGAGACAGAGGGACGGAGGAGAGAGGGAGGGAGAGAGGGAGGGACAGTGGGAGAGAGGGAGGAGGGAGAGAGTGAGAGAGAGGGAGGGAGAGAGGAAGAGAGATGGGGAGAGAGAAAGGGAAGAGGGAGAGA
1	38241396	38241397	2430	TTTTGTTTTTTTTTTGTTTTGTTTTTTTTTTTTTAAATTTAATTTTTTTATGATAATTCTGGGTGTTTCTCACAGAGGGGGATTTGCAGGGTCATGGGACAATAGTGGAGGGAAGGTCAGCAGATAAACAAGTGAACAAAGGTCTCTGGTTTTCCTAGCAGAGGACCCTGCGGCCTTCCGCAGTGTTTGTGTCCCTGATTACTTGAGATTAGGGATTGGTGATGACTCTTAACGAGCATGCTGCCTTCAAGCATC
1	38432766	38432767	320	AAAATAGAAAAATTAGACCGGGGCGCGGTGGCTCACGCCTGTAATCCTAGCACTTTGGGAGGCCGAGACGGGTGGATCACGAGGTCAGGAGATCGAGACCATTCTGGCTAACACGGTGAAACCTCGTCTCTACTAAAAATACAAAAAAAATAGCTGGGCGTGGTGGCGGGCGCCTGCAGTCCCAGCTACTCGGGAATGAGGCAGGAGAATGGCGTGAACCCGGGAGGTGGAGCGTGCAGTGAGCCAAGATCGCGC
1	38950742	38950743	75	GAGTTTGAGGCTGCAGTGAGCTATGATTGCACCACTGTACTCCAGCCTGTATGACAGAGCAAGACCCCATCACTAA
1	39411521	39411522	1969	GATTACAGGCATGCACCACCATGCCTGGCTAATTTTTTTGTATTTTTTGTAGAGACAGGGTTTCACCATGTTGGTCAGGCTGGTCTCGAACTCCTGACCTTGGGTGATCTTCCTGCTTCGGCCTCCCAAAGTGCTGGGATTACAGGCGTGAGCCACCGCACCTGGCTTTTAAATGAAAATTTATTCACTTACAAATATTTAAGGGCATATCAGCCTCCTCCAGATACGTTTTGCAAACACCTTTTTGAACACAAA
1	39510252	39510253	214	AGGAAAAGGAGGGGGAGGAGAAGGGAGGGGAGGAAAGAGGAGAGAAGAAAGAAGAAGGAGAAGGAAGAAAGGAGGGAGGAGGAGGAGGAGAAGGGGAGGGGGAGGAAGGAGGAGGAGAAAGAATGAGGAGAAGGAGAAAGAAGAAGGAAGAAGAAAGAAGAAGAAGAGAGGAGGAGGAGGAGGGGGAGAAGGGGAGGGGAGGAGGAGGAGGAGAA
1	39747169	39747170	310	TTTTTTTTTTTTTGAGACGGAGTCTCGCTCTGTCGCCCAGGCCGGACTGCGGACTGCAGTGGCGCAATCTCGGCTCACTGCAAGCTCCGCTTCCCGGGTTCACGCCATTCTCCTGCCTCAGCCTCCCGAGTAGCTGGGACTACAGGCGCCCGCCACCGCGCCGGCTAATTTTTTGTATTTTTAGTAGAGACGGGGTTTCACCTTGTTAGCCAGGATGGTCTCGATCTCCTGACCTCATGATCACCCGCCTCGGCC
1	40354446	40354447	319	TTTTTTTTTTTTTTTTTTTTTTTTTTTTGAGACGGAGTCTCGCTCTGTCGCCCAGGCTGGAGTGCAGTGGGCGGGATCTCGGCTCACTGCAAGCTCCGCTCCCGGTTCACGCCATTCTCCTGCCTCAGCCTCCCAAGTAGCTGGGACTACAGGCGCCCGCCACTACCGCGGCTAATTTTTTGTATTTTTAGTAGAGACGGGGTTTCACCATTTTAGCCGGGATGGTCTCGATCTCCTGACCGTCGTGATCCGCCC
1	40516078	40516079	113	TGAAATATCTTCTGTAGTCTGGGCACGGTGGCTCATGCCTGTAATCCCAGCACTTGGCTCACCGCAATTACAGGCATGAGCCACCGTGCCCAGACTACAGAAGATATTTCAAAG
1	41835544	41835545	54	AGGGCTGCCCTGGGCTCCTGCAGTCCCTTGGCAAGGGGACAGAGAGCCCAGGGCA
1	41890924	41890925	483	GTGGTGTGTGTGTGTGCGCCTGTGTGTGGTGTGTGTGTGTTGTGTGCATGTGTGTGGTGTGGTGTCAACACTGGACAGTATGGTACAGGCACCTCCTGAAGTCTAATGCGGAAGGCCCTTAGCAACCTTATGTCCCAGATGAAGAAAGGGTTTGGGGAGGTGGTGTGACTTATCCAAGGTCACACAGTCACCCAAGAAACGGCCCCAGGATTCAGACCCAATCTGCTGACTCCCAAACCTGCGTTTGATTTATTG
1	4196798	4196799	340	TATCATGGGAGTGGGTTAGTTATCATGGAGTGGGTTAGTCATCATGGGAGTGGGTTAGTTATCATGAGAGTGGGTTAGTGATCATGGAAGTGGGTTAGTGATCATGGGAGTGAGTTAGTGATCATGGGAGTGGGTTGGTTGTCATGGGAGTGGGTTAGATATCATGAGAGTGGGTTAGTTATCATGGGAGTGGGTTAGTCATCATGGAGTGGGTTAGTGATCATGGGAGTGGGTTAGTGATCATGAGAGTGGGTT
1	41992964	41992965	457	CCTCACACTCCCTCACACGTTCACCCTCACACACTCACCCTTACATGCTCACCCTCACACTCACACCCTCACATGCTCACCCTCACACACCCTCACACATACACCCCCACACATTCGCCCTCACACCTGCTCACAGGCCCACACTCACCCTCACACACACCCTCACATGCTCACCCTCACATGTTAACCTCACACATACACCCCCACACTCACACACCCTCACACCTGCTCACACCCCCACTCACCCACACACAC
1	4204692	4204693	1142	CCATTCTTACTATCATCACTGTGATCACCATCATCATTACCACCATCACCATCACCATCATCATTACATCATCATCATCATCACCACCACCACTACCACACCACCACCATCACACCATTATCATTATCATCACCACCATCCTTACTATCGTCACTGTGATCACCATCATCATTACCACCATCACCATCACCAACATCATTACATCATCATCATCACACCATCACCACCACCACCACCACACCATTATCATCACCA
1	42789778	42789779	93	ATACACCAGTTATATATAGTGTATATATACACTATATATACACTGTGTATATACAGTATATATACTGTATATATACACTGTGTTATACTATATA
1	4396589	4396590	631	AAACATGATAACGACAATGATAGTGGAAAGCGAATGGTGGTATTGATGGTGATGATGAAGAGGATGGTGATAATAATGATGATGGTGATGATTATGTTGGTGATGATGGTAATGGTGATGATAATGATGGTGATGGTGATGATGATGATTATGTGATGATGGTGGTGATGGTGATGATGGTGATGGTGATGGTGATGGTGGTGATGGTGGTGATGATGATGGTGATGGTGATGGTGATAATGGTGATGGTGGTGA
1	46169014	46169015	2821	GGCCTCCCAAAGTGCTGGGATTACAGGTTTAAGTCACTGCACTCAGCCAACAATCTTTATTTACAGATGATAGGATCTTGTATATAGAAAATCCTAAGGACTCTACCAAAAAAAAAACTATTAGACTATGAGTGCAGCAAGGTCGCAGAATAAATTGTATTTCTACACACGAGCAATGAACAATCTGAACATGAAATTAATAAAACAATTTATAACAGCATTAAAAGGAATAAAATACTTCTGAATAAATTTTAA
1	46679034	46679035	340	ACTTGGCCAGGCGCGGTGGCTCACGCCTGTAATCCCAGCACTTTGGGAGGCCGAGGCGGGCGGATCATGAGGTCAGGAGATCGAGACCATCCTGGCTAACAAGGTGAAACCCCGTCTCTACTAAAAATACAAAAAATTAGCCGGGCGCGGTGGCGGGCGCCTGTAGTCCCAGCTACTCGGAGGCTGAGGCAGGAGAATGGCGTGAACCCGGGGAAGCGGAGCTTGCAGTGAGCCGAGATTGCGCCACTGCAGTCC
1	47650133	47650134	107	TCCATCCCCACTAAACCCATCTCCCAACAAGCTCCATCCCCCACCAAGCTCCATCCCCCACTAAACCCATTCCCACTGAGTCCATCACCCACTGAGTCCATCCTCCAC
1	48058281	48058282	68	AGCAGCAGCCCTGGCTGTCAGCTGGGGCAGGGACTCAAATCCCAATTTGGGTCTTTCAGTGGAAACAGA
1	48208900	48208901	327	CACTTCTACCACCACCACCACCACCACCATCACCTCCGTCACCATTATCACCACCACCACCATCACTACCACCACCACCACTTCCACCACCACAACCACCACCATCATCTCCATCACCATCACCATTACAACTCCTGCCATTGCCACCACCACCACCACCATCACCATCACTATTATCACTGCCACCACCATCACCATCACCACCACCATCACCACTTCCACCACCACCACCTCCATCACCATCACCATCACTAC
1	4999544	4999545	1855	ATGGAGGACATTGACATCATACGGAGGACACTGAAATCATATGGATGATGTTGACATCATATGGAGGATATTGACATCATACGGAGGACACTGACATCATACAGAGGATATTGACATCATATGGAGGATATTGACATCATATGGAGGATATTGACATTATATGGAGGACACTGACATCATACAGAGGACACTGACATCATACGGAGGACACCGACATCATATGGAGGACACCGACATCATATGGAGGACATTGAC
1	50834996	50834997	546	CACCATCATCACTATCATCATTATCACCACCATCATCATTATCACTACCATCATGATCATTACCACCACCATTATCACCACTATCATCACCATCACCATTATCACCATCATCATCACCAACATCTTCATCATCACCATCATCATCATCGCCACCACCATCTTCATCATCACCACCATCATCATCACCACCACCATCACCATTATCATCATCACCATCATCAGCACCATCATCATCACCATTATCATTATACCACC
1	5172470	5172471	124	GGAGAGGCAGAGGGAGAAGAAGAGGGAGAGGAATGGGGAGAGGCAGAGGAAGAGGAGAGGCAGAGGGAGAGGAAGAGGGAGAGGCAGAGGGAGAGGAAGAGGGGGATGCAGAGGGAGAGGAAGAG
1	5220361	5220362	616	AGTGTGTATGTGTATGTGTTAGTGTGTGTGTATGTGTATGTGTTAGTATATATGTATGTGTATGTGTTAGTATGTGTGCATGTGTATGTGTTAGTGTGTATGTGTGTTAGTGTGTGTATGTGTGTGTTAGTGTGTGTATGTGTTAGTATGTGTGTATGTGTATGTGTTAGTGTGTGTATGTGTTAGTGTGTGTATGTGTTAGTATGTGTGTATGTGTTAGTGTGTGTGTTAGTATATATGTATGTGTATGTGTTA
1	52318223	52318224	557	TTTTAAAACTATATAGTTTATAGTTTTAAACTATATAGTTTATATATAGTTTTAAACTATATAGTTTATAGTTTTAAACTATATAGTTTATATATAGTTTTAAACTAGTTTATATAGTTTAAAACTATATAGTTTATATAGTTTAAAACTATATAGTTTATATAGTTTAAAACTATATAGTTTATATAGTTTAAAACTATAGTTTATATAGTTTAAAACTATATAGTTTATATAGTTTTAAAACTATATAGTTTA
1	53564909	53564910	61	CCTCGGTACACTCACACTGCCTCAGTATAATCACTCCACCTTGGTACACTCACACACCCCTC
1	53991151	53991152	431	GGGAGGTTGGGGGTGCTGGGAGTCTGGGGAGGCTGGGGAGGTGGGGGCTGGGGAGGCTGGGGAGGTGGAGCTGGGGAGGTGGGGAGGCTGGGGCTGGGGGGCTGGGGAGGCTGGGGAGGTGGGGGCTGGGAGGCTGGGGAGGTGGGGGCTGGAAGGCTGGGGAGTGGGGGGCTAAGAAGGCTGGGGGGCTGGGGTGCTGGGGAGGCTGGGGAGGTGGGGGCTGGGAGGCTGGGGCTGGGCGCTGGGGAGGCTGGG
1	5447230	5447231	5288	TATGTGGTGTGTGTGTGGTGTGTGTAGTGTGTGGTGTGTGTATGTGTGGTGTGTGTGTAGTGTGGTGTGCGTGTGTGGTGTGTTCTATGTGTGGTGTGGTGTGTGTGTGTATGTGGTGTTTGTGTGTGGTGTGTGTAGTGTGGTGTGTGGTGTGTTCATCTGTGTGTGTATGTGGTGTGTGTGTGGGTGTGTGTGGTGTGGTGTGGTGTGTGTGGTATGTGTGTGTATGTGTGTGGTGTGTGTGTATGTGGTGTG
1	54976297	54976298	454	TTTGGTTTGGTTTGGTTTGGTTTGGTTTGGTTTGGTTTGGTTTGGTTTGGTTTGGTTGTTTGGTTTGGTTTGGTTTGGTTTGGTTTGGTTTGGTTTGGTTTGGTTTGGTTTGGTTTGGTTTGGTTTGGTTTGGTTTGGTTTGGTTTGGTTTGGTTTGGTTTGGTTTGGTTTGGTTTGGTTTGGTTTGGTTTGGTTTGGTTTGGTTTGGTTTGGTTTGGTTTGGTTTGGTTTGGTTTGGTTTGGTTTGGTTTGGTT
1	55274664	55274665	110	CCTACTCATCCCACAGCTCTCAGCTTCCAGAAGCCTTCCTCAGCCCCGCTAGGTGGCGTCTCCCTTCCCAGGAGTCTCCACTGTGGTTGTGTGTTTAGCATCCCTCCCCCA
1	55468717	55468718	680	CATAATAATAATCGTCATCATCCTCATCCTCATTACCATCAATCATCACCATAACTATTATCACCACCAAAATTATCAACATCACCATCATTATCACCACTATCATCATCACTATCACCATCGTGACCATTACCATCATCATCACCATTATCATTATCACCATCACCATCATCATAACCGTTACCATCATTATCATCACATCACCATCATTGACATCTTCATTACCATCAACATCGTCATTACCATCACCATTCT
1	56132697	56132698	59	TATACATCTATACATGTATAGTATACATCTATACATCTATACATGTATAGTATACATCTA
1	58071858	58071859	213	ATAACACGGTTGAAACCCCGTCTCTACTAAAAATACAAAAATTAGCCGGGCGTAGTGGCGGGCGCCTGTAGTCCCCAGCTACTCGGAGGCTGAGGCAGGAGAATGGCGTAAACCCGGGAGGCGGAGCTTGCAGTGAGCCGAGATTCGCGCCACTGCACTCCAGCCTGGGCTACAGAGCGAGACTCCGTCTCAAAAAAAAAAAAAAAATACCGGA
1	5862921	5862922	450	TGATGGTAATGACATTGATGATGATGATGGTGATGATGATGATGATGATGATGGTGATGGTGATGATGATGATGATGATGGTGATGATGGTGATAGTGATGATATGATGATGGTGATGATAATGGTGATGATGGTGATGTGTTAATGATGATGGTGGCGATGATGACAATAGTCATGATGATGATGATGGTGATGGTGATGATGATAGTGATAGTGATGATGTGATGATGGTAATGATGATGACGATGATGGTGA
1	5877366	5877367	551	TATGTGGACAGAGGGGATTACTGGTGTGTGGATACAGGGGATTACTGGTGTGTGGACAGAGGGATTACTGGTGTGTGGATATGGGGGATTACTGGTGTGTGGATACGAGGGATTACTGGTGTGTGGATACGGGGGATTACTGGTGTGTGGATACGGGAGATTCCTGGTGTGTGGATACAGGGGATTACTGGTGTGTGGATACAGGGGATTACTGGTGTGTGGACAGAGGGATTACTGGTATGTGGACAGAGGGGA
1	5889892	5889893	358	CATCACCACTATCACTATCACCATCACCACCACCATCACCACCATCATCACCATCATCACCACCATCACCATCACCACCATCACCATCGCCACCATCACCACCACCATCACTACCAGCATCATCACTGTCAACACCACCATCATCACCATCACTAACATAAGCATCACCACCATCACCACCACCACCATCACTATCACCATCACCAGCACCATCACCATCACCACCAACACCATCATCACCACTATCACCATCAC
1	61288123	61288124	240	ACCTTCTTTTCCTAAGAAAACTAGGTATTAATAAATCATATCAATATGTATTGAATATTTATTTTGAAACACACACTTAAGTGCTGTATAAGTTTGATTAGACACATCAAACTATGCACCTGATATTTTCAGGGAATTAGAGTAGCCCAAACTTAAAATATTCCCAAATGAACTCATGGTCCCCACTTTTGCTAGTATTGCTTAGCTCAGCAAATGGTACTATCTTCACCTGACTGCTTCA
1	61344059	61344060	53	TTGTGCATGTGTTTGTAAGGGGAACATTACAACACATGCACATTACAAAACATT
1	64850180	64850181	2143	CTTTTTTTTTTTTTTTTTTTTTTAATTTATTTTTTTATTGATAATTCTTGGGTGTTTTCTCACAGAGGGGGATTTGGCAGGGTCATGGGACAATAGTGGAGGGAAGGTCAGCAGATAAACAAGTGAACAAAGGTCTCTGGTTTTCCTAGGCAGAGGACCCTGCGGCCTTCCGCAGTGTTTGTGTCCCTGATTACTTGAGATTAGGGATTGGTGATGACTCTTAACGAGCATGCTGCCTTCAAGCATCTGTTTAAC
1	64958062	64958063	354	TCCCCTATTGTTTTCTTTTTTTTTTTTTTTTTTTTTTTTTTTTTTTTTTTTTTTTTTTTGAGACGGAGTCTCGCTCTGTCGCCCAGGCCGGACTGCGGACTGCAGTGGCGCAATCTCGGCTCACTGCAAGCTCCGCTTCCCGGGTTCACGCCATTCTCCTGCCTCAGCCTCCCGAGTAGCTGGGACTACAGGCGCCCGCCACCGCGCGCCCGGCTAATTTTTTGTATTTTTTTTTTTAGTAGAGACGGGGTTTCA
1	65346950	65346951	349	TTTTTTTTTTTTTTTTTTTTTTTTTTTTTTTTTTTTTTTTTTTTTTTTGAGACGGAGTCTCGCTCTGTCGCCCAGGCCGGACTGCGGACTGCAGTGGCGCGATCTCAGCTCACTGCAAGCTCCGCCTCCCGGGTTCACGCCATTCTCCTGCCTCAGCCTCCCGAGTAGCTGGGACTACAGGCGCCCGCCACCGCGCCCGGCTAATTTTTTGTATTTTTAGTAGAGACGGGGTTTCACCTTGTTAGCCAGGATGGT
1	66055942	66055943	319	AAATATGAATAATTTTTTTTTTTTTTTTTTTTTTTTTTTGAGACGGAGTTTCGCTCTGTCGCCCAGGCTGGAGTGCAGTGGCGCGATCTCGACTCACTGCAAGCTCCGCCTCCCGGGTTCACGCCATTCTCCTGCCTCAGCCTCCCGTGTAGCTGGGACTACAGAGCGCGCGCCACCATGCCCGGCTAATTTTTGTATTTTTAGTAGAGACAGGGTTTCACCGTGTTAGCCAGGATGGTCTCGATCTCCTGACCT
1	69055431	69055432	147	CTAAGTGATTACTACCTTCATTAGAGATCATGTAGGCAATGTACCCTTGCTGGAGAATATACCTTCATTGTTCATAAATGTATTATAAATATTATCCTCCATAATAACAGAAGAAGCCCTAAAAAGCAGACAGTTTTACATAAACTGC
1	694463	694464	74	CCTGCGGTTCATGGCCTTTCTTCCATTTGTGTTCTTGCGAAGTGAATTTAAATGACATCTATCAAGATGGATAAA
1	6997619	6997620	198	ATGGTGATGGTGATGATGGTAGTGGTGATGATGATGGTGATGGTGATGATGGTGGTAAGTGGTGAATGGTGATGGTGATGGTGATGATGGTGGTGGTAAGTGGTGAATGGTGATGGTGATGGTGATGATGGTAGTGGTGATGATGATGGTGATGGTGATGATGGTGGTGGTAAGTGGTGAATGGTGATGGTGATCGTGA
1	7000977	7000978	1059	TCCCCCTCCCTGTGAGGATCCCCTCCCTGTGAGGATCCCCCACCCTGTGAGGATCCCCCTCCCCCAAGGATCCCCCTCCCTCTGAGGATCCCCCTCCCCGTGAGGATCCCTCTCCCCATGAGGATCCCCTCCCCGTGAGGATCCCCCTCCCCTTGGAGGATCCCCACTCCCCGTGAGGATCCCCCTCCCTGTGAGGACCCGCCTCCCTGTGAGGATCCCCCTTCCCCGTGAGGATCCCCCCTCCCCCTGAGGAGG
1	70091060	70091061	326	ACTGGGCCGGGCGCGGTGGCTCACGCCTGTAATCCCAGCACTTTGGGAGGCCGAGGCGGGCGGATCACGAGGTCAGGAGATCGAGACCATCCCGGCTAAAACGGTGAAACCCCGTCTCTACTAAAATACAAAAAATTAGCCGGGCGTAGTGGCGGGCGCCTGTAGTTCCAGCTACTTGGGAGGCTGAAGCCAGGAGAATGGCGTGAACCCGGGAGGCGGAGCTTGCAGTGAGCCGAGATCCCGCCACTGCACTCC
1	7044152	7044153	202	GAGTGGATAGGTGGATAGAGGGTTGGGTGGGTGGATGATGAGTAGGTGGATGGGTGGATAGGTGGATGGATGAATGGATGATGGGTGGATGGATGGGTGGATAGATGGATGGGTGGGTAGATGGATGGGTAGGTGGATGTGTGGATAGATGGATGGATGAATGGATGGTTGGGTGGATGGATGGTTGGATGAGTGAACCGATG
1	72393816	72393817	173	CATATGTATATATACACACATATGTATATATACACATATGTATATATGTATATATATCACACACATATGTATATATACACATATGTATATATGTATATATACACACATATGTATATATACACATATGTATATATGTATATATACACACATATGTATATATACACATATGTATAT
1	72393954	72393955	64	TACACACATATGTATATACGTATATATGTATATATACACACACATATGTATATACGTATATATGT
1	724864	724865	2370	TTCTATTCCATTCCATTCCACTAGAGTCCATTCCAATCCATGCGAGTCCATTCAATTGCATATCATTTCGAGTCCATTCCATTCCATTCCAGTACATTCCATTCCATTCCATTCCAGTACATTCCATTTCATTTCAGTCTATTCCATTCCATTCGAGTCCATTTCATTCCATTCCATTGCATTCTTTCAGGTCCATTCAATTCAACTGCATTCTATTCGAGTCCGTTCGATTCCATTCCATTGGAGTCCATTCCA
1	72639006	72639007	316	TGGCCGGGCGCGGTGGCTCACGCCTGTAATCCCCAGCACTTTGGGAGGCCGAGGCGGGCGATCACGAGGTCAGGAGATCGAGACCATCCCGGCTAAAACGGTGAAACCCGTCTCTACTAAAAATACAAAAAATTAGCCGGGCGTAGTGGCGGGCGCCTGTAGTCCCAGCTACTTGGGAGGCTGAGGCAGGAGAATGGCGTGAACCGGGAGGAGGGAGCTTGCAGTGAGCCCGAGATCGCGCCACTGCACTCCAGC
1	72981492	72981493	152	GTATATATGTATACATATATATGTACATATATATGTATACATATATATGTGTATATATGTATACATATATATGTACATATATATGTATACATATATGCACATATATATGTATACATATATATGTACATATATATGTATACATATATACACGTA
1	73648825	73648826	76	AACTTCAGGAAACATGAATTTGTTTTCAAAAGGAAGTTTCAGAATAATCATTTAGTTTTGTTTTTAGAATAAACTTT
1	77833596	77833597	114	TTTATATTATATATCACATATATTATATATATTATATATAACATATGTTATATATATTATATATAACATATGTTATATATAATATATATAACATATGTTATATATAACATATATA
1	77938474	77938475	573	CTGAGGTGAGAGAATCACTTGACTCTGGGTAGCAGAGGTTGCAGTGAACTGAGATGATGCCACTGCACTCCAGCCTGGGTGACACAGTTGAGACCCTGTCTCAAAAAAAAAAAGGGAGGAAGACGGAGGAAGACTAGGCATCTAGAAGTGTCTGCCAAAGAGGTCACTGAGGGAGGAAGAAGAATGGCCCTTGGCAGGGCTCTGGAGCCACCCATTCCACCTTCACCAATAGTAGCCCCCATTCATATCAGTCTA
1	78942232	78942233	77	TGAAGACCTAGTAAGAGTATGGGTTTTGTGGTCAGATGGACGTGGTTTTGTCATATGTGCTAGTCATTCCAACCAGCT
1	79582078	79582079	307	AATCGGCCGGGCGCGGTGGCTCACGCCTGTAATCCCAGCACTTTGGGAGGCCGAGGCGGGTGGATCATGAGGTCAGGAGATCGAGACCATCCTGGCTAACAAGGTGAAACCCCGTCTCTACTAAAAATACAAAAAATTAGCCGGGCGCGGTGGCGGGCGCCTGTAGTCCCAGCTACTGGGGAGGCTGAGGCAGGAGAATGGCGTGAACCCGGGAAGCGGAGCTTGCAGTGAGCCGAGATTGCGCCACTGCAGTCC
1	79650224	79650225	131	TTTTGACAGTATTACTCTACTCTTTTTTTCATTCCTCAGCTCTGTAACAAATGTAACCTTCTGACTCCACTGATCCAAGTTTTCTGCAGCAAAAGTAGATGCAGTTTAATTCTTCTTTTTGTTTTGTTTTGT
1	80545258	80545259	203	GAAATGATGAGTAAATATAAGTGATTGTTACTCAGAAAGATTCTGCACCGGCCTGTGATTTCTTTTGCTGTTCCAACTCCCTTAGACAATTTTCAAATATTTATATAATTGAAAAATTGTGTCATTTTGAGCATGGTCAGCCACATTCTTTTGTAATATATTTTGTAATATAAACTAACTGGAATGTAAGCATTATATAATTTA
1	81660357	81660358	199	GATTTTAAATTATTAAAAAATCTCCACGATTTTTCCCTTTCCATTTGCTAATCTTTGGAAGCAAGTCACTAAATTCAGTACATACTCAAGGAATGAGGAAGCAAGCTCCCCCCTCCTGGAGGAAGGAGTATCAAATATCTTGTAATAATTAATAAATATTTGAAGGTAGACATTTTGAGGCTATGCCGATATCCTGTTTT
1	83132038	83132039	81	GCCTCCCAAGGAGCTGGGACTACAGGCACATGCCACCAAACTCAGCTAGTTTTTGCATTTTTTGTAGAGATAGGGACTCACT
1	8336972	8336973	734	CACACCACACACATACACACACCACACACACACACACAAACACACATCACACACATACAAACACACACATACACCACACACATACACACACCACACACATACACACACCACACACACACACACCACACACATACACCACACACAAAACACACACATACACCACACACACACATACACACACACCACACACATACACATACCACACACACACATACACACACACACACACACACACACACCACACACATACACACA
1	83843949	83843950	300	TAGCTATATATATTATTATACTATATATAAATATTGTTTTTTTTTATTTTTTTGAGAGAGTCTCAGCTCTTCGCCACGATGAGTCGGATTCTGTCACTGCAAGTCCGCTCCGGTCAGCCATCTTTGCGCTAGCCTCATACCTAAATGAATAGGCGCACGCCACTAACCGCTAATTTTTGTATTTAGTAGAGAGGGTTCACGTATTAGCGATGTCTCGATCTCCTGACATTGATCGCCGCTCGGCTCAAAGTGCTG
1	8404953	8404954	314	GGGTGGATGGCTGGATATGTGGATGGATGGATGGATGGGTGGATGGATGGATATATGAAGAAGTGGATATTTAGATGGGTGGATGGATGGATAGATGGATGGATGGATGGATGGGTGGACGGATGGATGGATATATGGAGAAGTGGATATTTAGATGGGTGGATGGATGGATAGATGGATGGATGTATCTAAGGAGAAGTGGATATTTGGATGGGTGGATGGGTGGATATGTGGATGGATGGATGGATAGATGGA
1	84913270	84913271	323	GTTTTTCTTTTCTTTCTTTTTTTTTTTTTTTTTTTGAGACGGAGTCTCGCTCTGTCGCCCGGCCGGACTGCGGACTGCAGTGGCGCAATCTCGGCTCACTGCAAGCTCCGCTCCCGGGTTCACGCCATTCTCCGCCTCACCTCCGAGTAGCCTGGGACTACAGGCGCCCGCCACCGCGCCCGGCTAATTTTTTGTATTTTTTAGTAGAGACGGGTTTCACCTTGTTAGCCAGGATGGTCTCGATCTCCTGACCTC
1	85620128	85620129	514	AAGACTTCATCTATATCTTTTGATTTATTATTATTTTTTTTTTTTTTGAGACAGAGCCTTGCTCTGTCGCCCAGGCTGGAGTGCAGTGGCGCGATCCCGGCTCCTGCAAGCTCCGCCTCCCGGGTTCACGCCATTCGCCTGCCTCAGCCTCCCGAGTAGCTGGGACTACAGGCGCCTGCCACCATGCCAGGCTCATTTTTTGTGGTTTTTTTTTTGTTTCTTTGTTTGTTTGGTTTTTTGTTTTTTAGTAGAGAC
1	88860719	88860720	95	TTCATGTTTATTCCTTGCATATTGTCTGTCAGAACATTCAGTTCTGCTTAATTATAAACTATTTCTTTTTCCATTTATAAATATGTTTTTTTCCCC
1	88923365	88923366	192	GTGTGGTGTGTGGTGTGTGCATGGGGCGTGTGGTATGTGTGGTGCCTGTGTGGGTGTGTGTGTGGTGTGTGCATGGTGTGTGCATGGTGTGTGTGGTGTGTGGTGTTTTTGGGGGTGTGGTGTGTAGAGTGTGTATGGGTGTGTGGTGTGTGTGTGAGTGTGGCGTGTGGTAGTGCATAGTGTGTGTACTGTG
1	90370570	90370571	271	TTTTTTTTTTTTTTTTTTTTTTTTTTTTTGAGACGGAGTCTCGCTCTGTCGCCCAGGCTGGAGTGCAGTGGCGGGATCTCGGCTCACTGCAAGCTCCGCCTCCCGGGTTCACGGCCATTCTCCTGCTCAGCCTCCCAAGTAGCTAGACAATACAGGCGCCCGCCACTACGCCCGGCTATTTTTTGTAGTTTTAGTAGAGACGGGGTTTCACCGTTTTAGCCGGGATGGTCTCGATCTCCTGACCTCGTGATCCGC
1	90844350	90844351	91	GTGTATATATACACATACACTTATATGATGTATTGTATATATACACATACACTTATATGATGTATTGTATATATACACATACACTTATATGA
1	90844498	90844499	68	ATGATGTATTGTGTATATATACACATACACTTATATGATGTATGTGTATATATACACATACTTATATGA
1	90844681	90844682	232	CACTTATGTGTGTGTATATATACATATACTTATATACTTATATGTATATGTACATATATACTTATATGTACATACATATATACTTATATAAGTATATATGTGTATGTACATACACATACTTATATGCATGTATATATACATATATACTTATACGCATGTATATATACATATATACTTATACGCATGTATATATACATATATACTTATACGCATGTATATATACATATATACTT
1	91634121	91634122	58	CATATGTGTACACGTGTAGACATGTAGACATATGTGTACACGTGTAGACATGTAGACAT
1	9230459	9230460	319	GCCACCACACCTGGCTAATTTTTTCTATTTTTAGTAGAGACAGGGTTTCACTATATTGGCCAAGCTGGTCTGGAATGCCTGACCTCATGATCCACCCTCCTTGGCCTCCCAAAGTGCTGGGATTACAGGTGTGAGCCACCGCACCCAGCCCAGTTACAGTTTTTTTTTTTTTCTTTTTTTTTTTTTTTGAGATGGAGTCTTGCTCTGTCACCCAGGCTGGGGTGCAGTGGCGTGATCTCGGCTCACTGCAACCTC
1	93498213	93498214	339	AGATTCCTTTTTCTTTTTCTTTTTTTTTTTTTTTTTTTTTTTTTTTTTTTTTTTGAGACGGAGTCTCGCTCTGTCGCCCAGGCTGGAGTGCAGTGGCGGATCTCGGCTCACTGCAAGCTCCGCCTCCCGGGTTCACGCCATTCTCCTGCCTCAGCCTCCCAAGTAGCTGGGACTACAGGCGCCCGCCACTACGCCCGGCTAATTTTTTTGTAATATTTTTAGTAGAGACGGGGTTTCACCGTTTTAAGCTGGGAT
1	94341681	94341682	2505	TTCCCTTGTCTTTTTGGATACCTATTTTAGTCATATTTTTCCCACCAATCATAGCTAAAGGTGCTCCTTTTGGTGACATATTAGAAATCAATCTGTTGGATGCAGTGACTCATGCCTGTAATCCCAGCACTTTGTGAGGCTGAGGCAGGAGGATCACTTGAGCCCAAGTAGGTGTTTGAGATCAGCCTGGGCAATATAAGGAGACCCTATCTCTACACAAAAAATTTTTTTTAAATTAGCCGTGCCCTGTGCGCC
1	9471354	9471355	2640	TGTTGTGGTAGTATGGTGTGGTGTTGTGGTGGTGTGGTGGTGTGGTAGTGTGTTGTTGTGGTGGTGTGGTAGTGTGGTGTTGTGGTAGTGTGGTGTGGTGTTGTAGTGTGGTGTTTGTGGTGTTGTGGTAGTGTGGTGTTGTGGTAGTGTGGTGTTGTGTTGTGGTAGTGTGGTGGTGTGGTGTTGTGGTAGTGTGGTGTGGTGGTGTGGTGTTGTGGTAGTATGGTGTGGTGTGGTGTTGTGGTGTTGTGGTAG
1	95423043	95423044	511	TATTCCGCCCTTTCTAACTCCGCTGCCGCCATGGCTCCTGTGAAAAAGCCTGTGGTGAAGGGGGGCAAAAAAAAGAAGCAAGTTCTGAAGTTCACTCTTGATTGCACCCACCCTGTAGAAGATGGAATCATGGATGCTGCCAATTTTGAGCAGTTTTTGCAAGAAAGGATCAAAGTGAACGGAAAAGCTGGGAACCTTGGTGGAGGGGTGGTGACCATCGAAAGGAGCAAGAGCAAGATCACCGTGACATCCGAG
1	9684047	9684048	6497	CTGAGGTCAGGAATTCGAGACCAGCCAGGCCAACATGGCGAAACCCCATCTATACTAAAAACACAAAACTTTAGCCGGGCTTGGTGGTGGCGTGCGCCTGTAATCCCTGCTACTTGGGAGGCTGAGACACAAGAATCGCTTGAACCCGAGATGGGTGGTTGCAGTGAGCCAAGATCGCGCCACTGCACTACAGCCTGGGCAACAGAGCAAGACTCTGTCTCAAAGATAAATACATACATACATACCTCTGACCTG
1	98605285	98605286	338	AAAATATTTCTTTTTTTTTTTTTTTTTTTTTTTTTTTTTTTTTTTTTGAGACGGAGTCTCGCTCTGTTGCCCAGGCCGGACTGCGGACTGCAGTGGCGCAATCTCGGCTCACTGCAAGCTCCGCTTCCCGGGTTCACGCCATTCTCCTGCCTCAGCCTCCGAGTAGCTGGGACTACAGGCGCGCCCGCCACCGCGCCCGGCTAATTTTTTGTATTTTTAGTAGAGACGGGGTTTCACCTTGTTAGCCAGGATGGT
10	100495010	100495011	1520	AGCCACAGCCTGAGCTGTACCTTTGCCCCTTTTAGCCATGGCTAGAGTGGCACCAAGCCCCTAGGCTGCACAGAGAAGGGAGGCCCTGGGCCCAGCCCACAAAACCATTTTTTCCTCCTAGGCCTCCTGGCCAGTGATGGGAGGAACTGCTGTTTAGGTCTCTGACATGCCCTGGAGACATTCTTCCCTTTGTCTTGGCAATTAACATTTGGCTCCTTGTTACTTATGCAAATTTCTACAGCAGGCTTGAATTTC
10	101011353	101011354	96	AGTATTTTGTTGAGGATTTTTGCATCTATGTTCATTAGGGATATTGTCCTGTAGTCTTTTTCGGTTGTGTCTTTGCCAAGTTTTGGTATCAGGTGAT
10	101016135	101016136	230	GCCCCTACACACCTGTGGGTGTTTCTCGTAAGGTGGGACGAGAGATTTGGAAAAGAAAAAGACACAGAGACAAAGTATAGAGAAAGAAATAAGGGGATCCTCCATATGCTGAACGCTGGTTCCCCGGGTCCCCTTATTTCTTTCTCTATACTTTGTCTCTGTGTCTTTTTCTTTTCCAAATCTCTCGTCCCACCTTACGAGAAACACCCACAGGTGTGTAGGGGCAACCCA
10	101340306	101340307	883	CACGATCTCGGCTCACTGCAACCTCCACCTCCTGGGTTCAAGCGATTCTCCTGCCTCGGCCTCCCAGGCAACTGGGATTACAGGCATGCACCACCATGCCCAGTTAATTTTGTATTTTTAGTAGAGATGGGGTTTCACCATGTTGGTCAGGCTGGTCTTAAACTCCTGACCTCAAGTGATCCACCCACTTCAGCCTCCCAAAATGCTGGGATTTCAGGTGTGAGCCACCACGCCCGGCCTGTCATCTGTATTTTT
10	101384913	101384914	102	CCACCGCAAGGGTCTGCGGCTTCATTCCTGAAGTCAGCGAGACCACGAATCCACCGGGAGGAACAAACAACTCCGGACACGCCACCTTTAAGGCTGTAACACT
10	101587734	101587735	216	GGGTGGGTTGCCCCTCCACAGCTGTGGGTGTTTCTCGTAAGGTGGAACGAGAGACTTAGGAAAGAAAAAGACACAGAGACAAAGTATAGAAATAAGGGGACCCGGGGAACCAGCGTTCAGCATATGGAGGATCCCTTATTTCTATACTTTGTCTCTGTGTCTTTTTCTTTCCTAAGTCTCTCATTCCACCTTACGAGAAACACCCACAGGTGTGGAG
10	103048088	103048089	711	TACTTTGGCAAATTGTTGGAGCATTGGTTGATCATTTACTTGGTGATCTGTGCTGAACACTTTATAAAGGACACCACCTTATTTGATCCTTTTAACAACCGCACAAGGTAGGTATTATTGTTGTTCCCAATTTTCGGATGAGGAAATGGGCCACACAAGTTACACAACATACCCAAGTTCATACCAGCTAAGAAGTGACAGAGTCAGGCCGGGCGCGGTGGCTCATGCCTGTAATCCCAGCACTTTGGGAGGCCG
10	103488479	103488480	558	TGGGATTACAGGCATGAGCCACTGCTCCCAGCCCATTCTACATCTTTCTAAACATATTCCTAATATCTTAAATGATAGATTAGTAGCACTCTATTATTATTTTTTTAATTAAAAAAAACTTTTGGCGGGACGCAGTGGCTCTCGTCTGTAATCCCAACACTTTGGGAGGCTGAGGCAGGTGGATCACTTGAGGTCAGGAGTTCAAGACCATCCTGGCCAACATGGTGAAAGCGTCTCTACTAAAAATACAAAAAT
10	103614842	103614843	1515	CAAAAAAAAAAAAAAAAAAAAGGTATGATTTTCCATATCACTGTCCTCAGATGCAAGGAATAACTCCAGGCCCTCCTGGCTACCATGTAACCAGCTGATTCATTTTATTTGAATACATCAGACACTTTTTCTTTTTTCCCCTCCCTCACATCAGATACTTCCATTTTCTATTTCCGTTTTTTCTATTTGTTTCCATCTCAATAGCCTTCATCCATTGGGCACCTCCTATTTGCTAGGCCCTATCATTTTTTTTAA
10	10365526	10365527	174	GGACCCAGAAGCCAATGGAAAGACCCCCAATGGCTAGCCCTAAAACTATACAAGATGACCCTCGAACATGTTGTACTTCCAGAAAGTAAGGAAATGTTTTATCACGCACACACATACACACACATACATACACACACAGACACATATATTCACAGTGATGGGGAGTACATCAAAG
10	104754962	104754963	469	AAGGGGAGGAAGGGGAGGAGGAGGAGGAAGAGGAAGGGGAGGAGGAGGAGGAAGAGAGAAAGGGGAGGAGGAGGAGGAAGGGGAGGAGGAGGAGGAAAGGGGAAGTGGAGGAGGAAGAGGAGGAGGAGGGGGAGGGAGAGGAGGAGGAGGGAGGAGGAGGAGGAGGAGGGGGAGGAGGGAGGAAGAGGAAGAGGGGAGGGGAAGAGGGGAGGAAGAGGAAGAGGGGAGGAAGAGGAAGAGGGGGAGGAAGAGGAA
10	1057049	1057050	87	CACCCCGAGACTCTGGTGTGGAGATGCTGGGCCCCTTCATTCTCCTGCATCCCTCCATCCTGACTGTGCCTCCTGCACCTCTTCCCTC
10	1057408	1057409	64	CTCTCAGCTGAGCTCTCTGAAACATGCTAACATGCTTATACAATACTTGCTGTCCTGCCTTCTCC
10	105795872	105795873	171	CACACACACCCATACACAGTCATACACACACCCCATACACTCCCATACACACACACTCTCCCATACACACACCCATACTCACACTCCCATACACACACCCATACGCACACTCCCACTCACACTCACTCCCATACACTCCCATAGACACACACACTCCCATACACACACATAT
10	105817198	105817199	193	TAAAAGATTGCCTCCTCCGCCGGGCGCGTGGCGGGCGCCTGTAGTCCCAGCTACTCGGAGGCTGAGGCAGGAGAATGGCGTGAACACCGCGGAAGCGGAGCTTGCAGTGAACCGAGATTGCGCCACTGCAGTCCGCAGTCCGGCCTGGGCGACAGAGCGAGACTCCGTCTCAAAAAAAAAAAAAAAAAAAAAAA
10	106437929	106437930	315	TAAGAATACACGGCTGGGCGCGGTGGCTCACGCCTGTAATCCCAGCACTTTGGGAGGCCGAGGCGGGCGGATCACAAGGTCAGGAGATCGAGACCATCTTGGCTAACACGGTGAAACCCCGTCTCTACTAAAAATACAAAAAATTAGCCGGGCGCAGTGGCGGGCGCCTGTAGTCCCAGCTACTCGGGAGGCTGAGGCAGGAGAATGGCGTGAACCTGGGAGGCGGAGCTTGCAGTGAGCCAAGATTGTGCCACT
10	107891559	107891560	292	TTTTTTTTTGAGACGGAGTCTCGCTCTGTCGCCCAGGCTGGAGTGCAGTGGCGCGATCTCGGCTCACTGCAAGCTCCGCCTCCCGGGTTCACGCCATTCTTCTGCCTCAGCCTCCCGAGTAGCTGGGACTACAGGCGCCCGCTACCACGCCCGGCTAATTTTTGTATTTTTAGTAGAGACAGGGTTTCACCGTGTTAGCCAGGATGGTCTCGATCTCCTGACCTCGTGATCCGCCCGCCTCGGCCTCCCAAAGTG
10	108991285	108991286	322	TAAAATGTGTAATATGCGGCCGGGCGCGGTGGCTCACGCCTGTAATCCCAGCACTTTGGGAGGCCGAGGCGGGCGGATCACGAGGTCAGGAGATCGAGACCATCCCGGCTAAAACGGTGAAACCCCGTCTCTACTAAAAATACAAAAAAATTAGCCGGGCGTAGTGGCGGGCGCCTGTAGTCCCAGCTACTTGGGAGGCTGAGGCAGGAGAATGGCGTGAACCCGGGAGGCGGAGCTTGCAGTGAGCCGAGATCC
10	109124161	109124162	54	TGGCAAACTGACATGGTGCACCCAGCAGTGCACCATGTCAGTTTGCCATTGTCCG
10	110453468	110453469	841	AAGTCTCCATGAACAGACACTTCTCAAAAGAAGACATTTATGCAGCCAAAAAACACATGAAGAAATGCTCATCATCACTGGCCATCAGAGAAATGCAAATCAAAACCACTATGAGATATCATCTCACACCAGTTAGAATGGCAATCATTAAAAATTCAGGAAACAACAGGTGCTGAAGAGGATGCGGAGAAATAGGAACACTTTTACACTGTTGGTGGGACTGTAAACTAGTTCAACCATTGTGGAAGTCAGTGT
10	113015645	113015646	51	TCCGAGCGGGGGGAGACAGGATTGTAGCCCTTTCAGACAACATGGGTAACCA
10	113097481	113097482	139	GCATTTCCAACTCTGGGGGTAGCCAATGCTGAGATAGGACTTTCTGGCTCCCGCAGCTGCTGTGTTTTAGAGGAAATAAATCAGGTTTGGGTACATGCTCACTTGCATGCTCCTTGGTCCCATTGAATGGAAGAAACAGC
10	11326016	11326017	1122	TGGATGGAGGGGTGGGTGGATGATGGATGAGTGTGTGGTAGGTGGATGATGGATGAGTGTGTGGTGGGTGGATGAGGGATGAGTGGTGGGTGGATGATGGATGAGTGTGTGGTGAGTGGATGAGGGATGAGTGTGTGTGGTGGGTGGATGAGGGATGGAGGGGTGGGTGGATGATGGATGACTGTGGTAGGTGGATGATGGATGAGTGTGTGGTGGGTGGATGAGGATGAGTGTGTGGTGGTGGATGATGGATGA
10	114073858	114073859	308	TAAAATATTGAGTTTCTGGCCGGGCGCGGTGGCTCACGCCTGTAATCCCAGCACTTTGGGAGGCCGAGGTGGGCGGATCACGAGGTCAGGAGATCGAGACCATCCTGGCTAACAAGGTGAAACCCGTCTCTACTAAAAATACAAAAAATTAGCCGGGCGTGGTAGCGGGCGCCTGTAGTCCTAGCCACTCGGGAGGCTGAGGCAGGAGAATGGCGTGAACCCGGGAGGCGGAGCTTGCAGTGAGCCGAGATCGCG
10	115407408	115407409	106	CGGTGGTACTGTCTCCCCCGGTGGTACTTCCTCCCTAGTGGTACTGTCTCCCCCGGTGGTACTGCCTCCCCCGGTGGTACTGCCTCCCCCGGTGGTACTGTCTCCCC
10	117006343	117006344	321	TAAGAATGAGAGAGATGGCCGGGCGCGGTGGCTCACGCCTGTAATCCCAGCACACTTTGGGAGGCCGAGGCGGGTGGATCATGAGGTCAGGAGATCGAGACCATCCTGGCTAACAAGGTGAAACCCCGTCTCTACTAAAAATACAAAAAATTAGCCGGGCGCGGTGGCGGGCGCCTGTAGTCCCAGCTACTCGGGAGGCTGAGGCAGGAGAATGGCGTGAACCCAGGAAGTGGAGCTTGCAGTGAGCCGAGATTG
10	118150283	118150284	359	TCCTCCTCCTCCTTCTCTTATTCTTCCTCCTCCTTTTCCTCCTCCTCCTTTCTCTTCCTTCTCCTCCTCCTTTTCTCCTTCCTTCTCTTCTCCTTCTCCTCCACCTTCTCTTCTTCCTTCTCCTTCTGCTCCTCCTTCTCCTTCTTCTTGTTCCTCCTTTCTCCTCCTCCTCCTTTCTCCTTCCTCCTCCTCCTTTCTCCTTCCTCCTCCTTTCTCCTTCCTCCTCCTCCTTTCTCCTTCCTCCTCCTCCTTCCT
10	118491838	118491839	56	AACAAAGAAAGAAAGAAAGAAAGAAAGAAAGAAAAGAAAGAAAGAAAGAAAGAAAGA
10	119957755	119957756	136	ATGCATATATGTTTATATTGATATATAAGCATATATGCATATGTGTTTATATATTGATATATAAACACATATGCATATGTGTTTATATTGATATATAAACATATATGCATATGTGTTCATATATCAATATAAACACA
10	120602880	120602881	174	ATAGCAGAGAGGAGCTACCCTCTCTGCTGATAGCTGAACACTTGCCAGGACAACCTGCATAGCAGAGAGGAGCTACCCTCTCTGCTAGGAGCTGAACACTAGTCGGGACAACTTGCATAGCAGAGAGGATCTACCCTCTCTGCTGATAGCTGAACACCTGCCAGGACAACTTGCA
10	120769119	120769120	321	CTTTTTTTTTTTTTTTTTTTTTTTTTTTGGGACGGAGTCTCGCTCTATCGCCCAGGCTGGAGTGCAGTGGCACGATCTTAGCTCACTGCAAGCTCCGCCTCCCGGGTTCACGCCATTCTCCTGCCTCAGCCTCCCGAGTAGCTGGGACTACAGGCGCCCGCCAACGCTCCCGGCTAATTTTTTGTATTTTTAGTAGAGACGGGGTTTCACGTGTTAGCCAGGATGGTCTCGATCTCCTGACCTTGTGATCCGCCT
10	121072610	121072611	105	GATGGTAATGATGGTAGTGGTGATGGTGGTGGTAATGGCAGTGGTGATGGTGGTGGTGGTAATGATGATGGTGGTGGTGATGGTGGTGGTGGTGGTGATGGTGGTG
10	121186839	121186840	56	AGTGATGCTGTTGATGGTGGTGGGATATTGATAACAGCAGTGATGCTGATGATGGCG
10	121306836	121306837	1984	GCTCCGTCCCCCAGGCTGGAGTGCAGTGGCGCGATCTCGGCTCATGGTAACCTCTGCCTCCCAGGTTCAAGCGGTTCTCCTACCTTAGCCTCCTGAGTAGCTGGGATTACAGGTGTGTGCCACCACATCCGGCTAATTTTCGTATATTTTAGTAGAGACGGGGTTTCACCATGTTGGCGAGGCTGGTCTCAAAATCCTGACCTCGTGATCCACCTGCCTCGGCCTCCCAAAGTGCTGGGATTACAGGTGTAAGCC
10	12455583	12455584	870	TATCATCATCATCACCAATGTCATCATCATCATCACCATTATCACCACCATACTCATCAACATTATCACCTTCATCACCATCATCATCACCACTGTCATCATCACCATCATCATCACCACCACCAGTACTATCATCATCATCACCAATGTCATCATCATCACCATTATCACCATCATACTCATCATCACCATTATCACCATCATCACCATTGTCATCATCACCATCATCACCACCACCAGTACTATCATCATCAT
10	124563817	124563818	338	TTTTTTTTTTTTTTTTTTTTTTTTTTTTTTTTTTTTTTTTTTTTTTTGAGACGGAGTCTCGCTCTGTCGCCCAGGCTGGAGTGCAGTGGCGCGATCTCGGCTCACTGCAAGCTCCGCCTCCCGGGTTCACGCCATTCTCCTGCCTCAGCCTCCCGAGTAGCTGGGACTACAGGCGCCCGCCACTACGCCGGCTAATTTTTTGTATTTTTAGTAGAGACGGGTTTCACCGTGTTAGCCAGGATGGTCTCGATCTCC
10	12457208	12457209	313	TAAAAACAAAGTGGGCTGGGCGCGGTGGCTCACGCCTGTAATCCCAGCACTTTGGGAGGCCGAGGCGGGCGGATCACGAGGTCAGGAGATCGAGACCATCCCGGCTAAAACGGTGAAACCCCGTCTCTACTAAAAATACAAAAAATTAGCCGGGCGTAGTGGCGGGCGCCTGTAGTCCCAGCTACTCGGGAGGCTGAGGCAGGAGAATGGCGTGAACCCGGGAGGCGGAGCTTGCAGTGAGCCGAGATCCCGCCA
10	124735993	124735994	317	TTTTTTTTTTTTTTTTTTTTTTTTGAGACGGAGTCTCGCTCTGTCGCCCAGGCTGGAGTGTAGTGGCGCGATCTCGGCTCACTGCAAGCTCCGCCTCCCGGGTTCACGCCATTCTCCTGCCTCAGCCTCCCGAGTAGCTGGGACTACAGGCGCCCGCTACCACGCCTGGCTAATTTTTTGTATTTTTAGTAGAGACGGGGTTTCACCGTGTTAGCCAGGATGGTCTCGATCTCCTGACCTCGTGATCCGCCCGCC
10	125014476	125014477	1165	CACCACCATCATCACACCACCACCACCATCGTCATCACTATCATCATCATCATCACACCACCACCACCACCACCATCACACCACCACCACCATCGTCATCACTATCATCACACCACCACCATCATCACACCACTACCATCATCACACACCACCACCACCGTCACACAACCACCACCATCATCATCACTACCACCATCATCATCACACCACCACCACCATCACACCACCACCATCATCATCACTACCACCATCATC
10	125014725	125014726	56	TCACCATCATCACACACCACCACCACCACCATTACCATCACCATCATCACACACACC
10	1255417	1255418	288	TGCCCATGCCTACACTGTCGCCCATGCCCACACCTACAGCCTGGCCCACACCCACACCATCACCCACACCCATGCCCATGCCTACACTGTCGCCCATGCCCACACCTACAGCCTGGCCCACACCCACACCATCACCCACACCCATGCCCATGCCTACACTGTCGCCCATGCCCACACCTACAGCCTGGCCCACACCCACACCATCACCCACACCCATGCCCGTGCCTACACTGTCGCCCATGCCCACACCTACAG
10	125664388	125664389	61	TCCCATCCCACCACCCACCTGGAGGGCCCGAGCTCTGCATTACATCTGCATCCTGTGACCTC
10	125695617	125695618	150	GATGATAATCATGATGGTAATTATGATGATGGTGATAATGGTGATGATGGAAAAGATGGTGGTGATGATGGTGATGGTGAGACTAATGGTGATAATGGTGGTGGTGGTAATGGTAAAGATGCTGGTGATGATGGTAAAGATGCTGGTGATA
10	126019508	126019509	95	CCTTATTTGGAAATAAGGACTTTTCGGATGTCTGCAGTGAGCATGCAGACACAGATCCAGGAATTGATCACGCTCACTGCAGACATCCGAAAAGTC
10	12665465	12665466	54	AAGAGAGGAAAGGAGGGAGGGAGGAAGGAAAGAAGGAAGGGAGGAAGGAGGGAGG
10	12667638	12667639	325	CCATTCTCTTTTTTTTTTTTTTTTTTTGAGACGGAGTCTCGCTCTGTCGCCCAGGCCGGACTGCGGACTGCAGTGGCGCAATCTCGGCTCACTGCAAGCTCCGCTTCCCGGGTTCACGCCATTCTCCTGCCTCAGCCTCCCGAGTAGCTGGGACTACAGGCGCCCGCCACCGCGCCCGGCTAATTTTTTGTATTTTTAGTGAGAGACGGGGTTTCACCTTGTTAGCCAGGATGGTCTCGATCTCCTGACCTCATG
10	127197228	127197229	768	ATTTCTGTGTTGCAAGCCCATAGCTCAGTGGTGGGTCAGTCACCTTTAATAAGATGCAGGGCATCCCCATTACTAGGCAGCATGGCAGGGGCACAGATGGCATTGGACTGCGGCAAGGGTATGGGGTGATAAGTAATGATATCAGGAAGGGACATTAAAAATATGTGTGCCTGCGCCACTGCACTCCAGCCTGGGCGACAGAGCTAGACTCCGTCTCAAAAACAAACAAACACACAAAAAAACGTGTGTGCAGCC
10	127513363	127513364	420	AAAGCCAATGCAGCAATCTAAGCAGAGGGTCCCTCATTCCCAGGTGATTTAGAATTAAGACTGTGGTGGTGTGATAGATTTCCCATGTTAACACAAGCAGCATTGATTTCTATATAACCAAAAGTAATAAAAGAGCCAGTCAAAGTTCTAAGTGAAAAATGGTGAGATGGCATTCAAGGCATAGAGCCAAAGTAAAATTTGTAAGGGAAGGAAGATTGATCACATACCCACACCATGGTGTCACCTCTAATCCTG
10	127940268	127940269	768	CCATCCATCCATCCATCCTCTCCATCCCATCCATCCATCCTTCCTATCCATCCCATCCATCCCATCCATTCATCTATCCATCCATCCTATCCATCCCGTCCATTCATCCATCCATCCCATCCATCCTGTCCATTCATCCATCCATCCCATCCATCCACCCATCTATCCTATCCATCCATCCATCCATCCTGTCCATCCCATCCATTCATCCCATCCATCACATCCATCCCATGTGTCCATCCCACCCATCACATC
10	128580646	128580647	699	GGTATGTGGGTTGTGTATGTAGTGTGTATGTGTATGTGTGGTGTGTATGTGTGTACGGTGTGTGTGTGTGTTGTATATGGTGTGTGGGTTGTGAATGTAGTGTGTAGTGTATGTTTATGTGTGATGTGTATGTGTGTGTGGTGTGTGTGTGACGGTGTGGTGCATATGTGTGTATGTGCATGTGGCATGTGTGATGGTGTGTGGTGTGTGTGTTATGGTGAGTGGTATGGGGTGTGCATGATATGTATGTGTGTA
10	12867144	12867145	102	GTTGCGGTTTCTTCCATTAAAATTGCCATGAGATTTGAAAATAGTTTTTATTTTCCTAGTATTGGTACTTTTGTCTGAAAGATTTAGGTTGGGGCAAAAGTAA
10	129161104	129161105	275	GGGGGGAGGTGCATGTGTGTGTGTGTGGGGATGTGCATGTGTACGTGTGTGTGGGGATGTGCGTGTGTGTGTGGGGGATGTGTATGTGTGTGTGTGTGTGTGGGGATGCGCATGTGTGTGTGTGTGTGTGTGTGGGGATGTGCATGTGTATGTGTGTGGGGGGACGTGCATGTGTATGTGTGTGTGGGGAATGTGTATGTGTGTGTGTGGAGATGTACATGTGTATGTGTGTGTGGGGGATGTGTATGTGTATGT
10	129190297	129190298	313	GATGCGGCCGGGCGCGGTGGCTCACGCCTGTAATCCCAGCACTTTTGGGAGGCCGAGGCGGGCGGATCACGAGGTCAGGAGATCGAGACCATCCCGGCTAAAACGGTGAAACCCCGTCTCTACTAAAATACAAAAAATTAGCCGGGCGTAGTGGCGGCGCCTGTAGTCCCAGCTACTTGGGAGGCTGAGGCAGGAGAATGGCGTGAACCCGGGAGGCGGAGCTTGCAGTGAGCCGAGATCCCGCCACTGCACTCC
10	129502934	129502935	124	CGATATATATATCGATATATATATGATATATATATGATATATATATTGATATATATATGATATATATATTGATATATATATGATATATATATTGATATATATATGATATATATATTATATATAGA
10	129595751	129595752	983	CCCCAGCCCCACCCTCCATTCATCCCACACCCTCCATCCATCCCTCACCCTCTATCCATCCCACACCCTCCATCCATCCCTCACCCTCTATCCATCCCACACCCCCATCCATCCCTCACCCTCCATCCATCCCACACCCTCCATCCATCCCACACCCTCCATCCATCCCACACCCTCCATCCATCCTTCACCCTCCATCCATCCCTCACCCTCCATCCATCCCACACCCTCCATCCATCCTTCACCCTCCATCCA
10	129865545	129865546	57	GGCGTGTGTGTGCACATGTGTGAATGTGCATGTGTGCATCTTGTGCGTGTGTGGGTGC
10	130017653	130017654	278	GAGTGAGTGGGTGGGTGAGTGAGTGAGTGGGTGGGTGAGTGAGTGGGTGGTGAGTGGGTGAGTGAGTGAGTGGTGAGTGAGTGAGTGAGTGGTGAGTGGGTGGGTGGGTGAGTGGGTGAGTGAGTGAGTGGGTGGTGAGTGAGTGTGAGTGGGTGGGTGAGTGAGTGAGTGGTGGGTGAGTGAGTGAGTGGGTGGGTGAGTGAGTGAGTGGGTGAGTGAGTGAGTGGGTGGGTGAGTGGGTGAGTGAGTGAGTGG
10	13008246	13008247	72	CTCAGTTACCAGCCTTACTCATATTACTATATGGTACTCAGTTACCAGCCTTACTCATATTACTATATGGTGC
10	130262879	130262880	2427	CCTCCCATCCTCCCTCTAGACTTCTCCTCCTCCTCCCATCCTCCCCTCTAGACTTCTCCTCCTCCTCCTCCCATCCTCCCCTCTAGACTTCTCCTCTCCTCCTCCCATCCTCCCCTCTAGACTTCTCCTCCTCCTCCCCATCCTCCCCTCTAGACTTCTCCTCCTCCTCCCCCCATCCTCCCCTCTAGACTTCTCCTCCTCCTCCACCATCCTCCCCTCTAGACTTCTCCTCCTCCTCCACCATCCTCCCTCTAG
10	130381581	130381582	614	AGATACATGCATAAACAGATTGTGGATTGTAGATAGGTAGATAGAAGGTAGACAGATGATAGATAACAGATAGACAGACAGACAGACAGACAGACAGACAGATAGATAGATAGATCAGAGATAGGTAATAGATGGATAGATAGATAGATAGTGGATGCATAGATGAATGGATTGTAGATAGAGATAGAGAGATAGATGAATAGATAGATAGATAGATAGATAGATAGATAGATAGATGATACATAGATGAATCGT
10	130381731	130381732	239	CTAACATCTACCTATCTTGTATCTATCTACTTGTCTACAAACGATTCATCTATGTATTATCTATCTATCTATCTATCTATCTATCTATCTATCTATCTCTATCTTCTATCTACTAGTCTACAAACCATTCATCTATGTATCTATCTATCTCTCTATCTATCCACATATCTTCTATCTACTTGTCTACAAACGATTCATCTATGTATCATCTATCTATCTATATCTATCTATCTATCTATC
10	131880074	131880075	1680	TCATTGCATTGACACTTTTATCAATAAAAATGAAAGAATGAAAATTAATTAATAATTCCCAGCCAGGCACGGTGGCTCACACCTGTAATCCAGCACTTTGGGAGGCTAAGGCAGGCAGATCGCTTGAGGCCAGGAGTTTGAGACCAACCTGGGCAATATGGTACCCTGTCTCTACCAAAAAATATAAAAATTAGCCAGGCATGGTGGTGCACCTGTAGTCCCAGCTACTCAGGAGGCTGAGGTAGGAAGATTGAG
10	131894835	131894836	98	ATGATGGTTTCCAGCTTCATCCATGTCCCTGCAAAGGACATGAACTCATCCTTTTTGAGGGCTGCATAGTATTCCATGGTATATATGTACCACATTTTC
10	132136824	132136825	80	TGTGTGTGAGTGTGTGTGAGTACATGTATGTGCGTGTGTGTGTGTGAATGTGATTTTACAAATGTGTGTGAGCGTGAGTGT
10	132294720	132294721	422	GGAGGTAACCTTCTGCATGATGACTTCTCTAGTACACGGGATGGAGGTAACCTTCTGCATGATGACTTCGCTAGTACACGGGATGGAGGTAACCTTCTGCATGATGACTTCGCTAGTACACAGCGGATGGAGGTAACCTTCTGCATGATGACTTCGCTAGTACACGGGATGGAGGTAACCTTCTGCGTGATGACGTTGCTAGTACACGGGATGGAGGTAACCTTCTGCATGATGACTTCGCTAGTACACGGGATA
10	132307248	132307249	51	CGGAAAATACTTACAATGGAGGCAGAACAGATTCCTTGAGTGGCCCTCTCAA
10	132371281	132371282	164	CCCAGACAACAGGAAGAAACACTAGTGGGAATCCCAGGAGACCAGGAAGAAACACTAGTGAGAATCCCAGGACAACAGGAAGAAACACTAGTGAGAATCCCAGGAGACCAGGAAGAAACACTAGTGAGAATCCAGGAGACCAGGAAGAAAACACTAGTGAGAATC
10	132588766	132588767	483	TCTGTGATTGTGTACGCATGAGTTGTGTGTGGTGGGAGTGTCCGTGTGTATGTGTGAGTAGTGTGGTGGGAGTGTGTGGAATGTGTATGTGTGGGTAGAGTGTGGTGGGAGTGTCTGTGTGGGGGGAAGTGTGTATTGGGTGTGTATGTCTGTGTTGTGTGTGGGTGGTGTGTATGTGGTGTGTGAGTGTGTGTGTGAGTAGAGTGTGGTGGGAGTGTCTGTTTTTGGGGGGCAGTGTGTGGTGGGTGTGTATGT
10	132588926	132588927	483	TGTGTGGGGAAAGTGTGTATTGGATGTGTATGTTTGTGTTGTGTGTGGGTGGTGTGTATGTGGTGTATGAGTGTGTGTGTGGGTAGAGTGTGGTGGGAGTGTCTGTGTGGGGGGGTGAGTGTGGTGGGTGTGTATGTTTGTGGTGTGTGCTGTGTATGTGGTCTATGAGTGTTTATGCATGGGTTGTGTGTGGTGGGAGTGTCTGTGTGTGTATGTGTGGGTAGTGTGAGTGTGAGTGTGTATGTGTGAGTTGAG
10	132842645	132842646	153	AAGACCTCAGTCCTGGGAACACCAGAAGCCCTCTGTCCTGGGGAGCACTGGAAGTCCTCAGTCCTGGGGAGCACTGGATACCCTCACTCCTGGAGAGCACTGGAAGCCCTCAGTCCTGGGAGCACTAGAAGCCCTCACTCCTGGGAGCACTGAA
10	132975112	132975113	149	CAAAGAGACACGTGCACACACACCAAAACACATGCACACACAGAGAGACACAGGCACACACACCAAGACATGTGTACACAGACACATGCACACAGAGACACGTGCACACACAGACATGTGTACACACACAGTGTACACACACAGAGATAG
10	133285082	133285083	417	ATGTGTGTTTATGCCCATGTTCACATGTGTACACTATGTGTATGTGTGTTTATGCTCATGTTTGCATGTATACATTATGTGTATGTGTGTTTATGCTCATGTTTGCATGTGTACATGTGTATGTGTGTTTATGCCATGTTCACATGTGTACATTATGTGTATGTGTGTTTATGCCCATGTTCACATGTGTACATTATGTGTATGTGTGTTTATGCTCATGTTTGCATGTGTACATGTGTATGTGTGTTTATGCTC
10	133310702	133310703	496	CATAAACCATACACACCACACATATACATAACACACACCCAAAACACACATGACACACACATACACACATAAACAGACACACCACACAAAGAACACAAAACACATGCACACACACAACACACACCCACAACACATAACATATGCACACACATAAACCATGCACACCACACATGTACACAACATACACCCAAAACGCACATGACACAAACATACACACATAGCCCTACACACCACACATAGAACATACAATACAAC
10	133652169	133652170	230	GCAAACCTGTACTGGAGTTAGGCAAGATGCTCCATGGGGGAACTGGGTGAAGGGCTGCGACCCTGTACTGGAGTGAGTTAGGCAAGATGCTCCATGGGGAAACTGGTGAAAGGCTGTGACCCTGTACTGGAGTTAGGCAAGATGCTCCACAGGGGAACTGGGTGAAGGGCTATGACCCTGTACTGCAGTGAGTTAGGCAAGATGCTCCGTGGGGAACTGGGTGAAGGGCTG
10	133652312	133652313	60	ACGATGCTCCATGGGGGAACTGGGTGAAGGGCTATGACCCTTTACTGGAGTGAGTTAGGCA
10	133656299	133656300	601	TCCACCTACACCCCCACAGGAGACGCAGGCCCCAGATAGGAAGTCCGCCTGCACCCCCACAGGAGATGCAGGCCCAGATAGGGAGTCCACCTGCACCCCCACAGGAGACGCAGGCCCCAGATAGGGAGTCACCTGCACCCCCACAGGAGACGCAGGCCCCAGATAGGGAGTCCACCTGCACCCCCACAGGAGACACAGGCCCCAGATAGGGAGTCCACCTACACCCCCACAGGAGACGCAGGCCCCAGATAGGGA
10	133656610	133656611	84	CCACAGGAGACGCAGGCCCCAGATAGGGAGTCCGCCTAAACCCCACAGGAGACGCAGGCCCCAGATAGGGAGTCACCTGCACCCC
10	133968513	133968514	375	ATAATGGTTATGGTGATGACGGTGGTGGTGATGATGATGATCATGATGATGGTGGTAGTGGCAATGGTGATGATGATGGTGATCATGGCGGTGATCATGATGGTGGTGGTAGTGGTGATGGTGGTGGTGATGATGGCAATGATCATGATGGTGGTGGTAGTGGTGATGGTGATGATGATGGTGATCATGGTGACGATCATGATGGTGGTGGTGGTGATGGTGGTGGTGATGATGGCAATGATCATGATGGTGGTG
10	134029012	134029013	334	TCCGGCCGGGCGCGGTGGCTCACGCCTGTAATCCCAGGCACTTTGGGAGGCCGAGGCAGGGCGGATCACGAGGTCAGGAGATCGAGACCATCCTGGCTAACACGGTGAAACCCCGTCTCTACTAAAAATACAAAAAATTAGCCGGGCGAGGTGGCGGCGCCTGTAGTCCCAGCTACTCGGGAGGCTGAGGCAGGAGAATGGCGTGAACCCCAGGGGGGCGGAGCCTGCAGTGAGCCGAGATTGCGCCACTGCACT
10	134081295	134081296	87	CTGTCTGTGTGCATGCATGTCCACATCGTGTGTGTGTGTGTCGGTGCGTGTGCATGCATGTGTATGCAGGTTCAGCTCTATGCCTGTC
10	134177851	134177852	89	CATCTACCTCCACACCCGCGCTTACACCCACGCTTACATCTACCTCCACGCCCACACTCACACCCACCCACACTTACACCCACGCTTACA
10	134326048	134326049	369	TGGGTCACTGGAGATAAGAGGAGGGCTCGGGTGGACCTAGGTCGTTGGGGATGAGAGGAGGGCTCGGGTGGACCTGGGTCACTGGAGATAAGAGGAGGGCTCGGGTGGACCTAGGTCGTTGGGGATGAGAGTAGGGCTCAGTAGACCTGGGTCGTTGGGGATGAGAGTAGGGCTCAGTAGACCTGGGTCGTTGGGGGTGAGAGAAAGACCGTGGTGGACCTGGGTCATTGGGGATGAGAGGAGGGCTCAGGTGGA
10	134328148	134328149	224	TGTGTGCATGTTTGTGTGGTGTGTGTATGTGTGTGTGGTATGTGTGTGGTGTGCGGTGTGTGTGTGTGGTATGTATATGTATGGATATGTGGTGTGTGTGCATGTGTGTGTGGTATGTATATGCATGTATGTATGGTGTGGGGGGTTGTGTATGCTGTATTTGTGGTATGTGTGTGGTGTGTGTATGTGTGGTATATGTTGTGTGTGTGTGTGTGGTATGTATGT
10	134924933	134924934	252	AGGCACCTCCCTCCTAATCCCTCCAGACAACCTGCCCACCACGGGCACCTCCCTCCTAATCCCACCAGACCACCTGCCCACCACAGGCACCTCCCTCCTAATCCCACCAGACAACCTGCCCACCACGGGCACCTCCCTCCTAATCCCTCCAGACCACCTGCCCGCCACGGGCACCTCCCTCCTAATCCCTCCAGACCACCTGCCCACCACGGGCACCTCCCTCCTAATCCCACCAGACCACCTGCCCACCACA
10	134925120	134925121	714	CTCCAGACCACCTGCCCACCACGGGCACCTCCCTCCTAATCCCACCAGACAACCTGCCCACCACGGACACCTCCCTCCTAATCCCACCAGACAACCTGCCCACCACGGGCACCTCCCTCCTAATCCCACCAGACAACCTGCCCACCACGGGCACCTCCCTCCTAATCCCTCCAGACCACCTGCCCACCACAGACACCTCCCTCCTAATCCCACCAGACCACCTGCCCACCACAGACACCTCCCTCCTAATCCCAC
10	134925424	134925425	798	ACCTGCCCACCACGGGCACCTCCCTCCTAATCCCACCAGACAACCTGCCCACCACAGGCACCTCCCTCCTAATCCACCAGACCACCTGCCCACCACGGGCACCTCCCTCCTAATCCCACCAGACCACCTGCCCACCACGGGCACCTCCCTCCTAATCCCACCAGACCACCTGCCCACCACGGGCACCTCCCTCCTAATCCCACCAGACAACCTGCCCACCACGGACACCTCCCTCCTAATCCCTCCAGACCACCT
10	135147261	135147262	246	CTCAGAGCCTTCTCCCCCTCAGATCCTTCTCCCTCATGTCCTTCCCCCCTCAGATCCTTCCACCATCAGATCCTTACCCTTCTGATCCTCCTCAGATCCTTCCCCGTTCAGAGCCTTCCACTCTCAGATCATTCCGCCCTCAGATTTTTCCCCCTCAGGTCCTTCCTCCTCAGGCGCTTCCCCTCAGATCCTTCCCCTTTCAGATCCTTTCACCCTCAGATCCTTCTGTCCACAGATCCTATCCCGC
10	135254862	135254863	219	CGTCTGTCGGGGTCTGGGTCGGGGTCCATCGGTGTCTGGGTCAGCGTCTGTCGGGGTCTGGGTCGGGGTCCATCGGTGTCTGGGTCAGCGTCTGTCGGGTCTGGGTCGGGGTCCATCGGTGTCTGGGTCAGCGTCTGTCGGGGTCTGGGTCGGGGTCCATCGGTGTCTGGTCAGCGTCTGTCGGGGTCTGGGTCGGGGTCCATCGGTGTCTGGGTCAGCG
10	135458660	135458661	6252	GAAAAGAAAGAGAGATCAGACTGTTACTGTGTCTATGTAGAAAGAAGTAGACATAAGAGACTCCATTTTGCTCTGTACTAAGAAAAATTCTTCTGCCTTGAGATGCTGTTAATCTGTAACCCTAGCCCCAACCCTGTGCTCACAGAGACTTGTGCTGTGTCAACTCAAGGTTTAATGGATTTAGGGCTATGCAGAATGTGCTTTGTTAAAAAAGTGCTTGAAGGCAGTATGCTTGTTAAAATTCATCACCACTCT
10	1411061	1411062	66	CCTGTGGTCCTGTGGCAGTCGTGGGGCCAGGCAGGGTGAGGGTGGGAGCCGAGCTCGCCCTGTGGTC
10	14610390	14610391	206	CAGTATCTTCACCTCCTGGTCTAACCCTGGGATCATCAGCCAGCCTCCTCCTCCAGTATCTTCACCTCCTGGTCTAACCCTGGGATCAGCCAGCCTCCTCCTCTAGTATCTTCACCTCCTGGTCTAACCCTGGGATCATCAGCCAGCCTTCTCCTCCAGTATCTTCACCTCCTGGTCTAACCCTGGGATCAGCCAGCCTTCTACCTG
10	1516141	1516142	75	TCCCCCGTCGAGGCCTCCCCCATGATCCGGGGGCTCAGCAAGGAAAGGCGTGTCTCCTGCACTAGAAACTACCCGG
10	15191446	15191447	537	CGGTGATGGTGGTGATGATGGTGATGATGATGGTGGTGATGATGATGGTAATGGTGGTGATGATGATGGTGATGATGGTGATGATGATGGTGATGATGATGGTGGTGATGATGGTGATGATGATGGTGATGATGGTGGTGATCATGGTGATCATGGTGGTGATAATGATGGTGATGATGGTGGTGATGATGATGGTGATGGTGGTGATGATGATGATGGTGGTGATGATGGTGGTGATGATGGTGATGATGGTGG
10	15251441	15251442	3776	GTGCCTGTAATCCCAGCTATTCGAGAGGCTGAGGCAGGAGAATCACTTGAACCTGGGAGGCAGAGGTTGCAGTGAGCCAAGATCACGCCATTGCACTCCAGCCTGGGCGACAGAGTGAGACTCTGTCTCAAAAAAATAAATAAATACATAATATTCCGTTGTAAATTCTCTTTAATGATTGGTTCTCACAATGCTTTCATAGATTTTGTCATAGCCAGTCTTGTTACGATTGACAAGAGTGTAGCTCTGACATGA
10	1634446	1634447	190	AGTCTCCCTGCCCAAGCCACACTCTGTAGGTCTCTCCTCTCTGGCATGGTCCCCTCTGTCACCCAGATTCACTCACCCAAGCCACGCTCCATAGGTCTCCTCTCTGGCATGGTCCCCTCTGTCACCCAGATTCACTCACCCAAGCCACCCTCCATAGGTCTCCTCTCTGGCATGGTCCCCTCTGTCACCCA
10	16365447	16365448	316	AAAATACAGCACCCAATTCCTAGTTCAATAGACCCTTCTTTTCTCCTTTTCTAAGAGTAAGAGAGGTCAAACAGGTGTTGTCCTATACAATGTACAAATCATGTGTTAAACAAAAAACAATCTCAAGAGGATTTAGACATACCTCTTTATACTTTTATGAATCTATTACGTGATTTCAGAAAAAAGTAGATAGCAATAAAACCTCCAGTAAAAAAAATAATAATAATAATTTGGTGCATTTGGAATGGGTTTCAT
10	1675745	1675746	58	ATCTATCTATCTATCTATCTATCTATCTATCTATCTATCTATCTATCTATCTATATCTA
10	1714945	1714946	104	GGGAGGGAGGCAGGAGACTTTCCATGCGTGGAGGGAGGCAGGAGCCTTGCGGTGCGTGGAGGAGGCAGGCGGGGGCCTGGAAGGAGGAAAGGGAAGTGCGTGCGT
10	17596901	17596902	56	TATATCATATATGATGTGATATATATCGCATCATATATGATATATAATATATGTCAC
10	17633780	17633781	52	TTTCTTTATAAAACTTAGCTCAAACAGAGCAAAAATACACAATAGGTTTTATG
10	17751963	17751964	310	GGCCGGCGGCGCGGTGGCTCACGCCTGTAATCCCAGCACTTTGGGAGGCCGAGGCGGGCGGATCACGAGGTCAGAGATCGAGACCATCCCGGCTAAAACGGTGAAACCCGTCTCTACTAAAAATAACAAAAAAATTAGCCGGGCGTAGTGCGGGCGCCTGTATCCCAGCTACTTGGAGGCTGAGGCAGAAGAATGGCGTGAACCCGGGAGGCGGAGCTTGCAGTGAGCCGAGATCCCGCCACTGCACTCCAGCCT
10	18239493	18239494	120	TGTGCTTACAATCCTTTAGCTAGACACAAACGTTTCTCCAAGTCCCCACCAGATTAGTTAGACACAGAGCGCTGATTGGTGCTTTTACAAATCTTTAGCTAGACACAGAGTGCTGACTGGT
10	18854996	18854997	135	TAGAGTAGAATGGAGAATGGAATAGAGTGGAATGGAGAATGGAATGGAATGGAGAATGGAATGGAATGTGGAATGGAATGAAATGTGGAATGGAATGGATTGTGGAATGGAATAGAATAAAGAATGGAGAATGGAA
10	1910126	1910127	76	GTATTTATGTACATTGCAGTATTTATGTAGTATTCATGTACATTGCAGTATTTATTTAGTATTTATGTACACTGTAC
10	19211101	19211102	521	AAAGGCTTTAGACACTTCTCCAAATACTATATACAAATGGCTAATAAGCATATAAAAAGATGTTCAACATCACTAATCATTAAGGAAATGCAAATCAAAACCTTACACTCATCAGGATGGCCACTATCAAAAGAACAAAAAATATTAAGCATTAGTGAGAAAGCAGAGAAGTTGAAACCCTTCCTCACTTTGGGTTGTAATGTAAAATGGTACAGCTATTATGGAAAACAGTATGAAGGTTCTTCAAAAATTTAA
10	21192834	21192835	320	CCGGGCGCGGTGGCTCACGCCTGTAATCCCAGCACTTTGGGAGGCCGAGGCGGGTGGATCATGAGGTCAGGAGATCGAGACCATCCTGGCTAACAAGGTGAAACCCCGTCTCTACTAAAAATACAAAAAATTAGCCGGGCGCGGTGGCGGGCGCCTGTAGTCCCAGCTACTCGGGAGGCTGAGGCAGGAGAATGGCGTGAACCCGGGAAGCGGAGCTTGCAGTGAGCCGAGATTGCGCCACTGCAGTCCGCAGTC
10	23620478	23620479	1055	AGGGAAGGAAGGGAAGGAAGGGAAAGGGAAGGGAAGGGAAAAGGAAAGGGAAGGGAAGGGGAAGGGAAAGGGAAGGGAAGGGAAGAAGGGAAAGGAAGGGAAAAGGAAGGGAAGGGAAAAGGGAAGGGAAGGGAAAAGGGAAGGGAAGGGAAAAGGGAAGGGAAGGGAAACGGGACGGGAAAAGGGAAGGGAAGGGAACCGGGACGGGAAAAGGGAAGGGAAGGGAACCGGGACGGGAAAAGGGAAGGGAAGGGA
10	23775680	23775681	339	CTTGGCCGGGCGCGGTGGCTCACGCCTGTAATCCCAGCACTTTGGGAGGCCGAGGCGGGTGGATCATGAGGTCAGGAGATCGAGACCATCCTGGCTAACAAGGTGAAACCCCGTCTCTACTAAAATAATACAAAAAATTAGCCGGGCGCGGTGGCGGGCGCCTGTAGTCCCAGCTACTCGGGAGGCTGAGGCAGGAGAATGGCGTGAACCCGGGGAAGCGGAGCTTGCAGTGAGCCGAGATTGCGCCACTGCAGT
10	2543719	2543720	63	TGGCGAGGGAGGAAACCGCGCTTTGTTGGTGACGTGAACCGCGTGCATGATCCCGAGGAAGAAG
10	2564785	2564786	102	GGTGTCGGTATCACCTGTATAAGGTGTGGGTGTGGGTGTCACCTGGATAAGGTGTGGGTGTCGCCTGTATAAGGTGTGGGTGTGGGTGTCGCCTGGATAAGGT
10	2565540	2565541	53	GGACGTGGTGTCACCCAGATAAGGTGTGGATGTGGGTGTTACCAGATAAGGTGT
10	2568408	2568409	56	GGAGAGCCCGGAGCTGCCTCCGTAGCTGAAGGCAGCTGACAGGAGCCAGGTAGAAGG
10	2568754	2568755	75	CGTCCAAGATGAAGCTGCTGGTGGTTCCGTGTCTGATCCAGGCCTGCACCTGAGTTTGTCACCTTCTCACCTGGAA
10	25707687	25707688	6048	GAAAATAATCTTTTTTTTTTTTTTTTTTTTTTATTATACTCTAAGTTTTAGGGTACATGTGCACATTGTGCAGGTTAGTTACATATGTATACATGTGCCATGCTTGGTGCGCTGCCACCACTAACGTGTCATCTAGCATTAGGTATATCTCCCAATGCTATCCTCCCCCCTCCCCCGACCCACCACCACAGTCCCCAGAGTGTGATATTCCCCTTCCTGTGTCCATGTGATCTCATTGTTCAATTCCCACCTATG
10	2604820	2604821	220	TAGAAAAATCGACTATGATACATATATATACATATATACATACATATATACATATATATACATATATATACATATATGATACATATATATGTATGTATACTATGATACATATATATATACATGTATATATATATATACATGTATATATTCATGTATATATATATACATGCATATATACATGTATATATACATCTTATATATACATGTTATATATATATATA
10	2709219	2709220	422	TGTATATATATACACACACACACATTATATATACACATTTATGATATATTTATACATATATACACGTGTGTATGTGTGTGTATGTGTATATATGTATATATACATATATGCTTGTTTTGTATATGTGTATATTACATATGTATATATACATGGATATACATATGTATATACATATGTACATGTATGTATACATATAAATGTCTGTATGTATATACATATACATACATCTGTATGTATATATGTGTGTGTGTATAC
10	27696229	27696230	65	ATAAAATTGGTTCTGACAGTTTCTGCTTGTTTTTTTTTTTTTTTGATAATTCTTTGAGAGGACAAG
10	28938627	28938628	825	CACACCCGCCTACTCTATTTTTTTCTAGAAGAAATGCAGTTTAAGTATAGAAACACACAGATAGGCTAAAAGCAAGTGGAAAAAGATGTACCATGCAAACAGTAAGCATAACAGGGTTTGAGTGGCTGTATTAAGGCCAGATAAAATGGACTTCAAGAAAAACATATTTCCAGAGATGAAGAGGGACATTTAATTATAATTAAAATTGTTCCACAGCTAATATTTTACTGAATGGGGAAAAACTGAAAGCTTTTC
10	29102533	29102534	315	ATTTAGGGCCGGGCGCGGTGGCTCACGCCTGTAATCCCAGCACTTTGGGAGCCGAAGCGGGCGGATCACGAGGTCAGGAGATCGAGACCATCCCGGCTAAAACGGTGAAACCCCGTCTCTACTAAAAATACAAAAAATTAGCCGGGCGTAGTGGCGGGCGCCTGTAGTCCCAGCTACTTGGGAGGCTGAGGCAGGAGAATGGCGTGAACCCGGGAGGCGGAGCTTGCAGTGAGCCGAGATCCCGCCACTGCACTC
10	29105285	29105286	312	AAAAGTAAAAATACGCCGGGGCGCGTGGCTCACGCCTGTAATCCCAGCACTTTGGGAGGCCGAGGCGGGCGGATCACGAGGTCAGGAGATCGAGACCATCCTGGCTAACACGGTGAAACCCCGTCTCTACTAAAATACAAAAATTAGCCGGGCGTGGTAGCGGGCGCCTGTAGTCCCAGCTACTCGGAGGCTGAGGCAGGAGAATGGCGTGAACCACCGGAGGCGGAGCTTGCAGTGAGCCGAGATCGCGCCACT
10	2949213	2949214	202	AGATTGCATGTCTGTGTGGGGTTGTGTATTTGGTTGTGTGTGTGTGACTGTGTGCGTGTCTGTGTGGGATTGTGTGTTTGGTTGTGTGTGTGATTGTGTGTGGGTGTTTTTGTGTGATTGTGTGTGTGATTGTGTAGGTGTGTGTGTCTGTGTGAGATTATGTGTGTGTTTGTATGTGTGTGATTGTGTGTGTGTGTGAGAGA
10	30078346	30078347	52	TAGATAGATAGATAGATAGATAGATAGACAGACAGAGAGACAGACAGAGAGAT
10	30614766	30614767	310	TGGGGCCGGGCGCGGTGGCTCACGCCTGTAATCCCAGCACTTTGGGAGGCCGAGGCGGGCGGATCACGAGGTCAAGAGATCGAGACCATCCCGGCTAAAACGGTGAAACCCCGTCTCTACTAAAAATACAAAAAAATTAGCCGGGCGTAGTGGCGGCGCCTGTAGTCCCAGCTACTTGGGAGGCTGAGGCAGGAGAATGGCGTGAACCCGGGAGGCGGAGCTTGCAGTGAGCCGAGATCCCGCCACTGCACTCCA
10	3083763	3083764	2596	TGAGTGCTCAATGGTGCCCAGGCTGGAGTGCAGTGGCGTGATCTCGGCTCACTACAACCTACACCTCCCAGCCGCCTGCCTTGGCCTCCCAAAGTGCCGAGATTGCAGCCTCTGCCCGGCCGCCACCCCGTCTGGGAAGTGAGGAGTGTCTCTGCCTGGCCGCCCATCGTCTGGGATGTGAGGAGCCCCTCTGCCTGGCTGCCCAGTCTGGAAAGTGAGGAGCGTCTCCGCCCGCCGCCATCCCATCTAGGAAGT
10	30896101	30896102	128	CAAAGTGCTGGGATTACAGGCGTAAGCCACCGCTAATTTTTGTATTTTTAGTAAAGACGGAGTTTCACTATATGTTGGCCAGGATGGTCTTGATCTCTTGACCTCGTGATCTGCCCCCCTCGGCTTCCA
10	32320824	32320825	363	CTCCCGAGTAGCTGGGATTACAGGCGCCTGCCACCATGCCCAGCTAATTTTTGTATTTTTAGTAGAGATGGGGTTTCACCACGTTGGCCAGGCTGGTCTCCAACTCCTGACCTCAGGTGATCCACCCGCCTCGGCCTCCAAAGTGCTGTGATTACAGGTGTGAGCCACTGCACCTGGCTGATACCAGGTTTTTCCATGGCATAGCACAAATGTCATCACTTGTTGCTGAAAGCAAATCTAAAATTTTTTTTTTTT
10	32674068	32674069	311	CATGGCCGGGCGCGGTGGCTCACGCCTGTAATCCCAGCACTTTGGGAGGCCGAGCGGGCGGATCACGAGGTCAGGAGATCGAGACCATCCCGGCTAAAACGGTGAAACCCCGTCTCCTACTAAAATACAAAAAAATTAGCCGGGCGTAGTGGCGGGCGCCTGTAGTCCCAGCTACTTGGAGGCTGAGGCAGAGAATGGCGTGAACCCGGGAGGCGGAGCTTGCAGTGAGCCGAGATCCCGCCACTGCACTCCAGC
10	3284543	3284544	136	ACCACATACACTTACACAGACACACCACACATGTGCACAGACACACACACATTCACACACAGAGACACACACAGTACACATGCACATTACACAGACACATAAAACACACACCACACATAGAACACACAGTGACACAC
10	3284908	3284909	198	GTGCGTGTGTCTATGTATGTGTTGGGGTGTGTGTGGTATGTGTATGTATGTGTGAGGGGGTGTGTATGTGTGAGGGTGTGTGTGGGGGTGTGTATGTATAAATGTGTGCATCTCTGTGTGTATGTGTGTGGTATGAATTGTGTGTGTGCATGTGTGCCATGTGAGTGTGTGGGTCTGTGTGTGGGGGGGTGTGTCTGTG
10	32936401	32936402	55	AAGAGAACTTTTTGTTTTTGAGACAGGGTCTCACTCTGTCACCCAAGCTGGAGTGC
10	3369692	3369693	2783	AAGCATTTTTTTTTTTTTTTTTTTTTTAATTTATTTTTTTATTGATAATTCTTGGGTGTTTCTCACAGAGGGGGATTTGGCAGGGTCATGGGACAATAGTGGAGGAAGGTCAGCAGATAAACAAGTGAACAAAGGTCTCTGGTTTTCCTAGGCAGAGGACCCTGCGGCCTTCCGCAGTGTTTGTGTCCCTGGGTACTTGAGATTAGGGAGTGGTGATGACTCTTAACGAGCATGCTGCCTTCAAGCATCTGTTTA
10	3453452	3453453	1188	AGATCACAATGGGAGAGATCCCAAAGGAGAGATCACTACAGGAGAGATCACTATGGGAGAGATCACTACAGGAGAGATCACTACGGGAGAGATCACTATGGGAGAGATCACAACGGGAGGGATCACAATGGGAGGGATCACTATGGGAGAGATCACTACAGGAGAGATCACTACGGGAGAGATCAAAACGGGAGAGATCACTACAGAAGAGATCACAACAGGAGAGATTACAATGGGAGAGGTCACAACAGAAGG
10	3473329	3473330	431	AGAGGTGGATATAGTGGAGGTGGATCTAGTGGAGGTGGATCTAGTGGAGATGGATCTTGGGGTGGATCTCATGGGGATGGATCTAGTGGAGGTGGATCTAGTGGGGATGGGTCTCATGCAGGTGGATCTAGTGGAGGTGGATCTAGTGGAGGTGGATCTAGTGGAGGGGTATCTCGTGGAGGTGGATCTCGTGCAGGTGGATCTAGTGGAGGTGGATCTAGTGGAGGTGGATCTAGTGGAGGTGGGTCTCATGCG
10	3569025	3569026	316	TGGCCGGGCGCGGTGGCTCACGCCTGTAATCCAGCACTTTGGGAGGCCGAGATGGGCGGATCACGAGGTCAGGAGATCGAGACCATCCTGGCTAACACGGTGAAACCCCGTCTCTACTAAAAATACAAAAAAATTAGCCGGGCATGGTGGCGCACGCCTGTAGTCCCAGCTACACGGGAGGCTGAGGCAGGAGAATGGCGTGAAACCGGGAGGCGGAGCTTGCAGTGAGTCGAGATCGCGCCACTGCACTCCAGC
10	35956157	35956158	2018	GTGGTGATGACGGTGGTGGTGGTGATGATGGTGGTGGTGGTGGTGAAGATGGTGGTGGTGGTGGTGATGGTGGTGATGATGGTGGTGGTGGTGCTGATGATGGTGTTGGTGATGATGATGGTGGTGGTGGTGATGGTGGTGATGATGGTGGTGGTGGTGGTGATGATGATGGTGGTGGTGGTGATGGTGGTGATGGTGGTGGTGGTGATTGTGGTGATGGTGGTGGTGGTGGTGATGATGGTGGTGGTGGTGAAC
10	36467292	36467293	338	ATGATTAGACATTTCTTTTTTTTTTTTTTTTTTTTTTTTTTTTTTTTTTTTTTTTTTTTGAGACGGAGTCTCGCTCTGTCGCCCAGGCTGGAGTGCAGTGGCGGGATCTCGGCTCACTGCAAGCTCCGCCTCCCGGGTTCACGCCATTCTCCTGCCTCAGCCTCCCAAGTAGCTGGACTACAGGCGCCCGCCACCACGCCCGGCTAATTTTTTGTATTTTTAGTAGAGACGGGGTTTCACCGTTTTAGCCGGGAT
10	36593622	36593623	322	TGGATTTCTTTTTTTTTTTTTTTTTTTTTTTTTTGAGACGGGGTCTCGCTCTGTCGCCCAGGCCGGACTGCGGACTGCAGTGGCGCGCAATCTCGGCTCACTGCAAGCTCCGCTTCCCGGGTTCACGCCATTCTCCTGCCTCAGCCTCCGAGTAGCTGGGACTACAGGCGCCCGCCACCGCGCCCGGCTAATTTTTTGTATTTTTAGTAGAGACGGGGTTTCACCTTGTTAACCAGGATGGTCTCGATCTCCTGA
10	3690840	3690841	130	CATGCATGCATGCCATGCAGACACATGCACACACATACACACACCTCAATGTGCACACACACACACGCGCACACACATACCCATGTGTGCCCACCACACACATACCACGTGTGCCCACCACACACAGACAC
10	36946397	36946398	303	GGTATCGATCTCCTGACCTCGTGATCCGCCTGCCTTGGCCTCCCAAAGTGCTGGGATTACAGACATGAGCCACCGCGCCCGGCCTAAATGGATCTATTCTTTTTTTTAGACAGAGTCTTGCTCTGTCACCCAGGCTGGAGTGCAGTGGTGCCATCTCGGCTTACTGCTAGCTCCGCCTCCCGGGTTCATGCGATTCTCCTGCCTCAGCCTCCCGAGTAGCTGGGACTACAAGCGCCCGCCACCATGCCCGGCTAA
10	38310353	38310354	149	CAAGCAATCTGCCCGCCTCTGCTTCCCAAAGTGCTGGAATTAAAGGCATGAGACCACCGCACCTGGCCTTGTTGAGCACTATTCTACAATGTTGCTTCAGTCCTGTTGGCTGATGATGCTGTCCTGTTCTTCTGTATCTGCTAGTAATCA
10	39102052	39102053	936	TCTGTTCCATTCGAGTCCATTCCATCCATTCCATTTCATTCCATTCCATTCAATTTCATTGCTTTCTATTTGATGCCATTCCATTGGATTCTATTCCATTCCCCTCCATTCCAATCCATTCTGTTCCATCCGTTTCATTTCCATTATATTGCTTTCCATTCCATTCCTTTCCATTCCATTGGAGTCCATTTCACTCTAGTCCATTCCATTCGTGTCCATTCCATTCAAGTCCAATCCTTTCGAGTCCATTCCATT
10	393214	393215	97	CGATGTGTCTGGGTTGGGTGTGTGTGGGGTTTCCGGGAGAACTATGCGCGATGTGTCTGGGTTGGGTGAGTGTGGGGTTTCCGGGGAGAACTGTGCAC
10	42406542	42406543	88	AAGCAGTTTCTGAGATTGATTCTGTCTAGATTTTATACGAAGATATTTCCTTTTCTAACCATGTGGACTAAAAGCGCTTTGACTCTCTG
10	42406814	42406815	314	TTCTACAAAGAGAGTGTTCCATAACTGCTCTAATGAAAGAAAGGTGAAACTCTGTGAGTTGAATGCAGAGATCGCAACGTGCTTTCTGAGAAAGGTTCTGTCTAGTTTTTACATGAAGATATTAAGTTGTCTACCGTAGGCTTCAAAGCACTCTAAGTATGCACTTGGAAGTTCTACAAAAAGAGTGTCTGAGAACTGCTCTTTGGAAAGTAAGGTTCAACCCTGTGAGTTGAATGCACACATCACAAAGAAGTT
10	42418558	42418559	343	TCAAAAAGAGTTTCAACTCTGTGAGCTGAAAGTATACATAACAAAATTACCAAGGAAGCTTCTGTCTAGTTTTTATCTGAAGATATTTCCTATTTCACCATAGGCCATGAAGGGCTCAGAATTATCCATGTGCAAATTCTACAAAAAGACTGTTTCCAAACTGCTCAATCAATAGAAAGGTTCAACACTGTGAGATGAACGCACATATATCACAAATAAGTTTCTGAGAATGCTTCTGTCTAGTTTTTTTTGTGT
10	42494991	42494992	117	TTTGTCCATTCTGCTAATGGACATTTAGGAGCTCATTGAGGCCAATGGTGAAAAAGCAAATATTCCAGGATAAAAACCAGAAGAAAAGTATCTGGAAATCCGCTTTGTGATGGGTGAA
10	42658527	42658528	2632	GGGCCACGGATGATGATAATGGGGGTTAAACCTTGAGATACTGACTCAGTTTACAACCGCACTGTATAATAGAGCAAATCATTTGTTAATTTTTTTACAAATGGAATTTAATTTAATTAAGATGAATACAGTGTTTTAAACAAGGCTTGGTCATCTTAAAATAAAATAGTGGAATTAAGTGATAAAACCAATGTAAAAATCATAAACATTTTATAAAGAATTTTTGTCATGTAATTTAATATTTTTCTTTATTTA
10	43330077	43330078	190	ACTTGCCCTGCTCAGCCTGTATCGCACTTTACGAGCATACGAGTCAAGTGAACATACTAAACGTGAACGTCTCTACTAAAATAAAATTACGCATAATGCTGTAGTCCAGCTCTTGAGCTGAGCAGAAATCTGAACCGAGCAGCTTCATGCAATCATCACTCTGCGACAAGCGATCATCTCAAAAAAAAAAA
10	43677332	43677333	1438	GCTGAGGAGGATGTATGTCACCTCAGGACCCTGTGATGATTGCATTAACTGCACAAATTGTTTGTAGAGCATGTGTGTTTGAACAATATCAAACCTGGGCACCTTAAGAACAGGATAACAGCAATGTTCAGGGAACAAGGGAGATAACCTTAAACTCTGGCTGCCTGTGAGCCGGGCGGAACAGAGCCATATTTCTCTTCTTTCAAAAGCAAATAGGAGAAATATCACTGAATTCTTTTTCTCAGCAAGGAACGT
10	43706313	43706314	321	AGTTGGGGACAGGCTTGCACCCAGTAGCCCCTCTGACTCCTTGGAGCAGCAGCTCCTTGCAGGGAGTGGGGGACAGGCTTGCACCCAGTAGCCCCTCTGACTCCTTGGAGCAGCAGCCCCTTGCAGGGAGTGGGGGACAGGCTTGCACCCAGTAGCCCCTCTGACTCCTTGGAGCAGCAGCTCCTTGCAGGGAGTTGGGGACAGGCTTGCACCCAGTAGCCCCTCTGACTCCTTGGAGCAGCAGCCCCTTGCAGG
10	440409	440410	73	CCGTGTGCTGAACCGGAAGGACATTATGGCACACAGTGGGCACTATTCAGCCTTCAGGGAGGAGGGAAGCCTGC
10	48419953	48419954	303	TAAATTTTATCACGCCTGTAATCCCAGCACTTTGGGAGGCCGAGGCGGGCGGATCACGAGGTCAGGAGATCGAGACCATCCCGGCTAAAACGGTGAAACCCCGTCTCTACTAAAAATACAAAAAATTAGCCGGGCGTGGTGGCGGGCGCCTGTAGTCCCAGCTACTTGGAGGCTGAGGCAGGAGAATGGCGTGAACCCGGGAGGCGGAGCTTGCAGTGAGCCGAGATCCGCCACTGCACTCCAGCCTGGGCGACA
10	48878332	48878333	358	CGGCCTCTAAGAAGGACCCCAATGGACATTACCTCCTGGTATTCATGCACTGGTATAGTTGCCTCCCGCAGTGTACCAGGGTTCATCTATATGACCAGTAGAATATGCCAGTAGTGATGGTATGTCATTTCTAAGATGATACTATTTGGCACTCAAGGGTTAGCCTTCTGGGAAACATAGAGTTTGGGATTTGAAATTTAGAAACTGAAGCAACTTTTATTCTGGTAGTTACATGCTCTCATTACTGCTTCTCTC
10	50830087	50830088	66	AAGGGAGGGAAGAGGAAGGAGATGGAAGGAAGAGGGAAGGAGGGAGGGGAGGCAGAAGGGAGGGAGG
10	50950474	50950475	831	GGTGTATTTGGTGTGTGTGTGTGTATGGTGTGGGGTATGTGTGTGGCATGTTTGTGTGGTGTGTGTGGGTGTGGGTGTGTGATGTGTGTGTAGGTGTATTTGTGTGGTGTTTGGAGTGTGTGTGGAGTTTGGAGTGTGTGTGTGTGTGGGTGTGTGGTGTGTGTGGATGGGATGTGTATGTATGTGGTGTGTGTGTGGAGATATGTGTGATGTGTATGGTGTGTATGTGGTGTGTGTGTGGAGTGTATGTGTAGT
10	51367522	51367523	255	TGCTTCTGGCTTCCTAAGGTTTCCTTCCCAGCACACCACAGGACTGTGTCAGAGCTTTATCCCTCTTACTCCTGAAGTAAGCATAAAATTATGCTTTCCAGGTTTCCTAGGAATTTTAACTAGAAATAGTCACAGCAAGGCAAAAAGAGTGGCAATAAGAAGTGATGAAAAGATACAAGATCTAGAGTCAGATAGTCTTGGATTGAGATCTTTGTTCAGTCACTTACTAGTACCACCTTGGTCCAGTTGCTTCAC
10	51627234	51627235	255	TGCTTCTGGCTTCCTAAGGTTTCCTTCCCAGCACACCACAGGACTGTGTCAGAGCTTTATCCCTCTTACTCCTGAAGTAAGCATAAAATTATGCTTTCCAGGTTTCCTAGGAATTTTAACTAGAAATAGTCACAGCAAGGCAAAAAGAGTGGCAATAAGAAGTGATGAAAAGATACAAGATCTAGAGTCAGATAGTCTTGGATTGAGATCTTTGTTCAGTCACTTACTAGTACCACCTTGGTCCAGTTGCTTCAC
10	5202144	5202145	236	GATTGAAATTGGACACCCCAATGGACCTGGTTAAACCTGCTTCTTTGCACTTCTCCAGGGCCTGGGGAGGAAGGATATGGGTGATAGACCTTTAGTGTAAATTTTTCTTTTCAATTGGCGTTTGACTTTGTAAATGCTGGAAATCTGTTTTAACATATATAAATATTAGACTGAATTAAACAGTTTTATCACTTGAATATACAATTTCCTAATGCATTACCTTGCTATGCATATATG
10	523534	523535	62	CCACGCTCCTCGCCCCTGCCTCCCCCCATCCCACCTTCTCCCCCACCCCACCACCTCCCCGTG
10	52552242	52552243	54	GATATGTGTGTGTATATATATATATATATATATATATATATATATATATATATAT
10	53209407	53209408	397	GTGTCTAATATGTGAAAATTCAGAATATAAATATGATATGCTGGCTGGGCACGGTGGCTCACGCTTGTAATCCCAACACTTTGGGAGGTCGAGGTGGGCGGATCACTAGGCCAGGAGTTTGAGACCAGCCTGGCCAACACAGTGAAACCCCGTCTCTACTAAAAATACAAAAAATTAGCTGGGCATGGTGGCGGGTGCCTATAATACAAGCTACTCGGGAGGCTGAGCAGGAGAATCACTTGAACCCGGGAGGCA
10	54589554	54589555	181	CCTATTTTTTGACATTTTATTGTTTGAATTTATATTTTTTAATATATAGCCTGTCTTAAAATTTGTTGTAGTTATTATTTTTGATATATTTGTCTTTTAGTCTTCATACTAAAAATATGAGTGGTTTACACACCACAATTACAGCATTAGAGTATTCTTTTTGTTTTATTATACTTTAAGTT
10	54594162	54594163	102	ATATATATCATATATATTCATATATCATATCATATATATCATCATATATCATATCATATATATTCATATATATCATATATAGTCATATATATCATATATCATA
10	54594514	54594515	1324	TGATATCATATAATATATATCATATATATTATATCATATATATTATATATCATATATATTCATATATATCATATATATTCATATATATCGTATATATTCATATATATTCATATATATATCATATATTCATATATATCAAATCATATATATTCATATGTATTCATATATATCATATCATATATATTCATATGTATTCATATATATCATATATATATTCATATGTATTCATATATATCATATAGATTCATATGTATT
10	54805971	54805972	312	TAAATTCTTGAAAGTGGGCCGGGCGCGGTGGCTCACGCCTGTAATCCCAGCACTTTGGGAGGCCGAGGCGGGCGGATCACGAGGTCAGGAGATCGAGACCATCCTGGCTAACACGGTGAAACCCTGTCTCTACTAAAAATACAAAAAATTAGCCGGCGAGGTGGCGGGCGCCTGTAGTCCCAGCTACTCCGGAGGCTGAGGCAGGAGAATGGCGTGAACCCCAGGGGGCGGAGCCTGCAGTGAGCCGAGATTGCG
10	55983281	55983282	329	AACTTTTCCTTCTTTTTTTTTTTTTTTTTTTTTTTTTTTTTTTTTTTTTGAGACGGAGTCTCGCTCTGTCGCCCAGGCTGGAGTGCAGTGGCGGGATCTCGGCTCACTGCAAGCTCCGCCTCCCGGGTTCATGCCATTCTCCTGCCTCAGCCTCCCAAATAGCTGGGACTACAGGCGCCCGCCACTACGCCCGGCTAATTTTTTGTATTTTTAGTAGAGACGGGGTTTCACCGTTTTAGCCGGCATGGTCTCGAT
10	56140324	56140325	343	TGACCTGCCTATTTTTTTTTTTTTTTTTTTTTTTTTTTTTTTTTTTTTTTTGAGACGGAGTCTCGCTCTGTCGCCCAGGCCGGACTGCGGACTGCAGTGGCGCAATCTCGGCTCACTGCAAGCTCCGCTTCCCGGGTTCACGCCATTCTCCTGCCTCAGCCTCCCCAGTAGCTGGGACTACAGGCGCCCGCCACGCGCGCCCGGCTAATTTTTTGTATTTTTAGTAGTAGAGACGGGTTGTTCACCTTGTTAGCC
10	56762359	56762360	64	ACTAATCCTTTGTGATGTTAAGTTACAGGGCTTTGAGTCATCTATCTAAGAAAAGGCACTGACTC
10	5681688	5681689	65	GTCCATGAGTATCCGCAAAACTAAATAATAAGTGGGCGATGGTGCCCCCTGGGTGCGGGCAGCCTC
10	56902354	56902355	318	AGGCCGGGCGCGGTGGCTCACGCCTGTAATCCCAGCACTTTGGGAGGCCGAGGCGGGCGGATCACGAGTCAGGAGATCGAGACCATCCCGGCTAAAAACGGTGAAACCCCGTCTCTACTAAAAATACAACAAAAATTAGCCGGGCGTAGTGGCGGGCGCCTGTAGTCCCAGCTACTTGGGAGCTGAGGCAGGAGAATGGCGTGAACCCGGAGGCGGAGCTTGCAGTGACGGCCGAGATCCCCACGCACTGCATCC
10	569464	569465	255	GGTGGAAACGAGTGTGTGGGTCACGCAGAGTCCCTGCATCTTCACTCCAGGGTCCTTTGCATCCGGTAGAAACGAGTGTGCGGGTCACACAGAGTCCCTGCATCCTCACTCCAGGGTCCTTTGTGTCATGTGGAAACGAGCGTGTGGGTCATGCAGAGTCCCTGCATCCTCACTCCAGGGTCCTTTGCTCAGGTGGAAACGAGTGTGTGGGTCACGCAGAGTCCCTGCATCTTCACTCCAGGGTCCTTTGCATCC
10	57974627	57974628	315	TTTTTTGGCCGGGCCGGTGGCTCACGCCTGTAATCCCAGCACTTTGGGAGGCCGAGGCGGGCGGATCACGAGGTCAGGAGATCGAGACCAACCCCGCTAAAACGGTGAAACCCCGTCTCTACTAAAATAATAAAAAATTAGCCGGGCGTAGTGGCGGGCGCCTGTAGTCCAGCTACTTGGGAGGCTGAGGCAGGAGAATGGCGTGAACCCGGGAGGCGGAGCTTGCAGTGAGCCGAGATCCCGCCACTGCACTCC
10	58679634	58679635	190	TGCACATATATAAAAATTCTGATTTAGTTCCAAATATAGGATTATTTTCGGCATTTAGATTTCTTGTTTGCTTAGGTTCTTGATATCAGTGGACATCCCTGTAGTCATTATATTGTTTATTATGGAGTACTATAATTTAGTCAACTTTTTACTTTTCATTCTCAAAACTTTGTTGTTGTTGTTCTTTTTGA
10	58902201	58902202	331	TCTTTTTTTTTTTTTTTTTTTTTTGTTTTGTTTGTTTTGTTTTGTTTTTTGAGAGGGAGTCTCGTTCTGTCGCCCAGGCGGGAGTGCTGTGGCGCGATCTCCGCTCACTGCAAGCTCCGCCTTCTGGGTTCATTCCATTCTCCTGCCTCAGCCTCCCGAGTAGCTGGGACTACAGGCGCCCGCCACTGCGCCCGGCTAATTTTTTGTATTTTTAGTAGAGACGGGGTTTCACCGTGGTCTCGATCTCCTGACCTC
10	58941036	58941037	412	AATTCGCATTTCATGAAACTGTAAAAATTAAATTAAGTTCAAACTCTCCCAAGGTCATGAAGGCTGTAAACCCCATTGTGAATCATTTGATCTGGAAGAAGCCAGAGAATCAATTCCTGTGTTTGGCGTTCAGCCTCCCATGGGCACTTGGCTGTGCATGTTCTCCCACTCCCTTGTTGTCAGGACATGGCAGGAAGGCTCTTCCTTCCCAAGTCTGGCAGATGCCTTCCTGACAGCAATTGCTGCCTATCCAGT
10	62124859	62124860	285	TAGCATCTATTTTTTTTTTTTTTTTTTTGAGACGGAGTCTCGCTCTGTTGCCCAGGCCGGACTGCGGACTGCAGTGGCGCAATCTCGGCTCACTGCAAGCTCCGCTTCCCGGGTTCACGCCATTCTCCTGCCTCAGCCTCCCGAGTAGCTGGGACTACAGGCGCCCGCCACCGCGCCCGGCTAATTTTTTGTATTTTTAGTAGAGACGGGGTTTCACCTTGTTAGCCAGGATGGTCTCGATCTCCTGACCTCATG
10	62304780	62304781	117	TCTTGTAACAAACGCTTGTTTGTTACAAGTTACAAGGTTGATATATCAATATATATGATATGATATTAATATATCATATTAATATCATTAATAATATATTAATATATCAACCTTGTAA
10	66641113	66641114	422	AAGAAAAGTTTCTTTATATTAAAAGAACTATAGGTTTTCTGTATTTATACAATAAATACATATGTGAGTATGAGATATAAAAATGCTAAAATTGTGGGGAAAAGTAAAGAGTGTATGAATTTAATTATATACTTTTCTACTAAATTATTTTGAAAAATGCTTTATGGAATATCTAGCGTAAAATTAAATTTATAATACATTTAGTTGAATTTTTAGTAGCACCAAGTTTAGTGTTATAAAGGCAATCTCAAAGAA
10	6861370	6861371	85	CAACTTTCTGTTCTCCCTCCTGTGAGATTGGGTCACCCACTGTGATGGCACAAACAGGAGGCTGACCCGGGAAGGCATCGCCTCCT
10	68803686	68803687	1535	TTTTTTTTTTTTTTTTTTTTTTTTTTTTTTTTCCCTAGTGTTAAATATACTCAATATAAAGGAGTTTTTATTCTGAGATTTTCTTTGTTGTATTTGTTTTTTTTTTTTTTTTTTTTTTTTTTTTTTTTTTATTATACTCTAAGTTTCAGGGTACATGTGCACATTGTGCAGGTTAGTTACATATGTATACATGTGCCATGCTGGTGCGCTGCACCCACTAATGTGTCATCTAGCATTAGGTATATCTCCCAATGC
10	6936514	6936515	255	AGTTTCCAGCATACTGCATGGTATGGAGTAGCAGTTTCCAGCATACTGCATGGTATGGAGTAGCAGTTTCCAGCATACTGCATGGTATGGAGTAGCAGTTTCCAGCATACTGCATGGTATGGAGTAGCAGTTTCCAGCATACTGCATGGTATGGAGTAGCAGTTTCCAGCATACTGCATGGTATGGAGTAGCAGTTTCAAGCATACTGCATGGTATGGAGTAGCAGTTTCCAGCATACTGCATGGTATGGAGTAG
10	69585414	69585415	91	ATTAATGAAACTAACTTAGCTCCTGTTCGATAAATTAAATCTCAAGCAACTCAGCTGAATTCTGTCATAAGATTCATGGTAGAAACATATTT
10	702166	702167	385	AACATTATATATAGTATAGTGTACAATAGGACAAATAGTATAGCGTTATATAGGGTAGCATAGAAGAAACAGTGTAACATTATATAGTATAGTATACAATAGGACAAATAGTATAGCGTTATATAGGGTAGCATAGAATAGAAGAAACAGTGTAACATTATATAGTATAGTATACAATAGGACAAATAGTATAGCGTTATATAGGGTAGCATAGAATAGAAGGAAGTGTAACATTATATAGTATAGTATACAATA
10	70685902	70685903	601	GAGTTCAGTGGCGCCATCTCGGCTCACTGCAACCTCCGCCTCCTGGGTTCACGCCATTCTCCTGCCTCAGCCTCCCGAGTAGCTGAGACTACAAGTGCCCACCATCACGCCCAGCTAATTTTTTGTATTTTTAGTAGAGACGGGGTTTCACCATGTTAGCCAGGATGGTCTCGATCGCCTGACCTTGTGATCCGCCCGCCTTGGCCTCCCAAAGTGCTGGGATTACAGCATGAGCCACAGCTCCTGGTGAACCTG
10	70973334	70973335	1668	TTTTTTTTTTTTTTTTTTTTTTTTTTATGGTACATTATCTCTCTTTATTTACATATTTTCTTTTTTTCTTTCTTTTTTTTTTTTTTTTTTTTTTTTGCACCGCCCTTAATCCATTTGATCCTGAGTGGACACAGCACATGTTTCAGAGAGCACAGGGTTGGGGTAAGGTCACAGATCAACAGGATCCCAAGAGAGAGGAATTTTTCTTAGTGCAGAACAAAATGAAAAGTCTCCCATGTCTACTTCTTTCTACAC
10	71544371	71544372	1627	TCACATACCATGCTGGTTCAGAAACCACCATGATACTTCAAGATATGTAATTCTTTTTTTTTATAGACTTTATTTTTTTATTTTTTTATTTTTATTATTATACTTTAAGTTTTAGGGTACATGTCCACAACGTGCAGGTTTGGTACATATGTATATATGTGCCATGTTGGTGTGCTGCACCCATTAACTCGTCATTTACATTAGGTATGCCTCCAATGCTATCCCTCCCCATCCCCCCACCCCACAATAGGCCTC
10	71610165	71610166	311	CTCTTTTTTTTTTTTTTTTTTTGAGACGGAGTCTCGCTCTGTCGCCCAGGCTGGAGTGCAGTGGCGGGATCTCGGCTCACTGCAAGCTCCGCCTCCCGGGTTCATGCCATTCTCCTGCCTCAGCCTCCCAAGTAGCTGGGACTACAGGCGCCCCGCCACTACGCCCGGCTAATTTTTTGTATTTTTAGTAGAGACGGGGTTTCACCGTTTTAGCCGGGATGGTCTCGATCTCCTGACCTCGTGATCCGCCCGCCT
10	72127726	72127727	88	TATGTTATGTTATTGTTATGTTATGTTATGTTATGTTATGTTATGTTATGTTATGTTATGTTATGTTTTATGTTATGTTATGTTATGTT
10	72336937	72336938	57	AGAGAAAAGAAAGAGGAGGAAGGAAGGAAGGAAGGAAGGAAGGAAGGAAGGAAGGAAG
10	73180234	73180235	338	TTGATGTGATGGTGATGGTGATGATGATGGTGATAGGTGATGATGATGATGATAGTGATGATGATGGTAATGGTGATGTGTGATGATGATGATGGTGATGGTAAATGGTGATGATGATGATGATGATGGTGATGGTAATGGTGATGGTGATGATGAATGATGATGTGATGATGATGGTGATATGATGATGGTGATGATGATGGTGATGGGATGATGATGATGATGATGTGATGGTAATGGGTGATGATGAATGAT
10	73448735	73448736	762	TGGTGGAGCGCAGGGGTAGAGGAGTCAGGGATGGTGGAGTCAAGTGCCGTGGACCCAGGGATGGTGGAGCCAGGGGTGGTGGAGTCAGGGATGGTGGAGTCAGGGATGGTGGAGCCAGAGGTGGTGGAGCCAGGGATGGTGGAGCCAGGGGTGGTGGAGCCAGGGGTGGTGGAGCCAACGGTGGTGGAGTCAGGGATGGTGGAGTCAGGGATGGTGGAGCCAGAGGTGGTGGAGCCAGGGATGGTGGAGCCAGGG
10	74182692	74182693	329	TCCTGACCTCAAGTGATCCACCTGCCTTGGCCTCCCAAAATGTTGGGATTACAGGTGTGAGCCACTGCACCCGGCTTCTTTAGGTATTCTCTAACCATTTCTTCTAGATTTGCTTCCTGAGCTGCTTAAATGTTTGTGTCCCACTGGATTCTGTCCTTGCCCATAGTTCTTTTCTGTAAAATACCCTCCTTGGGTAATCTCATCTGTTCTTATGGTGTAATTCTAACGTGTGTTGATGATTCCCAAATCTATCTC
10	7420341	7420342	100	AGTGTGGGTGTGTGTGGGTGTATGTGTGGATGGGTGGATGGATGGGTGTGAGTGTGGGTGTGTGTGGGTGTATGTGTGGATGGGTGATGGATGGGTGTGAG
10	7568648	7568649	934	GAGGATGTATATATTGTGTGAGGTGAAGTATATATTGTGGAGGGTATATACATTGTGGAGGGTGTATGCATTGTGGAGACATGTATATATTTTGTGTGGGATGTATATATTGTGTGGAAGGGGATGTATATATTGTGTGGAAGGGGATGTATATATTGTGTGGGATGTACATATTGTGGAGGGTGTATATATTCTCGGGGGTGTATATATTATGGGAGAATGTATTTATTGTGTGGAGGGGGTGTATATATTGTG
10	76230339	76230340	143	AATGGCCAACAGGTATATGAAAAGATGCTCAACATCACTAATCATTAGGGAAATGAAAATCAAATCCACAATGAGATATTGCATACTCATTAGGATGACCACTATTAAAAAAAAAAAACCGAAAAATAACAAGTGCTAGTGAGG
10	76579099	76579100	2056	AGCCACTGTGCCCAGCCTCTTATTCTGTTTTCAGTACAGAAGGAAAACACACAGCTCAGAGGGCCAGTGGCAAAGGAATGTGGAACGGAGTGCCAAATTAAGAGTAGGACACTCAGATTTATTTTTATCCATCTCTGTAACCAACTAATGCGTGTAAGCCTTGAGCAAATCACTGAGTGGCCTTGTCTTAAAGTTGGGTTTTCTACAAAGCAGGAAGCCCTATGCAGACAGCTATATCCTCAGAGCCTGGTACAG
10	769149	769150	78	TGACAGGGATACAGTACGTGTCAGGGGTTTCACTGTGTGGGAAAAGGTCACACCATCATCACCATGCCCGGCGTCACGT
10	78516989	78516990	70	GTATATATGTGTATATATATACACATATATGTGTGTATTATATACACATATATGTGTGTATATATTACACA
10	79279969	79279970	342	ACCTCACACTGCACACCCTCACACTGCATACCCGGGACCTCACACTGCACACCCTCACACCACATAACACCCAGACCTCACACTGCACATCCTCACACTGCACACCCCAGACCTCACACTGCATACCCTCACACCACATACCCCAGACCGCACACTGCACACCCTCACACTGCATACCTCAGACCTCACACTGCACACCCTCACACCACACACCCCAGACCTCACACTGCACACCCTCACACTGTATACCCCAGA
10	812244	812245	80	ATGTGCATATACTCATAGTATCCCCACTTGATCATTACACGTGTGCATATACTCATAGTATCCCCACTTGATCATTACATG
10	81294573	81294574	156	AGAAAGAGGAAGAAGAAGAAGGAGAAGGAGAAGGAGAAGGAGAAGGAGAAGAAGAAGAAAAGAAGAAAAGAAGAAGAAGAAGAAGAAGAAGGAGAAGGAGAAGGAGAAGGAGAAGGAGAAGAAAAGAAAAGAAGAAGAAGAAAGAAGAAGAAGAAGA
10	84978912	84978913	5060	CAAGCAACTGAGGGGATTCTTAGGCATTACAGGATTCTGCAGATTATGGATACCTGGGTATGGTGAAATAGCTTGTCCCTTAAATCACCTAATAAAGGAGACTCAGGAAGCTAAAACTTACTCTCTAATTTGGGAACCTGAGGCTAGAAAGGCCTTTGACCAACTAAAAGAAGCCTTGCTTAAGGCACCAACCCTTAGTCTTTCCATAGGGAAGACGTTTAACCTTTATGTGTCAGAAAGGAGGGGAATGGCCCT
10	85917673	85917674	335	CTTGGCCGGGCGCGGTGGCTCACGCCTGTAATCCAGCACTTTGGGAGCCGAGCGGGCGGATCACGAGGTCAGGAGATCGAGACCAATCCCGGCTAAAACGGTGAAACCCCGTCTCTACTAAAAATACAAAAAAATTAGCCGGGCGTAGTGGCGGGCGCCTGTAGTCCCAGCTACTTGGGAGGCTGAGGCAGGAGAATGGCGTGAACCCGGGAGGCGGAGCTTGCAGTGAGCCGAGATCCCGCCACTGCACTCCAG
10	86228507	86228508	316	GTTATAGGTTTTCTCTTTCTTTTTTTTTTTTTTTTTTTTTTTTTTTTTTTTTTTATTTTTATTTTTATTGATCATTCTTGGGTGTTCTCCGCAGAGGGGGATTTGGCAGGGTCATAGGACAATAGTGGAGGGAAGGTCAGCAGATAAACAAGTGAACAAAGGTCTCTGGTTTTCCTAGGGCAGAGGACCCTGCGGCCTTCCGCAGTGTTTGTGTCCCTGGGTACTTAAGATTAGGGAGTGGTGATGACTCTTAAC
10	86361707	86361708	497	TGTGTGGTGTGTGTGTAGTATATGTATGTGATGTACTGTGTGTGTAATGTGTGATATGGATGGTGTGTGTGGTGTGTGTGTGATATAGTGTGTTTGGTATGTGTGATATGGGTGGTGTGTGTGTGTGGTATGAGCGAGGTGTAATGTATTGTGATACATGTTTGTGTGTGTGATGGGTGGTATGGGTGGTGTGGTTTGTGTGTGGTGTGTATGTGAATGGGATGTGTGTATGATATGTGTATGGTATGTAGTATA
10	87833776	87833777	60	GTGGTGTGGTTTTCCAGGACTGGAGGACGATGGTGGTTTGGTGAGGAATGGATGTACGGGT
10	87963306	87963307	306	ACTCACGCCTGTAATCCCAGCACTTTTGGAGCGAGGGCGGGTGGATCACGAGGTCAGGAGATCGAGACCATCCTGGCTAACAAGGTGAAACCCCGTCTCTACTAAAAATACACAAAAAAATTAGCCGGGCGTGGTGGCGGGCGCTGTAGTCCCAGCTACTCGGGAGGCTGAGGCAGGAGAATGGCGTGAACCCGGGAGGCGGAGCTTGCAGTGAGCCGAGATCGCGCCACTGCACTCCAGCCTGGGCGACAGAGC
10	88229008	88229009	62	AGTAGAGTGTGCTGTGATTTAACTACCTGATCTGAGTGATTTTGAGACATTTTATTAATGATT
10	88284471	88284472	93	CTGAAATCATGGATCAGAGCCAAGTTTGTAGTACCCTTAGGAGGGGCCTCTGCCCTCCTGTGTGCTGCCTGGGTGAGGACAGAACCCCCTAACC
10	89373678	89373679	332	TATCGCCGGGCGCGGTGGCTCACGCCTGTAATCCCAGCACTTTGGGAGGCCGAGGCGGGTGGATCATGAGGTCAGGAGATCGAGACCATCCTGGCTAACAAGGTGAAACCCCGTCTCTACTAAAAAATACAAAAAATTAGCCGGGCGCGGTGGCGGGCGCCTGTGGTCCCAGCTACTCGGGAGCTGAGGCAGGAGAATGGCGTGAACCCGGGAAAGCGGAGCTTGCAAGTGAGCCGAGATTGCGCCACTGCAGTC
10	89894310	89894311	173	TAATGATGATGGTGATGGTGATGGTGATAGTAGTGTTAGCGGTGGTTATAATGATGGCCTTTGTGGTGGTGGTGGTGAGGTGGTCATAATGATGATGGTGATGGTGATGGTGATAGTAGTGGTAGCGGTGGTTATAATGATGGCCTTTGTGGTGGTGGTGGTGAGGTGGTCATA
10	91847176	91847177	56	CTCAGTTTCTCTCTCCATACGTCCATGACCTCTGAGAGGACTCAAAATGCCAGATGA
10	92215065	92215066	309	ATTTTTTTTTTTTTTTTTTTTGAGACGGAGTCTCGCTCTGTCGCCCAGGCTGGAGTGCAGTGGCGGGCGATCTCGGCTCACTGCAAGCTCCGCCTCCCGGGTTCACGCCATTCTCCTGCCTCAGCTCCCAAGTAGCTGGGACTACAGGCGCCGCCACTACGCCCCGGCTAATTTTTTGTATTTTTAGTAGAGACGGGTTTCACCGTTTTAGCCGGGATGGTCTCGATCTCCTGACCTCGTGATCCGCCCGCCTCG
10	92227507	92227508	322	TTTTTTTTTTTTTTTTTTTTTTTTTTTTTTGAGACGGAGTCTCGCTCTGTCGCCCAGGCTGGAGTGCAGTGGCGCAATCTCGGCTCACTGCAAGCTCCGCCTCCCGGGTTCACGCCATTCTCCCTGCCTCAGCCTCCCAAGTAGCTGGGACTACAGGCGCCCGCCACTACGCCCGGCTAATTTTTTGTATTTTTAGTAGAGACGGGGTTTCACCGTTTTAGCCGGGATGGTCTCGATCTCCTGACCTCGTGATCC
10	92404067	92404068	107	TCTGTGTTCTTGCCTTCCCTTCCTCCTGATTCATTCCTAAAAACTGCAGCTCAGGCAATGCCTCTCTCATAAAGCCTTGTTTTACCACCCACAACAACAGTGTTAATC
10	9406732	9406733	2241	ATATATACACACATACACGCACACACACACACATATATGTATACACATATGTATATACACACACATATATATACACACATATGTATACATATATATGTATACCTGATATATGTGTGTGTGTGTGTGTGTATATATATATGAAGATTGTCTACTGCTAATTCAACAGGCTAATTTGAAAGGGTTTTCCACCAGACTTCTCCAGGTTAGTATGGGAGAAAGAAAGCCTGATCAATACTTATAGAAGAAAAGTTCCTG
10	9474854	9474855	317	TTTTTTTTTTTTTTTTTTTTTTTTTGAGACGGAGTCTCGCTCTTGTCGCCCAGGCTGGAGTGCAGTGGCGGGATCTCGGCTCACTGCAAGCTCCGCCTCCCGGGGTTCACGCCATTCTCCTGCCTCAGCCTCCCAAGTAGCTGGGACTACAGGCGCCCGCCACTACGCCCGGCTAATTTTTTGTATTTTTAGTAGAGACGGGGTTTCACCGTTTTAGCCGGGATGGTCTCGATCTCCTGACTCTCGTGATCCGCC
10	9510995	9510996	315	TTTTTTTTTTTTTTTTTTGAGACGGAGTCTCGCTCTGTCGCCCAGGCTGGAGTGCAGTGGCGGGATCTCGGCTCACTGCAAGCTCTGCCTCCGGGTTCACGCCATTCTCCTGCCTCAGCCTCCCAAGTAGCTGGGACTACCAGGCGCCCGCCACTACGCCGCGCTAATTTTTTTGTATTTTTAGTAGAGAGACGGGTTTCACCGTTTTAGCCGGGATGGTCTCGATCTCCTGACCTCGTGATCCGCCCGCCTCGG
10	9514049	9514050	152	ACATATTTTAATTTCGTGAAGTTAAAATGTGTCTTAAAAGAACGTAGACTAACAGATCCAGTCTATCCTTGCATTTCCATATTTTAATTTCGTGAAGTTAAAGTGTGTCTTAAAGGAACGTAGACTAACAGATCCAGTCTATCCTTGCATTTC
10	97746116	97746117	248	CACCCCTGATAATTCAACATGGGTTCTTTTCTATTTCCCTAAGTGTTGGCCAGTCTGAGAAATAAAGGGAAAGAGTACAAAAGAGAGAAATTTTAAAACTGGGTGTTTGGGGGAGACATCACATGTCAGCAGGTTCCGTGATGCCCAGCTTTAAAGTTTCTCTCTTTTGTACTCTTTCCCTTTATTTCTCAGACCAGCCAACGCTTAGGGAAATAGAAAAGAGCCCACGTTGAATTATCAGGGGAACCC
10	98175488	98175489	638	GAGACAGAGAGAGAGAGACAGAGAGAGAGACAGAGAGAGCAGAGAGAGAGAGAGAGACGAGAGAGAGAGAGACAGAGAGAGAGACAGAGAGAGAGAGAGAGAGACAGAGACAGGAGAGAGAGAGAGAAAGAGACAGAGAGAGAGAAAGAGACAGAGAGAGAGAGAGAGAGAGAGAAAGAGACAGAGAGAGAGAGAGAGAAAGAGACAGAGAGAGACAGAGAGAGAGAGAAAGAGACAGAGAGAGAGAGAAAGAGA
10	98198950	98198951	1169	CAGGTTCATGCCATTCTCCTGCCTCAGCCTCCCACATAGCTGGGACTACAGGCACCTGCCACCACGCCTGGCTAATTTTTTGTATTTTTAGTAGAGATGGGGTTTCACCATGTTAGCCAGGATGGTCTCGATCTCCTGACCTTGTGATCTGCCTGCCTCGGCCCCCCAAAGTGCTGGGATTACAGGAGTGGGCCACCACGCCCAGCCTTAGGGGTGTCTCTTACAAGCGGCAAACAGCTAGATTTTTTTTCTTGT
10	9896386	9896387	109	TGATTTTTTTTGCAGTAAAACTTTCCTATGTTTCATCGTCTTTTGGATACAAAACAGGTTATATTGCCAGTAAAAACTAAAATTTCTGAGATATGAAATCTGTAACTCAA
10	99478668	99478669	73	AGGAAGATTTCAAAACTCACCTGGAACATTCCTCCTCCCTGTGCCCTGGGCGTGACATCTGCAGCCAGGAAACA
10	99804136	99804137	106	CAACAGCAGCAGCAAAACAGCGACAGCAGCAGCGACAGCAGCAACAACAGCAGCAACAACAGCAGCAATAGCAGCAACAACAGCAGCGACAACAGCAGCAAAACAGC
11	100650230	100650231	96	ATACGTATGTATACGTATATATATACGTATGTATACGTATATATATATACGTATATATACGTATGTATACGTATATATATACGTGTATATATGTGTG
11	100781384	100781385	325	TAAGACTTGGCGGCCGGCGCGGGTGGCTCACGCCTGTAATCCCAGCACTTTGGGAGGCCGAGGCGGGTGATCATGAGGTCAGGAGATCGAGACCATCCTGGCTAACAAGGTGAAACCCCGTCTCTACTAAAAATACAAAAAATTAGCCGGGCGCGGTGGCGGGCGCCTGTAGTCCCAGCTACTCGGGAGGCTGAGGCAGGAGAATGGCGTGAACCCGGGAAGCGGAGCTTGCAGTGAGCCGAGATTGCGCCACTG
11	101048720	101048721	158	ATCTTCCATTTATGTTCTATTATCTTCTGTATTTCTTCTCATATTTATTAACCTCTGTGATCTCATCACCTACTTCTTTATCTTCCATTTATGTTCTATTATCTTCTGTATTTCTTCTCATATTTATTAACCTCTGTGATCTCATCACCTACTTCTTTA
11	101429127	101429128	90	ACATGTATACATATATACATGTATACCCATATACATGTCTACATATATACATGTATACCCATATACATGTCTACATATATACATGTATACC
11	101796444	101796445	815	AGCCAAGATCGCGCCACTGCACTCCAGCCTGGGCAACAGAGCGAGACAAAAAAAAAAGAGAGAGAGAGGAGGGAGGGGAGGGAGGGAGGGAGGAAGGGGCGGGCAATAATGTGATTAATGCAACTTCTTAAGGCAAAGAAATTGAAATAAATTTTAAGAAGAGCTCAACGGGAACATTCAGATCGTTATAAAACACTATAATATAGGCACATAAAAGCTCAGATGAAGAGACAAAATTCTATGTAGTTAACTGGC
11	1018073	1018074	7288	GTGTGTGGTGAAGGGTGTGGTTAGCCTGCTGCTGGTGGCTGAGGTGGTGTGGGCCACAGGGGTGCCGGTTCCTGGACTGGTGGGATTGGGGGTGATGGCGGTAGAAGTTGGGGTGACTTCAGGAAGGTGTGTGGAGGAAGTTTGTGAATGTAGGGATGTAGAGGTTTTGGCTGTGTTGAATGAGCTCAGGGCTTGGCTCGTCCCGCTGGTGGTCGGCGTCATTGTTGGCGCTGTGTGGGTGGACCCTGTGGCCTT
11	102602082	102602083	1096	CACCACACACCTGTTCCTCCTCACACTACACACCCACTCCTCATGGGACACACCACTCCTCACACCACACACCCTCCTCACACTGCACACCCATCCTCACACCACGCACCCACTCCTCACACCACACACCCACTCCTCACACCGCACACCTGCTCCTCTTCACACCACACACCCACTCCTCACACCACACACCCGCTCATCCTCACACCACACACCTGATCCTCCTCACACCACACACCCACTCCTCACACCACA
11	102896261	102896262	69	ATACATGTATTATACACGTATATATACGTGTATATATGTATACATATACGTATATATACGTGTATATATG
11	103201267	103201268	326	AACAATAAATTTTTTTTTTTTTTTTTTTTTTTTTTTTTTGAGACGGAGTCTCGCTCTGTCGCCCAGGCCAGACTGCGGACTGCAGTGGCGCAATCTCGGCTCACTGCAAGCTCCGCTTCCCGGGTTCACGCCATTCTCCTGCCTCAGCCTCCCGAGTAGCTGGGACTACAGGCGCCCGCCACCGCGCCCGGCTAATTTTTGTATTTTTAGTAGAGACGGGGTTTCACCTTATTAGCCAGGATGGTCTCGATCTCC
11	105395086	105395087	197	CTCATTAATCCAAGTTATGCTAATCCATTTACTTAGTCTGTGCAAATACCCCCAGGGAAAGAATTTCTAAATGCAGGGTTTATTCTCAGAATTTCAGAACTTCTCCCTTGACCTAATTTACTATTTTACTAGTACTCTGCCTTTGAGATAATTTTTTAATGTGTTTTGTCCTGCTGTGTTAGCTTTCTTCAGTGGTAC
11	105836052	105836053	329	TTTGTGTTAATTCTTTTTTTTTTTTTTTTTTTTTTTTTTTTTTTGAGACGGAGTCTCGCTCTGTCGCCCAGGTCGGACTGCGGACTGCAGTAGCGCAATCTCGGCTCACTGCAAGCTCCACTTCCTGGGTTCACGCCATTCTCCTGCCTCAGCCTCCCGAGTAGCTGGGACTACAGGCGCCCGCCACCGCGCCCGGCTAATTTTTGTATTTTTAGTAGAGACGGGGTTTCACCTTGTTAGCCAGGATGGTCTCGA
11	106044579	106044580	315	TGAGGCCGGGCGCGGTGGCTCACGCCTGTAATCCCAGCACTTTGGAGGGCCGAGGCGGGGCGGATCACGAGGTCAGGAGATCGAGACCATCCCGGCCTAAACGGTGAAACCCCGTCTCTACTAAAATACAAAAAATTAGCCGGGCGTAGTGGCGGACGCCTGTAGCCCCAGCTACTTGGGAGGCTGAGGCAAGGAGAATGGCGTGAACCCGGGAGGCGGAGCTTGCAGTGAGCCGAGATCCCGCCACTGCACTCC
11	106170469	106170470	335	TCTTTTTTTTTTTTTTTTTTTTTTTTTTTTTTTTTTTTTTTTTTGAGACGGAGTCTCGCTCTGTCGCCAGGCTGGAGTGCAGTGGCGGGATCTCGGCTCACTGCAAGCTCCGCCTCCCGGGTTCACGCCATTCTCCTGCCTCAGCCTCCCAAGTAGCTGGGACTACAGGCGCCCGCCACTACGCCCGGCTAATTTTTTGTATTTTTAGTAGAGACGGGGTTTCACCGTTTTAGCCGGGATGGTCTCGATCTCCTG
11	106313957	106313958	145	TAAAATTTTCTTATTTTTTTCTCAACTTTTAATCAAATTAGAAATACTTTTCCCTCAACCACACTTAGGTTAAAAAGGATTCTTATTCATTAAAAGTTGAGAAAAAAAATAAGAAAATTTTATAAATTCTACCTTGTAGAAATAAA
11	106658314	106658315	283	GGAAGGGAGGGTGAGGGAAGGGGAGGAGGGAAGGGGGGGAGGGGGAGGAGGGAAGGGAGGAAGGGGGAGGGGGAGGAGGGAGGGGGGGGGGGGGAAGGGAAGGGAGGGAAGGGAAGGGTGGGAGGGAGGGGGGAGCGGAAGGGAGGGTCAGAGGGGAGGGGGAGGGGAGGGGGAGGGAAGAGGAGGAGAGGAGGGAAAGAGGAGGGGAAGGGAAGGGTGAGGAAGGGAAGGGAGGGGAGGGGGGGGTGGGGAAAA
11	106839503	106839504	100	TAGACCATAACATTGGTGCATAACAGTGTCTAAGCTGCCCACAAAGGCTAAAATAAAATTCATTTATAACACAGTGGAAAATTCTGAAAAGTACTTCCAAA
11	1070538	1070539	192	GTGTGGGTGGATGGATGGGAGGAAGGGAGGGGGAATGAATGGGTCAGCAGGTGGATGGATGGATGGATGGATAGATGGGAGGAAGGGAGGGGAAATGAATGGGTCAGTGGGTAGATGGATGGGATGGATGGATGGATGGATGGATGGGAAGCAGGGAGGGGAAATGAATGGGTCAGTGGGTAGATGGATGGGA
11	10733381	10733382	329	TCAGTAAATGTTTCTTTTTTTTTTTTTTTTTTTTTTTTTTTTTTTTTTTTTGAGACGGAGTCTCGCTCTGTCGCCCAGGCTGGAGTGCAGTGGCGGGATCTCGGCTCACTGCAAGCTCCGCCTCCCGGGTTCACGCCATTCTCCTGCCTCAGCCTCCCAAGTAGCTGGACTACAGGCGCCCGCCACTACGCCCGGCTAATTTTTTTGTATTTTTAGTAGAGACGGGGTTTCACCGTTTTAGCCGGATGGCCTCGA
11	107984085	107984086	541	TTTTTTTTTTTTTTTTTTTTTTTTTTTTGAGATGGAGTCTTGCTCTGTCACCCAGGCTGGAGTGCAGTGGCGCTATCTCAGCTCACTGCAAGCTCCGCCTCCCAGGTTCACGACATTCTCCTGCCTCAGCCTCCCCAGCAGCTGGGACTACAGGGGCATGCCACCACACCCAGCTAATTTTTTTGTATTTTTAGTAGAGATGGGGTTTTCACCGTGTTAGCCAGGATGGTCTTGATCTCCTGACCTTGTGATCCA
11	10823583	10823584	77	TGAGTGTTTAGGCAACAAAATGTTAAATTATGCAATATATGTGATTTCATTTGCTATTAAAACATGAAACTATTTTAG
11	109057030	109057031	83	TATAGAGTGTGTACGTATTTGTGTATGATCAAAAATGTTGAATTTTTTTCCTTTTAATAATAATACCAATTTTTTAAAAATTAT
11	1092800	1092801	3552	ATGGTGTCAGGGTTGGGGTCTGTGTGCCGGTGGGTGTTGCTGTTGGGGTCACCGTAGTGGTGGTGCTGATGGGTGTCGATGTTGGGGTCTGTGTGCCAGTGGGTGTAGGGGTTGGGGTCACCGTAGTGGTGGTGGTGATGGGTGTCGATGTTGGGGTCTGTGTGCCGGTGGGTGTTGGGGTTGGGATCACGGTGGTGGTGGTGCTGATGGGTGTCTGTCGTTGTTGGGTCTGTGTGCCGGTGGGTGTTGGGGTTG
11	1093162	1093163	1781	CCGTGGTGGTGGTGGTGATGGGTGTCGTGGTTGGGGTCTGTGTGCCGGTGGGTGTTGGGGTTGGGGTCACCGTAGTGGTGGTGGTGATGGGTGTCGATGTTGGGGTCTGTGTGCCGGTGGGTGTTGGGGTTGGGGTCACCGTGGTGGTGGTGCTGATGGGTGTCGTTGTTGGGGTCTGTGTGCCGGTGGTGTTGGGTTGGGGTCACCGTGGTGGTGGTGTGGTGATGGGTGTCGTGGTTGGGGTCTGTGTGCCGG
11	111499181	111499182	63	ACAAAGAAAAGAAAGAAAAGAAAGAAAGAAAGAAAGAAAGAAAGAAAGAAAAGAAAAAAAAAGA
11	1148519	1148520	301	CATTCACTCATTCATTCACCCATTCACTCACTCACTTATTCACTCACTCTCTCACTCATTCATTAATTCGCCCATTCACTCCACACTTTCACTCACTCACTTATTCACTCATACACTCATTCACTTATTTACTCACTCATTCACTCACTCATTAATTCACCCATTCACTCACTCACTTATTCATCTCATAGACTCATACACTCACTCATTCACTCACGCATCCACTCATTCACTCACTCATTTACCCACTCACTC
11	115199433	115199434	182	CGCGTATATATATGTATATACATATATATACGCGTATATATATGTATATACATATATATACGCGTATATATATGTATATACATATATATACGCGTATATATATGTATATACATATATATACGCGTATATATGTATATACATATATATACGCGTATATATGTATATACATATATATACGCGTAT
11	11581698	11581699	268	ATGATGGGATAGGATGGAATAGAATGAGATACGATGGGATGGGTGGAATAAAATGAGATATGAAGGGATGGGATGGAATAGAATGAGGTATGATGGGATGGGGTGGAACAGAATGGGATATGATGGGATGGGGTGGAATAGAATGAGATATGGTGGGATGGGTGGAATAGAATGGGATATGATGGGATGGCGTGGAATAGAATGAGATATGATGGGATGAGGTGGAATAGAAAGAGATATGATGGGATGGGGTGG
11	117131491	117131492	1447	TCTCCGAGTAGCTGGGGTTGCAGGCATGCGCCACCAAGCCCGGCTAATTTTGTATTTTTAGTAGAGACGGGGTTTCTCCATGTTGGTCAGGCTGGTCTCGAACTCCGACCTCAGGTGATCCACCTGCCTCGGCCTCCCAAAGTGCTGGGATTACAGGCATGAGCCACTGCGCCCAGCCGATCTCTATTTCTTTATTAAATTTTTTTTGCTAAATAATTTATATAAATAAAAAATTCAGGCCTGGTGCGGTGGCTC
11	11807844	11807845	52	TGTCCAAATTTCTCCTCCTTTTTTTTTTTTTTTTTGAGACGGAGTCTCGCTCT
11	118226570	118226571	175	CATATGTGTGTGTATGCGTATACACACACATATGTGTGTGTATGCGTATACACACACATATGTGTGTGTATGCGTATACACACACATATGTGTGTGTATGCGTATACACACACATATGTGTGTGTATGCGTATACACACACATATGTGTGTGTATGTCGTATACACACATATATAT
11	118292471	118292472	1707	AGTGCAATGGGACAGTCTCTGCTCACTGCAACCTCCGCCTCCCAGGTTCAAGCGATTTTCCTGCCTCAGCCTCCCAAGTAGCTGGGATTACAGGCATTGCGCCACCACGCCGGGCTAATTTTTGTATTTTTAGTAGAGACAGGGTTTCATCGTGTTGGCCAGGCTGGTCTCGAACTCCGGAACTCAAGCGATCCACCTGCCTTGGCCTCCCAATAGTGCTGGAATTACAGGCGTGAGCCACGGAGCCGGGCCTAG
11	118292677	118292678	1339	TTTTTTTTTTGAGATGGAGTCTCACTCTGTCGCCCAGGCTGGAGTGCAGTGGCACGATCTCGGCTCACTGCAACTTCCACCTCCTGGGTTCAAGCGATTCCACAGGTGACCGCCACCTTGCCCAGCTAATTTTTGTGTATTTTTAGTAGAGACAGGTTTTGCCATCTTGGCCAGGCTGATCTTGAACTCCTGACCTCAGGTGATCTGCCAACCTTGGCCTCCCAAAGTGCTGGGATTACAGGCATGAGCCACCAT
11	118553702	118553703	501	GCCAAGGTGGGTGGATTGCCTGAGCTCAGGAGTTCAAGACCACCCTGGGTAACATGATGAAACCTCGTCTCTACTAAAATACAAAAAATTAGCCTGGTGTGATGGCAGGCTAATAAGTAAGTAAGCCCTTACTAATAAGTAAGCCCAGCTACTCAGGAGGCAGAGGTCGCAGTGAGCTGAGTGACCAAAAGTTGGTCCTATGAAAAGATCAATAAAATTGACAGAGAAGACACACATAAAATCAGAATGAGTGCA
11	118678172	118678173	1133	TTTTTTTTTTGAGATGGAGTTTCGCTCTTGTTGCCCAAGCTGGAGTGCAATGGCACAATCTTGGCTCACTGCAACCTCTGCCTCCTGGGTTCAAGCGATTCTTCTGCCTCAGCCTCCTGAGTAGCTGCTGGATTACAGGCATGCACCACCACACCTGGCTAATTTTTTTGTATTTAGTACAGACGGGGTTTCACCATGTTGGCCAGGCTGGTCTCAAACTCCTCACCTCAGGTGATCCACCCGCCTCAGCCTCCC
11	118818714	118818715	142	CCTGCTTTATGTCTTACCTGCTGCCAATTCCAGTCAATCTTTCCCTAAAATCACTGCAGTCTGTCTGCTTCTCTCCACTCCCATGTTCATTGCTTGGCCATGAACTTTTTCACCTGGATCATTTTGTTTCTCACTTAGTTTCC
11	119124257	119124258	266	TCCCAGCACATTGGGAGGCCAAGGCTGGAGGATTGTCTGAGCCCAGGAGTTTGAGACCAGCCTGGGCAACATAGCAAGACCTCATTGCTACTAATAATAAAAAAGGCCGGGTGTGGTGGCTCACGCCTGTAACCCCAGCGCTTTGGGAGGCCGAGACAGGTGGATCACCTGAGGTCAGGAGTTCAAGACCAGCCTGGCCAACATGGTGAAACCCCGTCTCTACTAAAAATACAAAATTAGCTGGGTGTGGTGGTG
11	119809135	119809136	640	CCCCCACCCTCTCTCTCTCTCATCTCTTCCCCACCCCCCTCTCTCTTGTCTCTCCCCCACCCTCTCTCTCTCATCTCTACCCCACCCCCTCTCTCTCTTATCTCTTCCCCACCCCTCTCTCTCTCTCTCTCATCTCTCCCCCACCGCTCTCTCTCTCGTCTCTCCCCCACCCTCTCTCTCTCATCTCTTCCCCCCACCCCTCTCTCTCTCGTCTCTCCCCACCCCTCTCTCTCTCATCTCTTCCCCACCCCTCTC
11	119953786	119953787	189	GTGGATCACTGTTGTGGGGAAATGCTGAGCTGAGGCCGGTGGATCACTGACGTGGCAAATGCCGAAGTGAGGCAGGTGGCTCACTGTTGTGGGAAATGCTGAGGTGAGGCAGGTGGATCACCGCCATGGGAAATGCTGAGGTGAGGCAGATGGACCACTGTTGTGGGAAATGCCGAGGTGAGGCAGGTGG
11	120138456	120138457	608	AAAAAAAATGGGTGTCACTGTCCAGCTCTCAAGGAATTCATAGACTAGCAGAAGAGGGAAACATACAAAGAGGGAGTGACACAATGAGTGCCACGCAACCAGCAGAGAGGCCTCCCGGATTCCAGAGGGGAGAGGGACTAACTCCATGCGAGGGAGCAGTGCACGGAGGCACGGTAACGTGAGCGTGTGTGTTAGGATGCAAGTGAGTACTTTGTGTGGCTGGAGCTCAGGGTACCTGGGAGAAAAAGTAAGGTA
11	120199481	120199482	953	CACACACACACAATATGACTGTTATCCTTAGAAGGGATTAGGACACAGGTATGCATACATAAACATACACACACACACACACACACACACACACTATGACTGTTATCCTTAGAAGGGATTAGGACACAGGTATGCATACATAAACATACACACACACACACACACACACACACACACACTATGACTGTTATCCTTAGAAGGGATTAGGACACAGATATGCATACATATACAAACATACACGCACACACACACACA
11	120747095	120747096	699	CACCATCATCATCATCACCACCACCACTATCACCACCATCACACCACCACCACCATAATCACCATCACCACCACCACCACCATAATCACCATCACCACCACCATCACCATGATCACCATCACCACCACCACCATAATCACCATCACCACCACCACCATAATCACCACCACCACCACCACCATCATCATCATCACCACCACCATCACCACCATCACACCACCACCACCACCACAATCACCATCACCACCACCACCA
11	121056837	121056838	598	AATGAATGAGTAGGGAAAGCAGATGTTCAATGCTTAATGAATGAGTAGGGAAAGCAGATGTTCAATGCTTAATGAATGAGTAGGGAAAGAAGATGTTCAATGCTTAATGAATGAGTAGGGAAAGCAGATGTTCAATGCTCAATGCTTAATGAATGAGTAGGGAAAGCAGATGTTGAATGCTTAATGAGTAGGGAAAGCAGATGTTCAATGCTTAATGAATGAGTAGGGAAAGCAGATGTTCAATGCTGAATGAAT
11	122707270	122707271	74	CCCAAGGGATCAGGATCAGCTGAGGGGGGTCTCAAGGTCCTTTTCCTTGCCTTGAGGTGGAGCAACTCTGAAGCT
11	122860407	122860408	877	GGTGATGATGGTGATGATGGTGATGGTGATGGTGGTGATTGTAGTGGTGGTGGTGGTGATTATGGTGATGGTGGTGGTGGCGGTGATGGTTGTGGTGATGGTGGTGGGTGATGGTGGTGACGATGGTGGTGGTGATGGTGGTGGTGGTGGTGATGGTGGTGGTGGTGGTGGTAGTGGTGGTGGTGGTGATGGTGGTGGTGGTGGTGATGGTGATTATGGTGATGGTGGTGGTGGTGGTGATGGTGGTGGTGGTGG
11	123241794	123241795	243	TTTTTTTTTTTTTTTTTTTTTTTTAATTTTTTTTTTTATTATACTCTAAGTTTTAGGGTACATGTGCACATTGTGCAGGTTAGTTACATATGTATACATGTGCCATGCTGGTGGGCTGCACCACTAACGTGTCATCTAGCATTAGGTATATCTCCCAATGCTATCCCTCCCCCTCCCCCGAACCCACCACAGTCCCAGAGTGTGATATTCCCCTTCCTGTGTCCATGTGATCTCATTGTTCAAT
11	124166954	124166955	164	TTATACGTACATATTATATACGTATATTTTATACGTACATATTATATACGTATATTTATACGTACATATTATATACGTATATTTATACGTACATATTATATACGTATATTTATACGTACATATTATATACGTATATTTATACGTACATATTATATACGTATATTT
11	126146211	126146212	1847	TGTGTGTGTGTGTGGTGTGTGTGTGTATGGGGTTGGGGAGGTGTGTGTGTGTGTGGTGTGTGTGTGTATGTATGGGTTGGGGAGAGTGTGTATGTGTGTGTGTATGGGGTTGGGGAAGGTGTGTGTGTGTGTGTGTATGGGGTTGGGGAGAGTGTGTATGTGTGTGTGTATGGGGTTGGGGAGGGTGTGTGTGTGTGGTGTGTGTGTACGGTTGGGGAAAGTGTATGTGTGTGTGTGTGTGTGTGTATGGGGTTG
11	126502579	126502580	898	AGAGAGAGAGAGAGAGAGAGAAAGAAGAAGAAAAAGAAAGGAAAGGAAAGGAAAGGAAGGAAAGGAAGGAGGGAAGGAAGGAAGGAAGGAAGGAAGGAAGGAAGGAAGGAAGGAAGGAAGGAAGGAAGGAAGGAAGGAAGGAACGGTAGCGGCTATCCAAGGTGCGGACAACAGCCCTTATAGCGCCTCTGTAGCCTCAGTGCCTAGACCACCTGGGGGTAGAAACGAGGGGTTCCACTGAGTAGCAGGCTTGTC
11	126669366	126669367	846	ATACACACATGCACACACAGATACATGCACAACACAGATACACACATGCACACACACAGATACACACATGCAAACACAGATACACACATGTGCACACACAGATACATGCACACACAGATATGTGTACACACAGATACACACATGCACACATGAATACACACACGCAGATACATGCACACACACAGATACCACGTGCACACACAGATACACACATGCACACACACAGATACACACATGCACAACACAGATACGCAC
11	126941134	126941135	333	TGAAAATATAGCAGTGGGCCGGGCGCGGTGGCTCACGCCTGTAATCCCAGCACTTTGGGAGGCCGAGGCGGGCGGATCACGAGGTCAGGAGATCGAGACCATCCTGGCTAACAAGGTGAAACCCCGTCTCTACTAAAAATACAAAAAAAAAAAAATTAGCCGGGCGTGGTAGCGGGCGCCTGTAGTCCCAGCTACTCGGGAGGCTGAGGCAGGAGAATGGCGTGAACCCGGGAGGCGGAGCTTGCAGTGAGCCGA
11	127997827	127997828	315	TAGCAGTTCTTTTTTTTTTTTTTTTTTTTTTTTTTGAGACGGAGTCTCGCTCTGTCGCCCAGGCTGGAGTGCAGTGGCGGGATCTCGGCTCACTGCAAGCTCCGCCTCCCGGTTCACGCCATTCTCCTGCCTCAGCCTCCCAAGTAGCTGGGACGACAGGCGCCCGCCACTACGCCCGGCTAATTTTTTGTATTTTTAGTAGAGATGGGGTTTCACCGTTTTAGCCGGGATGGTCTCGATCTCCTGACCTCGTGA
11	128800485	128800486	102	AGCCTCCCTAACCCCAGCCTCCCTACCCTGGCCTCCCTAACCCCAGCCTCCCTAACCCCGGCCTCCCTAACCCCGGCCTCCCTAACCCCGGCCTCCCTAACCC
11	129450363	129450364	282	GCCCCTCACTGGCCTCCTACCCCGGCCCCTCACTGGCCTCCTTCCCGGCCCCGCACTGGCCCCCTACCCCGGCCCGCACTGGCCCCCTTCCCCGGCCCCTCACTGGCCTCCTTCCCCGGCCCCGCACTGGCCCCCTTCCCCGGCCCCTCACTGGCCTCCTTCCCCGGCCCGCACTGGCCTCCTTCCCCGGCCCCTCACTGGCCTCCTTCCCCGGCCCCTCACTGGCCTCCTTCCCCGCCCCGCACCGGCCTCCTA
11	129759557	129759558	318	CATCAGCACTTCTTTTTTTTTTTTTTTTTTTTTTTTTGAGACGGCGTCTCGCTCTGTCGCCCAGGCTGGAGTGCACTGGCGGGATCTCGGCTCACTGCAAGCTCCGCCTCCCGGGTTCACGCCATTCTCCTGCCTCAGCCTCCCAAGTAGCTGGGACTACAGGCGCCCGCCACTACGCCCGGCTAATTTTTTGTATTTTTAGTAGAGACGGGGTTTCACCGTTTTAGCCGGGATGGTCTCGATCTCCTGACCTCG
11	13023206	13023207	83	ATCTGTCACTGCCTCCCATCACCCCCAGATGGAACCGTCTAGTTGCAGGAAAACAAGCTCAGGGCTCCCACTGATTCTACATCA
11	13038059	13038060	173	ATATTTAAGATGGTTTGGAAGGTTGTAGATTAATATGTCGGCATAGGTGCCTATCATGAGAGCAAGGAGGGAAAAAGGAGTGGGAATGGGAGCTGCCATGTTGCACACTGTGTGCTAGTTACACTCCAGGTGTGAGTGTGACTAGCACGCAGTGTGCAACATGGCAGCCTTGAA
11	130675911	130675912	307	TTTTTTTTTTTTTTGAGACGGAGTCTCGTTCTGTCTCCCAGGCTGGAGTGCAGTGGCGCGATCTCGGCTCACTGCAAGCTCCGCCTCCCGGGTTCACGCCGTTCTCCTGCCTCAGCCTCCCGTGTAGCTGGGACTACAGGCGCACGCCACCATGCCCGGCTAATTTTTGTATTTTTAGTAGAGACGGGGTTTCACCGTGTTAGCCAGGATGGTCTCGATCTCCTGACCTCGTGGTCTGCCCGCCTCAGCCTCCCA
11	13092201	13092202	320	TGAAAATTACATTAATTGCCGGGTGCGGTGGCTCACGCCTGTAATCCCAGCACTTTGGGAGGCCGAGGCGGGCGGATCACGAGGTCAGGAGATCGAGACCATCCCGGCTAAAAAACGGTGAAACCCCGTCTCTACTAAAAATACAAAAAATTAGCCGGGCGTAGTGGCGGGCGCCTGTAGTCCAGCTACTTGGGAGGCTGAGGCAGGAGAATGGCGTGAACCCGGGAGGCGGAGCTTGCAGTGAGCCGAGATCCC
11	131178197	131178198	136	CTGGCTAATTTTTGTATTTTTAGTAGAAACGAGGTTTCACCATGTTGACCAGGCTGGTCTGAAACTCCTAACCTCAAGTGATTTGCCCAGCTCGGCCTCCCAAAGTGCTGGGATTACAGGCGTGAGCCACCATGCGC
11	131469260	131469261	53	CGGGGCATCTGCCGGAGACTGGGTAGACGGGGCATCTGCCGGAGACTGGGTAGA
11	131550706	131550707	1769	AGGAGCACGCATGCTCACACACACAACAGGCACTCACAGACACAGAAGAAGACAAACACACAGACACAGAGGCACACATGCCTACACAGACACACACACACACACAGGCACTCACAGACACAGACACAGGCATGATCTCACACACAGACACAGAGGCACACATGCCTACACAGACATATGCATACACAGCACTCACAGACACAGACACAGACATGATCTCACACACACAGAGGCACACATGCCTACACAGACACA
11	131995624	131995625	1128	GTTTGTGGTGCGTGGTGGGGTATGTGGTGTATGTGTTGTATGGTGTGGTATGTGGTATGTGTGTGGTGTGTAGTGTTGTGTTATGTGTGTGTTGTGGGTATGTGGTATGTCTAGTGATATGGTGTGTGTGGTGTGTGTGTGTTATGTGTGTGGTGTGGTATGAGGTGTAGTGTATTGTGTGGTGTGGTATGTGTGTAGGTGTAGTATGGTGTGTGTGTGGTGGTGTGTGTGATGTATGTTGTATATGGTGTGTGT
11	132897687	132897688	1337	CACACCACACATGAATCGCATCATACACACGCACCACACACACATCGTACTACATTCCCAACCTACCTCCACACGCACACCCACCACAGACACCACACACACACCACACACCACACATGCATCACACCAAACACACACAGCACACACACAATACTACACCCCCACCCACCTCCCACACACACCCCACCACAGACACACCACACATACACGTCACATTACACTCCCAACCACCTCCACACACGCCCCACCAGACAC
11	13309944	13309945	52	AAAGAAAGAAAGAAAGAAAGAAAGAGAAAGAAAGAAAGAAAGAAGAAAGAAAG
11	133224109	133224110	1895	GTGATGACGTAATGATGCTGGTGGTGATGGTGATGGCCGGGGTGACGATGATGCTGGTGGTTGTGGTGATTGGGTGGTGATAATTGTGATGGTGATGCCGATGCCGGTGGTGATGGCAGTGGGAGTGTGATGGTGATGTAGTGTGGTGGTGGTGATGTTGATAGTGCTAGTGGTGATGATGGTGGTGATGGTGATGGTAGTGATGATAGTGATGATGCTTGGTGGTGGTGATGATGGTGATGGTGATGATGCTGT
11	134305643	134305644	319	TTTTTTTATTTTTTAAAATTTTTTTTTTTTATACTCTAAGTTTAGGGTACATGTGCACATTGTGCAGGTTAGTTACATATGTATACATGTGCCATGCTGGTGCGCTGCACCCACTAACGTGTCATCTAGCATTAGGTATATCTCCCAATGCTATCCCTCCCCCCTCCCCCAACCCCACCACAGTCCCTAGAGTGTGATATTCCCCTTCCTGTGTCCATGTGATCTCATTGTTCAATTCCCACCTATGAGTGAGAA
11	134435502	134435503	249	ATCACTGTCACCATCATCATCATTATCGCCATCATCGTCACCATCATCACCATCATCACTGTCGCCATCGTCATCATTATCGCCATCATCGTCACCATCACCATCATCACTGTCACCATCGTCATCATTATCGCCATCACCGTCACCGTCATCACCATCATCATCACTGTCACCATCGTCATCATTATTGCCATCACCGTCACCGTCATCACCATCATCATCACTGTCACCATCGTCATCATTATCGCCA
11	134629789	134629790	269	TCACACTGGAGTCGATGGCACACACAGGTCCCTGCTGTGCACAGGCTGAGCTCTGTGCAGTCACACTGGAGTCGATGGCACACACGGGGCCCTGCTGTGCATGGGCTGAGCTCTGTGCAGTCACATTGGAGTCAATGGCACACACGGGGCCCTGCTGTGCATGGGCTGAGTTCTGTGCAGTGCCGGGTCCTCAGTCACATTGGAGTCAATGGCACACACAGGTCCCTGCTGTGCACAGGCTGAGCTTCTGTGCAC
11	134700476	134700477	72	GAAGAAAAGGGGAAGGGAAGGAGAAGAGAAGGGGAAGTGAAGGTAAGGGAAAGGGGAAGGGAAGGGAAAGGGA
11	14500025	14500026	324	TATTTTTTTTTTTTTTTTTTTTTTTTTTGAGACGGAGTCTCGCTCTGTCGCCCAGGCTGGAGTGCAGTGGCGGGATCTCGGCTCACTGCAAGCTCCGCCTCCCGGGTTCACGCCATTCTCCTGCCTCAGCCTCCCAAGTAGCTGGGACTACAGGCGCCCGCCACTACGCCCGGCTAATTTTTTTTTGTATTTTTAGTAGAGACGGGGTTTCACCGTTTTAGCCGGGATGGTCTCGATCTGCTGACCTCGTGATCC
11	14863276	14863277	1063	TGGTGAAACCCCATCTCTATAAAAAACACACACAAAATTAGCCAGCCATGATGGCATGCACCTGTAGTCCCAGTTACTCAGGAGGCTGAGGTGGAAGGATGGCTTGAGCCCAGGAAGCAGAGGTTTCAGTGAGCTGAGATCATGCCACTGCACTCCAGCCTGAGTGACAGAGCCAGACCCTGTCTCAAAAAACAAACAAACAAACAAACAAAAAACAGCACGGTACCAGCACAAAAACAGGTATTTGAACCAATG
11	1559027	1559028	6006	GCTAATTTTTGTGTTTTTAGTAGAGATGGGTTTCACCATGTTGGCCAGGCTGGTCACAAACTCCTGACTCAGGTAGTCCACCCACCTTGGCCTCCCAAAGTGCTGGGATTACAGCATGAGCCACCGCACACCCAGCCTTTTTCTTTTCTTTTCTTTTTTTGAGATGGAGCCTTCCTCTGTCACCCAGGCTGGAGTGCAGTGTGTGTGATCTCCAGCTCACTGCAGCCTCTTCCTCCTGGGTTCAAACGATTTTCC
11	1598289	1598290	68	AGGGATCCTCCCATCACAGCCTCCTGAGTAGCTGGCACTACAGGCATGTGCCAGCATGTCCAGCTAATT
11	1651203	1651204	159	AGCCGGAGCCACAGCCTCCACAGCCGGAGCCACAGCCCCCACAGCCGGAGCCACGGCCTCCACAGCCGGAGCCACAGCCCCCACAGCCGGAGCCAAGGCCTCCACAGCCGGAGCCACAGCCCCCACAGCCGGAGCCACAGCCCCCACAGCCGGAGCCACA
11	1685889	1685890	208	CCCTTCCTTCTCTGCTCCCTCCCTCCCTCCTCCTCCTCCCCCTCCTTCCCTGCCTCCCTCCTCCCTCCTTCTCTGCCTCCTTCCTCCCCCCTTCCCCTTCCTTCCTTTCCTTCTCTGCTCCCCCCCTCCCTCTTTCCTCCTCCCTCCCTCTCTTCCCTCCTTCCTCCTCCCTCCTCCCCTCCCCTCCTCCCTTCCTTCCTTCTTTCTTT
11	1691785	1691786	394	CAGTGTGGATAGTGTGGATAGTGTGGATAGTGTGGGTAGTGTGGGTAGTGTGGGCAGTGTGGGCAGTGTGGCAGTGTGGGGCAGTGTGGGCAGTGTGGATAGTGTGGGTAGTGTGGGTAGTGTGGGTAGTGTGGGCAGTGTGGGTAGTGTGGGTAGTGTGGGCAGTGTGGGTAGTGTGGCAGTGTGGGTAGTGTGGATAGTGTGGGTAGTGTGGGCAGTGTGGGTAGTGTGGGTAGTGTGGGCAGTGTGGGTAGT
11	17574103	17574104	414	AGGTGGGAGACACAGGACAGGTGGGAGACACAGGACAGGTGAGGGACACAGGACAGGTGGGAGACACAGGACAGGTGAGGGACACAGGACAGGTGGGAGACACAGGACAGGTGGGGGACACAGGACAGGTGGGGGACACAGGACAGGTGGGGGACACAGGACAGGTGGGAGACACAGGACAGGTGGGAGACACAGGACAGGTGGGGGACACAGGACAGGTGGGAGACACAGTACAGGTGAGGGACACAGGACAGG
11	18399887	18399888	2613	CCTGAGTAGCTGACACTACAGGCATGCGCCACTGCACCCAGCTAATTTTTGTATTTTTAGTAGAGACAGAGTTTCTTTCCTTTTTCTTTTTTTTTTGAGATGAAGTTTCACTCTTATTGCCCAGTCTGGAGTATAATGGCGCGATCTAGGCTCACTGCAACTTCTGCCTCCTGGGTTCAAGCAGTTCTCCTGCCTCAGCCTCCAAGTAGCTGGGATTACAGGCGCCCACCACCACGTCCAGCTAATTTTTTGTAT
11	18918574	18918575	325	TTTTTTTTTTTTTTTTCTTTTTTTTGAGACGGAGTCTTGCTCTGTCGCCCAGGCCGGACTGCGGACCGCAGTGGCGCAATCTCGGCTCACTGAAAGCTCCGCTTCCCGGTTCACGCCATTCTCCTGCCTCAGCCTCCGAGTAGCTGGGACTACAGGCGCCCGCACCAGCGCCCGGCTAATTTTTTGTATTTTTAGTAGAGACGGGGTTTCACCTTGTTAGCCAGGATGGTCTCGATCTCCTGACCTCATGATCCA
11	19382760	19382761	331	TAGGCCGGGCGCGGTGGCTCACGCCTGTAATCCCAGCACTTTGGGAGGCCGAGGCGGGTGGATCATGAGGTCAGGAGATCGAGACCATCCTGGCTAACAAGGTGAAACCCCGTCTCTACTAAAAATACAAAAAATTAGCCGGGCGCGGTGGCGGGCGCCTGTGGTCCCAGCTACTCGGGAGGCTGAGGCAGGAGAATTGGCGTGAACCCGGGAAGCGGAGCTTGCAGTGAGCCGAGATTGCGCCACTGCAGTCCG
11	194908	194909	113	GTGTGCTCTTGAGTGGGATCCTCTGTATGTGGGTCTGTGTGTGTGGCTGTGGCCCTGAGTGTGTCTTCCTGATGTCCCCATTTGTGTGTCCCTCTTGTGGTGGACTTTCGCACA
11	19640463	19640464	404	GTGGGGGGAGTGGGGAGGGATAGCATTAGGAGATATACCTAATGGAAATGACAAGTTAATGGGTGCAGCACACCAACATGGCACATGTATACATATGTAACAAACCTGCACAGTGTGCACAAGTACCCTAGAACTTAAAGTATAAAAAAAAAGAACAAACAAAATTTTGAAAAACACAAAAAAATTAAATGATCACATTTGAGCCCTACAATATTCCTGTGAGGTAAAGAATATTTAGCCTAGGATCAGAGGCAG
11	21338971	21338972	84	TTGCTATTTTGGTAAATAGCATTTTGGCAATATATGCTAAAGAGTACACACTTATTTGTGTACTCTTTAGCATATATTGCCAAAA
11	2209156	2209157	355	CACACATACACCACACAAACTGCACAAACCACACACCACACCACACACACCTACAAACACCATGCACATACACACACCACACACACACACCACACACCATACATACACCACACGCACATACAGGCACACATAACACACATCATACACATCACACACATACTACACACATACAACACACACATATTACACACTACACACACATACAGGCATACACATGCACATCACACATACACAAACCACATAGTCACACACAAC
11	221081	221082	609	ACCCTTCAGGAGTACTTGCATGGTAGATAAGGATGACACACAGGGATATTCACCGGAAGGCAAGTTCTCAGTATTTTATCAGCATTTACCCTTCCAGAGTACTTGCATGGGTAGATAAGGATGATACACAGGGATATTCACTAACAGCATTTACCTTCAGGAGTACTTGCATGGGTAGATAAGGATGACACACAGGGATATTCACCGGAAGGCAAGTTCTCAGTATTTATCAGCATTTACCCTTCAGGAGTACTT
11	22262801	22262802	124	TGGGAATATACAACATTTGGTTTTCTGTTCTTGTATTAATTTGCTTAGGATAATGGCCTCCAGCTGTGTCAATGTTGTACAAAGGACATAATTTTATTCTTTTTGATGGTCGTGTAGTATTCCTT
11	22265424	22265425	1125	TCTTGTGTATAGATTTTTGCATCTCAGCTTAGTTCAATTCTTCTATAATTTTAGTTGTTTTTTTCTGCTAGCTGTGGAGTTAGTTTGTTCTTATTCTCTAGTTCCTCTAGGTGGAATTTTAGATTGGTATTTTGAGGTCTTTCTTACTACTTAATTGAGGCATATTAGAGCTATAAATTTTCCTCTTAGGACTGTGTTAACAGCATCCCAAAGATTTTGGTAAGTTGTATCCTATATTTTATTAATTTCAAATAA
11	2259392	2259393	62	TTCTTCATGTAACTTACTTGTGTCTTCATAGCAGGAATGGGGACCACGGGCATTTGGGCCACT
11	23038135	23038136	264	ATGCACTCCAAACACTACCCATTTGTGTCCCATCACAGACAGCTATCAGGGCTCAAAAGACCCTAATGCCAATTATTACCATCAATGTAAAATTTGGCAAGCAATAAACAAAGCCTTTTTGCTCTGTTGGGGCCCTGAGTGGCCACTGTTCTGTTACTTTACAGTTCTGTATATTTAAATTGATAGTAAACTTTGTGTCCTCCAGCCTCCAAAAGTTCCATCTTCAGCTTGTATTACAACAATATCAGCCCCTTG
11	23113313	23113314	63	ACATATATATAATATATATACACACATATATATATACACACACATACATATATATACACGTGTA
11	23522805	23522806	102	GGCCGGGCGCGGTGGCTCACGCCTGTAATCCCAGCACTTTGGGAGGCCGAGGCGGGTGGATCATGAGGTCAGGAGATCGAGACCATCCTGGCTAACAAGGTGA
11	24009187	24009188	70	GCTCTCTCTCTCTCTCTCTCTCTCTCTCTCTCTCTCTCTCTCTCTATATATATATATATATATATATATAT
11	24393092	24393093	6636	GCACCATGCCCAGCTAATTTTTTGTATTTTAGTAGCAACTAATTTTTGTATTTTAGTAGAGATGAGGTTTCACCATGTTGGCCAGGCTGGAAACGTAGTCTTTTTCTAATTCTGTGAAGAATGTAAATGATAGTTTAATGGGAATAACATTGAATATTTAAATTACTTTGGGAATTATGGCCTTTTCCACAATATTGATTCTTCCTATCCATGAGCATGGAATGTTTTTCCAATTGTTGGTTTCCACTGTGATTT
11	25065675	25065676	147	ATATATATCTGATATATAGAGTCTATATATATCAGATATATATAGACTATATATATCAGATATATAGACTATATATATCAGATATATAGACTCTATATATCAGATATATATAATAGACTCTATATATATATCTGATATATATAGAGAC
11	25605124	25605125	304	TAAAAGGAACTTAGTTGGCCGGGCGCGGTGGCTCACGCCTGTAATCCCAGCACTTTGGGAGGCCGAGGCGGGTGGATCATGAGGTCAGGAGATCGAGACCATCCTGGCTAACAAGGTGAAACCCCGTCTCTACTAAAAATACAAAAAATTAGCCGGGCGCGGTGGCGGGCGCCTGTAGTCCCAGCTACTCGCGGAGGCTGAGGCAGGAGAATGGCGTGAACCCGGGAAGCGGAGCTTGCAGTGAGCCGAGATTGC
11	25625110	25625111	132	TATATAGTGTATATATATTATACTATATATTCTATATATAGTGTATATATATACTATATATTCTATATATAGTGTATATATTATTACTATATATATTCTATATATAGTGTATATATTATACTATATATTCTTA
11	25653707	25653708	329	TGTTGGCCGGGCGCGGTGGCTCACGCCTGTAAATCCCAGCACTTTGGGAGGCCGAGGCGGGTGGATCATGAGGTCAGGAGATCGAGACCATCCTGGCTAACAAGGTGAAACCCCGCTCTCTACTAAAAAATACAAAAAATTAGCGCGGGCGCGGTGGCGGGCGCCTGTAGTCCCAGCTACTGGGGAGGCTGAGGCAGGAGAATGGCGTGAACCCGGGAAGCGGAGCTTGCAGTGAGCCGAGATTGCGCCACTGCA
11	27039967	27039968	309	AATAAAAAGAACTGGTCGGCCGGGCGCGGTGGCTCACGCCTGTAATCCCAGCACTTTGGGAGGCCGAGGCGGGCGGATCACGAGGTCAGGAGATCGAGACCATCCCGGCTAAAACGGTGAAACCCGTCTCTACTAAAAATACAAAAAATTAGCCGGGCGTAGTGGCGGCGCCTGTAGTCCCAGCTACTCGGGAGGCTGAGGCAGGAGAATGGCGTGAACCCGGGAGGCGGAGCTTGCAGTGAGCCGAGATCCCGC
11	30294203	30294204	73	AGCCACTTGGAATCTCATTTTTTTCTTTTTGGCAGCTTGAGGGATCTTCTCTTTGTCTTCAGTATCCTGAAATT
11	30950162	30950163	1724	TAATTTTTCACATATTAAAGTATGTCGAGATAATTGACAATGTATTCTGAGATATCAGTCGAATCTCGGATCATTTGTTTCAGAAGTGTTCACACTGAAAAGAAAGAGAAAATCTGTGTCACTAAATATTCTGGAATAGAAATGGACCAGGTAGAATTTCACCAATTTTTGGAAAGGTAAATACTTAATATCCTAAATGCAAATGCTTTTTCCATTTAAATACCTGAATGATTATTTATAACAGATAACATACTA
11	3118360	3118361	903	GAAGACGGGAGGAGGAGAAGAGGAAAGGGGGAAGATGGGAGGAGGAGAGGAAAGGGGGAAGACAGGAGGAGGAGTGGAAAGAGGGGGAAGATGGGAGAAGAAGAGGAAAGAGGGAAAGATGGAGGAGGAGAGGAAAGAGGGAAAGATGGGAGGAGGAGAGGAAAGAGGGGAAGACGGGAGAAGGAGAGGAAAGAGGGGAAGACGGGAGAAGGAGGAGAGGAAAGAGGGGGAAGATGGAGGAGGAGAAGAAAGGGG
11	3226322	3226323	93	AGGAGGCTGCTCTGTGGGGCTGGCTGTGGGGAGGAGGCTGCTCTGTGGGGCTGGCTGTGGGGAGGAGGCTGCTCTGTGGGGCTGGCTGTGGGGA
11	3278871	3278872	55	CATCCTACCTGCATCCTACCTGAGTCCCACCTGCATCCCACCTGCATCCTATCTGC
11	33424847	33424848	370	ACGCAGACACACAGACACGCAGACACAGATACACATACAGACATACACACAGGGACACACACAGAGACTCAGGGACACACACACACAGACACACACAGACATAGACATATGCAGACACACACAGACACACACATGCAGACACAGACACACATGGACACACACATGCAGACACGCGGACAGACACACACAGACACAGAGACACACACGCAGACAGAGACACAGACATACACAGAGACCCAGGGACACACACACACA
11	33624794	33624795	340	TGCCCATCTTTTTGTTTGTTTGTTTGTTTGTTTGTTTTTTTTTTTTTTTTTTTTTTTTTTTGAGACGGAGTCTCGCTCTGTCGCCCAGGCTGGAGTGCAGTGGCGGGATCTCGGCTCACTGCAAGCTCCGCCTCTCGGGTTCACGCCATCTCCTGCCTCAGCCTCCCGAGTAGCTGGGACTACAGGCGCCCGCCACCACGCCCGGCTAATTTTTTGTATTTTTAGTAGAGACGGGGTTTCACCGTTTTAGCCGGG
11	33670139	33670140	1665	CTGGCCTAGTGTATTTATTTATTTATTTTTTATTTTTATTTATTTATTTATTTATTTATTTATTTTTATTTTTTATTTTTTTATTATACTCTAAGTATTAGGGTACATGTGCACATTGTGCAGGTTAGTTACATATGTATACATGTGCCATGCTGGTGCGCTGCACCCACTAATGTGTCATCTAGCATTAGGTATATCTCCCAATGCTATCCCTCCCCCTCCCCCGACCCCACCACAGTCCCAGAGTGTGATATT
11	3380001	3380002	51	CTATTCCTTTCTCCTTCAAATCCTCCATTGTTTACTTAAATTGGATTTTGCT
11	34048236	34048237	61	TATATACACGTATATATACGTATATACACGTATATATACGTATATATACGTATATACACGAT
11	34427332	34427333	92	CTCCACCCTTCCATCTCTCCACTTCTCTCTCTCTCCACCCTCCCATCTCCTTACTTCTCTCTCCTTCCACCCTCCCATCTCCACACTTCTCTC
11	35270195	35270196	89	GTAATCCCCTGGTGATCCATGTAGCACTAGTAATCACCTGGTGATCCATGCACCACTAGTAATCCCAGGTGATCCATGCACCGCTAGTAA
11	35270305	35270306	172	CCTGGTGATCCATACACTGCTAATAATCCCTGGTGATCCATGCACTGCTAGTAATCCCCTAGTGATCCATACACCGCTTGTAATCCCCTGGTGATCCATGTAGCACTAGTAATCACCTGGTGATCCATGCACCACTAGTAATCCCCTGGTGATCCATGTAGCACTAGTAATCA
11	35425484	35425485	502	GGCAAAGGAGGAAACAGCTCAAAGGCAAAGGGGGAAAGTCTTTTTTTTTTTTTTTTTTTTTTTTTTTTTTTGAGACAGAGTCTCACTCTGTGGCCCAGGCTGGAGTACAGTGGTGCAATTTCAGCTCACTGCAACCTCCGCCTCCCGGGTTCAAGCGATTCTCTTGCCTCAGCCTCCCAAGTAGCCAGGACTACAGGTGCTCGCCACCATGCCCGGCTAATTTTTGTATTTTTGGTAGAGACGGGTTTCACTGTT
11	356451	356452	3581	GGGGGTGTGTGTCTGTGCATGGTGTGTGTATGTGTGGTGTGTGTGTATATATGTGTGTGCATGGTGCATGTATGTATGTGTTGTGTATGTGTGTGTGCATGGTGCATGTGTGTGTGGTGTGTGTGTGCATGGTGCTTATATGTGTGTGGTGTGCGTGTGGTGTGTGTGCCTGTGCGTGTGTGTATGTGTGTGGTGTGTGTGTATGTGCATGGTGCATGTATGTGTGTTTGTTGTGTGTGTGTGTGTATGGTGCAT
11	36076670	36076671	415	TACTGGAAGCCTTCTCTCCCTTCCTATCCAGGCTAGGTAGATGCCCCTTGTCCCTGCTCCCATAGCATTGCCTCTCTCTACATTTGACTTGTAAACAAGAAGATACAGTAAACTGTTATAGTTTTCATTTTCCAAGGAATCAGATGCTTCAGTACAGCCAGGAAAAGGTCTGATACACCTTGTTCACTGTTATCCCCACACCAAACAACATTAGCTCCTGCTACATGGGAGATGCTTAGTACACTTTTGTTGAAT
11	36308878	36308879	356	CATGTAGCATGTATATACTACATACTATGTATATCATGTAGCATGTATACTACATACTATGTATATCATGTAGCATGTATACTACATACTATGTATATCATGTAGCATGTATACTACATACTATGTATATCATGTAGCATGTATACTACATACTATGTATATCATGTAGCATGTATACTACATACTATGTATATCATGTAGCATGTATATACTACATACTATGTATATCATGTAGCATGTATACTACATACTATG
11	36331216	36331217	2208	ATTGGGGATGATGGTGGTGGTGGTAGTGGGATGGTGGTGGTGGTGGTATTGGGGATGATGGTGGTGGTGGTATTGGGGATGATGTGTGGTGGTGGTAGTGGGGATGATGGTGGTGTGGTAATGGGATGGTGGTGGTGGTATTGGGATGATGGTGGTGGTGGTAGTGGGGATGGTAGTGGTGATGGTAGTGGGGATGGTGGTGGTGGTATTGGGGATGATGGGTGGTGGTATTGGGGATGATGGTGGTGGTGGCAG
11	36529010	36529011	408	TATACATATATACATTTATGTATAATACATTTACGTATGTATAATGTATATATACATACATTTACGTATGTATAATGTATATATACATTATACATTTACGTATGTATAATGTATATATATACATTATACATTTACGTATGTATAATGTATATATACATTATACATTTACGTATGTATAATGTATATATACATTATACATTTACGTATGTATAATGTATATATACATTATACATTTACGTATGTATAATGTATATA
11	36529123	36529124	238	CGTATATACATGTGTACACATGTATATACGTATATACATGTGTACACATGTATACGTATATACATGTGTACACATGTATACGTATATACATGTGTACACATGTATACGTATATACATGTGTACACATGTATACGTATATACATGTGTACACATGTATACGTATATACATGTGTACACATGTATACGTATATACATGTGTACACATGTAGATACACGTATATATACATATATACATGTAT
11	37706286	37706287	315	TCTTTTTTTTTTTTTTTTTTTTTTTTGAGACGGAGTCTCGCTCTGTCGCCCAGGCTGGAGTGCAGTGGCGGGATCTCGGCTCACTGCAAGCTCCGCCTCCCAGGTTCACGCCATTCTCCTGCCTCAGCCTCCCAAGTAGCTGGGACTACAGGCGCCCGCCACTACGCCCGGCTAATTTTTTGTATTTTTAGTAGAGACGGGGTTTCACCATTTTAGCCGGGATGGTCTCGATCTCCTGACCTCGTGATCCGCCCG
11	38214215	38214216	10343	CTGCAGGTCTGTTGGAGTTTGCTAGAGTCCACTCCAGACCTGTTTGCCTGTTATCAGCAGCAGTGGCTGCAGAACAGCGGATTTTCGTGAACCGCGAATGCTGCTGTCTCATCGTTCCCTGGAAGTTTTGTCTCAGAGGAGTACCCGGCCGTGTGAGGTGTCAGTCTGCCCTGCTGGGGGTGCCTCCCAGTTAGGCTGCTCGGGGGTCAGGGGTCAGGGACCCACTTGAGGAGGCAGTCTGCCCGTTCTCAGATC
11	38801076	38801077	317	AAATAAACCACTTTCTTTTTTTTTTTTTTTTTTTTTTGAGACGGAGTCTCGCTCTGTCGCCCAGGCTGGAGTGCAGTGGCGGGATCTCGGCTCACTGCAAGCTCCGCCTCCCGGGTTCACGCCATTCTCCTGCCTCAGCCTCCCAAGTAGCTGGGACTACAGGCGCCCGCCACTACGCCCGGCTAATTTTTTGTATTTTTAGTAGAGACGGGGTTTCACCGTTTTAGCCGGGATGGTCTCGATCTCCTGACCTCG
11	38812663	38812664	1369	TGTTATTATTACAGTAGTTACTCAGATTTGGTTAAGGAAGCCCAAGCAATGTATAGTGAAAGGATTATTATCTCTCTGCTAAGATTCAGATATTGTTTCAGAAATCTCAGCTCCAGTAATTCCACAACATCTAAAAACAAATGTTTGTGATCATGTGTAAGCATGAAATTGTTCCAAGTAAGTGAGGATATTTTAGTTATGTGAAAGACAGTTTCATGGAAGGTATTTGTTTTACACCAGTGGCTGGGATGGTGG
11	39001770	39001771	499	GCAAGCTCTGCCCCATGGGTTCACGCCATTCCCCTACCTCAGCTTCCTCAGAACCTGGGACTAAAGGCGCCCGCCACCACGCCCGGCTGATTTTTTGTATTTTTAGTGGAGACGGGGTTTCACCATGTTAGCCAGGATGGTCTCGATCCCCTGACATTGTGATCCGCCCTCCTCTGCCTCCCAAAGTGCTGGGACTACAGGCGTGAGCCGCCGCGCCTGGCCACCTTTTACGTTTTTAATGTCATAATTCACACT
11	39187053	39187054	81	TTGAAAAAGTACTTGCAGAGGTAAATTTGAGGATGAGGATTATGTTATCTGTAATGGGATTGTGTTTGTAGTATACTGTCAC
11	41093833	41093834	88	CCCTCAATGCTTATGATTGTTAACTGATCAGGGTGGTGGTTGCTGAGGGTTGGGGTGACTGTGGCGAATTATCAAAATAAGAGAACAAT
11	4293783	4293784	4959	TACACACACAAAGATCAGTCAATCAATTAAAGCCCTGCATTGTAGTGTTTGCCAGTTTTGGCAGTGTATGTACTCCCACCAAGGTCATTTTCAAGGTATCAAACGTGACATCACTGAATGTGAAGTTTGCAAGGAATATGCACAGATGAGCCAGTACAAGTGGCTCCACCCCGCACTGCTTTAGTCTCTCCAACTCTGTCTACCCAAGTCCAGACAATAGTACTAGTATTTTCAGCCACCTACTTTAGGTCCATA
11	4315465	4315466	4960	ACACACACAAAGATCAGTCAATCAATTAAAGCCCTGCATTGTAGTGTTTGCCAGTTTTGGCAGTGTATGTACTCCCACCAAGGTCATTTTCAAGGTATCAAACGTGACATCACTGAATGTGAAGTTTGCAAGGAATATGCACAGATGAGCCAGTACAAGTGGCTCCACCCCGCACTGCTTTAGTCTCTCCAACTCTGTCTACCCAAGTCCAGACAATAGTACTAGTATTTTCAGCCACCTACTTTAGGTCCATAA
11	43191347	43191348	318	GGGCGCGGTGGCTCACGCCTGTAATCCAGCACTTTGGGAGGCCGAGGCGGGTGGATCATGAGGTCAGGAGATCGAGACCATCCTGGCTAACAAGGTGAAACCCCGTCTCTACTAAAAAATACAAAAAATTAGCCGGGCGCGGTGGCGGGCGCCTGTAGTCCCAGCTACTCGGAGGCTGAGGCAGGAGAATGGCGTGAACCCGGGAAGCGGAGCTTGCAGTGAGCCGAGATTGCGCCACTGCAGTCCGCAGTCCGA
11	4553455	4553456	102	ATTTGCTGTTCTGCAACATTTGCTGTTCTGCAACATTTGCTGTTCTGCAACATTTGCTGTTCTGCAACATTTGCTGTTCTGCAACATTTGCTGTTCTGCAACA
11	47392923	47392924	1992	TTTTTTTTTTTTTTGAGATAGAGTCTCACTCTCACCCAGGGTGGAGTGCAATGGCATGATCACAGCTCACTGCAGCCTTGACCTCCTGGGCTAAGGTGATTCTCCCACCTCAACCTTCCGATTCACTGGGAGTACAGGCACCTGCACCATGCTCAGCTAATTTTTGTATTCTTTGTAGAGATGGGGTTTCGCCATGTTGCCCAGGCTGGTCTTGAACTCCTAGGCTCAAGCAATCCACCCACCTCGGCCTCCCAA
11	47450646	47450647	904	GGATTACAGGCGTGAGCCACCGCGCCCGGCCGTCCTTGGCCTGCTTTAACAAGAATCCTGTTAGGCCATTTTAGCAAGAATCCCCCTACTGGCCGGGCGCGGTGGCTCACGCCTGTAATCCCAGCACTTTGGGAGGCCGAGGCGGGTGGATCACAAGGTCAGGAGATCGAGACCATCCTGGCTAACACGGTGAAACCCCGTCTCTACTAAAAAATACAAAAAATTAGCCGGGCGTGGTGGCGGGCGCCTGTAGTC
11	475269	475270	828	GTGATGACATATTCACGCGTTTTGTGTGATACGGACATATTCACGCTTTTGTGATACGGACATATTCAGCGTTTTGTGTGATACGGCCATATTCACGCGTTTGTGTGATACGGACATTCACGCGTTTGTGTGATATGGACACATTCACGTGTTTGTGTGTAGGACATATTCACGCGTTTGTGTGATATGGACATATTCACGCGTTTGTGATACGGACATATTCACACGTTTGTGTGATGCGGACATATTCACGCG
11	47579123	47579124	611	CAGTGGCGGGATCTCGGCTCACTGCAAGCTCCGCCTCCCGGGTTCACGCCATTCTCCTGCCTCAGCCTCCCGAGTAGCTGGGACTACAGGCGCCCGCCACCACGCCCGGCTAATTTTTTGTATTTTTAGTAGAGACGAGGTTTCACCGTTTTAGCCGGGATGGTCTCGATCTCCTGACCTCGTGATCCGCCCGCCTCGGCCTCCCAAAGTGTTGGGATTACAGGCGTGAGCCACCGCGCCCGCCCTATTTTTCTT
11	47659910	47659911	4544	TGAGAACACGGTGAAACCCGTCTCTACTAAAAATACAAAAAATCAGCCGGGCGTGGTGGCAGATGCCTGTAATCCCAGCTACTCAGGAGGTTGAGGGAGGAGAATTGCTTGAACCCAGGAGGCGGAGGTTGCAGTGAGCCGAGATCGTGCCATTGCACTCCAGCCTGGTCAACAGAGTGAGACTCTGTCTCAAAAAAAACCACATTAGAATTGGGGGCTATGTTAAAGCCTTAAAAAGTACACTGAGGACTGCAG
11	47806656	47806657	296	TAAGAATCTGAAACTCGGCCGGGCGCGGTGGCTCACGCCTGTAATCCCAGCACTTTGGGAGGCAGAGGCGCGGCGGATCATGAGGTCAGGAGATCGAGACCATCCTGGCTAACACAGTGAAACCCCGCCTCTACTAAAAATACAAAAAATTAGCCGGGCGTCGTGGCGGGCGCCTGTAGTCCCAGCTACTCGGGAGGCTGAGGCAGGAGAATGGCGTGAACCGCGGAGGCGGAGCTTGCAGTGAGCCGAGATCCC
11	47914791	47914792	4195	TCACCTCCACGACGGGTCTCGGCGGGGCAGAGGCGCTCCCCACATCTCAGACGATGGGCGGCTGGGAAGAGGCGCTCCTCACTTCCCAGACTGGGCAGCCAGGCAAAGGGCTCCTCACATCCCAGACGATGGCGGCCAGGCAGAGACGCTCCTCACTTCCCAGACGGGGGTGGCGCCAGGCAGAGGCTGCAATCTCCGCACTTTGGGAGGCCAAGGCAGGCGGCTGGGAGTGGAGGTTGTAGCAATCCGAGATCA
11	48378754	48378755	167	TAAATTTGGGAGGGACTGGGACAGAATTACACAGTTTGGCTCTGTGTCCCCACACAAATCTCATGTTGAATTGTAATTTTCAATGCTGTGGGAGGGAACTGGTCGGGGGTGAATGGATTACAGGGGCAGATTTCCCCCTTGCTATTTTCATGAGAGTAAGTCCTCATG
11	48504636	48504637	4237	TGTTTCTTTTTTCATTGGTAAGCTAATAAACATCTTATGTAATTAATTATTTAAAATATATTATTTTTACTATGACATGAAGCAAATATTATTGAAAAGTTTGTACCTTATAGCACACTAATCATGTAGAGTCCTGGTAACTGATTCTGTCCAATGTACTGACTTTTGCTTCATTAAGTCACAGGGATTTTCCATCATATTTTCAGAACATTTGCATGTAGAGTATATTGTCCAGTATCAATCACATAACCCAGG
11	48609331	48609332	76	AAGAAGCCTCCTGAGTCTCCCCAGAGACCCACAGCAGATTGTGCTTCCAGTATTTCCTCACTAAAAAAAATTTCTGA
11	48748707	48748708	683	GGCTCACACAAATATCCCTTTGCAGATTCTACAAAAAGACTGTTCCCAAACTGCTCAATCAAAGGAGTCATTCAATTCTGTGAGACAAATGCATACATCACAAAGAATATTCTCAGAAAGCTTCTGTCTAGTTTTTCTGAAGATATTTCCTTTTTCACCATAGGCCTCAAAGCGCTCACAAATATCACTTTGCAGATTCTACAAGAACAGAGTTTCCACTGTTCAATGCAAAGAAACATTTACCTCTGTGAGATG
11	48755850	48755851	355	TTTTTTTTTTTTTTTTTTTTTTTTTTTTTTATTATACTCTAAGTTTTAGGGTACATGTGCACATTGTGCAGGTTTAGTTACATATGTATACATGTGCCATGCTGGTGCGCTGCACCCACTAATGTGTCATCTAGCATTAGGTATATCTCTCCAATACTATCCCTCCCCCTCCCCCGACCCCACCACAGTCCCCAGAGTGTGATATTCCCCTTCCTGTGTCCATGTGATCTCATTGTTCAATTCCCACCTATGAGT
11	48857815	48857816	855	GCACACATCACAAAGAAGTTTCTGAGAAGACTTCTGTCTAGTTCTTATGTGAAGATATATCTTTTTCCACGCTAGGCCTCGAAACTCTCCAAGAAGGAATTGCAGATTCTAGCACAAGAGTGTTTCAAAACTGCTCTATCAAAAAGAAGGTTCAACTCTGTGAGTTGATTGCACACATCACAAAGAAGTTTCTGAGAATACTTCTGTGCAGTTTTCATGTGAAGATATTTCCTTTTCTACCATAGGACCCAAAGC
11	48933110	48933111	313	GCTTCAGTCTAGATTTTTTTTTTTTTGAGACGGAGTCTCGCTCTGTCGCCCAGGTGGGACTGCGGACTGCAGTGGCGCAATCTCGGCTCACTGCAAGCTCCGCTTCCCGGGTTCACGCCATTCTCCTGCCTCAGCCTCCCGAGTAGCTGGGACTACAGGCGCCCGCCACCGCGCCCGGCTAATTTTTTTTTATTTTTAGTAGAGACGGGGTTTCACCTTGTTAGCCAGGATGGTCTCGATCTCCTGACCTCATGA
11	48963837	48963838	855	ACATTCTTTTTGTAGAATCTGCAAGTGAATATTTGGACTACTTTGAGGCCTTCATTGGAAATGGGAATATCTTCACATAAATACTGGACAGAAGCATTCTCAGTAACTTCTATGTTATGTGCGCATTCGAATCACAGAGTTGAACCTTCTTTTTGATAGAGCAGTTTTGAAACACTCTTTTTGTAGAATCTGCAAGTGGATACTTGGACTGCTTTGAGGTCTTCATTGGAAACGGGAATATCTTCACATGAAATC
11	48991952	48991953	683	AATGCCACTGGGGGTAGAAACACTCCTGTGATATTGTTGTTAATATCCAGGGGCAAGAGGATGCCATTACTGCAAATAGTGCAGAGGATGTACACCCGTCTATGACATAGTTGGTAATCTCCAGAGGCGGAGAAGATATTACTCACAATAACATAAACACGCTGTGTGTCCACCGTGGATCGTAATATCCTGGGGGAGAGGCGGGGTGATATTACTCCACTACTAGGATTTTACCTCTACTGCCACTCTTCGTTA
11	49655811	49655812	300	AGTGTGTGTTCTTGTTTTTTTTTTTTTTTTTTTTGTTTTTTGAGACGGAGTCTCGCTCTGTCGCCCAGGCTGGAGTGCAGTGGCGGGATCTCGGCTCACTGCAAAGCTCCGCTCCCGGGTTCACGCCATTCTCCTGCCTCAGCCTCCCAAGTAGCTGGGACTAACAGGCGCCCGCCACTACGCCCGCTAATTTTTTTGTATTTTTAGTAGAGACGGGGTTTCACCGTTTTTAGCCGGGATGGTCTCGATCTCCTG
11	497366	497367	73	GTGAGCACGAGTGTCCGTGTGTGAGCACGTGAGAGTGAGCACGAGGGTCCGTTGTGTGAGCACATGGGCAAGAA
11	49883574	49883575	532	TATTTCGTACATTACTGCAGCCACCATGAATATTGTACAGTACCATAAATACTTGACCACCTGTAGTACATAAAAACCCAATCCACATCAAAACCCCCACCCCATGCTTACAAGCAAGTACAGCAATTAACCCTCAACTGTCACACATCAACTGCAACCCCAAAGCCAACCCCTACCCACTAGAATATCAACAGACCCATCCCCCCTTAATAGTACATAGCACATAAAGCCATTTACCGTACATAGCACATTACA
11	50250214	50250215	119	CCAATTTATAATTACTCTAAAAACAAATCCCTCTAAAAAGGGAAACTAGGGACTACCCAGACAAGATGGAAATGCTCTGATTAATTTATTAAACTGCATGGAATTTCAGTCTGTAGTGAG
11	50522130	50522131	90	ATATGGTGAAAAAGGAGATATCTTCAGATAAAAACTAGAAAGAAGGTCTCTGAGAAACTGCTTTCTGATGTGTGCATTCTTCTCACAGAGT
11	50717348	50717349	172	AAAAAGAGTGTTTCAAAACTGCCTCAATCAAAAGGAAGGTTCAACTCTGTGAGATGAATGCACACATCACAAAGAAGTTTTGGAGAATGCTTCTTGTGTAGTTTTTATGTGAAGATATTTCCTTTTCCACCATAGGCCTGAACACGCTCCAAATATCCATTTGCAGATTCTAC
11	51465268	51465269	4238	TGCTTGAAATTTGGAGAGGAAATTCTGTTTCTTTTTTCATTGGTAAGCTAATAAACATCTTATGTAATTAATTATTTAAAATATATTATTTTTACTATGACATGAAGCAAATATTATTGAAAAGTTTGTACCTTATAGCACACTAATCATGTAGAGTCCTGGTAACTGATTCTGTCCAATGTACTGACTTTTGCTTCATTAAGTCACAGGGATTTTCCATCATATTTTCAGAACATTTGCATGTAGAGTATATTG
11	54825250	54825251	173	AACTAAAAGGAAGCTTTCTTGAGAAACTGCTTTCTGATGTTGGCATTCATTTCACAGAGTAAAACGTTTCTTTGGACTCAGCAGTTTAGAAACACTGTTGTAAGAACCTACGAAGGATATTTGGGAGCTCACTGAGGCCAATGGCAAAAAAGCAACTATCCCTGGGAAAAAAAC
11	55000877	55000878	170	ATTTCCTTTTCAGCTATAGGCCTCAAAGTACTCCAAATATTCATTTGCAGAACTACAAAAAGAGTGTTCCCAAACTGCTCAATCAAAACCAAGCTTCAACTCTCTGAGTTGAATGCACACATCAGAAAGTAGTTTCTGAGAATGCTTCTGTCTAGTTTTTATGTGAAGATA
11	55408899	55408900	330	AGGGCCGGGCGCGTGGCTCACGCCTGTAATCCCAGCACTTTGGGAGGCCGAGGCGGGCGGATCACGAGGTCAGGAGATCGAGACCATCCTGGCTAACACGGTGAAACCCCGTCTCTACTAAAAATACAAAAAATTAGCCGGGCGTGGTAGCGGGCGCCTGTAGTCCCAGCTACTCGGGAGGCTGAGGCAGGAGAATGGCGTGAACCCGGGAGGCGGAGCTTGCAGTGAGCCGAGATCGCGCCACTGCACTCCAGC
11	56303364	56303365	321	ACTATAGTAAAAGTTTTTTTTTTTTTTTTTTTTTTTTTTTTTTTGAGGCGGAGTTTCGCTCTGTCGCCCAGGCTGGAGTGCAGTGGCGCGATCTCGACTCACTGCAAGCTCCGCCTCCCGGGTTTACGCCATTCTCCTGCCTCAGCCTCCCGTGTAGCTGGACTAACAGGCGCGCGCCACCATGCCCGGCTAATTTTTGTATTTTTAGTAGAGACGGGGTTTCACCGTGTTAGCCAGGATGGTCTCGATCTCTGA
11	56364557	56364558	203	CTAATATATCATAGTACTATATCATAGTACTAATATATCATAGTACTATATCATAGTACTAATATATCATAGTACTATATCATAGTACTAATATATCATAGTACTATATCATAGTACTAATATATCATAGTACTATATCATAGTACTAATATATCATAGTACTATATCATAGTACTAATATATCATAGTACTATATCATAGTAC
11	57967346	57967347	231	TTGTTAAAAATCAAATGATTTTTTAACAAGTGCAGAAACAAAAAGATACTGGTTGCATTGTAACTCATGCAACATCCTTTTTTTAGAAAAGAAAAACACAGATTTGGCCTTCGCACATTTTTTGCAAAGAACAGAAGGTATTTTTTTCTGTAGTGTGATCACAATGAAAACTTTATTGTCAAAAAAAAAAAAAAAAAAAAAAAAAAAAAAAAAAAAAAAGAAAATGGCAAAT
11	5885147	5885148	325	GTGGCCGGGCGCGGTGGCTCACGCCTGTAATCCCAGCACTTTGGGAGGCCGAGGCGGGTGGATCACGAGGTCAGGAGATCGAGACCATCCTGGCTAAAACGGTGAAACCCCGTCTCTACTAAAAAAAAAATACAAAAAAATTAGCCGGGCGTGGTAGCGGGCGCCTGTAGTCCCAGCTACTCGGGAGGCTGAGGCAGGAGAATGGCGTGAACCCGCGGAGGCGGAGCTTGCAGTGAGCCGAGATCGCGCCACTGC
11	5896453	5896454	253	ATGAAAACATTTTCAGAAATTTAATGCAAATTTTAATTGCAACTTTCTCCAAAAGAGAAAAAAATTTTTTCAAAGATACTTGCTAAGAGAACAAAAATAATAGAAATGTTTTAAAAAGAGTAACAAAGTTTTTTCAGTGAATTAAATGTTTTTAAACCATTTCTATTATTTTTGTTTTCTTAGCATATATCTTAAAAATTTTTTTTCTCTCTTGGAGAAAGTTGCAGTTAAAATTTGCATTAAATTTCTGAAAA
11	58977367	58977368	87	AACACACACACACACACACCCCCCCCACATTTCAATAAGTCTTCATTGTTCTGGGTCCTTACCTTTCCTGTCCTCCTGTTATATGAAC
11	59050190	59050191	1373	TAATATATATCTTATATATATGATACGTATCATATATATCTTATATATGATACGTATCATATAATATATATCTTATATATATGATACGTATCATATAATATATATCTTATATATGATACGTATCATATATAATTATATATGATACATATTATATATAATTATATATATCATATATTATATATTTTATATTTTATATATTATATATCTTATATATGATACATATTATATATAATATATATATTATATATCATATAT
11	60758279	60758280	120	GGTCCAATTTATATAAATTTATATATAAATTATATATATATATATAGTAGAGACGGGGTTTCACCACGTTGGCCAGGCTGGTCTTGAACTCCTGACCTCAGGTGATCTGCCCGCCTCAGCC
11	61145202	61145203	309	TCATTCAGTCTTTTTTTTTTTTTTTTTTTTGAGACGGAGTCTCACTCTTTCGCCCAAGCTGGACTGCAGTGGCGCTATCCCGGCTCACTGCAAGCTCCGCCTCTTGGGTTCATGCCATTCTCCTGCCTCAGCCTCCCGAGTAGCTGGATTACAGGCGCCCACCACCACGCCCGGCTAATTTTTTGTATTTTTAGTAGAGACGGGGTTTCACCGTGTTAGCCAGGATGGTCTCGATCTCCTGACCTCGTGATCCGC
11	62153939	62153940	104	TATGTATGATATGTACATATCTATGATATGTATGATATGTACATATCTATGATATGTATGATATGTACATATCTATGATATGTATGATATGTACATATCTATGAT
11	62860002	62860003	92	ATGGTACTGATATATATATATATATATATATATATATATATATATATATATATATATATATATATATATGGAACAGAACAGAGACCTCAGAAA
11	63698908	63698909	308	TGACCTTTTGTACCCTGACCTGGGTTCAAGCAATTCTCTGCCTCAGCCTTCCCAGTAGCTGGGATTACAGGCACCCGCCACCATGCCTGGCTAATGTTTTTGTATTTTTAGTAGAGACAGGGTTTCACCATCTTGGCCAGGCTGGTATTGAACTCCTGATCTCGTGATCCACCCGCCTCAGCCTCCCAAAGTGCTGGATTACAGGCATGAGCCACCACGCCCGGCCTAGAAATTTCTTTTCTTGTCTTGTCTTTT
11	642854	642855	796	TCCCTTCCTCTGACCCTCACCCCGCCTGTCCCTTCCTGTGACCCTCACACCCGCCTGTCCCTTCCTGTGACCCTCAGCCCGCCTGGCCCTTCCTCTGACCCTCACCCCGCCTGTCCCTTCCTCTGACCCTCAGCCCGCCTGGCCCTTCCTCTGACCCTCACCCCGCCTGTCCCTTCCTCTGACCCTCACCCCGCCTGGCCCTTCCTGTGACCCTCACCCCGCCTGTCCCTTCCTCTGACCCTCAGCCCGCCTGGC
11	64320641	64320642	2898	TCATCACCATCACCACTATCACTACCGTCACCACCACCATCATCACCACCATCACCATCACCACAATCACTACAATCACCACCATCATCACCACCATCACCACCACCATCATCACCATCACCACCACCATCACATCACACCATCACCACCACCATCACCATCACCATCACCACCACCATCATCACCATCACCACCCCCATCACCACACACCACCACCATCACCACCACCATCACCATCACCACCACCATCATCAC
11	64349585	64349586	66	CATCACCACCATCTCAATCACCACCATCACCACCATCTCAATCATCACCACCATCTCAATCACCACC
11	64363496	64363497	227	TCCATCCATCCATCCATCCATCCCATCCATCCATCCATCCATTCCATCCATCCATCCATTCCATCCATCCATCCATCCATGCATCCATCCATTCAACTATCCATTCGACCATCCATCCATCCATCCATTCCATCTATTCCAACTATCCATCAATCCATCCATCCATCCCATCCATCCATCAATTCCATTCATCCATCCATTCCATCCATCCATCCATTCAACCATCAA
11	64526486	64526487	76	CCCCCCCGCACAGCCCAGCAGGATGCCAGGACATGTGGAAGCGCCTCCAAGAGCTCCCCAGGAGGGCAAGGCCAAGG
11	66229613	66229614	65	AGGGGAAGGGAAGGTGGGGGAAGGGGAGGCGAGGGGAAGGAGAAGGGGGAAGGGAGGGGAGGAGAG
11	67001013	67001014	1739	CTTGGGAGGCTGAGGCAGGAGAGTCGCTTGAACCCAGTTGGGGTGGAGGTTACAGTGAGCCGACAGAGTGAGACTCCATCTCAAAAAAAAAAAAAAAAAAATTAGCTGGGCATGGTGGCGGCACCTGTAATCCCAGCTACTGGGGAGGCTGAGGCAGAATCTCTTCAACTCGGGAGGTAGAGGTTGCAGTGAGCCAAGATCACGTCATTGCACTCCAGCCTGGGCAACAAGTGCGAAACTCAGTCTCAAAAAAAA
11	67520522	67520523	207	CACATATGTATATATATTACATATATATACATATGTATATATACATATATATACAACATATATACACATATGTATATATACATATATATAACACATGTATATATACACATATGTATCACATATGTATACATACACATATGTATCACATATGTGTATATATACCATATGTATCACATATGTGATATATATACACATATGTATATATACA
11	67522513	67522514	1182	CAACAAGAGTGAAACTCCATCTCAAAAAAAAAAACTAAGCTAAACTAACATAATAAATAATTCGTACACACAAGAGGGATGCCAGCTGAGGGCTGGAGGTGAGGTTTAACTGGGCTCTCTCCAGAGAGAGAAAGAAGCTTAATGCTTCTTTCAAGTAATTTCTGGTCTGTCTTTACCTATGTGGATCCAAGCCAACATTTGAGAAAAGGCCCCTTCAGTGAAGGAATGTGTGACCTTAAGTGCTGAGCGAGAGAA
11	68032154	68032155	695	TAAGTGTGTGGGGTGGGTGGATGGATGGATGGATGGATGGGTGGATGGATGGATGGATGGATGGATGGATGGATGGATGAGTGTATGGGTGGGTGGGTGGGTGGATGGATGGATGGATAGATGGGTGGGTGGATGGATGGATGGTGGATGGATGGATGGATGGATGGGTGGATGGATGGATGGATGGGTGAGTGGGTGGGTGGATGGGTGGGTGGATGGGTGGATGATGGATGGGTGGGTGGTGGGTGGATGGAT
11	68656360	68656361	3013	GCCAGGCTGGTCTTGAACTCCGGACCTCAGGTGATCCACCGCCTCAGCCTCCCAAAGTGCTGGATTACAGGCATGAACCATGACACCCGGCCAACAGCAAGGTCTTGAAGAGACATTTGTACAACCATGTTCGTAGCAGCACTGTTCACAATGGCCAAAAGGTGGAAGCAACCCAAGTGTCCATCCATGGATGGAAGGATCAACAAAATGTGGTCCATCCACACAATGGAATATCATTCAGCCATAGAAAGGAAG
11	68731478	68731479	858	GCATGGCTGGATCCTGGTGTGATCTCACCTCAGGCATGGCTGGATCCTGATGTGATCTCACCTCAGGCATGGCTAGATCCTGGTGTGATCTCACCTCAGGCATGGCTGGATCCTGGTGTGATCTTTTCTCAGGCATGGCTGGATCCTGGTGTGATCTTTTCTCAGGCATGGCTGGATCCTGATGTGATCTCACCTCAGGCATGGCTGGATCCTGGTGTGATCCTTCCTCAGGCATGGCTGGATCCTGGTGTGATC
11	68859870	68859871	52	CCCGGGCTCTCTCCCCTTAGCCTATCCGCCCCTTGCGCCGGTGTGCGTGGCTT
11	68878418	68878419	749	GGATGTTTGGATGGATGGATGGATGGATGGACAGATGGATGTTTGGATGGACGGATGGATGTCTGGATGGATGGATAAATGCTTAGATGGATGGATAGATGGATGGCTGGATGGATGGACGGGTGGACAGATGGACGAACGAATGGATGGATGGACAGATGGACAGATGGATGGATGTTTGGATGGATGCCTGGATGGATGGATGGATGGATGGATGGATGAATGTTTAGATGGATGGATGAAAGAATGGATGGC
11	68892134	68892135	446	CTCCTCCTCCCCCCTCTTCCTCTTCCCCCCACTCCTACCCCTCTTCCCCCTCCTCCCCCTCCTCCCTCCCCCTCCTTCCCCCTCCTCCCCCTCCTCCCCCTCTCCCCCCCTCCTCCCCCTCTCCCCCCTCCTCCCCCTCCTCCCCTCCCCCTCTTCCCTCTCCTCCGCCTTCTCCCCCTCCCCCTCTCCCCCTCTTCCCCCTCCTCCCCCTCTCTCCCCTCCCCCTCTCCCCCTCTTCCTTCTCCTCCCCCTTCT
11	68950406	68950407	3494	CAGTGGCACGATCTCGGCTCACTGCAACCTCTGCCTCCCAGGTTCAAGCGATTCTCCTGCCTCAGCCTCCCAAGTAGCTGAGATTACAGGTGCCCGCCACCATGCCTGGCTAATTTTTGTATATTTTTAGTAGAGATGGGGTTTCACCATGTTGGCCAGGCTGGTCTCGAACTCCTGACCTCAGGTGATCTGCCCATCTTGGCCTCCCAAAGTGCTGGGATTGCAGGCGTGAGCCACCTGTGCCTGGCTGAGAAA
11	68983141	68983142	640	CCATCCGCTTACTCACCCACATGGTCTCCCACCCATTCACCCATTCACCTATTCATCCATCCATCCACCCATGTGTTCATACATACATATATACATATGCCCATCCATCCATACATTTAACCATCCACTCATCCACCACCCACCCATCCATCCACTCATTTATTAACCCATCTATCCATCCATATATCCATTGATTCATATATACATATACCTGTCCATCATCCATCTATCCACATATCCATCCATCTGTAAATT
11	69059458	69059459	498	TGGTAATCATGATAGTGATGGTGATGATGGAAAGGAAATGGTAATGATGATGATGATGATAGTAATAGTGATGAAGGTGAAAGTGATAATGAGATGATGATGGGTAATGGTGGTGATGGTAATTGATGATGATGATTATATGATTATGATGGTGGATGATGATGGTGATAATGATGAGGAGGAGGATGAGGATGATAGTGGTGATGAGAAATGATGGTGGTGATGATGATGATGGTGATGATGGTAGTGATGATG
11	69312945	69312946	306	CCCTCCACCTACACATGCACCCCTCCACCTATACCTGCACCTCTCCACCTACACTTGCACCCCTCCACCTATACCCACACCCCTCCACCTACCACCTATACCTGCAGTCCTCCACCTATACCTGCACCCCTCCACCTATACCTGCACCCCTCCGCCTATACCTGCACCCCTTCACCTATACCTGCACCCCTCTGCCTATACCCGCACCCCTCCACCTATACCTGCAGTCCTCCACCTATACCTGCACCCCTCCGC
11	696773	696774	136	TTTTTTTGTAGAAGGGGGTCTCGCTCTGTCGCCCAGGCTGGAGTGCAGTGGCCTGATCACGGCTTCACTGCAGCCTCTTGGGCTCAAGTGATCCACCAGCGTCAGCCTCCCACGTAGCTCCCCGGGCTAATTTTTAA
11	69690688	69690689	62	GGACCTGCCGTGCATCTGGCCATGTTCTAGAAGCTGGAGCTTCGGGGTGAATGGAGGGGTGAG
11	70649490	70649491	857	CTGGGTGGGTGGGTGGATGGATGGGCAGGCATGCAGGCAGATGAACGATGGATGGACGGATGGATGGAGAGGCAGATGAATTGACGAATGGGTGGACAGGCAGATGGTTGGATGGATGGATGGATGGATGGATGGATGGATGGATGGATGGATAGATGGATAGATAGATGGGTGGATGGGTATATGGGTAGATGGGAAGATGGATGAATGGGTGGGTGGGTGGGTGGATGGATGGATGGATGGTTGGATGGATGG
11	70835269	70835270	491	TTGTCACCATTATCGTCACCATCATCACCACCATCATCACCATCACCTCCACCACATCATCACTATCATAATACCATCATCACCATTATTATCACCATCACCATCATCACCACAATTCTCATAATCACCATTATTATCACCATTATCAACATCACCATCATCACCACCATCCTCATAATCACCACTCTCATCACCACTTACCATCCCCATCACAAACATCATCACCGTTATCACTACCATCATACCATCATTATC
11	7092792	7092793	321	TCTTCTTTTTTTTTTTTTTTTTTTTGAGACGGAGTCTCGCTCTGTCGCCCAGGCCGGACTGCGGACTGCAGTGGCGCAATCTCGGCTCACTGCAAGCTCCGCTTCCCGGGTTCACGCCATTCTCCTGCCTCAGCCTCCCGAGTAGCTGGGACTACAGGCGCCCGCCACCGCGCCCGGCTAATTTTTTGTATTTTTAGTAGAGACGGGGTTTCACCTTGTTAGCCAGGATGGTCTCGATCTCCTGACCTCATGATC
11	71091631	71091632	326	GGTGGATGGAAGGAAGAATGGATGGGTGGAGAGATGGTTGGATGGATGGATGGATAGTGGGGGGTGGGTGATGGAAGGAAGAATGGATGGGTGGAGAGATGGTTGGATGGATGGATGAGTGGGCGGTGGGTGGATGGAAGGAAGAATGGATGGGTGGAGAGATGGTTGGATGGATGGATGAGTGGGTGGGTGTGGTTGGATGGAAGGAGGAATGGATGGGTGAGAGAGATGGTTGGATGGATGGAGGAGAGGGTG
11	71098842	71098843	102	CCTGACTGTTCTGACATTCCAACAGTCCTGACGTGCTGACAGTCACAACATCCCAACAGTCCTGACATTCCAACAGTCCTGATATTCCAACATCCCCGACATC
11	71249578	71249579	57	GGTCATCCTGCTGCCAGTCCAGCTGCTGTAAGCCCTGCTGCTGCTCTTCAGGCTGTGG
11	71912632	71912633	66	CGTATACGTGTATACGTGTATACGTGTATACGTATACATACGTATACGTGTATACGTATACATACGT
11	72312220	72312221	1704	ATGGAGGCTGAGTGAGTGTGTGGGGCTCATTGAGAGGGTGGGGGTAAGTGGGGAATGGGGGCTCAGTGAGGGGATGGAGGCTCAGTGAGAGGATGAGGGCTCAGTGAGGGGATGGGGCTCGGTGAGGGGATGGGGGTTCAATGAGGGGATGGGGGCTGAGTGAGGGGATGGGGGCTGAGTGAGGGGATGGGGGCTGAGTGAGAGGATGGGGGCTGAGTGAGGGGATGGGGCTCAATGAGAGGATGAGGGCTAGGT
11	74064927	74064928	76	CCGCCCGGCAGCCACCCCGTCCGGGGAGGTGGGGGGCGCCTCTGCCCGGCCGCCCCCTCTGGGAGGTGGGGGCCCGT
11	74267463	74267464	70	TTTTCTTTCTTTCTCTGTCGCCCGGGCTGGAATGCAGTGGTGTGATACCAGTTCACTGCAGACTCGACCTC
11	74368012	74368013	92	GAGTGTTGAAGGCTCCAGCTATTATTGCATTGGTGTCTATCTCTCTCTCTTTAGCTCTAATAATATTTTCTTTATATATCTGGGTGCTCCAGC
11	75474481	75474482	311	GTTGTCTCCAATATCACCCAGGTCCCTCCTGTAGGCCAGGCCAGTGTTGGGCCCTGGGACACAGAGAGGACTCTGATTCTACTTGGCCCTCAAGGAGCCTCTCCAGGAAGAATCAGCTGTATAAACACTAAGAGTTTCAGCACCTCTGTGCTAGCATCAGACTTCCAGCTTCCCTCTTTCAGAGCACCTGAAACTCTTAGTGTTTATACAGCTGATTCTTCCTGGAGAGGCTCCTTGAGGGCCAAGTAGAATCAG
11	75881884	75881885	57	GAGCTGCTGGGGCCAGAAGAAAGGACGGGGAATGGCGGGGCGGCGGGGGTGGGGGCAG
11	76330367	76330368	597	TGGCCAGGCAGAGGGGCTCCTCACTTCCCAGTAGGGGCGGCCGGGCAGAGGCGCCCTGACCTCCGGACGGGGTGGCTGGCCGGGCGGGGGGCTGACCCCCCACCTCCCTCCCGGACGGGGCGGCTGGCCGGGCGGGGGGCTGACCCCCCCCACCTCCCTCCTGGACGGGGTGGCTGGCCGGGCAGAGGGGCTCCTCACTTCCCAGTAGGGGCGGCCGGGCAGAGGCGCCCTCACTTCCCAGATGGGGCGGCTGGC
11	76889255	76889256	1797	GGTGGACGGATGGATGGATGGATAGATGGGGGAATAGGTGGGCGGATGGATGGATGGATGGATGGATGGATGGATGGATGGATGGGTGAATAGGTGGGTGGATGGGTGAATGGATGTATGGATGGACAGATGGATGGATAGATGGATGGATAGATGGGTGAATAAGTGGGCAGATGGATGGATGGATGGATAGATGGGTGAATAGGCGGGTGGGTAGGTGGATGGATGGATGGAAGGATGGATGGATGGGTGGAT
11	76903962	76903963	104	CCTCCCCACCATCAACACCATCACCACCTCCACCATCACCAACAACACCATCGCTACCTCCACCATCACCAACAGCATCACTACCTCCACCATCACAAACAACTA
11	78516324	78516325	64	CCCCACCCTCCACACCCCACCCCTCATTCTTCCCCACCCCCACTCCTCCTCCACCCACCCTTCCT
11	82354770	82354771	797	AGGATTTGTTTATCTTTTCATCCCCAAATCTGCTAAATTGTAGGCATTCAATAAATACTTGTTGACTGAATAGCACCCTTGCTGATGTTCTAGCTTATGTTTTGTTATATTTCTATATCTCTCATGGAATTTACCATTTCAGAGAAGTAAACTAACTTGCCCGTGGTCATCCAGCTAGTAAGTTGCACTGCAGTAATACAATCCTGTGCCTATATGAGCCAGAGACTATTTCATAGAAGTAAACTAAGTTCCCTG
11	833824	833825	71	GGGGTGTGCGTCTGCCACCGATGGGGGGGGTGTGCGTCTGCCACCGATGGGGGGATGTGTGTCTGCCACCGA
11	83660456	83660457	294	TAAGAATTGTTGCTCCTCACTTTGGGAGGCCGAGGCGGGCGGATCACGAGGTCAGGAGATCGAGACCATCCCGGCTAAAACGGTGAAACCCCGTCTCTACTAAAAATACAAAAAATTAGCCGGGCGTAGTGGCGGGCGCCTGTAGTCCCAGCTACTTGGGAGGCTGAGGCAGGAGAATGGCGTGAACCCGGGAGGCGGAGCTTGCAGTGAGCCGAGATCCCGCCACTGCACTCCAGCCTGGGCGACAGAGCGAGA
11	84565273	84565274	61	GTCTTCTAGTATTTTCATTTTATTTTACTCTTGAAGTTGATTTGTCCCAATAAACATATGTT
11	85983100	85983101	904	TTTTTTTTTTTTTTTTTTTTTTGAGACAGAGTCTTGCTCTGTTGTGCATGCTGGAGTGCAGTGGTGCAGTCTTAGCTCACTGCAGCCCCCACCTCCTGGGTTCAAGTGATTCTCTTGCCTCAGCCTCCTGAGTAGCTGGGATTACAGGCGTGCCCCACGCCCAGCTTGTATTCTTTAGTAGAGGTGGAGTTTCGCCATGTTGGCTAGGCTGGTCTCAAACTCCTGACCTCAAGTGATCCGCCTGCCTTGGCCTCC
11	86397479	86397480	621	ATGTGTATATATATACACATATATGTGTGTATATATGTGTATATATACACACACACACATATATATATATACATATATGTATGTGTGTATATATATATATACACATATACACACATGTATATCTCTAGTATTAAGGTCTGGTTTCTTTCAATTATATATATATATATATATATATATATATATAATATATATATATATATAATTTGTTTATTGAGACAGAGTCACTCTGTTGCCCACTGGAGTGCAGTGGTGTGA
11	86979229	86979230	100	GAAAGAAAAGAAGAAAGAAAAGAAAAGAAAAGAAAAGAAAAGAAAAGAAAAGAAAAGAAAAGAAAGAAAAGAAAAGAAAAGAAAAGAAAAGAAAGAAAAGA
11	87166483	87166484	568	GATCCTTCTTCGGCTTCTCTTCTTTGGCTCCTGGGCCAGATGTGTATGTTTAGCTCCAGGAGGAAGTGTACTTGCTTCTGCGGGACACTCACACCACCAAGATCAGAATAAAAAGAAAACTGGCCATCCTCGTGGTTTCCAACTTAGTCTTGCTCTCCCCTGCTTTACATCCATCTTCCCTCCTTGACTTCCTCCTCTCAGGACTGCACAGGCCAGCATCAGATGTGATGATAATCAGCTCCCACAACTGTATAA
11	8839647	8839648	2186	TTTTTATTTTTTATTTATTTTTTATTTTTTATTTTTTATTTTTTTTATTGATCATTCTTGGGTGTTTCTCGCAGAGGGGGATTTGGCAGGGTCATAGGACAATAGGTGGAGGAAGGTCAGTAGATAAACAAGTGAACAAAGGTCTCTGGTTTTCCTAGGCAGAGGACCCTGCGGCCTTCCGCAGTGTTTGTGTCCCTGGGTACTTAAGATTAGGGAGTGGTGATGACTCTTAACGAGCATGCTGCCTTCAAGCAT
11	8887318	8887319	317	AGAGATTTAATCTCTCTTTTTTTTTTTTTTTTTTTTTTGAGACAGAGTCTCGCTCTGTCGCCCAGGCTGGAGTGCAGTGGCACAATCTCGGCTCACTGCAAGCTCCGCTTCCCAGGTTCACGCCATTCTCCTGCCTCAGCCTCCCGAGTAGCTGGGACTACAGGCGCCCGCCACCGCGCCCGGCTAATTTTTTGTATTTTTAGTAGAGACGGGGTTTCACCTTGTTAGCCAGGATGGTCTCGATCTCCTGACCTC
11	88908962	88908963	328	GAAAGTAACTTAGAAAGTCTTCATCAGGCCGGGCGCGGTGGCTCACGCCTGTAATCCCAGCACTTTGGGAGGCCGAGGCGGGCGGATCACGAGGTCAGGAGATCGAGACCATCCCGGCTAAAAAAACGGTGAAACCCCGTCTCTACTAAAAATACAAAAAAAATTAGCCGGGCGTAGTGGCGGGCGCCTGTAGTCCCAGCTACTTGGGAGGCTGAGGCAGGAGAATGGCGTGAACCCGGGAGGCGGAGCTTGCAG
11	89026887	89026888	86	TTTATATATATATATACAGATATATATATATATATATACAGATATAGATGATAGATAGATAGATAGATAGATAGATAGATAGATAGA
11	90000501	90000502	187	TGTGCTGGTTTTCAGAGGGAATGCTTCCAGTTTTTGCCCATCCAGTATGATATTGACTTTGGGTTTGTTATAAATAGCTCTTATTATTTTGAGATACATTCCATCAATAACTAGTTTATTGAGAGTTTTTAGCATGAAGGGACGTTGAATTTTTGTCGACGGCTTTTTCTGCATCTATTGAAATAATC
11	90761463	90761464	54	TAAGAATATGCGACAGAGCGAGACTCCGTCTCAAAAAAAAAAAAAAAAAAAAAAA
11	90880319	90880320	58	ATATACATACATATATGTATATACACACATATATACATACATATATGTATATACACACA
11	90880419	90880420	191	ACATACATATATGTATATATACATGTATATATGTATATATACATACATATATGTATATATACATGTATATATGTATATATACATACATATATGTATATATACATGTATATATATACATATATATGTAATATACATGTATATATGTATATATACATACATATATTTATATATACATGTATATATGTATATATA
11	91153581	91153582	165	TTTTTTTTTTTTTTTTTTGATACGGAGCCTCGCTCTGTCGCCCAGGCTGGAGTGCAGTGGTGCGATCTCCGCTCACTGCAAGCTCCGCCTCCCGGGTTCATGCCATTCCCCTGCCTCAGCCTCCTGAGTAGCTGGGACTACAGGTGCCCGCCACCACGCCCAGCTA
11	92062906	92062907	4132	TTTTTGGCATTCAGCAACAGCTTCTCTTTTGCAACCTGTTCAGAACTCCTTGCATGAAGCTCCCAGGCTATCACAAAAGAGCTGGTGCTTGTGCAACCATTACCCTCTGTTTACTGTCTCAGACAAGAAACAAAGAAAGATAGGCGCCCAGCAACAGAAGTGTAGCAGGAAGAATTTAGGTTGGCCCCCAACTTTCAGAAGCTGAGGTTAAAACAAGTTAGCTAACAGAGGCAGTTTTCTTTCAGCAACTCCTTG
11	92438811	92438812	1698	AGTGATGGTGTGGTGATGGTGGGTGATGGTAGTGTGTGATGGTGGTGGTGATGGTGGGTGGTGGTGTGATGGTGGTGGTGATGGTGGTGGTGGTTATGGTGGTGGTGGTGGTGAAGGTGTGGTGTGTTGGTGGTGGTGTGATGGTGGTGTGGTGGGTGGTGTGATGGTGACGTGATGGTGGTGGTGGTGATGGTGGTGGTGTGATGGTGGTGGTGGGTGATGGTGGTGATGGTGGTGGTGTGATGGTGGTGGTGG
11	92608490	92608491	313	AGGGCCGGGCGCGGTGGCTCACGCCTGTAATCCCAGCACTTTGGAGGCCGAGGCGGGCGGATCACGAGGTCAGGAGATCGAGACCATCCTGGCTAACACGGTGAAACCCCGTCTCTACTAAAAATACAAAAAAATTAGCCGGGCGTGGTAGCGGGCGCCTGTAGTCCCAGCTACTCGGGAGGCTGAGGCAGGAGAATGGCGTGAACCCGGGAGGCGGAGCTTGCAGTGAGCCGAGATCGCGCCACTGCACACTCA
11	93354730	93354731	52	GGTGGGAGGTGATTGGATCATGGGGGTGGATATCACCCTTGCTGTTCTTGTGA
11	93871034	93871035	110	AAAACTTTTTAAAAGTTACTGTATATATATATATATATATATATATATATATATATATATATATATATATATATATATATATATCTATCCTGGGGGAAAACAGACCAAGAT
11	94828594	94828595	66	AAAGCAGTCACTCACAATTTCTTCCTTACTGTGATGCACACAGCAAAACAGGGACCACACATGCTAT
11	95823131	95823132	846	CATTGGTGTGCTTGGGTCCTAGAAACTCGGGTGGGGACTAAGAGGTCAGGAATATGGTTTATAGTTGCTGATATCAGCAGTATGTCCGGAAACAGACCAGAGGATGTTGGAGGTGGCAGGGAGGCTCCCAGAAAAGGACTGATGGGGCACCAAAGATATATGTTTCTACGTGGTGGCTCGTGCCTGTAATCCCAGCACTTTGGGAGGCCGAGGAGGGCGGATCACTAGCTCAGGAATTCTAGACCAGCATGGCCA
11	96602297	96602298	111	TATTTACTATATTACATATAGTAAATATATATAGCTAATATTTACTATATTACATATAGTAAATATATAGCTATATATTTACTATATTACATATAGTAAATATTAGCTATAT
11	96665926	96665927	560	TCAAGGTGCAAAATAAAATCTCTTCTAAGGAAGAACTATATGTCACAGTGGTACAGAACAAATCTGATTACATGGGTAGCAGAGGAGCCATTTCTGGAATAGTGTGGTAGAGTTAATACTTCTCAGAACTTTTTTTTTGCAGAGAAGAAAATATTTATTTTAAAACTTTATTTGGATATATGTAATATAAGTTGTAAAAATAGTAGTAAGTAAATCTTTATAAGTCACCATTCTAAGGTAATCCAGCATGAGACT
11	97434305	97434306	1129	AGGCGTGGGCAAGGACTTCATGTCCAAAACACCAAAAGCAATGGCAACAAAAGACAAAATTGACAAATGGGATCTAATTAAACTAAAGAGCTTCTGCACAGCAAAAGAAACTACCATCAGAGTGAACAGGCAACCTACAACATGGGAGAAAATTTTTGCAACCTACTCATCTGACAAAGGGCTAATATCCAGAATCTACAATGAACTCAAACAAATTTACAAGAAAAAAAACAAACACCCCATCAAAAAGTGGGC
11	97465812	97465813	89	GATATATATCAGTGTGATATATGTGATATATATCAATGTGATATATATCAATGTGATATATGTGATATATATCAATGTGATATATGTGAT
11	97704650	97704651	79	AGAGGAGAGGAGGGAGGGGAGGGGACGGGAGGATGGAGGATGGGAGAGGGTAGGCGAGGGGAGGGGAGGGGAGGGGAGGG
11	97754964	97754965	92	CCATAACAAGTGTTTCAAGAATAATAAAAAGCCCATAAACAAGTGTTTCAAGAATAAATTGAAGAAAACCAAGAGCATTTGGAGTTATAAAAG
11	98774702	98774703	322	GGGCCGGGCGCGGTGGCTCACGCCTGTAATCCCAGCACTTTGGGAGGCCGAGGCGGGCGGATCACGAGGTCAGGAGATCGAGACCATCCTGGCTAACACGGTGAAACCCCGTCTCTACTAAAAAATCAAAAAATTAGCCGGGCGTGGTAGCGGGCGCCTGTAGTCCCAGCTACTCGGGAGGCTGAGGCAGGAGAATGGCGTGAACCCGGGAGGCGGAGCTTGCAGTGAGCCGAGATCGCGCCACTGCACTCGAGC
11	99432455	99432456	82	CCGGTCTAATCATTAGAGAAATATGAAGAGATATTTTCTAAGGGATATTTATTAAAAGAAAAGAAGCCTTGACTAGTACTCCT
11	99690185	99690186	1660	TTAGTAATGTCTTCAAAGAAACAATCTTTATAAGAAAAAAATAAACTAGTTTCCTCAAAATTCAGATTTTATTATATATTTTTTCTCTTACAGAGTATTCAAAAGCTCTTCCTGGTCTCTCCACTTCATATGCTGCTTTGTTAAGAATTAAGAAGAGTTCATCTTCATCTCTCTTTGGTTCCAAAACCAGACCATGATACAGCAGCCCTTCATTAGGAACACTGAGTGCTTCTTCACCCAGCTGGCGAGGGCAGC
12	10234200	10234201	320	TTTTTTTTTTTTTTTTTTTTTTTTTGAGACGGAGTCTCACTCTGTCGCCCAGGCTGGAGTGCAGTGGCGCGATCTCGGGCTCACTGCAAGCTCCGCCTCCCAGGTTCACGCCATTCTCCTGCCTCAGCCTCCCGAGTAGCTGGGACTACAGGCGCCGCTACCACGCCCGGCTAATTTTTTTTTGTATTTTTAGTAGAGACGGGGTTTCACCGTGTTAGCCAGGATGGTCTCGATCTCCTGACCTCGTGATCCGCC
12	103954157	103954158	55	GGGCACACACATGGGGCAAGAGACAGTGGATGCAAGATCAGCTTGCTAGCCAAGTG
12	10445757	10445758	80	ATATTAGCAATAAGGCTGATATATATATATATATATATGTGTATATATATATATATATATATATATACATATATATATATA
12	105830902	105830903	326	AATGATCCCAGCACTTTGGGAGGCCGAGGCGGGCGGATCACGAGGTCAGGAGATCGAGACCATCCTGGCTAACACGGTGAAACCCCGTCTCTACTAAAAATACAAAAAATTAGCCGGGCGTGGTGGCGGGCGCGCCTGTGGTCCCAGCTACTCGGGAGGCTGAGACAGGAGAATGGCGTGAACCCGGGAGGCGGAGCTTGCAGTGAGCCGAGATCGCGCCACTGCACTCCAGCCTGGGCGACAGAGCGAGACTCC
12	107675354	107675355	4204	GTTTTTTTTTTTTTTTTTTTTTTTTTTTTTTTTTTTTTTTTTTTGGGGAATACATTGTATTCATTTATTCTCCTTATACATAAAATTTGTGCTTTGAAATGTCTTCAGGAAGATGCCACTCTGGGGTGGAAAATGGGGAATGACAAGAAATGCAGTCGGCAGGTTCTATTCGTACATGTTCAGTCTCTTCCTCCCCTTCTTTGCCCACACTTGTTAGATGCAACTCAATCTTTTTTCTAGGGAAAAGGAAACCAT
12	108308068	108308069	3937	GCCAGAATGTGGGGACAATTATACAATTAAGTGTCTCAGCACATTGTACGTAAGGGGAGGCTCACTCGAGTGAGAATAAAGTTCTGACTGGTAAAGAAGCAGCAGCCACCCAGCCCTCCACAAGGAACAAAGATATTGGAATTTTGGAAGCTGCACAGGAACCTTGTTTTTATTTCACATTTATCACAGTCTCAGAGTACCTTGTCTAATGTTGATGTTCCGTGAGGTTACTTATCTCCAATAAAGCGACAATGA
12	108972380	108972381	4263	CCACCACACCACCACCATCACCATCACCATCAACCACCACCACCACCACCACCACCACCACCATCACCACACCATCACCACACATCACCATCACCACCATCACCATCACCACCCATCCATCACCACCCCCATTATCACCACCCCCATTATTACCACCACCACCATCATACCCACCCCATTATCACCACCCTATCAACACCACCACCACACCATCCCCATCACCACCACCACACCACCACCATCACCATCACCACC
12	110099405	110099406	648	TGGTGTTAGGAATGGTGGCAATAGTAATAGTGGTAGGAATGGTGGTAATAGCAATAGTGGTGGTAGGAATGGTGGTAATGGTAATAGTGGTGGTAGGAATGGTGGTAATGGTAATAGTGGTAGGAATGGTGGTAATAGTAATAGTGGTGGTAGTTATAATGGCGGTAGGAATGGTAGTAATAGTAAGAGGGGTAATAGGAATGGTGATAATAGTAATAGTGGTGGTAGGAATGGTGGTAATAGTAATAGTGGTAG
12	110099836	110099837	90	TAATAGTGGTGGTAGGAATGGTGGTAATAGTAATAGCGGTGGTAGGAATGGTGGTAATGGTAATAGTGGTGGTAGGAATGGTGGTAATAGT
12	110616616	110616617	1876	AACCCCATCTCTACTAAAAATACAAAAATCAGCCAGGTGTGGTTCTCCTGCCTCATCTTCCTGAGTAGCTGGGATTACAGGTGAGCGCGACCATGCCAGGCTGATTTTTGTATTTTTAGTAGAGATGGGGTTTCACCATGTTGGCCAGGATACAACGTAGAGTTGCTTAGAGCAAGATACTTGCAGGTCCTGCCCTCATCAAGCTTAAGGAACAGTGGGGAAAACAAATATTGAACTGAAGTTTAAGATGATGGC
12	111318496	111318497	896	ACCATGACCACCATCACCATCATCACCACCACCACCATTACCATTACCACTATCATCATCACCATTATCACCATCACTACCGATTACCATCATCACTGTCACCATAACATCCTCACCACCATCACCATTATCACCACTATCATCACTATTACCATCATCACGCATCAATCACTGCCACCACCATCACCATCATCACCACCACCATCACCACCACCATTACCACTATCACCATCACCACTATCATCACCATCACTA
12	11179038	11179039	310	AGCCTGTAATCCCAGCACTTTGGGAGGCCGAGGCGGGCGGATCACGAGGTCAGGAGATCGAGACCATCCTGGCTAACATGGTGAAACCCCGTCTCTACTAAAAAAAAAAAAATACAAAAAATTAGCCGGGCGTGGTAGCGGGCGCCTGTAGTCCCAGCTACTCCGGAGGCTGAGGCAGGAGAATGGCGTGAACCCGGGAGGCGGAGCTTGCAGTGAGCCGAGATCGCGCCACTGCACTCCAGCCTGGGCGACAGA
12	11207687	11207688	1857	ACTTAAAACTTTAAAAAATATTAGAAAAACGAATAAAGGAAAATGAATACATATATAAAATATATAATTCATTATTAATAAATGTGCATAAAATCACACTCATAGAATTTAAAAAGAGTAACAATTTTTGAATTAAGGTTACATTCTAAATTATAATAGAAAAAGGCTTATAAAATGTTAGTTTTAATAATACTTTATGTAAATATTATTGAGTTTCCTGCTTCATACATGTCCCTGCAAAGGACATGATCTCAT
12	11219193	11219194	198	ATAGCATTAGGAGATATACCTAATGCTAAATGACGAGTTAATGGGTGCAGCACACCAGCATGGCACATGTATACATATGTAACTAACCGGCACATTGTGCACATGTAACCCTAAAACTTAAAGTATAATAATAATAAAGAAATAAAAAATAAAAAAAATAAAAAAACACAAAAAAAGAAAAGTTAATTTAAAAAATACG
12	113529419	113529420	160	CCCAGGGCACACACCATCCACACAGATCCACAGATCCAAATATACACACATGCATGGAGAAGACACACACAGACTTATCATACTCCCGGGACACATTACACACACATGTTTAAGTACACAGACACACAAACACACACAACCCAGGGAGTACATCACAGATA
12	115221992	115221993	303	AAGGCCGGGCGCGGTGGCTCACGCCTGTAATCCCAGCACTTTGGGAGGCCGAGGCGGGCGATCACGAGGTCAGGAGATCGAGACCATCCCGCTAAAACGGTGAAACCCGTCTCTACTAAAATACAAAAAAATTAAGCCGGGCGTAGTGCGGGCGCCTGTAGTCCCAGCTACTTGGGAGGCTGAGGCAGGAGAATGGCGTGAACCCGGGAGGCGGAGCTTGCAGTGAGCCGAGATCCGCCACTGCACTCCAGCCTG
12	115343905	115343906	186	TCAGGCCTGGCTTGTGATGGCAGAGGGTATAGGTTATGGTGGCTTTTCATGAGAATATTGCCTCATCCCTCATTGGTGGTTTGTCCTTCCATGTTGAAGTCTATGGTCCCACTCATGTATGGCCTTCAGCCTCCACAGTGATCACTTACTCAGGGAATAGTTAGAGGGCAGGCAATATCCCAACATC
12	115550513	115550514	109	GGGGGAAGGCCATGTGAAGACAGAGGCAGGTGCTAGAGTGATGTGTCTCCAGGCCAAGGCGGGCTGATTGCTGGCTACTATCCGAAGGAGATTGGAGACACAGACACACA
12	118732946	118732947	983	TTGAACCCAGGAGGTGGAGGTTTGCAGTGAGCCAAGATTGCACCACTGCATTCCAGCCTGGCAACAGAGCGAGACTCCCTCTCAAAAAAAAAAAAAAAATGCAAGTAGATAACTTTTTATGCCTCATTCAAAAGCTAATCCTTTATTGGTACACTGGCTCCCACCCTCTCACGTCCACTCAAGGACATTGCTTCAGCAATTCTGCCTTCTCTCCTACACCAATTTTTCTTCCTGCTGGATCACTCCTATCAGCCT
12	120201095	120201096	112	CCATGGAAAGACATATGGGAAAACAACCCAGAAATGACCTCAAAGTGTTCTCCTGTGACCCCTGGTACTTCAATTGTTAGAAAATTATGAGAATGTACACAGTAGTCCCCTGG
12	120875090	120875091	793	TGAGTAGCTGGGATTACAGGCACGCACCACCACGCCCAGCAAATTCTTTTGTATTTTTAGTAGAGACGGTGTTTCACCATGTTAGCCAGGCTGGTCTCAAACTCTTGACCTCAGGTGATCTGTCTGCCTCGGCCTCCAAAATAGTGGGATGACAGGCATGAGCCACCGTACCCGGCCAACATTCTCATCTTTTGACCTCTGGTCACACTGGCTTTCTCTTCCTTGAAATTGTGGAAACAAAAATTGACATCTGGC
12	120879978	120879979	593	TGTCTCTACTAAAAACACAAAAAATTAGCCCAGCGTGGTGGCACGTGCCTGTAGTCCCAGCTATTCGGGAGGCTGAGGCAGGAGAATCGCTTCAACCTGGGAGAAGGTTGCAGTGAACTGAGATCATGCCACTGCACTGTACCCTGGGCAACAGAGTGAGACTCCATCTCAAAAAAAAATAAAAAAGTTTTTTTTTTTTTTTGAGACGGAGTCTCCTCTGTCACCAGGCTGGAGTGCAGTGGAGCGATCTGAGCT
12	120905800	120905801	670	TTCAGCGTCCTGAGTAGCTGGGATTATAGGCATGCGCCACCACGCCTGGCTAATTTTTTTGTATTTTTAGTAGAGACGGGGTTTCTCCTTGTTGGTCAGGCTGGTCTCGAATTCCCGACCTGAGGTGATCCGCCCCGCCTCAGCCTCCCAAAATGCTAGGATTACAGGCGTGAGCCACCTCACCCGGCCTGTATGGTTAACCAGATTTTACAGATCAGGATATTGAGGATTTAGAGTTACTGATAGAAAGCTAGT
12	121490572	121490573	1008	ATCCAGCACTTCGGGGGGCCGAGGCGGGCAGATCACTTGAGGTGAGGATTTCGAGACCAGCCTGACCAATATGGTGAAACCCCGTCTCTACTAAAAATACAGAAAATTAGCTGGGCCTGGTGGTGGGTGCCTATAATTCCAGCTACTCGGGTGGCTGAGGCAGGAGAATCACTTGAACCAGAGAGGTGGAGGCGGAGGTTGCAGTGAGCTGAGATCGCGCCACTGTATTCCAGCCTGGATGACAGACTGAGGCTC
12	121568650	121568651	53	CTTTCTCTTTCTTTCTTTCTTTCTTTCTTTCTTTCTTTCTTTCTTTCTTTTCTT
12	122319733	122319734	199	TTTTTTTTTTTTTTTTTTTTTTTTTTTTTTTTTTTTTTTTGAGACGGAGTCTCGCTCTGTCGCCAGGCTGGAGTGCAGTGGCGGGATCTCGGCGCTCACTGCAAGCTCCGCCTCCCGGGTTCACGCCATTCTCCCGCTCAGCCTCCAAGTAGCTGGACTACAGGCGCCCGCCACTACGCCCGCTAATTTTTTGTATTTTT
12	1230847	1230848	178	TAGAGATAGAGACACAGATAGAGATAGAGATAGAGATAGAGACACAGATAGAGATAGAGATAGAGATAGAGACACAGATAGAGATAGAGATAGAGATAGAGATAGAGATAGAGACACACAGATAGAGATAGAGATAGAGATAGAGATAGAGATAGAGACACAGATAGAGATAGAGATAG
12	1231809	1231810	178	TTTAGATAGATATATACAGATATATCAATAGGCACAGATAGAGATAGAGATAGAGATAGAGATAGAGATAGAGATAGATATATATACAGATATATCAATAGGCACAGATAGAGATAGAGATAAGAGATTTAGATAGATATATACAGATATATCAATAGACACAGATAGAGATAGAGATA
12	123386955	123386956	1314	AGAGACAGGGTTTTTCCATGTTGCCCAGGCTGATCTTGAACTCCTGGGCTCAAGAGATCCTCCCACCTTTGCCTCCCAAAGTGCCAAGATCACGCCACTGTAACCGAGATCTACCTTCCGGGTTCAAGAGATTCTTATGCCTCAGCCTTCCGAGTAGCTGGGACCACAGGTGCACACCACCATGCCTAGCTAATTTTTAATTTTTTTGTAGAGATGGGGTTTCACTATGTTGGCCTGGCTGCTATTTTTTTTTTT
12	123960722	123960723	66	AGCCACCGCACCTGGCCTCAAAAATTTTTTTACAAATAGCCAGGTGCAGTGGCTCACACCTGTAATC
12	124719487	124719488	186	CTCCATCATCATCACCATTACCACCATAATCATCATCATCAATACCACCACCACCATCACCACCATCACCATCATTAACACCATCATCACCACCATCACCATCACCACCACCATCATCACCATCACTGTCACCACCACCATCATCACCACCACCATCACCATCATCACCATCACCATCACCATCATC
12	124818404	124818405	142	CACATGCACACCCGCACACATGCGCACCCGCACACACACACACGTGCACACCCACACACATGCGCGCGCACACACATGCACACCCGCACACATGCGCGCACACACACACACATGCGCACCCGCACACATGCGCACACACACAC
12	124863580	124863581	55	AGGGCAGCACTCAGAGGGTCGCGCGCGGGTGAAACGGGGTGGGACAAGGAGCAAAA
12	125156181	125156182	74	ATGTACCTGGACACACACACACACATTCATCCTAATACACACATGTACCTGCACACTCATCCTAATACACACATG
12	125484421	125484422	2461	GGCTGAGTTGGGAGAATCACGAGGTCGCAAGTTCCAGACCAGCCTGGCCAACATGGTGAAAAACTCTCCTAAAAATACAAAAATTAGCCGGGCGTGGTGGCACATGTCTGTAATCCCAGCTACTTGGGAGGATGAGGCAGGAGAATCACTTCAACACGGGAGGCGGAGGTTGCAGTGAGCCGAGATCGCGCCACTGCACTCCAGCCTGGGCGACAGAGCAAGACTCGGTCTCAAAAAAAAAAAAAAAAAAAAATT
12	125574756	125574757	152	TCCATACATTCATCTATCTTCCACCCATCATCTACCCTCCACCCATCATCTACCCATTCATCCATCCATCCTCCATTCATCATCCCTCATCCATCATTTATCCAACTATCCATCCATCTGTCTACACATTCTTCTCTCCACCTACCCATCCAT
12	125792276	125792277	96	TTATACTTGTAATATAAGTATATATATGTTATATAAGTATATATATACTTGCAATATAAGTATATATACTTGTAATATACTTGTATTATAAGTATAT
12	127316691	127316692	1945	AGAATGAGGACAAGGAGGAGGAGAAGGAGGAGGAGGAGAAGGAGGAGGAGGAGAAAGAGGAGGAGGAGAAGGAGGAGGAGGAGAAGGAGGAGGAGGAGAAAGAGGAGGAGGAGAAGGAGGAAGAGGAGAAGGAGGAGGAGAAGGAGGAGGAGAAGCAGGAGGAGGAGAAGGAGGAGGAGGAGAAGGAGGAGGAGGAGGAGGAGGAGGAGGAGGAGGAAGAAGGAAGAAGAAGAGGAGGAGAAGAAGGAGAAGGAG
12	127413233	127413234	638	TTTTGTTATATATATGTATTTATGTATATGTGTATATGTATATTTACATATTTGTATATTTATATTTACATATACATATTTATATTTATATATACATATACACATGTATGTGTATTTATGTACACATACATATTTATGCATACACAAATATGTATATTTATATTTACATATACATATTTATATTTACATATACATATACACATATAGATGTTTATCAGTTATTGAGCGCTTAAATATATATCAGAAATCTTGCAT
12	127714293	127714294	367	TATATGTATATATACATATATATATGTATATATATACATATACATATACACATATATATATATATGCACACATATATACACAAGCACATTTTGGATCACTTGCTTATCTTTGTGCAGATTCTTCTAATGCCCCTGGTATCTATATCTCCTCCTTCTTGAGTATGTGGCCAGATCACACTTCCCTGACACTCACTGAAGCCTCATAACTAGTTCTCCCCAGTGGAATGTAAGCAGAGATGATGAGTGACACCTCTT
12	127967063	127967064	53	GAGATCGGCAGAGGTGAAGGGTTGATGGATGGGGTATTGTTTTTCCAATTGAGG
12	12806274	12806275	4374	CGTGCTGGGATTACAGGCGTGAGCCACCATGCCCAACCCTTATTGTTTTAATGTACATTTCTTTATGAGTGAGGTTGAATAGCTTTTTATATTTAAAAGCAACTCTTTTTTTCATGTCTTTTGCCTGTTTTCATAGTGAATTGTATATCAGTTAGGTCGCTTTTGATTTTAAGTGACAGACCCAAATTGACAAAAGAATGAACTGCTCCCCTAACTAAAAATTGTGGGAGTAGAACTTCAGGCATAACTGTATTT
12	128181611	128181612	483	GGTGGTGGTGATAGTGGTGATGATGATGGTAGTGGTGATAATGGAGGTGATGATGATGGTGGTGGTGGTGATAGTGGAGGTGATGATGGTGATGGTGGTGGTGATAGTGGTGATGATGATGGTGGTGGTGATAATGGAGGTGATGATGGTGGTGGTGGTGATAGTGGAGGTAATGGTGGTGACAATGGAGGTGATGATCGTGGTGGTGGTGATACTGAAAGTGATGATGATGTTAGAGGTGATCACGCAGGTGAT
12	128391067	128391068	119	ATATATATAATATTGCATTATTAGTTTAAAAAGTTCTTTAAAGAAAAGTCCAGTTCCAAATGGTTTAACCGTTGAATTCTACCAAATATTTAAGAAAGACACGATACTAATTTTACAAAT
12	128425050	128425051	76	CCCGTTCTTTGTTCGGGCAGTGGTGAGGCTAACTCCAGGTGACTGGCAGTCTTACTCCCCTTTTGTCAGGTTGTCTT
12	128869773	128869774	56	ACATAATCGCCGAGTCCTCGCACAGAGCCTGATAGGATCATTGCAAATATTTGAGAC
12	128957889	128957890	709	AGGAGGCTGGCATGCAGATGAAGGAGGCTGGCGTGAGGATGAAGATAGAGGCTGGAGTGAAGATGAAGACGGAGGCTGGAGTGAGGATGAAGATGGAGGCTGGAGTGAGGATGAAGAGAGAGGCTGGAGTGAAGATGAAGACGGAGGCTGGAGTGAAGATGAAGATGGAGGCTGGAGTGAGGATGAAGATGGAGGCTGGAGTGAGGATGAAGAGAGAGGCTGGAGTGAAGATGAAGATGGAGGCTGGAGTGAAGA
12	129192711	129192712	178	AAGATCCACTGTCATCCACACCAGTATCCAAAATCAATGAGCAGGAGGGCGTTCATTCATAGACTCACCATCATCCACACCAGTGCTCAAAGTCAGCAAGCAGGAGGGCGTTCATTCATAGACTCACCATCATCCACACCAGTACTCAAAGTCAGCAAGCAGGAGGGCGTTCATTCATA
12	129192910	129192911	178	GTGCCCAAAGTCAGAGAGCAGGAGGGCCTTCATTCATAGACCCACCATCTTCCACACCAGCGTTCAGAGTCAGTGAGGAGAAGGGTGTTCATTCATAGATCCACCGTCATCCACACCGGTGCTCAAACTCAGCAAGCAGGAGAGGCGTTCATTCATACACTCACCATCATCCACACCAG
12	129193112	129193113	237	GGCGTTCATTCATACACTCACCATCATCCACACCAGTGCTCAAAGTCAGCAAGCAGGAGGGCGTTCATTCATACACTCACCATCATCCACACCAGTGCTCAAAGTCAGCAAGCAGGAGGGCGTTCATTCATAGACTCACCATCATCCACACCAGTGCTCAAAGTCAGCAAGCAGGAGGGCGTTCATTCATACACTCACCATCATCCACACCAGTGCTCAAAGTCAGCAAGCAGGAGGG
12	129298796	129298797	102	CACCGTAATGATGGACCTGACCGCTGTATGATGGACCTGAGCGCCGTATGATGGACCTGACCGCTGTATGATGGACCTGACCGCCGTATGATGGACCTGACGC
12	129650871	129650872	68	TTTCGTCTCCGGCTACTGTTTGACATACATGAATGTGGGCGGATCTCCGTCTAAAGGGCCACGTATGTT
12	129883960	129883961	78	CCACTCCCACAAAAACCAACTACTTCTTCAATAGCTTATCCACTCCCATGATAACCAACCCACTCCTGCAATAGCTAAC
12	130023449	130023450	719	GTCACTAGTAGCCAACGCTCCTTCTGACCCTATCGCCAGGGGTCACTAGTAGCCAACGCTCCTTCTGACCTATCGCCAGGGGTCACTAGTAGCCAACGCTCCTTCTGACCTATCGCCAGGGGTCACTAGTAGCCAACGCTCCTTCTGACCTATCGCCAGGGGTCACTAGTAGCCAACGCTCCTTCTGACCTATCGCCAGGGGTCCCTAGTAGCCAACGCTCCTTCTGACCTATCGCCAGGGGTCCCTAGTAGCCA
12	130231759	130231760	54	AGGAGTAAGAAGGAGAGGGAGGAGGGAGAAGGAGCGGGAGGAGGGAGAAGGAGCG
12	130455055	130455056	315	CGGCCGGGCGCGGTGGCTTCACGCCTGTAATCCCAGCACTTTGGAGGCCGAGGCGGGCGGATCACAAGGTCAGGAGATCGAGACGCATCCCGGCTAAAACGGTGAAACCCCGTCTCTACTAAAAAAAAAAAAAAAAAAATTAGCCGGGCGTAGTGGCGGGCGCCTGTAGTCCCAGCTACTTGGGAGGCTGAGGCAGGAGAATGGCGTGAACCCCGGGAGGCGGAGCTTGCAGTGAGCCGAGATCCCGCCACTGCA
12	130539598	130539599	677	AAACCACACACAACCACACACACAAAACTACACACAACCACACACCTCCACAACCACACACAACCACACACAGCCACACACACAACCACAACCAAACACGACAACACACACACACATATAACCCCACACACAACCATCACAACCCCACACACACCACCACAACCACACACAAACGACTACACACACACCACAACCACACACATATATACACACCACACAAAACCACAACCACATACCACCACAACCACACACGCA
12	130876713	130876714	1372	ATTCAATATTCACCAGGTAACTGACGCACACACGTGATGACGGTGACTGGGTCATCACAACATTCAATATTCACCAGGTAACTGACGGACACACATGATGACGGTGACTGGGTCCTCACAACATTCAATATTCACCAGGTAACTGACGGACACGTGATGACGGTGACCGGGTCATCACAACATTCAATATTCACCAGGTAACTGACGGACACGTGATGACGGTGACTGGGTCCTCACAACATTCAATATTCACCA
12	130877042	130877043	2104	ACACGTGATGATGGTGACTGGGTCATCACAACATTCAATATTCAACAGGTAACTGACGGACACACGTGATGATGGTGACTGGGTCATCACAACATTCAATATTCAACAGGTAACTGACGGACACATGTGATGATGGTGATTGGGTCATCACAACATTCAATATTCACCAGGTAACTGACGGACACACGTGATGACGGTGACTGGGTCATCACAACATTCAATATTCACCAGGTAACTGACGCACACACGTGATGA
12	130877220	130877221	59	CGTGATGACGGTGACCGGGTCATCACAACATTCAATATTCACCAGGTAACTGACGGACAT
12	131149012	131149013	66	TGCGTGTGTGTGTGCGTGCATGTGTGTGTGTGCATGCACGTGTGTGTGCGTGCGTGCGTGTGTGTGC
12	131266447	131266448	207	CCGACACCTGCCCCACCTCACAGCTGGAGGGACCATGGGGCGACACCTGCCCCCACCTCACAGCTGGAGGGGACCATGGAGCCGACACCTGCCCCCACCTCACAGCTGGAGGGGACCATGGGGCGACACCTGCCCCCACCTCACAGCTGGAGGGGACCGTGAAGCCAACACCTGCCCCCGCCTCACAGCTGGAGGGGACCATGGAGCT
12	131520989	131520990	107	CTCACTGCCCCAGGCCTTACTCACTGCATGGGGCCTCACTCACTGCACTGGGGTCTTACTCACTGCACCAGGGTCTTATTGCATCAGGTCTTACTGCTCCAGTCTCAC
12	131530749	131530750	453	GACACTGACCAGGGAGGGAGCACTGACCAGGGAGGGAGCATTGACCAGGGAGGACACTGACCAGGGAGGGAGCACTGACCAGGGAGGGAGCACTGACCAGGGAGGAGCACTGACCAGGGAGGACACTGACCAGGAGGAACACTGACCAGGGAGGAGCACTGACCACGGAGGACACTGACAAGGGAGGACACTGACCAGGGAGGGAGCACTGACCAGGGAGGGAGCACTGACCAGGGAGGACACTGACCAGGAGGA
12	131582697	131582698	221	GCTGCCTCACCGCCTTCTCCCACGGTGGCCGCTGTCTGGGCCTCACCGCCTTCTCTCCCACGGTGGCCGCTGTCTGGGCCTCACCGCCTTCTCCCACGGTGGCCGCTGTCTGGGCCTCACCGCCTTCTCCCACGGTGGCCGCTGTCTGGGCCTCACCGCCTTCTCCCACGGTGGCCGCTGTCTGGGCCTCACCGCCTTCTCCCACGGTGGCCGCTGTCTGGG
12	13164740	13164741	503	GTATTTTTTCTTGGCACAGGGTCCAGCCATAATCACAGATGACATTTACTTGTAGTGTCTCTCTAGTCTCGTTTAATTTGAATCAATTCTTTAGCCTTTTCTTGTCTTTTAAGACATTGACATTTTAAAAGAATATAGATTAGTAATTTTATGATATTGAAATAGTTGCTTCAATTTGGATTTTTCATCATTCTTCTCCTTTTTTAGGTTAAGATTCACTTACAGAGCACTTACTATGTGCCAGGCCCTGTTCTA
12	131797373	131797374	57	CGTCATCATCATCCTGCCCACTGTGCAGCTGGAAAACCCAAGGCTCAGAGGTGCTTTC
12	131962097	131962098	1278	ATCACCATCACCATTACCATCATCACCACCATTACCATCATCACCATCATTACCATCATCACTATCACCATTACCATCATCACCACCATTACCATCATCACTATCACCATTACCATCATCACCACCATTACCATCATCACCATCACCATTACCATCATCTCATCACCACCATTACCATCATCACCATCATTACCATCATCACTATCACCATTACCATCATCACCACCATTACCATCATCACCATCACCATTACCA
12	132101518	132101519	53	CCTGGAGGCGGACAGGGCGGGTTCGAGGAGCGGACGGGGCCTCATGACTCCTGG
12	132123038	132123039	609	GAGAGTGGTGAGGGGACAGATGAGGGTGGTGAGGAGAGAGATGAGGGTGGTGAGGAGAGAGATGAGGGTGGTGAGGAGAGAGATGAGGGTGGTGAGGAGACAGATGAGAGTGGTGAGGGGACAGATGAGGGTGGTGAGGAGAGAGATGAGGGTGGTGAGTGGACAGATAAGGGTGGTGAGGGGACAGATGAGAGTGGTGAGGGGACAGATGAGAGTGGTGAGGGGACAGATGAGGGTGGTGAGGAGAGAGATGAG
12	132651222	132651223	507	ATGGGTGGGTGATGGCTGGATGGATGGATGAATGGGTGATGGATGGATGGATGGATGAATGTATGATGGATCGCTGGGTGGATGGATGATGGATGGATGGATGGATGGATGGATGAATCAATGTATGATGGATGTCTGGGTGGATGGATGATGGACGGATGGTTGGATGGATGGCTGGGTGATGGCTGGATGAATGGGTGATGGATGGATGAATGAATGTATGATGGATGATGGACGGATGGATGAATGGATGGA
12	132666698	132666699	344	GCAACACACGCGATGCACACGATACACACCATCATACAAACACAACACACAACACACATGACACACACGACACACAATACACATGATAAACAATACACACCATCATACAACACACACACAAATGTGATACACATGCAATACACACACCATCATCCAAACACGCACCACACGCACACATGCAACACACACGCCATGCACACACAATACACACACACCATCATCCAAACACACACCACACACTGAACCACACAACAC
12	132957513	132957514	85	AGACAGAAAACATACTCAGCTAAGGCAGCACCTGGTACACAAAAGACAGAAGAGATACCAGCTAAGGCTGCACCTGATACACAGAA
12	132970835	132970836	52	TATCTGTCCCGGGTGACTCGGCGCCCACTGTCCCCGGGGTGACTCGGCGCCCC
12	132971191	132971192	96	CTGTGTGTGCATGTGTGTAGAAGTGTGGAAGTGCATGTGTGCATATATGTGTGTGTATGTACATGTGCATATGGGCTTGCTGGCATGTCTGTGTGTA
12	133133394	133133395	101	ACCCACCCCCCTCCTGTGGGACGCTCCTCTCCAGGCCTTCGTGCTGCACCCCCTCCACCCACCCCCTCCTGTGGGACGCTCTCTCTCCAGGCCTTCATGCTG
12	133304149	133304150	203	CCACAGTGCCTCTCCTCCGCCCGGGCACGTGTGCCCACGGTGCCAGGGTTCAGCAGTGCATCTCCTCCATCCGGGCGCGTGTGCCCACGGTGCCAGGGTTCAGCAGTGCCTCTCCTCCGCCCGGGCGCGTGTGCCCACGGTGCCAGGGTTCAGCAGTGCGTCCCTCTCCGTCCGGCGCGCATGTGCCGCGGTGCCAGGGTTCAG
12	133319348	133319349	649	CTCACCACCATCATCCTCACCACATCTTCACCATCATCATCCTCATCAGCATCACAACCATCATCACTACCATCACCCTCACCATCACCACCACAACCATCATCCTCCCTACCACCACCATTATCTCACTCACCATCACAATCCTCACCACTACCACCACCACCATCTTCATCCTCACCACCATCATGACCACATCATCACCATCTTCATCACCATCCTCACCACCATCATCCTCAACACAACCATCATCACTAC
12	133366378	133366379	58	CAGAGTGCTGGGATTACAAGTGTGAGCCACCGCGCCCGGCCTGCTGTATTTTATTTCTG
12	1337526	1337527	72	TACACTAACAATGAACTATCTAAAAAGAAATTTTAAAAATCTTATTTACAATAGCATCAAGACGTTCACAGGA
12	133808865	133808866	62	GAGACCAGCACCAGGCATCCTCCGTCATTAAGGAAATGGTGGGAGCCACACAGGAGTCACGGG
12	14332221	14332222	72	ACATGTACGTATGTAATATGTACATGTATGTACATATATGTACGTATGTAATATGTACATGCATGTACATATG
12	14476864	14476865	615	AGGAGGCTGAGGCAGGAGAATCGCTTGAACCCGGGAGGTGGAGGTTGCAGTGAGCCAAGATCCTGCCACTGCACTCCAGCCTAGGCGACAGACCAAGACTCTGTCTCAAAAAAAAAAAAAAGAAAAAAAAAATATATGTATGTGTGTGTGTGTATATATTCTTTTTTTTTTTTTGAGATGGAGTCTGGCTCTGTCGCCCAGGCTGGAGTGCAGTGGCGTGATCTCGGCTCACTGCAAGCTCCGCCTCCCAAATTC
12	15104634	15104635	330	TTTTTTTTTTTTTTTTTTTTTTTTTTTTTTTTTTTTGAGACGGAGTCTCGCTCTGTCGCCCAGGCTGGAGTGCAGTGGTGCTATTTCGGCTCACTGCAAGCTCCGCTTCCCGGTTTCACGCCATTATCCTGCCTCAGCCTCCCGAGTAGCTGGACTACAGGCGCCCGCGTACCACGCCCGGCTAATTTTTTGTATTTTTAGTAGAGACGGGTTTCACCGTGTTAGCCAGGATGGTCTCGATCTCCTGACCTCGTG
12	1652492	1652493	420	TGAAAGGTACTCAATAATTCTCTAGGCTGGGAGCAGCGGCTCACACTTTGGGGGCCGAGGCAGGAGGATCGCTTGAGGCCAGGAGTTTGAGACCAGCCTGGGCAACATAGCGAGACGCTCTCTCTACAAAATTTTTAAAAATTAGCCAGGAGGCCAGGCCCAGTGGCTCACGCCTGTAATCCCAGCACTTTGGGAGGCTGAGGCAGGTGGATCACGAGGTCAGGAGATCGAGACCATCCTGGCTAACATGGTGAA
12	1730121	1730122	863	GTCAAGGCGGGCGGATCATCTGAGGTCGGGAGTTCGAGACCAGCCTGACCAACATGGAGAAACCCCCATCCCTACTAAAAATACAAAATTAGCCGGGCGTGGTGGCACGTGCCTGTAATCCTAGCTACTCAGGAAGGCTGAGGCAGGAGAATCACTTGAACCTGGGAGGTGGAGGTTGCAGTGAGTTGAGATCACACCACTGCACTCTAACCTGGGCAATAAGAGCAAAACTCAATCTCAAAAAAAAAAAAAAAG
12	17827817	17827818	246	ATTTGTGAACTCAATAAATGCATTTGCAGCATATTGTGGAGTCAAATGCCTGAAAGAAGGTGATTGAAGGAAAAAATGGGAGGAGGGGAGTTTTTCTGTTAAAGGTAAGAAAAAACAATGGAGTAACAGCTAGAGGAAAATATAGATGTAGAAAGTTTTCTTTTTAATGTGGAAGAAATTACAGTATATATGTACAAAATATGTTTAGAAGATAATCCGGTTGAGAGGGAAAGTCAACAGTCACTTG
12	18248324	18248325	89	CTTCCTTCCTTCCTTCCTTCCTTCCTGCCTTCCTTCCTTTTCTTTATCTCTCTCTCTTGCTTGCTTGCTTTCTTTTTTGTTGTTTCTCTT
12	19546138	19546139	206	CCCAGGCTGGAGTGCAGTGGCACGATCTCGGTTCACTGCAACCTCCACCTCTTGGGTTCAAGTGATTCTCCTGCCTCAGCCTCCTGAGTAGCTGGGACTACAGGCATGAGCCACCACATTGGGCCAATTTTTTTATTTTTTAGTAGAGACAGGGTTTTGCCATGTTGGCCAGGCTGGTCTCGAACTCCTGACCTCAGGTGATCCACC
12	19940310	19940311	1268	AATAATAATAATAATAATAATAATAAGTGATCTAAACACATCACTTAAAAGGCACAGAGTGCCAAATTGGATTAAAAAAATAAGACCCATCTGTCTGCTGTCTTCAAGAGAACCATTTCACATATAACAACACTCATAGTCAAAGTAAGGTCTACCATGCAAATGGAAAACAAAAGAGATCAGGGATTGCTATTCTTATTTCAGACAAAACAGACTGTAAACAAACAGCAGTTTTAAAAAAGGCAGGGAAGAGCA
12	19951523	19951524	83	AACACCAGACGATCTTCTTTTATAAAGAAGGGGATTCTTTTTTTTTTTTTTTTTTTTTTTTTTTTTTTGAGACGGAGTCTCGCT
12	20765601	20765602	60	CTATATTACTTATATATAGTTACTTATATAAGTAACTATATTACTTATATATAGTTACTTA
12	20908672	20908673	317	CTGGCCGGGCGCGGTGGCTCACGCCTGTAATCCCAGCACTTTGGGAGGCCGAGGCGGGTGGATCATGAGGTCAGGAGATCGAGACCATCCTGGCTAACAAGGTGAAACCCCGTCTCTACTAAAAATACAAAAAATTAGCCGGGCGCAGTGGCGGGCGCCTGTAGTCCCAGCTACTGGGGAGGCTGAGGCAGGAGAATGGCGTGAACCCGGGAAGCGGAGCTTGCAGTGAGCCGAGATTGCGCCACTGCAGTCCGC
12	21464775	21464776	106	CGATTCTCCTGCCTCAGCCTCCCAAGTAGCTGGGATTACGGGCGTCTACCACCACGCCCGCTAGCATGATCTCAGCTCACTGCAACCGTTGCCTCCTGGGTTCAAGT
12	21815544	21815545	64	ATCTGAACATCAGAAGGAACAAACTCCGAACACGCCGCCTTTAAGAACTGTAACACTCACCGCGA
12	22085956	22085957	332	GCCGGGCGCGGTGGCTCGCGCCTGTAATCCCAGCACTTTGGGAGGCCGAGGCGGGCGGATCACGAGGTCAGGAGATCGAGACCATCCTGGCTAACACGGTGAAACCCCGTCTCTACTAAAAATGCAAAAAATTAGCCGGGCGTGGTGGTGGGCGCCTGTAGTCCCAGCTGCTCGGGAGGCTGAGGCAGGAGAATGGCGTGAACCCGGGAGGCGGAGCTTGCAGTGAGCCGAGATCGTGCCACTGCACTCCAGCCT
12	22123797	22123798	319	TAAGAATGGAAGGGAGGCCGGGCGCGGTGGCTCACGCCTGTAATCCCAGCACTTTGGGAGGCCGAGGCGGGCGGATCACGAGGTCAGGAGATCGAGACCATCCCGGCTAAAACGGTGAAACCCCGTCTCTACTAAAATACAAAAAATTAGCCGGGCGTAGTGGCGGGCGCCTGTAGTCCCAGCTACTTGGGAGGCTGAGGCAGGAGAATGGCGTGAACCGGGAGGCGGAGCTTGCAGTGAGCCGAGATCCCGCCA
12	22710571	22710572	347	AGCTGGATTACAGGCGTGCACCACCACACCCAGCTAATTTTTGTATTTTTAGTAGAGACAGGGTGTCACCACGTTGGCCAGGCTGGTCTTGAACTCCTGACCACAGGTAATCCGCCTCGGCCTCCTAAAGTGCTGGGATTACGGGTGTGAGCCACTGTGCCCGGCCCAGCATTTCTTAATTACTTTACCCTCTCTTGTTTTATTGCTTCATTTGCTTCTCTGTAGAAAGCAGGTTTCTCATTATCGTCAAGGTAA
12	2365239	2365240	5490	TAAGGTCAGGATCGTGTGATTGTAAACTAGTCAGGTCAGGATCGTGTGATTGTAAACTAGTCAGGTCAGGGTCGTGTGATTGTAAACTAGCAAGGTCAGGATCGTGTGATTGTAAACTAGTCAGGTCAGGATCGTGTGATTGTAAACTAGTCAGGTCAGGGTCGTGTGATTGTAAACTAGTAAGGTCAGGATCGTGTGATTGTAAACTAGTCAGGTCAGGATCGTGTGATTGTAAACTAGTCAGGTCAGGATCGT
12	23675668	23675669	142	TATATATATACACGTATATATACGTATATATACGTATATATATACGTATATATATACGTATATATACGTATATATATATGTATATATATACGTATATATACGTATATATATACGTATATATATACGTATATATATATGTGTGT
12	25259463	25259464	248	CAGACTCGCTCTCTCTTAAATATATATATATATTATATATACATGTATTTATATATATGCACACATATAAAAATATATATTAAATATGTGCACATATATATAAAATATGTGTATTATTAAATATGTATTATATAAATACATAATATATGCATAATATATATGTGTATATAATCTATAAATATGTGTATATATAATATATATTTTTAATATGTGTATATATAATATATATTTTTTTAAGAGACAGAGTCT
12	2571438	2571439	95	CGGGCCTGTATGGAGAGCTGAGCCGAGGTGGGGGCCAAGGAGGTGCGCAGGCCTGTGGCAGAGAGCTGAGCCAAGGGGGGGGCCGAGGAGATGCGC
12	25775841	25775842	5417	TACATACCATCTTTTTTTTTTTTTCATTTATTTTTTATTTTATTTTATTTTATTTTTTTTATTATACTCTAAGTTTTAGGGTACATGTGCACATTGTGCAGGTTAGTTACATATGTATACATGTGCCATGCTGGTGCGCTGCACCCACTAATGTGTCATCTAGCATTAGGTATATGTCCCAAAACTATCCCTCCCCCCTCCCCCAACCCCACCACAGTCCCCAGAGTGTGATATTCCCTTCCTGTGTCCATGTGA
12	26574523	26574524	55	AAACAGTCTCCCTTTTCATGTCATAAAAAAGTTGACATCGTCTAACCAGTCCTTCA
12	26650422	26650423	83	CAATGCCTGAAATGATCTTCCTCCGTCTTACCTATGAACTGGTCCTATCTTCCCTCTTCATTCTACAAATATTCATTAGGTGCC
12	26958661	26958662	406	GTAAAACTGGCGCGGGCACCGTGGCTCACACTGTAATCCCAGCACTTTGGAAGGCCAAGGTGAGTGGATCACAAGGTCAGGAGTTCAAGACCAGCCTGGCCAACATGGTGAAACCCTGTCTCTACTAAAAATACAAAAAAAAAAAAAAAAAAAAAAATAGCCGGGCTTGGTGGCAGGCACCTGTAATCCCAGCTACTCGGGAGGCTGAGGCAAGAGAATCGCTTGAACTTAGGAGGTAGAAGTTGCGGTGAGCTG
12	2792017	2792018	1447	TGTCTGTGTTGTGTGTTGTGTGTGTTTGTGTGTGTTTTGTGTGTGTGTGCGCGCATGTTTGTGTGTTGTGTTTGTGTGTTTGTGTGTTGTGTGTGTTTCTGTGTGTGTGTCTGTGGTGTGTGTGTTGTGTGTGGTGCGTGTGTTGTGTGTGGGTGCGTGTGTTTGTGTGTGTGCGTGCATTGTGTGCGTGCATGTATGTTTGTGCGTTTTGTGTGTGTGTGTTGTGTGGTTGTGTTGTGTGTGTTGTGTTTTGTG
12	28114255	28114256	111	GATATATATATATATATATATATACGTATATATATATACGTATATATATATACGTATATATACGTATATATATATATACGTATATATATATACGTATATATATACGTATATA
12	28274581	28274582	336	TAAAGAAAATGAGGCCGGGCGCGGTGGCTCACGCCTGTAATCCCAGCACTTTGGGAGGCCGAGGCGGGCGGATCATGAGGTCAGGAGATCGAGACCATCCTGGCTAACAAGGTGAAACCCCGTCTCTACTAAAAGTACAAAAAATTAGCCGGGCGCGGTGGCGGGCGCTGTAGTCCCAGCTACTCGGGAGGCTGAGGCAGGAGAATGGCGTGAACCCCGGGAGGCGGAGCTTGCAGTGAGCGAGATTGCGCCACT
12	28417308	28417309	324	TTTTTTTTTTTTTTTTTTTTTTTTTTTTTTTGAGACGGAGTTTCGCTCTGTCGCCCAGGCTGGAGTGGCAGTGGCGCGATCTCGACTCACTGCAAGCTCCGCCTCCCGGGTTCCACGCCATTCTCCTGCCTCAGCCTCCCGTGTAGCTGGGACTACAGCGCGCGCGCCACCATGCCCGGCTAATTTTTGTATTTTTAGTAGAGACGGGGTTTCATCGTGTTAGCCAGGATGGTCTCGATCTCCTGACCTCGTGAT
12	2854991	2854992	65	TTCCCTTCCTTCCCTTCCCTTCCTTCCCTTCCCTTCCCTTCCCTTCCCTCCCTTCCCCTTCCCTTC
12	2858860	2858861	580	CGCTCTGGGAGTTCAGGAAGTGAAGAGCTCGCTCTGGGTAGGGGTGGGATTGGGGTCTGCTGATGCCTTCTGGTGGAGATAAGGAAGTGTGTTCTGGCTCTCAAGAAGAGTTTACATTAGGGCTTAAGCTGGACAAGGAGGGACTGATATGATGTTTAGTGAAAAATCTGATTAAACCTTTTTCTGAATGGCCTCAGGGATCTAGAATTGGGTTGACCCTAGTCCTTGCTTGATGACATGCTCTTGTTCACATGG
12	28911524	28911525	51	TTTTTAAGTATTTTAATTGAAATGTAATATACATGTAGAAAAGTGCAAAAGT
12	29823927	29823928	310	TTTTTTTTTTTGAGACGGAGTCTCGCTCTGTCGCCCAGGCTGGAGTGCAGTGGCGGGATCTCGGCTCACTGCAAGCTCCGCCTCCCGGGTTCACGCCATTCTCCTTGCCTCAGCCTCCCAAGTAGCTGGACTACAGGCGCCCGCCCACTACGCCCGGCTAATTTTTTGTATTTTGTAGTAGAGACGGGGTTTCACCGTTTAGCGGGGATGGTCTCGATCTCCTGACCTCGTGATCCGCCCGCCTCGGCCTCCCAA
12	30420646	30420647	315	TGGCCGGGCGCGGTGGCTCACGCCTGTAATCCCAGCACTTTGGGAGGCCGAGGCGGGCGGATCACAAGGTCAGGAGATCGAGACCATCCTGGCTAACACGGTGAAACCCCGTCTCTACTAAAACTACAAAAAATTAGCCGGGCATGGTGGCGGGCGCCTGTAGTCCCAGCTACTTGGGAGGCTGAGGCAGGAGAATGGCGTGAACCCGGGAGGCAGAGCTTGCAGTGAGCCAAGATCGTGCCACTACACTCCAGC
12	306331	306332	936	GATAGATGGATGGATAGATGGATGGATGGATGGATGGATGGATAGATGGATAGATGGATGGATGGATGGATGGATGGATGGATAGATGGATGGATGGATGGATGGATGGGTAGATGGATGGATGGATGGATGGATGGATGGATGGATGGATAGATGGATGGATGGATGGATGGATGGGTAGATGGATGGATGGATGGGTAGATGGATGGATGGATAGATGGATGGATGGATGGATGGATGGATGGATAGATGGAT
12	31802951	31802952	316	GAACTTTGGGAGGCCAAGGTGGGTGGATCGCTTGAGCTCAGGAGTTCGAGACCAGCCTGGCCAACATGGCGAGTCGCCATCTCTACTAAAAATACAAAAATTAGCTGGGCGTGGTGGCACACACCTGTAATCCCAGCTACATGGGGCGCTGAGGTGGGAGGATTGTTTCAGCCCAGGAGTTTGAAGCTGCAGTGGGCTGAGATTTCACCACTGCATTCCAGCCTGGCGACAAAGTGAGACTCTGTCTCAAAAAAA
12	32076423	32076424	314	ATCTCGGCCAGGCGCGGTGGCTCACGCCTGTAATCCCAGCACTTTGGGAGGCCGAGACGGGCGGATCACGAGGTCAGGAGATCGAGACCATCCTGGCTAACACGGTGAAACCCTGTCTCTACTAAAAATACAAAAATTAGCCAGGCATGGTGGCGCGCGCCTGTAGTCCCAGCTACACGGGAGGCTGAGGCAGGAGAATGGCGTGAACCCGGGAGGCGGAGCTTGCAGTGAGTCGAGATCGCGCCACTGCACTCC
12	32251805	32251806	145	TCTCGATCTCTTGACCTCGTGATCCAGCCGCCTCGGCCTCCCAAAGTGCTGGGATTACAGGCATGAGCCACCACACCCGGCCAAAGCCCGGCTAATTTTTTGTATTTTTAGTAGAGATGGAGTTTCTCCATGGTGGTCAGGCTGGC
12	32358651	32358652	332	TAGGCCGGGCGCGGTGGCTCACGCCTGTAATCCCAGCACTTTGGGAGGCCGAGGCGGGCGGATCACGAGGTCAGGAGATCGAGACCATCCCGGCTAAAACGGTGAAACCCCGTCTCTACTAAAAATACAAAAAAAAAAAAAAATTAGCCGGGCGTAGTGGCGGGCGCCTGTAGTCCCAGCTACTTGGGAGGCTGAGGCAGGAGAATGGCGTGAACCCGGGAGGCGGAGCTTGCAGTGAGCCGAGATCGCGCGCCA
12	33280457	33280458	1412	TGAGACATTTTACATTTTTTCTTTTTTTTTTTTTTTTTTTTTTTTTTTTTTTTTTTATTATATACTCTAAGTTTTAGGGTACATGTGCACATTGTGCAGGTTAGTTACATATGTATACATGTGCCATGCTGGTGCGCTGCACCCACTAATGTGTCATCTAGCATTAGGTATATCTCCCAATGCTATCCCTCCCCCTCCCCCGACCCCACCACAGTCCCCAGAGTGTGATATTCCCCTTCCTGTGTCCATGTGATC
12	34017325	34017326	6398	GGATTTCTTGGGGAGGAGCCAAGATGGCCGAATAGGAACAGCTCCGGTCTACAGCTCCCAGCGTGAGCGACGCAGAAGACGGTGATTTCTGCATTTCCATCTGAGGTACCGGGTTCATCTCACTAGGGAGTGCCAGACAGTGGGCGCAGGCCAGTGTGTGTGCGCACCGTGCGCGAGCCGAAGCAGGGCGAGGCATTGCCTCACCTGGGAAGTGCAAGGGGTCAGGGAGTTCCCTTTCCGAGTCAAAGAAAGGGG
12	34202959	34202960	117	CCAGGTGTTCTTTGTGCTTCTTGTATTTGCATATCTAGGTCTCTAGTAAGGCTGGGGAAGTTTTCCTCAATTATTCCCCCAAATATGTTTTCCAAACTTTTAGATTTCGCTTCTTCCT
12	38135079	38135080	2827	GAGCAGTTTTGAAACAGTATTCTTGAAGAATCTGCAAAGGGACATTTGTGGGCCCATTGAGACCTAATGTGAAATAGGAATTACATTCACATAAAAACTAGATAGAAGCGTTCTGAGATACTTTTTTGTGATGTGTGCTTTCATCTAACAGAGTTGCACCTGTCTTTTGATTGTGCTGATTGGAAACAGTCTTTTCATAGAATCTTCAAATGGATATTTGGAGCTTTCTGAGACCTATGGTGAAAAAGGAAATAT
12	38366855	38366856	5520	TGAGGTGAATGCACACATCACAAAGCAGTTTCTCAGAAAGCTCCACTGAAGTTTTTATCTGAAGATATTTTCCTTTTTCACCATTGGTCACAATGTGTTCCCAAATATAAGTTTGGAGATTTTACAAAAACAGTAGTTCCAAACTGCTCAACCAAAAGAAAATTTTGAGTCTGGTAGATGAATGCACACATCACAAAACAATTTCTCAGAAAGCTTCTTTCTAGTTTTTATGTGAAGATATTTCCCACCATATGC
12	40107982	40107983	77	GTATATATACATATATACGTATGTACATATATACATATACACGTATACATACGTATATACATATATACGTATGTACAT
12	42482699	42482700	90	TGGGGTGTTCTTTTTTTTTTTTTTTTTTTTTTTTTTTTTTTGAGACGGAGTCTCGCTCTGTCGCCCAGGCCGGACTGCGGACTGCAGTGGC
12	43256986	43256987	1159	TAAAAAGAATTAAACGTTAAACCTAAAACCATAAAAACCCTAGAAGAAAACCTAGGCATTACCATTCAGGACATAGGCGTGGGCAAGGACTTCATGTCCAAAACACCAAAAGCAATGGCAACAAAAGACAAAATTGACAAATGGGATCTAATTAAACTAAAGAGCTTCTGCACAGCAAAAGAAACTACCATCAGAGTGAACAGGCAACCTACAACATGGGAGAAAATTTTTTGCAACCTACTCATCTGACAAAGG
12	46175156	46175157	1032	TTGGCCAGGCACGGTGGCTCACGCCTGTAATCTCAGCACTTTGGGAGGCTGAGGTGGGCGGATCATGAGGTCAGGAGATTGAGACCATCCTGGCTAACATGGTGAAACCCCATCTCTACTAAAAATACAAAAAAAAAAAATTAGCCGGGCATGGTGGAGGGCGCCTGTAGTCCCAGCTACTCGGGAGGCTGAGGCAGGAGAATGGTGTGAACCCGGGGAATGGCGTGAACCCGGGAGGCGGAGCTTGCAGTGAGC
12	47369631	47369632	1045	ACTTTTTTTTTTTTTTTTTTTTTATTTATTTTTTTTTTTTTTTTTATTATACTCTAAGTTTTAGGGTACATGTGCACATTGTGCAGGTTAGTTACATATGTATACATGTGCCATGCTGGTGCGCTGCACCCACTAATATGTGTCATCTAGCATTAGGTATATCTCCCAATGCTATCCCTCCCCCCTCCCCGACCCCACCACAGTCCCCAGAGTGTGATATTCCCCTTCCTGTGTCCATGTGATCTCATTGTTCAA
12	47373499	47373500	541	AAAGGAAAGGAAAGGGAAAGGGAAAGGGAAAGGGAAAGGAAAGGAAAGGGAAGGGAAGGGAAGGGAAGGGAAGGGAAAGGAAAGGAAAGGAAGAAAGAAGGGAAGGAAGGGAAGAGGGAGGGAGGGAGGAAGGAAAGAGGGAGGGAAGGAAGGAATCAGGAAGGAAGAAAGAAGGGAGGGAGGGAGGAAGAAAGGAAGGAAGGAGGGAAGGAAGAAAGGAAGGAAGGAGAGAGAAAGGGAGGGAGGAAGGAAGGA
12	48312478	48312479	324	TTTTTTTTTTTTTTTTTTTTTTTTTTTTTTTTGAGACGGAGTCTCGCTCTGTCGCCCAGGCTGGAGTGCAGTGGCGCGATCTCGGCTCACTGCAAGCTCCGCCTCCGGGTTCACGCCATTCTCCTGCCTCAGCCTCCGAGTAGCTGGGACTACAGGCGCCCGCCACTACGCCCGGCTAATTTTTTGTATTTTTAGTAGAGACGGGGTTTCACACGTGTTAGCCAGGATGGTCTCGATCTCCTGACCTCGTGATCC
12	4842207	4842208	169	TTCCTCTAGATGTCATCCAACCAACAAACACTTTTTCAGTATCTTCTGCTGCACCGTTCAGTATGATAGCTACTAGTCACACATGGCTACTTAAATGTAAATTAATTAAAATTATTTGCTTGAGGTGGTACACTGTGATTCTCTGCTGGGAGGAGTGGCTAGAGATCTGT
12	48929064	48929065	713	TGTGTGTGATGTTTTTTTTTTTTTTTTTTTTTTTTTTAAACTTCTTTTTTTTTTATTTTTTTTTATTTTTTATGTTTTTAATTAGAATTTTTTTTTTTTATTATACTCTAAGTTTTAGGGTACATGTGCACATTGTGCAGGTTAGTTACATACGTATACATGTGCCATGCTGGTGCGCTGCACCCACTAATGTGTCATCTAGCATTAGGTATATCTCCCAATGCTATCCCTCCCCCCTCCCCCGACCCCACCACA
12	50005471	50005472	747	CGTCTCTACTAAAAATACAAAAAATTAGCCGGGCGTGGTGATGGGCGCCTGTTAGTCCCAGCTACTCAGGAGGCTGAGGCAGGAGAATGGCGTGAACCGGGAGGCGGAGCTTGCAGTGAGCCGAGATCACGCCACTGCACTCCAGCCTGGGCGACAGAGGGAGACTCTGTCTCAAGAAAAAAAAAAATGTAGAGACGGGATTTCACCACATTGCCCAGGCTGTTCTCATACTCCTGGGCTCAAGTAATCCACCCG
12	50271405	50271406	109	GCTTTTCTAGTGGGGATGGCGATATATGCCCTAACTTCCTCACAATTAGAAAAACACTTCGAAAAGTAAAAATGGCCACACAAATCCAAGGCTGAGGCATGACTTTTAGA
12	51892564	51892565	713	AGCCTCCCGAGTAGCTGGGACTACAGCACACATCATTGAGTATCATTACAAAATACTTATCATCATTAAGTATTTTTTAAAACTTTATTTTTAGACCAGGCGCGGTGGCTCACGCCTGTAATCCCAGCACTTTGGGAGGCTGAGGAGGGTGGATCACGAGGTCAAGAGATTAAGACCATCCTGGCCAACATGGTGAAACCCCGCCTCTACTAAAAATACAAAAATTAGCTGGGCATGGTGGCGCGCGCCTGTAGT
12	52131502	52131503	157	AACATTGGAGTAATATTTCTCAGTGGGGGCAGCACAAAGTATATCATCCATATAATGATAATGTAACACTGTGAAAATTTTTAGAGTAGGTTCAATTGCTTGCCGTAATTCTGGCAAATTGTTGACTGTTTAACATGCCTGTGGCACACTTTCAATGA
12	52227802	52227803	79	TGGATGGATGGATGATGGATGGATGGATGAATGGACAGATGGACAGATGGACAGATGGATGAATAGACAGACGGATGGGT
12	52662949	52662950	272	GTCTTTGTAATTCTCTGTTCTGCTTTTAGGCAAACACAGGGAAAGCAGAGAACTCCCCTGCATCTTCTTAATTGCCTTTAGCTTGATAAAATATTTATGTCAGGCTGGGCACGGTGGCTCACACCAGTAATCTCAACACTTTCGAAGGCCAAGGCAGGTGGGCCACTTGAGCTCAGGAGTTCAAGACCAGCTTGGGCAACATGGCAAAACCCCATCTGATATGGTTTGGTTGTGTCCCCACCCAAATCTCATCTT
12	528635	528636	69	ATGTGTATTTTACCCTCACTCCCAGCACACACAGAAGAGCACTGTAATGGAACATGGAGTGTGCTGCTAT
12	528961	528962	1026	TGCACTGTAATGGAGCATGGAGGTGTGCTGCTATGTGTATTTTTACCCTCTCACTCCCAGCACACACACACAGAAGTGCACTGTAATGGAGCATGGAGGGTGCTGCTATGTGTATTTTACCCTCTCACTCCCAGCACACACACACAGAAGTGCACTGTAATGGAGCATGGAGGGTGCTGCTATGTGTATTTTACCCTCTTCACTCCCAGCACACACACACAGAAGTGCACTGTAATGGAACATGGAGTGTGCTGC
12	531258	531259	302	CACAGAAGAGCACTGTAATGGAGCATGGAGTGTGCTGCTATGTGTGTATTTTACCCTCTCACTCCCAGCACACACACACACGAGAGAGCACTGTAATGGAGCATGGAGTGTGCTGCTATGTGTATTTTACCCTCTCACTCCCAGCACACACACACAGAAGTGCACTGTAATGGAACATGGAGGGTGCTGCTATGTGTATTTTACCCTCTCACTCCCAGCACACACACACAGAAGAGCACTGTAATGGAACATGGA
12	53540972	53540973	145	ATGTGTATATATACATATACACACACATACACACACATATATATGTGTATATATACATATACACACCTACACACATATATATGTGTATATATACATATACACACAACATATATGTGTATATATATACATATACACACACATATATG
12	53542053	53542054	1212	TGGCGCTATCTCGGCTCACTGCAAGCTCCGCCTCCCGAGTTCATGCCATTCTCCTGCCTCAGCCTCTCTAGTAACTGGGACTACAGGTGCTCGCCACCACGCCCGGCCAATTTTTTGTATTTTTGAGTAAAGACGGGGTTTCACCATGTTAGCCAGGAAGGTCTCAATCTCCTGACCTCGTGATCCGCCCACCTTGGCCTCCCAAAGTGCTGGATTACAGGCGTGAGCCACCGCGCGCCGGCCCTGAATAGCCAT
12	53684501	53684502	141	GTTAGTTATGACTAACAGAAGTTATGACTAATAGAAGGCAAGAATCTAGAAACTTTTTTCATTTTCTGAGACTGGGAGAGTATAGACTATTATCTATCCCTCTGTTGTGACAAATATGAACAGGTGGCAATGAAAGCTAAAA
12	54324315	54324316	90	AACAGACGCGGAGCGTCGGGAGCTAGGTCCCTGTGCCTCCAGAGGGATACATCCTGACTGCCAATTTCTCTTCGCAACATCCACGGCCAAG
12	54603022	54603023	1075	CACCTGTAATCCAAGCTACTCGGGAGGCTGAGGCAGGAGAATCGCTTGAACCTGGGAGGCGGAAGTTGCAGTGAGCCGAGATCGCGCCGCTGCACACCAGCCTGAGAGACAGAGTGAAACTCCGTCTCCAAAACAACAACAATAACAACAACAACAAAACACACACACACACACACACACACACACACACACACACACAACACAGGCACTCTAGTTTCTGATTCCTACTCCCAAACCTCTCTGGGGCCTATTGTC
12	5590654	5590655	576	GTGTGACTGTGTGCATGTGTGTTATGTTATTGTGTGTGTGATGTATGTCTGTATGCATTTGTGCATGTGTGTGTGGTGGTATTCTGTGTGTGGTGTATATCTGTGTGTGTGCGTGTGTGTTACTCTGTGTGTGGTGTGTGTATGCGCGTGTGTGTGGTGTTATTCTGTGTGTGTGCGCATGTGTGGGTGGTGTTATTCCGTGTGTGGTGTGTGTATGTCTGTGTGTGCATGTTTCTGGTGTTATTCTGTGTGTGT
12	56952119	56952120	310	GGTGGCTCACGCCTGTAATCCCAGCACTTTGGGAGGCCAAGGCGGGTGGTTCACTTGATGTCAGGAGTTCAAGACCAGCCTGGCCAATATGGCAAAACCCCATCTCTATTAAAAATACAAAAATTAGCCGGGCATGGTGCCACATGCCTGTAATCCCACCTATTCGGGAGGCTGAGGCAGAAGAATCGCTTGAACCCGGGAGGCAAAGGTGCAGTGAGACAAGATTGCATCATTGCACTCCAGCTTGGGTGACAG
12	5747652	5747653	450	TGGCCTCCCAGCACTGATTCTTATAACTACCATGCAAGATATGCCTTTAATAGGTGAGATTTCATGATGATTTAGGATTTGAACCCTGCTCCATGGTTCCAAAGTCTACAATCCCATCCTGACATTAGAACTCAGGTTTTCCAGCACTACATCTAGTACTATTTCCACCACTTGTGGTTACATTATTGATTTTCTTTTTCTTTTTCTTTTTTTGTTTGAGATAGAGTTTCACTCTTGTTGCCCAGGCTGGAGTGC
12	57585718	57585719	431	GTGTGGTGTGTTGCGTGGTGTGTGTGTGGTGTGTTGCATGGTGTGGTGTGTGTCTTGTGTGTGCTGCAGTGTGTGTGGTATCTGTGTATGTGGTGTGTGTGTGGTGTGGTGTGTGTACTGCATGTGTATGTGGTATAGTATGTGTGGTGTGTGTATGTGTGTGTGCATGTGATGTGTGTTGGTTGTGTGTGTGGTGTACATGTCCTGTGTGGTGTGTGTGGTGTGTTGTATGGTGTGGTGTGTATCTCGTGTGTG
12	58083279	58083280	316	ACCAAACTATAATTTTTTTTTTTTTTTTTTTTTTTTGAGACGGAGTCTCGCTCTGTCGCCCAGGCTGGAGTGCAGTGGCGGGATCTCGGCTCACTGCAAGCTCCGCCTCCCGGGTTCACGCCATTCTCCTGCCTCAGCCTCCCAAGTAGCTGGGACTACAGGCGCCCCGCCACTACGCCGCGCTAATTTTTTGTATTTTTAGTAGAGACGGGGTTTCACCGTTTTAGCCGGGATGGTCTCGATCTCCTGACCTCG
12	58359065	58359066	327	TTCTTTTTTTTTTTTTTTTTTTTTTTTTTTTTTTTTTTTTTTTGAGGCGGAGTTTCGCTCTGTCGCCAGGCTGGAGTGCAGTGGCGCGATCTCGACTCACTGCAAGCTCCGCCTCCCGGGTTTACGCCATTCTCCTGCCTCAGCCTCCCGTGTAGCTGGGACTACAGGCGCGCGCCACCATGCCCGGCTAATTTTTGTATTTTTAGTAGAGACGGGGTTTCACCGTGTTAGCCAGGATGGTCTCGATCTCCTGAC
12	58458210	58458211	307	TTTTTTTTTTTTTTTTGAGACGGAGTCTCGCTCTGTCGCCCAGGCTGGAGTGCAGTGGCGGGATCTCGGCTCACTGCAAGCTCCGCCTCCCGGGTTCACGCCATTCTCCTGCCTCAGCCTCCCAAGTAGCTGGGACTACAGGCGCCCGCCACTACGCCGGCTAATTTTTGTATTTTTAGTAGAGACGGGGTTTCACCGTTTTAGCCGGGATGGTCTCGATCTCCTGACCTCGTGATCCGCCCGCCTCGGCCTCCC
12	58469500	58469501	8829	AAATGTATTTCTGGTTCTAGATCCCTGGAGGAATCGCCACACTGACTTCCACAAGGGTTGAACTGATTACACTCTCACCAACAGTGTAAAAGTGTTCCATATTTCTCCATATCCTCTCCAGCATCTGTTGTTTCCTGACTTTTTAATGATTGCCATTCTAACTGGCATGAAATGGTATCTCATTGTAGTTTTGATTTGCATTTCTCTAAATGACCAGTGATGATGAGCTTTTTTTCATATGTTTTTTGGCTGCAT
12	59029090	59029091	2496	GCTCTCCCTCTCCCTCTCCCTCTCCCTCCCCCTCCCTCTCCCTCTCCCTCTCCCTCCTCCCTCCACGGTCTCCCTCTGATGCCGAGCCAAGGCTGGACGGTACTGCTGCCATCTCGGCTCACTGCAACCTCCCTGCCTGATTCTCCTGCCTCAGCCTGCCGAGAGTGCCTGCGATTGCAGGCACGCACCGCCACGCCTGACTGGTTTTCGTTTTTTTTTGGTGGAGACGGGGTTTCGCTGTGTTGGCCGGGCTGG
12	60225834	60225835	137	CCTTTCTTCCTTCCTTTCCTTCCTTCCCTTCCCCTTCCTTCCTTCCTTTCCTTCCTTCCCTTCCCTTGCCTTCCCCTTCCTTCCTTTCCTTCCTTCCCTTCCCTTGCCTTCCCCTTCCTTCCTTCCTCCCTCCACCCT
12	60675078	60675079	134	TATATCAAGTATCCCTAATGGAAGAAATGCCTTATAGCATAATTTTACAAGTCTTCTCTGATTTATCTGCTTTGAGTCTCTAGCTGTGTGAGATATGTTTCCACAGAGAAAATAAATGCCTGTTCTTTATAACCA
12	61537939	61537940	196	ATGTCTCAGATTTCTTTTTTTTTTTTTCTTTTTTTTTTTTGAGACGGAGTCTCGCTCTGTCACCCAGGCCGGAGTATTTTTAGTAGAGACGGGTTTCACCTTGTTAGCCAGGATGGTCTCGATCTCCTGACCTCGTGATCCACCCGCCTCGGCCTCCCAAAGTGCTGGATTACAGGCGTGAGCCACCGCGCCCGGCC
12	62880036	62880037	328	TAAAAAAAGACTGATTTCGGCCGGGCGCGGTGGCTCACGCCTGTAATCCCAGCACTTTGGGAGGCCGAGACGGGCGGATCACGAGGTCAGGAGATCGAGACCATCTTGGCTAACACGGTGAAACCCCGTTTCTACTAAAAATACAAAAAATTAGCCGGCGTGTTGGCGGGCGCCTGTAGTCCCAGCTACTTGGGAGGCTGAGGCAGGAGAATGGCGTGAACCCGGGAGGCGGAGCTTGCAGTGAGCCGAGATTGC
12	629718	629719	92	TGCTCAGTAGTTTAATCGGCCATCATAACGGCCGATGTCTCATTGCATTGCTGAAAGGTAAGAGTAGATCAGTAGAAATTATCTTATGGGATT
12	63949921	63949922	56	GTATATATATACGTATATATATACGTGTATATATATACGTATATATATATACGTGTA
12	6414695	6414696	1757	ATACAAAAAATTAGCCAGGCGTGGTGGCGGGCGCCTGTGGTCCCAGCTACTCGGGAGGCTGAGGCAGGAGAATGGCGTGAACCCGGGAGGCGGAGCTTGCAGTGAGCCAAGATCGTGCCACTGCACTCCAGCCTGGGCAACAGAGCGAGACTCCGTTCAAAAAAAAAAAAAAGAAACCGACACAAAATGGATGCAAAGTCAGAGGCAGACATCTGTCCTACATACTCACAGTGGTCTCCTGTTTGGCAGCTGGCA
12	64423584	64423585	88	TCCCTAGTACCTGAGATTACAGGCACGCGCCACCACACCTGGCTAATTTTTGAATTTTAGTCGAGATGGGGTTTCACCGTGTTGGCCAG
12	64597809	64597810	86	GTTTTCTGTTCCTACGTTAGTTTGCTGAGGATAATGGCTTACAGCTTCATCCTTGTCCCTGCAAAGCGAGAACATGCAGTGTTTAGT
12	6472106	6472107	637	CCCAAGTGCTAGGATTACAGGCGGGAGTCACTGCGCCCAGCCTTATTTTATATTAAAAAAAAAAAATTGGGACGGGTGCGGTGGCTCACTCCTGTAATCGGGCACTTTGGGAGGCCGAGGCGGGCAGATCACCTGAGGTCGGGAGTTGGAGGCCAGCCTGACCAACATGGAGAAACCCCATCTCTACTAAAAATATTAAAAATTAGCCAGGCATGGTGGTTCATGACTGTAATCCCAGCTAGTCGGGAGGCTGAG
12	6512743	6512744	699	GGTATGTTGGTGGGCATCTGTAATTCCAGCTACTCGGGAGGCTGAGGCACAAGAATTGCTTGAACTTGGGAGATGGAGGTTGCAGTGCGCCAAGATTGCATCACTGCACTCCAGCATGGGTGACAGAGCAAGACTCTGTCTCAAAAATAAATAAATAAATAAATAAATAAATAAATAAATAAATAAATAAATAAATTGGGCTATTTTGTTGTTGTTGTTTGTTTGCTTGTTTGTTTTTGAGATGGAGTCTCGCTT
12	65177630	65177631	189	GTTTTTTTTTTTTTTTAAATAGAGTTTTGCTCTTGTTGCCCAGGCTGGAGTGCAATGGTGCGATCTTGGCTCACTGCAACTTTCGCCTCCTGGTTTCAAGCGTTGCTCCTGATCCAGCCTCCCAAGTAGCTGGGATTACAGCCATGTGCCACCATGCCTGGCTAATTTTGTATTTTTAGTAGAGACGGGG
12	67011575	67011576	337	TTCTTTTTTTTTTTTTTTTTTTTTTTTTTTTTTTTTGAGACGGAGTCTCGCTCTTCGCCCAGGCCGGACTGCGGACTGCAGTGGCGCAATCTGCGCTCACTGCAAGCTCCGCTTCCCGGGTTCACGCCATTCTCCTGCCTCAGCCTCCCGAGTAGCTGGCGACTACAGGCGCCCGCCACCGCGCCCGGCTAATTTTTTGTATTTTTAGTAGAGACGGGGTTTCACCTTGTTAGCCAGGATGGTCTCGATCTCCTG
12	67632885	67632886	55	AGTTTATTAACTAAACTTTATAAACTAAAGTTTATTAACTAAACTTTATAACTAAA
12	67705313	67705314	131	TGTTTGAGACAGATTTGTCTCAAACCTTATCTGAGTTAAGTGCTAAAGAGACCTCACCTATAATATGCTGCTCAATAGACCTCACCTAAAATACAATCTGGTGAGGTCTCTTTAGCACTTAACTCAGGTAAG
12	68267511	68267512	89	CCAGTTGGAAGAAAACACTCAAAGATATATCATTAATAAAAACAGAATAGAATCACTGTTTTGTTTTGTTTTGTTTTGTTTTCCAACAGA
12	7002480	7002481	1325	GTCTCTACTAAAAATACAAAAATTAGCCAGGTGTGGTGGCATGCGCCTGTAGTCCCAGCTACTTGGGAGGCTGACGCAGGAGAATTGCTTGAACCCGGGAGGTGGAGGTTGCAGTAAGCCGAGATCAGGCCACTGCACTCCAGCCTGGGTGACCAGAGCGAGACTCCATCTCAGAAAATAAATAAATAAATAATAAATAAATAAAAGCAGAGTTAGAGGAAAAGATTGAGAATTTGGTTTTGGACATGTTGAGTT
12	70421612	70421613	68	CACATATATATACACATGTGTATATGTATATACACACATACACATATATACACATGTGTGTATGTATAT
12	7059167	7059168	2304	ACTCCTGACCTCAAGTGATCTGCCCACCTCGGCCTCCCAAAGTGCTGGGATTACAGACGTGAGCCACCGCGCCTGGCCTGGTTTTTAATTTTTTAAAAATTTATTGGCCGGGCGTGGTGGCTCACGCCTGTAATCCCAGCACTTTGGGAGGCCAAGGTGGGCGGATCACGAGATCAGGAGATCGAGACCATCCTGGCTAACACGGTGAAACCCCGTCTCTACTAAAATACAAAAAAAATTAGCCAGCGTGGTGGC
12	7094805	7094806	1068	GCAGAGTTTGCAGTGAGCTGAGATCGTGCCATTGCACTCCAGCTTGGGCAACAGAGCGAGACTCTGTCTCAAAACAAACAAACAAACAAATGCCATTTGATCTTCCTGGTGCCAGGATCAACTGGTGTTTTTTTTTTTTTTTTGAGATGGAGTTTAGCTGTTTTTACCCAGGCTGGAGAGTGCAATGGCACGATCTTGGCAGCTCACTGCAACCTCCGGCCCCTAGGTTCAAGCGATTCTCCTGCTTCAGCCTCC
12	71081096	71081097	81	TTTATATATATGTTATATATATATAACATATATAACATATAGTTATATATATAACATATAAACATATAGTTTTATATATATG
12	7108116	7108117	786	AATTCTCCTGCCTCAGCCTCCCAAGTAGCTGGGACTACAGGCGTGTGCCACCATGCCTGGCTAATTTTTGTATTTTTAGTAGAGATGGGGTTTCACCATGTTGGTCAGGCTGGTCTTGAACTCCTGACCTCTGGTGATCCGCCCGCCTCAGACTCCCAAAGTGCTGGGATTATAGGCGTGAGCCACCGCGCCTGGCCTACTTACATTCGTTAAACCTCAATTTCTTCATCTTTGAAATCGGGAAAATACCAGCCA
12	71533753	71533754	498	TTTGTACTTTTTAAGTGAATGCCTGTGAATTATCCAAACCCAATTTATCCTCCTCAATGCTCTCTAAGAGATAATTCTGATTATCTCATTCATTTAAACTTTTTTTTTAGCATGGCATGTAGAACACCTATGATTTTACCCCAACCCACACTTGGATTCATCTTCCATCATTTACTGGAAACAGTTTTGCCGGTCTCCTGCCATACCCAAGGCTTCTCAGTTCCCAAACACACCAGCACTGTACTGCCACGTTGT
12	73580672	73580673	2031	CAGTCAGCCCACTCTTCCACAAGGCTGCTGCAGTTTTCTGGGGATTCACTCCAACCCTTGTTTGCCTCATTTTACCTGTACCTGGACATATCACCAGTGAAGACTGTGAAAACAGCAAAGGTGTTAGCCTTTTCCTTCCTCTAGAGGCTTCATCCAGGGGTTACTGACCCTGTTGCTGGCTTAAATCCACCTGTAGGAGGTGGCTGGAGGCCCTTTAGGAGGTCTCAGCCAGTCAAGAGGATGGGATGAGCAACA
12	74124805	74124806	159	CTTTTTTTTTTTTTTTTTTTTTTTTTTTTTTTTTTTTTTTTTTTTTTTTTTGAGACGGAGTCTCGCTCTGTCGCCCAGGCTGGAGTGCAGTGGCGCAATCTCGGCTCACTGCAAGCTCCGCCTCCCGGGTTCACGCCATTCTCCTGCACCTACATCATTC
12	7552027	7552028	97	CTTCTTCTTCCTCTTCCTCTTCCTCCCTTTCCCTTCTTTCCTTCCTTCCTTCTTCTTCCTCTTCCTCTTCCTCCCTTTCCCTTCTTTTCCTTCCTTCC
12	75573544	75573545	123	CTATAAAAGATATAAAACTACTTTTATATCTTTTATAAAAACTATAAAAGATATAAAACTACTTGTATATCTTTTATAAAAACTATAAAAGATATAAAAGTAGTTTTATATCTTTTATAGTTTT
12	75931098	75931099	319	GAAAATAATCTTCGGCCGGGCGTGGTGGCTCACGCCTGTAATCCCAGCACTTTGGGAGGCCGAGATGGGCGGATCACGAGGTCAGGAGATCGAGACCATCCTGGCTAACACGGTGAAACCCCGTCTCTACTAAAAATACAAAAATTAGCCGGGCATGGTGGCGCACGCCTGTAGTCCCAGCTACACGGGAGGCTGAGGCAGGAGAATGGCATGAACCCGGGAGGCGGAGCTTGCAGTGAGTCGAGATCGCGCCAC
12	75969430	75969431	58	TCAATTAAGAAATATATATTTCTTAATTTTCAATTAAGAAATATATATTTCTTAATTTT
12	78084561	78084562	92	TTTATATATACATATATATTAAAGTGGGGATTATTCTAAACTACAACCATGGATGATTGTAAATGATTATACATAAAATAATGAATACATATA
12	7841445	7841446	642	CCTCCGAGTAACTGGGACTACAGCACCCACCACCACACCCGGCTAATTTTTTGTATTTTTAGTAAGAGACGGGGTTTCAACCGTGTTAGCCAGGATGGTCTCAATCTCCTGACATCGTGATCCACCTGCCTCAGCCTCCCAAAGTTCTGGGATTACAGGGGTGAGCCACCGTGCCCGGCTCATTGTACATATAATTTTATTTTATTTTATTTATTTAATTTTGAGGGCTGGGTGCGGTGGCTCACACCTGTAATC
12	785369	785370	136	GCCCACCACCACACCCAGCTAATTTTTTGTATTTTTAGTAGAGATGGGGTTTCACCGTGTTGGCCAGGATGGTCTCAAATCTCCTGACCTCGTGATCCGCCCGCCTCGGCCTCCCAAAGTGCTGGGATTACAGGCGT
12	80383079	80383080	117	AAGGTTTTTAAGCAGAGGAAGCTGCCACTTTCTGGGTCATTACCACCTCTCCCTCATGCTCTCTAACCCCACCTAAGCAGTATATTACATGAACTTTTTATCTCCCACTACTATTCCT
12	82036470	82036471	57	TATACATACATGTATGTATATATTATATACATACACGTGTATATGTATATATTATATT
12	8384126	8384127	975	GTGTGGGGAAAAGCAAGAGAGATCAGATTGTTACTGTGTCTGTGTAGAAAGAAGTAGACATAGGAGACTCCATTTTGTTATGTACTAAGAAAAATTCTTCTGCCTTGAGATTCTGTTAATCTATAACCTTACCCCCACACCTGTGCCTCTCTGAAACATGTGCTGTGTCAACTCAGAGTTAAATGGATTAAGGGCGGTGCAAGATGTGCTTTGTTAAACAGATGCTTGAAGGCAGCATGCTCCTTAAGAGTCATC
12	8384742	8384743	155	GGGATGTGGCAGCTGCAGCGGGCTTGGCTTTTTGAGGAACCGAGTGAGTCCAGGATGTGGCAGCTGCAGCGGGCTTGGCTTTGTGAGGAACAGAGTGAGTCCAGGGATGTGGCAGCTGCAGCGGGCTTGGCTTTGTGAGGAACCGAGTGTGTCCAG
12	8385554	8385555	1713	TGGCTCACGCCTGTAATCCCAACACTTTGGGAGGCCAAGGTGGGGGATCACTTGAGGTCAGGAGTTCGAGAGCAGCCTGGCCAACATGGTGAAACCCATCTCTACAAAAATACAAAAATTAGCCAGGCATGATGGCGGGTGCCTGTAATCCCAGCTACCTGGGAGGCTGAGGTAGGAGAATTGCTTGAACCCAGGAGGCAGAGGTTGCAGTGAGCTGAGATTGTGCCACTGCACTCCAGCCTGAGTGACAGAGTG
12	84615107	84615108	51	ATGCATATATATGCATGTATATGCATGTATATAGTATATACATGCATATATA
12	84900444	84900445	94	GCCAAACTCAGCAACCTCCTCTGGTTAGTCTAAGATTCCCTTTATCAGTCTTTCCCAGAGCTCAAATCCCAGAAGAGCAAAAGGCAGAACCTAGC
12	84965133	84965134	957	TTTTTTTTTTTTTTTTTTATGGTCATTTTAATAATATTAATTCTTTTTTTTTATTATACTCTAAGTTTTAGGGTACATGTGCACATTGTGCAGGTTAGTTACATATGTATACATGTGCCATGCTGGTGCGCTGCACCCACTAATGTGTCATCTAGCATTAGGTATATCTCCCAATGCTATCCCTCCCCCCTCCCCCGACCCCACCACAGTCCCCAGAGTGTGATATTCCCCTTCCTGTGTCCATGTGATCTCATT
12	86874310	86874311	77	GTACATATCTATATATGTATACATACATATGTATTTGTGTACATATCTATATATGTATACATACATATGTATTTGTGT
12	87204806	87204807	110	TTTAAAAAATGTAGACTAGAATGAAAATACATATGGAGCATACAAAAATGCAAGAGATGCAGCTAAAGCAATGCTGAGAGAAAAATGTATAGCATGAAGTGCTTACATTGC
12	87870817	87870818	324	CAGGGCCGGGCGCGGTGGCTCACGCCTGTAATCCCAGCACTTTGGGAGGCCGAGGCGGGTGGATCACGAGGTCAGGAGATCGAGACCATCCTGGCTAACACGGTGAAACCCCGTCTCTACTAAAAATACAAAAAATTAGCCGGGCGTGGTAGCGGGCGCCTGTAGTCCCAGCTACTCGGGAGGCTGAGGCAGGAGAATGGCGTGAACCCGGGAAGCGGAGCTTGCAGTGAGCCGAGATCGCGCCACTGCACTCCA
12	88111349	88111350	93	TATATATATTTGGTATATATATGTATATATATATGATATATATATATTTGTTATATATATGTATATATGTATATATATGATATATATATTTGTT
12	88338160	88338161	308	TAAAAGAAAATGGGCCGGGCGCGGTGGCTCACGCCTGTAATCCCAGCACTTTGGGAGGCCGAGGCGGGCGGATCACGAGGTCAGGAGATCGAGACCATCCCGGCTAAAACGGTGAAACCCCGTCTCTACTAAAAATACAAAAAATTAGCCGGGCGTAGTGGCGGGCGCCTGTAGTCCCAGCTACTTGGGAGGCTGAGGCAGGAGAATGGCGTGAACCCGGGAGGCGGAGCTTGCAGTGAGCCGAGATCCCGCCAC
12	88520877	88520878	69	ATCTTTCTCCTGTTGAAATTAAATTTCATTTTTATTATATACTCCTTTTGAATTAAATAATTTTGGAGTC
12	90617339	90617340	541	ATATATATAGTATATATGTATATATATAGGATATATATACTATAGTATATATGTATATATATAGGATATATATACTATAGTATATATATAGGATATAGTATATATGTATATATATAGGATATATATACTATAGTATATATATAGGATATATATACTATAGTATATATATAGGATATATATACTATAGTATATATATAGGATATATATACTATAGTATATATATATAGGATATATATACTATAGTATATATATATA
12	92001715	92001716	84	CATATGTATTATACATACATATATATGTATTATACATACATATATATGTATTATACATACATATATATGTATTATACATACATAT
12	9369239	9369240	310	GGCCGGGCGCGGTGGCTCACGCCTGTAATCCAGCACTTTGGAGGCCGAGGCGGGCGGATCACGAGGTCAGGAGATCGAGACCATCCTGGCTAACACAGTGAAACCCGTCTCTACTAAAAAAACACAAAAAAATTAGCGGGCGTGGTGGCGGGCGTCTGTAGTCCCAGCTACGCGGAGGCTGAGGCAGGAGAATGGCCGTGAACCGGGAGGCGGAGCTTGCAGTGAGCCGAGATCGCGCCACTGCACTCCAGCCTG
12	94987170	94987171	69	GGAAGAAGAAAAGAAGAGGAAGAGGAAGAGGAAGAGGAAGAGGAGGAAGAGGAAGAGGAAGAGGAAGAGG
12	9555365	9555366	207	TGAGGACCCCCACCGCGGATTCTAAGATCCTTAGCACCCACCTGGAGGACTGTGGGTTTTAGGTGTCCAAGAAGAAAGCTCAGATCTGCCGACGGCAGGTGCCTTACTTGGGATTTACTATCCGACAGGGGTCTGAACGCAGCTCGGGATCAGAAAAAAAGCAGGTCATTTGCAATGTACCGGAACCAGCCCCTCTTCCCCCCTTGCT
12	95589474	95589475	198	CCAGGCGTGGTGGCTCACGCCTGTAATCCCAGCACTTTGGGAGGCTGAGGCGGGCGGATCACCTGAGGTCGGGAGTTCGAGACCAGACCTGGCCAACATGGCCAACATGGCCAACGTGGCCAACATGGCCAGGTCTGGTCTCGAACTCCCGACCTCAGGTGATCCGCCCGCCTCAGCCTCCCAAAAGTGCTGGGATTTA
12	95749278	95749279	319	TGCGGTGTCTCATGCCTGTAATCCAGCACTTTGGGAGGCCGAGCGGGTGGATCACGAGGTCAGGAGTTCAAGACCAGCCTGGTCAACATGGTGAAACTCCATCTCTAACTAAAAATACAAAAAAAAAAAAAAAATTAGCCAGGCATGGTGTCGGGCACCCTATAATCCCAGCTACTTGGGAGGCTGAGGCAGGAGAATTGCTTGAACCTAGGAGGAGGAGGTTGCGTTGACCTGAGATTGTGCCATTGCACTCCA
12	96705378	96705379	321	TAGAAATGCCATTAACGCGCCGGCGCGCGGTGGCTCACGCCTGTAATCCCAGCACTTTGGGAGGCCGAGGCGGGCGGATCACGAGGTCAGGAGATCGAGACCATCCCGGCTAAAACGGTGAAACCCCGTCTCTACTAAAAATACAAAAAATTAGCCGGGCGTAGTGGCGGGCGCCTGTAGTCCCAGCTACTTGGGAGGCTGAGGCAGGAGAATGGCGTGAATCCGGGAGGCAGAGCTTGCAGTGAGCCGAGATCC
12	9871158	9871159	336	TATGAATTTTGGGCCGGGCGCGGTGGCTCACGCCTGTAATCCCAGCACTTTGGGAGGCCGAGGCGGGTGGATCATGAGGTCAGGAGATCGAGACCATCCTGGCTAACAAGGTGAAACCCCGTCTCTACTAAAAAAAAAAAATACAAAAAAAATTAGCCGGGCGCGGTGGCGGGCGCCTGTAGTCCCAGCTACTCGGGAGGCTGAGGCAGAGAATGGCGTGAACCCGGAGGCGGAGCTTGCAGTGAGCCGAGATTG
13	100082628	100082629	320	CAACAGATGGATGGATAGGCCGGGCGCGGTGGCTCACGCCTGTAATCCCAGCACTTTGGGAGGCCGAGGCGGGCGGATCACGAGGTCAGGAGATCGAGACCATCCTGGCTAACACGGTGAAACCCCGTCTCTACTAAAAATACAAAAAATTAGCCGGGCGTGGTAGCGGGCGCCTGTAGTCCCAGCTACTCGGGAGGCTGAGGCAGGAGAATGGCGTGAACCCGGGAGGCGGAGCTTGCAGTGAGCCGAGATCCC
13	101104170	101104171	1331	TCCTCTCCTCTCTCTCCTCTCTCTCCTCTTCCTCTCTCTCTTCTTCCTCTCTCTGCTCTTCCTCTCCTCTCTCCTCTTCCTCTCCTCTCTCTCTTCTCTCCTCTCTTCTTCCTCTCTCTCTCCTCTCTGCTCTCTCCTCTTCCTCTCGTCTCTCTCTTCTCTCCTCTTCTTCCTCTCTCTCCTCTTCCTCTCTCTCTTCTTCCTCTGTCTTCTCTTCCTCTCCTCTCTGTCTCTCTCCTCTTCCCCTCTTTTCTC
13	101986771	101986772	488	TGAATGTATGTATTCATCCCATTCTTCCTGGAATGCCTCTCTCTCCATTCTCCTCTTGAATGTATGTGTTCATCCCATTCTTCCTGGAATGCCTGTCTCCATTCTCTTCTTGAATGTATGTGTTCATCCCATTCTTCCTGGAATGCCTCTCTCCATTCTCTTCTTGAATGTATGTATTCATCCCATTCTTCCTGGAATGCCTCTCTCCATTCTCTTCTTGAATGTATGTATTCATCCCATTCTTCCTGGAATGCC
13	102389369	102389370	337	AGAGGGCCGGGCGCGGTGGCTCACGCCTGTAATCCAGCACTTTGGGAGCCGAGGCGGGTGGATCATGAGGTCAGGAGATCGAGACCATCCTGGCTAACAAGGTGAAACCCCGTCTCTACTAAAAAATACAAAAATTAGCCGGGCGCGCGTGGCGGCGGCGCCTGTAGTCCCAGCTACTCGGGAGGCTGAGGCAGGAGAATGGCGTGAACCCGGGAAGCGGAGCTTGCAGTGAGCCGAGATTGCGCCACTGCAGTC
13	103428451	103428452	56	ATATATATGATATGTATGTATATACATATATATGTATATGTATATACATATATATGA
13	104296221	104296222	1037	ATGTCCTTGCCCACTTTTTTTTTTATTTTTTTTTATTTTTATTTTTTTATTTTTAATCTATTATTATTATTAATACTTTAAGTTTTAGGGTACATGTGCACATTGTGCAGGGTTAGTTACATATGTATACATGTTGCCATGCTGGTGCGCTGCACCCACTAACGTGTCATCTAGCATTAGGTATATTCTCCCAATGCTATCCTCTCCCCTCCCCCGACCTCACCACAGTCCCAGAGTGTGATATTCCCTTCCTGT
13	104897322	104897323	1141	CTATATATGTATATATATATATACATGAATATATGCATATATTATACATGAATATATGCATATATTATACATGAATATAATATAGGCATATATTATACATGAATATATATAATACATGAATATATGCATATATATTATACATGAATATAATATATACATATATTATACGTGAATATATGTATAATATATACATGAATATATGCATGCATATTATATGTATATATATTATACATGAATATATGCATGTATAATATA
13	105177219	105177220	60	CACGCGCGCACACACACACACATATACACATACATATGTACACATATATACACACACGCGC
13	105177372	105177373	200	GCGCGCACACACACATACACACATACATATGTACACATATATACACACGCGCGTGCGCACACACATATATACACATACATATGTACACATATATACACACGCGCGCACACACACACACATATACACATACATATGTACACATACATACACGCGCGCGCACACACACATATATACACATACATATGTACACATACATACACG
13	105177495	105177496	193	CATACATATGTACACATATATACACACGCGTGCGCACACACACAACATATATACACATACATATGTACACATATACACACGTGCGCGCACACACACATATACACATACATATGTACACATATATACACACGCGCGCGCACACACACACACATATATACACATACATATGTACACATATATACACACGCGCGTGC
13	105217122	105217123	124	GCTGACAATTATACACACATGCTCAGACACACACACAACTCACAAGCTAACACACCCACACACATGCTCTCTCACACACACACATGCTCATACACACACATGGGCTACACTCACCCTCACAGACA
13	105408659	105408660	86	GTATGTTGACTGGTTATTTTGTGTTCCTGTGGTTGAATTTTCCTGTCATTGAGGAGATGATAGAAGGGGAACAGATAGGAAAAGGAA
13	105412259	105412260	52	CATATATGTATATATATAGATACATATGTGTATATATATATATACATATATGT
13	105714924	105714925	293	AGTCTTTGGGAGGCCGAGGCGGGTGGATCATGAGGTCAGGAGATCGAGACCATCCTGGCTAACAAGGTGAAACCCCGTCTCTACTAAAAATACAAAAAATTAGCCGCCGGCGGCGGTGGCGGGCGCCTGTAGTCCCAGCTACTCGGGAGGCTGAGGCAGGAGAATGGCGTGAACCCGGGAAGCGGAGCTTGCAGTGAGCCGAAATTGCGCCACTGCAGTCCGCAGTCCGGCCTGGGCGACAGAGCGAGACTCCGT
13	106297135	106297136	71	TCCCTCCCTCCTTCCTCCCTCCCTCCTTCCCCTCCCTCCCTTCCTCCCTCCCTCCTTCCTTGCTCCCTCCTT
13	107046953	107046954	142	TGAGGGTCCACAAAAGAACATCCAGTGCAGGTCCTCGAATCATGGTGATAGTGGTTGAAGGAGCTAATGCATGAGGGTCCACAAAAGAACATCCAGTGCAGGTCCTCGAATCATGGTGATAGTGGTTGAAGGAGCTAATGCAT
13	108539742	108539743	63	GATTTCCCCCTTGCTCTTCTCATAATAGTGAGTTCTCATGAGATCTGGTTGTTTAAAAGTGTGC
13	108768405	108768406	74	CCATGTGGGCTGGAGTGTGAACTTCACGGAAGACCCTAATAGGATCCTAGTTCATACCACTGGGAGTCGATGAAA
13	108930934	108930935	614	CCTCTTCCTCCTCCTCTGCTCCTGTCCTCCTCTTCTTCCTCCTCCCTTTTCCTCTTCCTCCTCCTCCCTCCTCTCCTCCTCCTCCTCTGCTCTGCTCCTCCTCTTCCTCCTCCTCCTCTTCTCCTCTCCCCTCCTTTCCTCCTCCTCCCCTTCTCTTCTTCCTCCTCCTCCACTTCTCTCCCTCCTCCTTCTCCTCTCCCTCCTCCTCCCCTCCTCCCCTCCTCCTCCTCTTCCTCTCCTCCTGCTCTTCCTCCT
13	109887539	109887540	62	ATATCTGTTGGCTTTATCAGGGGTTTCTGATACTGTTCTCGTGGTAGTGAATAAGTCTCACAA
13	110045068	110045069	70	GGAAGGAAGGAAGGAGAGAAGGGAAGGAAGGAAGGAGAGAGAGAAGGAAGGAAGGAAGGAGAGAAGGGAAG
13	110695952	110695953	192	GTGTGAGTCGCTCTGTGTGTGGTCTGTGTGTGTGGTGTGTGTCTGTATTTGTGTGTGTGTGTGTGTGTCTGTGTGGAATGTGTGTGGTGTGTGTCTCTGTGTGTGGTTTGAGTGTCTGTGTGGTATGTGTGTATTTGTGTGTATATGTCTGCGTGTTGTGTGTGTTTTGTGTATGGTGTGTATGTGTGTGTGG
13	110905163	110905164	66	TATAGTTATCTGTATATGTAATACATACGTACTTATAGTTATCTGTATATGTAATACATACGTACTT
13	111131811	111131812	74	TCTGCCTCTGCTGGGGTGGTCCCCCTTTCCTAGAGAGCACCCCACATTCCAGTCCCAGCCTTCTCCCCCGCTGGC
13	111300032	111300033	78	AGCCCAAAGGGGAGGGAGGAGCAGTCCCCAGACCTGGCTTTAGAGTCTGTGGGTGTTTCTTAGGCCATCTGGATGAGGA
13	111580941	111580942	191	GGGGAAACAGGTACTCTCTCAAACATTGTTGGTGCAAGTATAAATTAGCCAAAATACATTGGTAGCAGCCTCATTGACAATTTTTAAAGTGCAAATTAACAGTGGCATATGGTGGGTGCTTAATAAATACTTGTTGAATGAATTATTTTTGCATAAAACTATGGGTAATACCCAATATTAGCCAGGGTGTGT
13	111590547	111590548	192	TCTCCAGGACATGCGCAGAGTGTTCCAGACCAGAGTCAGGATCCACAGCTGCTCCTCCTTTAAGAGTTAATTTCATTCTCTTTTCAGATTTGTTGATACCTTCCTCCTTGACCTGGCCCTTGCTTTTTTTGGAGAGCACAGCTCCTGACTTCCCTCTTGGGGCTACGACTTCAACAGGCTCTGCCTTCACCTC
13	111703603	111703604	117	CATGTGAGTGGGTGCATGGGTTTGCACATGCATGCATGTGTGTGAGTGGGTGCCTATGTCTATGTGTGCATGCATGCATGTGTGTGAGTGAGTGCCTATGTCTATGTGTGCATGCATG
13	112087485	112087486	508	TAGATGGATGGATGAATAGGTGGGTGGATGTGTGAATGGATGGATGGGTTAAGTGTGGTGGGTGGGTGGGTGGATGGATGGATGGATGGATGGATGTGTGAATGGGTGCGTGGATGAGTGGATGAATAGATGGATAGATGGATGAGTGGGTAGGTGGTGGATGTGTGGATGTAGGAATGCGTTGGGTGGGTAGGTGGATGTATGGATGGATGGATGAATAGGTGGGTGGATGTGTGAATGAATGGATGGATGGGT
13	112220396	112220397	966	ATTGAAAGATACTCCGAGGACAGTGTGGGGGGTGACAAGGTCCAGTGTGTTGAAAGATACTCTGAGGGCAGCATGGGGGCGACAAGGTCCAGTGTGTTGAAAGATACTCTGAGGACAGCATTGGGGGTGACAAGGTCCAGTGTGTATTGAAAGACACTCCGAGGGCAGCGTGGGGGTGACAAGGTCCAGTGTGTTGAAAGATACTCCAAGAACAGCGTGGGGGCAACAAGGTCCAGTGTGTTGAAAGATACTCCG
13	112263394	112263395	54	GTCCTGTCTACACTGGACGATGGGACTCTGGGCCTCCAGAAGGCGGTGACTGCAG
13	112273965	112273966	664	TGGTGTGTGTGGTATGTGTCTGTATGGTATGTGTATGTGTGGTATATGTGTGTGGTGTGTGTCTGGTGTGTGTGTGGTGTGTGTCTGTGGTATGTGTGTGTGTTGTGTGTGGGTGTGTGTGTTGTGTGTGGTTTGTGTGTCTGTGGTGTGTGTGGTGTGTGGGTGTGTCTGTGGTGTGTGTGTGGTGTGTGTGTGGTATGTGTCTGGTAAGTGTATGTGTGGTGCATGTGTGTGGTGTGTGTGTGGTGTGTTTGG
13	112733082	112733083	88	CTGTGTGCTGTGTGTTGTGTTGTACTGTGTTGTGTTGTGCTGTGCCGTGTGTTGTGCTGTGCTGTGTTGTGTTGTGCTGTGTGTTATAT
13	112803326	112803327	64	CCCTGACCCCATGTGATGGTCCCTGTGGAAGCCCTGACTCCCAGTGTGATAGTACCTGTGGAAAC
13	112803850	112803851	292	CCTGTGTGATGGTATCTGTGGAAGCCCTGACCCCGGTGTGATGGTATCTATGGAAGCCCTGGCCCCGGTGTGATGGTATCTGTGGTAGCCCTGACCCCCAGTGTGATGGTACCTGTGGTAGCCCTGACCCCAGTGTGATGGTACCTGTGGAAGCCCTGACTCCCAGTGTGATGGTACCCGTGCAATCCCTGACCCCAGTGTGATGGTACCTGTGGAAGCCCTGACCTTGGTGTGACAGTATCTTTGGAAGCCCTG
13	112849976	112849977	52	GAGGAAGGGAAAGAGGAAGGGAAAGAGGAAGGGAAAGAGGAAGGGAAAGAGGA
13	112993791	112993792	331	TTAATTTTTTTTTTTTTTTTTTTTTTTTTTTTTTTTTTTTTGAGACGGAGTCTCGCTCTGTCGCCCAGGCTGGAGTGCAGTGGCGCGATCTCGGCTCACTGCAAGCTCCGCCTCCCGGGTTCACGCCATTCTCCTGCCTCAGCCTCCCAAGTAGCTGGGACTACAGGCGCCCGCCCACTACGCCCGGCTAATTTTTTGTATTTTTAGTAGAGACGGGGTTTCACCGTTTTAGCCGGGATGGTCTCGATCTCCTGA
13	113299766	113299767	99	GTCCTCGGTGTCCTCGCCGTCCTCGGTGTCCTCGCCATCCTCACCATCCTCACTGTCCTCGCCATCCTCGCCATCCTCAGAGTCCTCGCCATCCTTGCCA
13	113441850	113441851	385	ACACCGTGTGTCCTGATGCGTAGACCCCTGTGGAGACCTACTTAATCCACACCGGGTGTCCTGATGCGTAGACTCCTGTGGAGACCTACTTAATCCACACCGCGGTGTCCTGATGCGTAGACCCCTGTGGAGACCTACTTAATTCACACCAAGTGTCCTGATGCGTAGACCCCTGTGGAGACCTACTTAATCCACACCGGTGTCCTGATGCGTAGACCCCTGTGGAGACCTACTTAATCCACACCGGGTGTCCTG
13	113520952	113520953	312	CCTTCTGGGTGACTTCTTTTTTTTTTTTTTTTTTTGAGACGGAGTCTCGCTCTGTCGCCCAGGCTGGAGTGCAGTGGCGGGATCTCGGCTCACTGCAAGCTCCGCCTCCGGGTTCACGCCATTCTCCTGCCTCAGCCTCCCAAGTAGCTGGGACTACAGGCGCCCGCCACTACGCCCGCTAATTTTTTGTATTTTAGTAGAGACGAGGTTTCACCGTTTTAGCCGGGATGGTCTCGATCTCCTGACCTCGTGATC
13	113548156	113548157	76	AGGGCGATCCCAGCTAGGGCGATCCCAGCTAGGGCGATCCCAGCTAGGGCGATCCCAGCTAGGGCGATCCCAGCTGG
13	113592317	113592318	246	GAACCAACTCATCAGAGCTTCACCTGAACCAACCAACCACCTGAACCAACCACTCAGAGATCAGCTGAATGAACCAACCACTCAGAGATCACCTGAACCAAGCAACCAATCAAAACTCACCTGAACCAGCACATCAGCACTCACCTGAACCAACCAATCACAGTTCACCTGAACCAACCAATCAGAGCTCACCTGAACCAGCTCATCAAAACTCCCCTGAACCAATGCCTCAGAGCTCACCTGAACC
13	113627113	113627114	944	CTCCATCCATCCACCCACCCACCCACCCACCCATTCATCCATACATCCAATCACTCATCCACCTACACATCCACCCATCCATTCATCCATCCATCTACCTACCCATCCATTCATCCATCATCATTCATCCATCCATCCAGTCATCTATCCATCCACCACCCACTCACCCACCCATCCATCATCATCCATCCATCCGGTCATCCATCCATCCATCCATCCATCCACTTATTATCTACCCACCCACCCATCCATCTA
13	113734110	113734111	178	ACTCTCCTCGGTATGGACACTCCTCTGCCTGGACTCTCCTCCATATGGACACTCCTCTGCCTGGACTCTCTCCTCCGTATGGACACTCCTCTGCCTGGACCCTCCTCCGTGCGGATAGCCTTCTACCTGGACCCTCTTCTGTGTGGACCCTCCCTTGCCTGGACGTTCCTCTGCCTGGA
13	113743699	113743700	140	CCGTCTGGGTTTAACTTAGAAGTGTGTGGCCCCTCAGAAGCAGAGGGTGGGCGCGTCTGCTCTCATCCAGCCCGTCCGGGTTTAACTTAGAAGTGTGTGGCCCTCAGAAGCAGGAGGGTGGGCGTCTGCTCTCATCCAGTC
13	113830824	113830825	577	GGTGACAGGCATGTGCCACCACACACCCGGCTCTCTTCCTCTTACAAGGCCACAGTTCTGTCGGGGCAATTCCCCGCCTCGGCCTCCCAAAGTGCTGGGTGACAGGCATGTGCCACCACACCCGGCTCTCTTCCTCTTACAAGGCCACAGTTCTGTCGGGGCAATTCCCCCGCCTCGGCCTCCCAAAGTGCTGGGGTGACAGGCATGTGCCACCACACCGGCTCTCTTCCTCTTACAAGGCCACAGTTCTGTCGG
13	113917483	113917484	1179	TTATACGTGCCCTTGCTGATGGCAGATGTCGGGTCTGCCTCGCTTATACGTGCCCTTGCTGATGGCAGATGTCGGGTCTGCCTCGCTTATACGTGCCCTTGCTGATGGCAGATGTCGGATCTGCCTCGCTTATACGTGCCCTTGCTGATGGCAGATGTCGGATCTGCCTCGCTTATACGTGCCCTTGCTGATGGCAGATGTCGGATCTGCCTCGCTTATATACGTGCCCTTGCTGATGGCAGATGTCGGATCTGC
13	113986698	113986699	51	GCACGTGTGGCCGTGCGTGTGCACGTGTGTACCTGTGTGGCGTGCGTGTGCA
13	114011393	114011394	134	GAGGCGGGCGGATCATGAGGTCAAGAGATCGAGACCATCCTGGCCAACATGGTGAAACCCTGCCTCTACTAAAAATACAAAAATTAGCTGGACGTGGTGGCTCATGCCTGTAATCCCAGCACTTTGGGAGGCCAA
13	114058416	114058417	229	CTGACCCTGAGCCTCTATGTGGGTCTGCTCCCAACCCTGTTCCCAAGCCCGTTCCTGAGCCCCTTTCTGGGTTCTGCCTCTGAGTCTCTATCTGGGTCTGCTCCCAGCCCTGATTCCGAGCCCGATCCCGAGCCCATTCCTGAGCCCCTTTCTGGGCCTGACCCTGAGCCTCTATGTGGGTCTGCTCCCGACCCTGTTCCTGAGCCCGTTCCTGAGCCCCTTTCTGGGCC
13	114079008	114079009	1038	GGGTGGATGGATGAGTGGATGGGTGGGTGGATAGGTGAATGGATGAGTGGATGGGTGAATGGGTGAGATGGCTGGGTGGGTGGGTGAATGGGTGGGTGGGTGGATGGATGAATGGATGGGTGAATGGGTGGGTGGGTATATGGATGGGTGGGTGGGTGGTGGAAGGGTGGGTGAATTAATGGGTAGGTAAATGGGTGGGTGAATGGATGGGTGGATGGATGAGTGGGTGGGTGAATGGATGAATGGATGGGTGGA
13	114090844	114090845	211	GCGGGTCCCGGGGTACACCTGTGTTCACTCTACGTGTGGATGCTGGGTCCCGGGGTACACCTATGTTCACCTTGCGCCTGGGTGCTGGGTCCCAGGGTACACCTATGTTCACTCTGTGCCTGGGTGCTGGGTCCCGGGGTACACCTATGTTCACTCTCTACATGTGGGTGCTGGGTCCCGGGGTACACCTGTATTCACCCTGCACCTGGGTG
13	114455364	114455365	200	CCGGCCGGCTCCGTGGCTGAGGAGGCGGTTTCTTTCGGGTTCTGCCGGCTCCGTGGCTGAGGAGGCGGTTTCTTTCCGCGCCGCGCCGGCTCCATGGCTGAGGAGGCGGTTTCTTTCCGGCCGCGCCGGCTCTGTGGCCGAGGAGGTGGTTTCTTTCCCGTTGTGCCGGCTCCGTGGCTGAGGAGGCGGTTTCTTTCTGGT
13	114532379	114532380	92	CTTCTTGGCTCAGGTGTGGATCAGGTGGTCTCCCTGAGGTTGGGACCCTCTTGGCCCAGGTGAGGATCAGGTGGACTCCCTGAGATTGGGACC
13	114544443	114544444	61	GTGGGGCATATGGAGGAAACTGTGGGGCGTACGGAGGAAATTGAGGCATATGGAGGAAACTG
13	114544544	114544545	120	CTGTGGGGTGTATGGAAGAAACTGGGGGCGTATGGAGGAAATTGAGGCATATGGAGGAAACTGTGGGGTGTATGGAGGAAACTGGCATATGGAGGAAACTGTGGGCGTATGGAGGAAACTG
13	114793683	114793684	154	CGGGGGCAGGACCCCTAAAACAGTGTCATCCTGGGGGCCAAGACGCCTAAAACAGCATCATCTGGGAGCCAGGACCCCTAAAACAGCATCATCCTGGGGCCAGGACCCCTAAAACAGCATCATCTGGGAGCCAGGACCCCTAAAACAGCATCATC
13	114818522	114818523	135	GGGAGAGACCCCCGCTGCTGACTGTACTTAGAGTCCTCGCTCCTGGGGAGAAATCGCCACTGCTGACTGTGCGTAGAGTCCTCGCTCCTGGGGGAGAGACCCCCGCTGCTGACTGTGCTTAGAGTCCTGGCTCCTG
13	114818659	114818660	181	GGGGAGAGGACCCCTCTGCTGACTGTGCTTAGAGTCCTGGCTCCTGGGGGAGAGACCCCCGCTGCTGACTGTACTTAGAGTCCTCACTACTGGGGAGAGGCCCCCGCTGCTGACTGTACTTAAAGTCCTTGCTCCCGGAGGAGAGGCCCCTGCTGCTGACTGCCCAGCCGCCCTAGCTCCTG
13	114885074	114885075	248	AGAGGGGAGGGGGGCCCTGATCGACGCCAGGCTGGAGAGGGGAGGGGGGGCCCTGATCGACGTCTGGCTGGAGAGAGGGAGGGGGGCCCTGATCGACGTCTGGCTGGAGAGAGGGAGGGGGGGCCCTGATCGACGTCTGGCTGGAGAGGGAGGGGGGCCCTGATCGACGTCTGGCTGGAGAGGGAGGGGGGCCCTGATCGACGTCTGGCTGGAGAGAAGGGGGGGACTTGATCGACGCCTGGCTGGAGA
13	19227170	19227171	545	TGTGTAATTCTTTGATCCAGTTGTAGTCTGACTTTTGAAAGCTGACTGTAGAAAGAGGAATATTTAGAAAAATAGGCAAAGTGATGTTATGGTTTAAAATCATCAAGTGGGAAATCCAAAACCACGGTTCTCAACCTTAGCTACTCATGGAAACCACCTGGAAATTTTTAAAAATACTGATGGATGGGTTCCATGCCCATAGATTTTTAAAAAATTCTTCCAAAGGATTCTGACATCCTAATCAGGGTTGAAAGC
13	19642438	19642439	367	TGTGGCTGTGTTGGTGTGATGGTGATGATGTGGTGGTGATGATAGTGGTTGAGATGATGAAGGTGTGGTAATTGCTGGTGTCTGGTGTGATGGTGATGATGGTGGTAGTTATGATAGTGGTGAGATGATGATGGTGTAGCAATGTGGTGATGGTGTGTGGTGATGATGATGAGTCGGTGCTGAAGTGATAGTTGAGATGATAATGGTGTGATGGTGATGATAGTGGTTGAGATGATGATAGTGTGGGTGGTGGTG
13	19825796	19825797	423	GGAGGTTCTATTTTGGTGTCTGTGGAGGTTTTGTTTCAAGGTTTAGAGCTCCTTTTAGCATTTTTTGTGCTGGCTTGGTAGTGGTGAATTCTCTCAGCATTTTTTGTTGGAAAAGGACTTTACCACTCTTCATTTAGGAAGCTTAGTTTCACTAGATACAAAATTTTTAGCTGATAATTTTTTTGTTTAAGGAGGCTAAAGATAGAATGCCAATTATTCTGGCTTGTAGGGTTTCTGCTGAGAAATCTGCTGTTA
13	20460102	20460103	129	TGTGTATACACATATATGTGTGTATACACATATATGTGTGTATTACACATATATGTGTGTATACACATATATGTGTGTATACACATATATGTGTGTATACACATATATGTGTATACACACATATATATGT
13	21899453	21899454	839	TGGTTTTAAAGCCCAAACTCTTTAGCATCATATGAAAACCACGTAATTTTCAGAGATGAATGCATTGTGCCTGCCTGGGAAGTACATGCAGTCTTGTTAACTAAGCACTGTTGTGATGGTTCATTTTACATGTCAACTTGGCAAGGTCATGTGTGTTCATTTGCTGTGGCTGCCACATAAAATACCACAGACTTGGTGGCTTAAACAACAGAAATTTATTTTTCACAGTTCTGGAGGCTGGAAGTCCAAGATCAA
13	21913153	21913154	89	GGACAAATGAGACTGGGTGAGGGCAGGTGAGGTCAGGTGAGACTGAATGAGGGCAGGTGAGGCAGGTGAGGCAGGTGAGGGCAGATGAGA
13	22300003	22300004	2452	GATGGTGGTGGTGATGGTGGTGGTGGTGGTGGTGATGGTGGTGGTGGTGAGGTGGTGGTGATGGTGGTGGTGGTGGTGATGGTGATGGTGGTGGTGGTGGTGGTTGTGGTGGTGGTGATGGTGGTGGTGGGTGGTGATGGTGGTGGTGGTGGTGGTGATGGTGGTGGTGATGGTGGTGGTGGTGGTGGTGATGGTGGTGGTGATGGTGGTGGTGGTGGTTATGGTGATGGTGGTGATTGTGGTGTGATGGTGGTG
13	22489793	22489794	217	TTTTTTTTTTAATTTTTTTTTTATTATACTCTAAGTTTTAGTGTACATGTGCACATTGTGCAGGTTAGTTACATATGTATACATGTGCCATGCTGGTGCGCTGCACCCACTAACGTGTCATCTAGCATTAGGTATATCTCCCAATGCTATCCCTCCCCCCTCCCCGACCCCACCACAGTCCCCAGAGTGTGATATTCCCCTTCCAGTCATCAGAATTT
13	23023804	23023805	84	TTTCATTAGCTGTGACAAGCCATGGTAATGAATGATGTTAATTATAGGGAAAACTGGATGCAAGTTTTCCCTATAATTAACATCA
13	23253554	23253555	356	GGCGACTGTGGTGGTGGTGGTGGTGGTGACGATGCCGGTGGTGGTAACAGTTGTCATGGTGGTGGCAGTAATTGTGGTGGTTGTGATGGTGATGGTGAAGGTGGTAGTGGTGTTGGTGTTGGTGGTGAAGGTGGTGGTGGTGGTTGTGGTTGCCAAGGTAGATGGTAGTGGTGATGATAGTAGTTGTGGTTAAGATGGTGGTGATTAGCAGTTGTGGTGGTGGTTGTGAAGGTAGTGGTGATGAAGGTGATTGTG
13	23662918	23662919	330	TGGCCGGGGCGCGGTGGCTCACGCCTGTAATCCCAGCACTTTGGGAGGCCGAGGGCGGGCGGATCACGAGGTCAGGAGATCGAGACCATCCTGGCTAACACGGTGAAACCCCGTCTCTACTAAAAATACAAAAAATTAGCCGGGCGTAGTGGCGGGCGCCTGTAGTCCCAGCTACTCGGGAGGCTGAGGCAGGAGAATGGCGTGAACCCGGGAGGCGGAGCTTGCAGTGAGCCGAGATCGCGCCACTGCACTCCA
13	24482741	24482742	339	AGGCCGGCGCGCGTGGCTCACGCCTGTAGTCCCAGCACTTTGGGAGGCCGAGGCGGCGGATCATGAGGTCAGGAGATCGAGACCATCCCGGCTAAAAAAACGGTGAAACCCCGTCTCTACTAAAAATACAAAAAATTAGCCGGGCGTAGTGGCGGGTGCCTGTAGTCCCAGCTACTCGGGAGGCTGAGGCAGGAGAATGGCGTGAACCCGGGAGGCGGAGCTTGCAGTGAGCCGAGATCACGCCACTGCACTCCA
13	25097065	25097066	561	GCTACAGTGAGCGGAGATTGCACCACTGCACTCCAGCCTGGGCGACAGAGCAAGACTCTGTCTCAAAAAGACAGTGAAAGACAACTCCATATCTTAGACGATTTTGGCACAAACCTTTCTTATATTTACTATGTCTGAATATTCACGTTTTTATTTGAAAGTTGAATGGGTTCAAGCGTGTCTCTTCTTAGGTCTAAAAACGTGGTTTTACTAACTGTTCTAAGAAAGAATGTGTTTAATTCAGTGAAACAAAAC
13	25456008	25456009	78	TATCTATATATCTATATAGATTATATATCTATATAGATTATATATCTATATAGATGCATCTATATATCTATATAGATGC
13	26816265	26816266	323	TTTTTTTTTTTTTTTTTTTTTTTTTTTTTTTGAGACGGAGTCTCGCTCTGTCGCCCAGGCTGGAGTGCAGTGGCGCGATCTCGGCTCACTGCAAGCTCCTCCTCCCGGGTTCACGCCATTCTCCTGCCTCAGCCTCCCGAGTAGCTGGGACTACAGGCGCCCGCTACCACGCCCGGCTAATTTTTTGTATTTTTAGTAGAGACGGGGTTTCACCGTGTTAGCCAGGATGGTCTCGATCTCCTGACCTCGTGATCC
13	27046951	27046952	2512	TACACATAGATATACATATATATACATGTATGTATGTGTACACATATATGTTCATATATATACATGTATATATGTGTACACATACATACCTGTATATATCTACATATATACATGTATGTATGTGTACATGTATACATGTATGTGTACGTGTATAACATGTATGTATGTGTACATGTATACATGTATGTATGTGTACATGTATACATGCATGTGTGTACATGTATACATGCATGTGTGTACATGTATACATGCATG
13	27546902	27546903	1173	GTGTTGTGTGTGTTGTGTGTTGTGGGTGGTGTGTATGTTGTGCGTGGTGTGAGTGTGGTGTGCATGTGTTGTGTGTGTGGTATGTGATGTGCGTGTGGTTTGTGGTGTGTGTGACATGCATGTGTGGTGTGTGTGTGGTGTGCATGTGTGTTGTGTGCAGTGTATGATGTGTGTGTGGTGCGTGTTGTGTGTGTGTCATGTGTGTTGTGTGTGTGTGTTGTGTATGTGGTATGTGAGGTGCGTGTGGTGCGTGTG
13	28157360	28157361	71	AAAGTTATATAGGAGAGGACGCGCGCGCACACACACACACACAAAGTTATATTGGAGAGGACACGCGCCGCG
13	29158947	29158948	1005	CTCTCCCTCTGCATGGAATCAATAGCCAAGTCCTTCCTAACCTCCGTTCTCTTTGTTCTCTCTCCCTCCCTTCCCTATTTCTTATTAGGCCTTTCTCACCATCCTCACAGGCAACACAGCAATAGCAGCTGTGAGTCTCCTGTCTGCCCAAGAAGGTGGCCCCTCATCAGGAAGCCGGCTCTCCTCTCACACCAGCTGGCAGGGGCCTCTCCAACCCCTGAGCTCCAAGCACACATGGCTTCCACATTCCTGTGA
13	31640704	31640705	1162	ACAAAAATTAAAGAAATAAAAAGAATATGAGCATGTAAATTGGATAATGCTATCCTGGTGCTGGAAGTGCAACACATTAGTTGCAAAGGATGATGCACTTGTCACTTAGCTTGCAGGCAAAGTGCTAGGCTCAGAGGATGCTGGTAATATAGTAGCTTTTGGTTCTAACCCTCACAGAGTTTGGCAACCAGACACCAAAAGAAACAGGAAGAGGAAAAGTAAGTAAATTCGGAGCTAAAGGACAACAGGACTGAG
13	32297217	32297218	327	TAAAAGATACATGAAATGGGCCGGGCGCGGTGGCTCACGCCTGTAATCCCAGCACTTTGGGAGGCCGAGGCGGGCGGATCACGAGGTCAGGAGATCGAGACCATCCTGGCTAACACGGTGAAACCCCGTCTCTACTAAAAATACAAAAATTAGCCGGCGTGGTAGCGGGCGCCTGTAGTCCAGCTACTCGGGAGGCTGAGGCAGGAGAATGGCGTGAACCCCAGGGGGCGGAGCCTGCAGTGAGCCGAGATTGCG
13	32746066	32746067	60	AGATGCAGATGTAGATGTGGATGTGGATTTGGGTGTGGATGTGGATGTAGGTGTGGATGTA
13	33934800	33934801	296	AAGGAATCCTTCTGTCTACACAGAAGGATTCCTTCTGTCTACACAGAAGGATTCCTTCTGTCTACACAGAAGGATTCCTTCTGTCTACACAGAAGGATTCCTTCTGTCTACACAGAAGGATTCCTTCTGTCTACACAGAAGGATTCCTTCTGTCTACACAGAAGGATTCCTTCTGTCTACACAGAAGGAATCCTGTCTACACAGAAGGAATCCTTCTGTCTACACAGAAGGAATCCTTCTGTCTACACAGAAGGA
13	34738967	34738968	292	TTCACCCTCTTTTTTTTTTTTTTTTTTTTTTTTTTTTTTTGAGACGGAGTCTCGCTCTGTCGCCCAGGCCGGACTGCGGACTGCAGTGGCGCAATCTCGGCTCACTGCAAGCTCCGCTTCCCGGGTTCACGCCATTCTCCTGCCTCAGCCTCCCCGAGTAGCTGGGACTACAGGCGCCCGCCACCGCGCCCGGCTAATTTTTTGTATTTTTAGTAGAGACGGGGTTTCACCTTGTTAGCCAGGATGGTCTCGATC
13	36400678	36400679	109	TTCCCTCCCTCCCTCCCTCCCTCCCTCCCTCCCTCCCTCCCTCCCTCCCTCCCTCCCCCTCCCTCCCTCCCTCCCTCCCTCCCTCCTTCCTTCCTTCCTTCCTTCCTTCC
13	36532423	36532424	1207	GGTAGTGGTGGTGATGGTTATAACAGTGGTGGTGGTGGGTGGTGGTTATAGTAGTAATGGTGGTAATGGTTATAGTAGTGGTAGTGGTGGTGATGATGATGGTGGTTATAGTGGTGGTGGTGATGGTTATAACTGGTGGTGGTGGTGGTGGTGGTGGTTATAGTGGTGATGGTGGTGGTGATGATTATAGTGATGGTGGTGGTGGTGGTGATTATAGCAGTGATGGTGGTGATGGTTATAGTAGTGGTAGTAGTG
13	36934417	36934418	59	CAAAAATTTAAGTTTAAAAATTTATTTATTTATTTATTTATTTTTGAGATGGAGTCTCGC
13	37368842	37368843	82	AGTATATAGAAGAACAGTATATAGAAGAAAGTATATAGAAGAACACACCTATTTTTAATGAATATATTTCTTTGGCAGGAAAG
13	37789709	37789710	169	TTTTTTTTTTTTTTTTTGAGACAGAGTCTTACTCTGTCACCCACGCTGGAGTGCAGTGGCGCAATATCGGCACACTGCAACCTCCGCCTCCTGGGTTCAAGCAATTATGTCTCAGCCTCCACAGTAGCTGCGACTACAGGCCACGCCACCATGCCAGACTAATTTTTTTT
13	38226839	38226840	57	CTGCAGGCATGGAGAATGGGACTCAGCATTGTTGAAGAGAATTGTACATATTGTTTCC
13	40651269	40651270	95	AAGGAAGGGAAGGAAGGAAGAGAAGGAAGGAAGAGGGAAAGAAGGAAGGAAGGTAGGAAGCGGGGGAGGAGGAAGGAGGAAGGAAGGAAGGAAGGA
13	42940089	42940090	349	AGAAAACTATTTATTTTTTTTTTTTTTTTTTTTTTTTTTTTTTTTTTTTTTTTTTTTTTTTGAGACGGAGTCTCGCTCTGTCGCCCAGGCCGGACTGCGGACTGCAGTGGCGCAATCTCGGCTCACTGCAAGCTCCGCTTCCCGGGTTCCACGCCATTCTCCTGCCTCAGCCTCCCGAGTAGCTGGACTACAGGCGCCCGCCACCGCGCCCGGCTAATTTTTTGTATTTTTAGTAGAGACGGGGTTTCACCTTGT
13	42947296	42947297	385	CTGTTTATATTTATTGAGTGAATACTAGAATAATCACCTTAATTTGTAAATTCCTTAAGGGGAAGGATTTTGTATCCTTTTTTCCTTAGTGACTATGAAGTTTCTTCTCTAGGTTTGATGAGGTGATCATTAACTTTGATGAAAAGAAACAGGGACCAAAGTGAACCTGTCAGTCATCACATCAGTTGATAAGCAAACTGAAGATGATTTAAAGTGATAAATCCTGAGGTAAATAGGTAGCTGCTTCACATTTTC
13	45528157	45528158	334	TTCTTTTTTTTTTTTTTTTTTTTTTTTTTTTTTTTTTTTTTTTTTGAGACGGAGTCTCGCTCTGTCGCCCAGGCCGGACTGCGGACTGCAGTGGCGCAATCTCGGCTCACTGCAAGCTCCGCTTCCCGGGTTCACGCCATTCTCCTGCCTCAGCCTCCGCAGTAGCTGGGACTACAGGCGCCCGCCACCGCGCCCGGCTAATTTTTTGTATTTTTAGTAGAGACGGGGTTTCACCTTGTTAGCCAGGATGGTCTC
13	46268078	46268079	314	CCGGCCGGGCGCGGTGGCTCACGCCTGTAATCCCAGCACTTTGGGAGGCCGAGGCGGGTGGATCATGAGGTCAGGAGATCGAGACCATCCTGGCTAACAAGGTGAAACCCCGTCTCTACTAAAAATACAAAAAATTAGCCGGGCGCGGTGGCGGGCGCCTGTGGTCCCAGCTACTCGGGAGGCTGAGGCAGGAGAATGGCGTGAACCCGGGAAGCGGAGCTTGCAGTGAGCCGAGATTGCGCCACTGCAGTCCGC
13	46647733	46647734	317	TCAATGTACTATTTCTTTTTTTTTTTTTTTTTTTTTTTTTTTTTTTTTTTTTTGAGACGGAGTCTCGCTCTGTCGCCCAGGCTGGAGTGCTCACTGCAAGCTCCGCCTCCCAGGTTCACGCCATTCTCTCCTGCCTCAGCCTCCCGAGTAGCTGGGACTACAGCGCGCCGCCACCACGCCCGGCTAATTTTTTGTATTTTTAGTAGAGGCGGGGTTTCACCATGTTAGCCAGGATGGTCTCGATCTCCTGACCTC
13	47044310	47044311	327	TTGAGACAGAGTCTTTCTCTGTCACCCAGCCTGGAGGGCAGTGGCGTGATCTCGGCTTACTGCAAGCTCTGCCTCCCAGGTTCAAGTGATTCTCCTGCCTCAGCCTCATGAGTAGCTGGGATTACAGGCACCCGCCACCACGCCCAGCTAATTTTTTGTAATTTTAGTAGAGACGGGGTTTCACCACGTTAAGCAGGATGGTCTCTCGATCTCCTGACCTTGTGATCTGCCTGCCTCGGCCTCCCAAAGTGCTGG
13	47095340	47095341	318	TTTCTTTTTTTTTTTTTTTTTTTTGAGACGGAGTCTCGCTCTGTCGCCCAGGCTGGAGTGCAGTGGCGGGATCTCGGCTCACTGCAAGCTCCGCCTCCCAGGTTCACCCCATTCTCCTGCCTCAGCCTCCCAAGTAGCTGGGACTACAGGCGCCCGCCACTACGCCCGGCTAATTTTTTGTATTTTTAGTAGAGACGGGGTTTCACCGTTTTAGCCAGGATGGTCTCGATCTCCTGACCTCGTGATCCGCCCGCC
13	47293156	47293157	70	ATTTATGTACTTGTTGTGAGAACATCTTAATAGGCACTCAGCAGATATTTAAGGATGTGTACAAGAAACCA
13	49486579	49486580	1195	ACAGAACCACGGAAGATGTATGAGAACATGCATGGCACTCCAAAAGGAAATGAAATTGGGCGCAGATGTAATTCCTGTCCAATTTGAGTGATGAATGTAGTCCCACCTCCCATGTTAAAGAATACTAATCTATTGAGGTTGGAAAGCACAGAAGCCTTAGTACTGGGGAATAGGAACAAAAATGGCATGATATTTAGGGTGATCGTCAATGCATGTGCAGGTGTAATGTCACTTGCAAAGACTCAGGCCAATGTA
13	50042753	50042754	322	AACGGGCCGGGCGCGGTGGCTCACGCCTGTAATCCAGCACTTTGGGAGGCCGAGCGGGTGGATCATGAGGTCAGGAGATCGAGACCATCCTGGCTAACAAGGTGAAACCCCGTCTCTACAAAAATACAAAAAATTAGCCGGGCGCGGTGGCGGGCGCCTGTAGTCCCAGCTACTCGGAGGCTGAGGCAGGAGAATGGCGTGAACCCGGGAAGCGGAGCTTGCAGTGAGCCGAGATTGCGCCACTGCAGTCCGCAG
13	51922920	51922921	163	CATCCTAAGAGTATACAACTGTCATTTTCCCAAAACCAAAGAGATAAGATGACTTATGTAATTGAGTCCCCCCATGACCCCCTGATCCAGCCCTAGGCTGGACCAGTTTTTGGAAAGGAAATGCTCGTGGTTCCCTTGTAGGAACGTTGCCCAAATCTTATCCC
13	52576744	52576745	141	TCCCTCCCTCCTCCCTCCCTCCTTCCTTCCTTTCCTTCCCCCTCCCCTACCTTCTGTTATCCCCTCCCCTCCCTCCTGTCCCTTCCCCCCCTTCCCTCCCTTCTCCTCCCCTCCCCGCTCCTCCCCTCCCTCCCCCCCTTTC
13	53034839	53034840	662	CGGCTCTCCAAAGTGCTGGGATTACAGGCGTGAGCCACCGCGCCCGGCCTGTTTACACTGTTAAAAATAATTAAAAGTTTTGCTTAGGGCTGGGCGTGATGGCTCACACTTGTAATCACAGCACTTTGGGAGGCCAGTGTAGGCAGATCACCTCAGGTCAGGAGTTCAAGACCAGCCTGGCCAACATGGTGAAATCCTGTCTCTATTAAAAATACAAAAATTAGCTGGGTGAGGTGGCGTGTGCCTGTAATCCCA
13	53467399	53467400	197	TGAGGTGGGATATTATTCTCTCACTTTTACAAATAAGAAAACTAAAGCAGAGATTTGAGTACTTTGCCCACAACCTCACAGCTATTAAGCAGATCTGGAATTTTACCCAGGTCTTTCTCTCCACTGGGGCATAGCCAAGTAGCTTTTGCTTGACTAATAGACCTGGCACAACCATAGACAGTAGGGATAGAAGGAGGT
13	54871143	54871144	347	ATTGAATGAATATTGAATGAATATTCGATATCGAATATTGAATGAATATTCGATATCGAATATTGAATGAATATTCGATATCGAATATTGAATGAATATTCGATATCGAATATTGAATGAATATTCGATATCGAATATTGAATGAATATTCGATATCGAATATTGAATGAATATTCGATATCGAATATTGAATGAATATTCGATATCGAATATTGAATGAATATTCGATATCGAATATTGAATGAATATTCGATA
13	55511732	55511733	55	AGGTTTGGGGGAGTGTTGGCAGTACCAATAAGATTTTTGGGGCAGTTTGTCCCTAA
13	57019843	57019844	75	GAGACTCCGTCTAAAAAAAAAAAAAAAAAAAAAAAAAGAATAATCAGGTGCCTTAACCATTAGCTGATGAGAAGGT
13	60611169	60611170	131	ACACATTGAAGACCCTATTTTCTCTTCTGGCTTTCATTGCTATTTTTGAGAACTTGGCGTTTAGTAAAACTGATTCCTTTCCAGCTAATCTGCCTTTTCTCTTTGTCTGATTCTATGATTTTTTTTATCTTT
13	61367395	61367396	305	TTTTTTTTTTGAGACAGAGTCTCGCTCTGTTGCCCCAGGCTGGAGTGCAGTGGCGGGATCTCGGCTCACTGCAAGCTCCGCCTCCCGGGTTCACGCCATTCTCCTGCCTCAGCCTCCCAAGTAGCTGGGACTACAGGCGCCCGCCACTACGCCCGGCTAATTTTTTTGTATTTTTAGTAGAGACGGGGTTTCACCGTTTTAGCCGGGATGGTCTCGATCTCCTGACCTCGTGATCCGCCCGCCTCGGCCTCCCAA
13	61462345	61462346	6063	TAAAAAAGAGGAGAGGGGGAGGAGCCAAGATGGCCGAATAGGAACAGCTCCGGTCTACAGCTCCCAGGGTGAGCGACGCAGAAGACGGGTGATTTCTGCATTTCCATCTGAGGTACCGGGTTCATCTCACTAGGGAGCGCCAGACAGTGGGCGCAGGCCAGTGTGTGTGCGCACCGTGCGCGAGCCGAAGCAGGGCGAGGCATTGCCTCACCTGGGAAGCGCAAGGGGTCAGGGAGTTCCCTTTCCGAGTCAAAG
13	61465034	61465035	64	CAATTACCTTCCAGGACACTCCATTCTTCTAGCCACTTGTCCTCATTCTCTTTTGTTGTGGTTCA
13	61552093	61552094	54	CATATATATGTATATATATGCGTGTGTGTACATATATGTATATATGCGTGTGTGT
13	61926449	61926450	103	AGGAAAGAAAGGAAGGAAAGGAAGGAAGGAAAGAAATAGAAAGAAATAAAAAGAAAGAAAGAGGAAAAGAAAGAAGAAAGAAGAAAGAAAGAAGAAGGAAGGAA
13	63776612	63776613	6978	TTATCAGGGTAATACTAAGCTAATAAAATAAGTTGGCATGCATTTTCTCTGTATCTTCGAAAGACGTTGTGAGGAATTTGAATTAATTATTTGTTAAATGTTATTTGTTAAAAATTTGTTAAATGTTAATTCTCAGTGTTTTCTTTAAAGTACCCAAAATAGTGGGAGACAAGAGGGCATCATCAGATGGCGTAGAGGGAGATAGAGGCTTAGCTCTATTAAGTAAAACTTCTCATTCACTTACAGGTTCAAGTG
13	66721142	66721143	1233	GGCTTGGCTTGGGCTCAGAGGCCTGACACTAGCCAAGTGCAGTGTTTTAGGTTTTTTAAAAAGTATTTTATTATTTGCATACCATCACAGTGACATTCTAATAGCTAAACAGCTCAGTTTTTTATATGACAGTTCCTCTCAAAACGGTGAATTTACATGGTTGATGTTGAAATTGATATACACACACAAAAAAGATCTCTATCTTACTGACATATTGCATTCTATCTTTAAGAATTTTGTTTAAACTAAGGTATA
13	67903472	67903473	236	TAAGAATACAGATAGATATCCTGGCTAACACGGTGAAACCCGTCTCTACTAAAAATACAAAAAAATTAGCCGGGCGAGGTGGCGGGCGCCTGTAGTCCAGCTACTCGGGAGGCTGAGGCAGGAGAATGGCGTGAACCCCAGGGGGCGGAGCCTGCAGTGAGCCGAGATTGCGCCACTGCACTCCAGCCTGGGCGACAGCGAGACTCCGTCTCAAAAAAAAAAAAAAAAAAAAAAAAA
13	68823793	68823794	108	TCTAGCTGGGTATGGTGGTATGTGCTTGTAGTACCAGCTACTTAGGAGTCTGAGGCAAGGATAGCTTGACCCTAGGAGTTGGAGGCAGCAATGAGCTTTGATCCTTCCA
13	70945574	70945575	2824	CCATCATTTTTGGGGTAAAAAATTAATTTTAGGGAAAACATTTGTTCACTGAATTATACAGATTATACAAGAGCTTGACACATTTTATTATAAAATATATATTTAAGGATCATAACTGTTAATATCACCATCAGTCTCATCAGGGAAGTTTTTATGTATTGATAAACCACAATGGTGAGTATAAATAAGCTTTCCAAAGTTCTACTAATGGAGAAAGACAGGAAAGTAATACTTTCTGAACATACAGATTAACTA
13	73227393	73227394	213	TACAAGTCTCTATTATAAGAACATGTCTATTATCAAGAGAAGGAAAAAAGATTTACCTGCAAATGAAGCAGACTTTGGGGATTAAAACAATGCAAACTCATGTCACTTCATGGACTCATTACCATCCACACCGTGTCTGTATTCTCCAGTAGTGTATTTTGTTAACAAGATACAAGTGAAATGGGTGTGTATGCAGAAATGTCCCACTAGGCTT
13	73761011	73761012	305	TACACACGTGTATATATGTGTATATATGTGTATATATGTATATATGTGTATATATGTATATATACATGTGTACATATACATGTGTACATATACGTGTGTATACATGTGTACATATACGTGTGTATACATGTGTACATATAAGTGTGTATACATGTGTATATATACGTGTGTATACATGTGTGTATATATACGTGTGTATACATGTGTACATATACGTGTGTATACAGTGTATATATACGTGTGTATACATGTGTA
13	74312249	74312250	53	CATATATGTATGTGTACATATATATATATACACACACATATATGTATGTGTACA
13	76214300	76214301	72	TAGCTGCTGCAGCTAAAATCATTTTAAAGGGTTGCATGTGAAGGAATTGTACTGTGAGTCTTCCAATGATTTT
13	78584672	78584673	317	TAAGATTTGGCCGGGCACGGTGGCTCACGCCTGTAATCCCAGCACTTTGGGAGGCCGAGGCGGGCGGATCACGAGGTCAGGAGATCGAGACCATCCCGGCTAAAACGGTGAAACCCCGTCTCTCTACTAAAAATACAAAAAATTAGCCGGGCGTAGTGGCGGGCGCCTGTAGTCCCAGCTACTTGGGAGGCTGAGGCGGGAGAATGGCGTGAACCCGGGAGGCGGAGCTTGCAGTGAGCCGAGATCCCGCCACTG
13	79233448	79233449	248	TCTTTCTTCTTTCTTTCTTTCTTTCTTTCTTTCTTTCTTTCTTTTCTTTCTTTCTTTCTTTTCTTTCTTTCTTTCTTTCTTTCTTTCTTTCTTTCTTTCTTCTTTCTTTCTTTCTTTCTTTCTTTCTTTCTCTTTCTTTCTTTCTTTCTTTTCTCTTCTTTCTTTCTTTCTTTCTTTCTTCTTTCTTTCTTTCTTTCTTTCTTTCTTTCTTTCTTTCTTTTCTTTCTTCTTCTTTCTTTCTTTCTTTCT
13	79259794	79259795	1885	GTTTTTTTTTTTTTTTTTTTTCTTTTTTTTTTATTATTATTATACTTTAAGTTTTAGGGTACATGTGCACATTGTGCAGGTTAGTTACATATGTATACATGTGCCATGCTGTGTGCGCTGCACCCACTAACGTGTCATCTAGCATTAGGTATATCTCCCAATGCTATCCCTCCCCCATCCCCCGACCCACCACAGTCCCCAGAGTGTGATATTCCCCTTCCTGTGTCCATGTGATCTCATTGTTCAATTCCCACC
13	79271588	79271589	318	TCTTTTTTTTTCTTTTTTTTTTTTTGAGACGGAGTCTCGCTCTGTCGCCCAGGCTGGAGTGCAGTGGCACGATCTCGGCTCACTGCAAGCTCCGCCTCCCGGGTTCACGCCATTCTCCTGCCTCAGCCTCCCAAGTAGCTGGGACTACAGGCGCCCGCCACTACGCCCGGCTAATTTTTTGTATTTTTAGTAGAGACGGGGTTTCACCGTTTTAGCCGGGATGGTCTCGATCTCCTGACCTCGTGATCCGCCCGC
13	81280239	81280240	194	CACCCCTCTTCCCCCCCTGGCTCTTAGACCCCCCCATCGCAGGGGTGGGAGACACCACCCATGAGGCGGGGACTGAGAGCCAGCCCTCTTCCCCCCCGGCTCTTAGGACCCCCATTGCGGGTGGGAGGCACACCCCCGCGAGGCGGGGACTGACAGCCAGCCCCTCTCCCCCCAGGCTCTTGGGACCCCCATCGC
13	82367698	82367699	2543	AGGAGCCATCACACTCGGCCACAAATAACAAGCTTTAAAAGCCACCCCTCTCCCTCTCCCTCTCCCTCTCCCGCTCCCTCTCCCTCTCCCTCTCCCTCTCCACGGTCTCCCTCTCATGCGGAGCCGAAGCTGGACTGTACTGCTGCCATCTCGGCTCACTGCAACCTCCCTGCCTGATTCTCCTGCCTCAGTCTGCCAAATGCCTGCGATTGCAGGCACGCGCCGCCACGCCTGACTGGTTTTGGTGGAGACGGG
13	82547443	82547444	109	GCCTTCAGGGAAGTGGTTACTTCATGAGGATTCTGCCTTCCTGAATGAAACAGTGCTTTATATGAGGACTGGAGGGAACTAACTCAGGTTCTATTTGTTCTTCCACTCTT
13	83178224	83178225	77	CACATATATATGTAAATACATATATATATGCTATATATACACATATATATGTAAATACATATATATGGCTATATATAC
13	83178839	83178840	80	TATATATGTGTATATGCACACGTGTGTTTACATATATGTATATATGTGTATATGCACACGTGTGTTTACATATATGTATAT
13	84862026	84862027	104	ATATCTCACACACATATATATCATATATATGTGTGTGAGATATATATATATATCTCACACACATATATATCATATATATGTGTGTGAGATATATATATATATATC
13	84919613	84919614	3770	GAATGTATTTCCAGTTCCCTAGGGAATTTTTACAACTCAAAGACCTAAGTATTATCAAAGCTTTTGAGATGGAAGCCCGGAACTGGTGTATATTAATGACTGTGCTTTTGAACTGCTTTTGCAATAAAATATGCAAAGGCCAAGATAAACTTTCAGAGCCAGCATAGTCCTGATTATCTTTAAAAGAATACCAGAGTTACTCACTACAAGGAGAATATACATAAAAAGATTTTAATTGTCAATTATTGAAAATTG
13	85469835	85469836	122	TGCAGTGAGCCGAGATCGGGCCACTGCACTCCAGCCTGGGCGACAGAGCGAGACTCTATTTCAAAAATAGAGTCTAATTTTTTTTTTTGAAATAGAGTCTCGCTCTGTCGCCCAGGCTGGAGT
13	85820942	85820943	538	ATTCTCCCATTCCTCATAAGTATAAAGGCAACCTTTATCTTCTCCATAATCAGAATTATTTCAGCCAGCAGAATAAATGCACTTCATACCCATTTCAACTTGTCCATCCATATAACTCTTCCTTAGGCTTATTTTATCAGCTCTCCCAGCATTTTTCTTTACTGGCTTCTAATAAAACAGGCAAAGCTATTTGTCAGTGCCTAATAGTTAGTATATATATCTCTCTCCTTCCAGATATTCCTCTCCTCATATTAA
13	86166447	86166448	173	CAAATAGTGGCGGGCGCCTGTAGTCCCAGCTACTTGGGAGGCTGAGGCAGGAGAATGGCGTGAACCCGGGAGGCGGAGCTTGCAGTGAGCCGAGATCCCGCCACTGCACTCCAGCCTGGGCGACAGAGCGAGACTCCGTCTCAAAAAAAAAAAAAAAAAAAAAAAAAAAAAAAA
13	86325875	86325876	60	AGATAGATCTAGATCTATCTATAGATAGATCTAGATCTATCTATAGATATATCTATAGATC
13	86340150	86340151	666	TTTTTTTTTTTTAATTTTTTTTATTATACTCTAAGTTTTAGGGTACATGTGCACATTGTGCAGGTTAGTTACATATGTATACATGTGCCATGCTGGTGCGCTGCACCCACTAATGTGTCATCTAGCATTAGGTATATCTCCCAATGCTATCCCTCCCCCCTCCCCCGACTCCACCACAGTCCCCAGAGTGTGATATTCCCCTTCCTGTGTCCATGTGATCTCATTGTTCAATTCCCACCTATGAGTGAGAATATG
13	86361577	86361578	111	TCATTGTTGTCTTTTTTGTTTGTTTGTTTGTTTTTTGTTTTTTGAGACGGAGTCTCACTCTTTCGCCCAAGCTGGACTGCAGTGGCGCTATCCCGGCTCACTGCAAGCTCCG
13	86689279	86689280	444	CTGTGTGTGTATATATGTATATATATACATATATGTGTGTGTATATATATGTATATATATACATATATGTGTGTGTATATATGTATATATACATATATGTGTGTGTATATATGTATATATACATATGTGTGTGTATATATGTATATATACATATATGTGTGTGTGTATATATGTATATATACATATATGTGTGTGTATATGTATATATACATATATGTGTGTGTATATGTATATATACATATATGTGTGTGTATA
13	87722497	87722498	60	CTTCTTCTTCTTCTTCTTGTTCTCCTTCTCCTTCTCTTTCTCCTTCTCCTTCTCCTTCTCT
13	87727293	87727294	69	GTATATTATTAGTACATAGTATATATTAATATATACTATGTACTAATATCTACTATATATTAATATATAC
13	87863044	87863045	147	GGGAGGAAGGAAGGAAGGAATGAAGGAAGGAAGAAGAGGGAGGGAGGGAGGAAGGAAGGAAGGAAGAAGAGAGGGAGGGAGGGAGGAAGGAAGAAGAGAGAGAAGGATGAAGGAAGGAAGGGAGGGAGGGAAGGGAGGGAGGGAGGAA
13	89227029	89227030	79	TTTTTTCTATACACAAATACATTAAGTATTTGTACTTAATGTATTTAAATACATAAGTATACTTATTGTATACACAAATA
13	89254832	89254833	83	TTTTTTAATGTCTTAATAATATAAAATTGGTATTCTAACTTTTAGCTAATGTAGTATATATAAAAAATTAAGATTTTACAAGTT
13	89791409	89791410	120	ACACACACACACACACACATATATACGTATTTACAGGCATATACCATATTTCTTATGTACTTCAGAGCATAGGTGCTATTAGAAATCAGAACTGTCAATGGAAATATAACACATATGACTT
13	90321201	90321202	4163	TTGTAATTACAGGAGCTCTCTTTAAGAAATAATCCAAAATTTGTTATGAAAGTAAACATTTATTTGGATAGAGGAAAAAAAATCACTACCAATTATAAATTTAAATAAGCTGGAAATGATACTGATCAGTTCATTCAGGTTTGTTTTGCCCACGCCCACAGTAAGTCAATCACTGTGACAACACATTTTGCAAAAGAGAAAAGATTTATTCACTAGGGAGCCTAGCGAGGAGGCAGGAAAAGAGCTCTCAAATTT
13	90550561	90550562	321	TAACAGGAGACAGATGGCCGGGCACGGTGGCTCACGCCTGTAATCCCAGCACTTTGGGAGGCCGAGGCGGGCGGATCACGAGGTCAGGAGATCGAGACCATCCTGGCTAACACGCGTGAAACCCGTCTCTACTAAAAATACAAAAAATTAGCCGGGCGAGGTGGCGGGCGCCTGTAGTCCCAGCTACTCGGAGGCTGAGGCAGGAGAATGGCGTGAACCCCAGGGGCGGAGTCTGCAGTGAGCCGAGATTGCGCC
13	90943361	90943362	58	CCAAGTCTTTTCTTGGGGCTGTCCTAATGCTAAGGAGTGCTATTGGGAGACATTTGGCT
13	90947652	90947653	323	TGAAACTGCAGGCCGGGCGCGGTGGCTCACGCCTGTAATCCCAGCACTTTGGGAGGCCGAGGCGGGTGGATCATGAGGTCAGGAGATCGAGACCATCCTGGCTAACAAGGTGAAACCCCGTCTCTACTAAAAATACAAAAAAAATTAGTCGGCGCGGTGGCGGGCGCCTGTAGTCCCAGCTACTCGGGAGGCTGAGGCAGGAGAATGGCGTGAACCCGGGAAGCGGAGCTTGCAGTGAGCCGAGATTGCGCCACT
13	91149425	91149426	72	TAAGATTATGAAAGCACATGTACCCTAAAACTTAGAGTATAATAACAAAAAAAAAACATAAAAAAAAAAAAAA
13	92224026	92224027	58	TATATATACACACATATACGTGTGTGTATGTATACACACACATATACGTGTGTGTATGT
13	92261277	92261278	323	AATTCTTTTTTTTTTTTTTTTTTTTTTTTTTTTGAGACGGAGTTTCGCTCTGTCGCCCAGGCTGGAGTGCAGTGGCGCGATCTCGACTCACTGCAAGCTCCGCCTCCCGGGTTCACGCCATTCTCCTGCCTCAGCCTCCCGTGTAGCTGGGACTACAGGCGCGCGCCACCATGCCCGGCTAATTTTTGTATTTTTAGTAGAGACGGGGTTTCACCGTGTTAGCCAGGATGGTCTCGATCTCCTGACCTCGTGATC
13	92892151	92892152	57	GAAAATGCTTATCTTAGGTGATCTATTAAATATAATATAGCTAAAATGGTGATAATGT
13	93191047	93191048	200	TATGTATATTATAAAGTATATACCCAAAGGATTATAAATCACTCTACTATAAAGACATATACACATTTATGTTTATATTGCAGCACTATTCACAATAGCAAAGACTTGGAACCAACCAAAATGCCCATCAGTGATAGGCTGGATAAAGAAAATGTGGGCACATATAACACCATGGAATACTATGCAGCCACGAAAAAGAAT
13	93375607	93375608	56	GCTATGATTAATTTATTGATTTTTCTATTAGGAAAAAGAAATCAGGAACTGCATTTT
13	93828425	93828426	319	TTATCAAAAACCTTTTCTGCGTGGCTCACGCCTGTAATCCCAGCACTTTGGGAGGCCGAGGCGGGCGGATCACGAGGTCAGGAGATCGAGACCATCCCGGCTAAAAATGGTGAAACCCCGTCTCTACTAAAAATACAAAAAAATTAGCCGGCGTAGTGGCGGGCGCCTGTAGTCCCAGCTACTTGGGAGCTGAGGCAGGAGAATGGCGTGAACCCGGAGGCGGAGCTTGCAGTGAGCCGAGATCCCGCCACTGCA
13	94284868	94284869	65	TATACACACACAATATATATACACACATATACATATATATATACATATATATATACACACATATAC
13	94417479	94417480	59	CTGGAAAGTTGTCTTTCCAGACAGCTTATCTGGAAAGTTGTCTTTCCAGACAATTTATCT
13	95249515	95249516	145	TAAGACATCAGCTACTTGGGAGGCTGAGGCAGGAGAATGGCGTGAACCCGGGAGGCGGAGCTTGCAGTGAGCCGAGATCCCGCCACTGCACTCCAGCCTGGGCGACAGAGCGAGACTCCGTCTCAAAAAAAAAAAAAAAAAAAAAA
13	95677703	95677704	929	GGGTGTGTGGGGGGGGTTGGGGTGTGTATGGGTGTGTGGTGGGGGTGTGTGTGAGGGAGGGTGTGTGTGGGGGTGTGGGGGTGGTGTGTGTATGGGTGTGTGTGTGTGTGGGTGTGTGTGTATGGTGTGTGGTGGGGATGGGTGTGTGGGGGAGGGTGTGAGGGGGTACGGGTGTGTGTGTATGGGTGTGGTGGGGGTGTGGGGGTGTGTGTATGGGTGTGTGGGGGAGGGTGTGTGAGGGGGTGCAGGGGTGTG
13	97981906	97981907	292	ACATACAACATGCACACACACACCCATACACATACACAACACACATACCATATACATAACACACACATACACATATAGCACACACACAACACAAACACACACAACAGAAAATACACAGCACACACACAACACAAACACACAACAGTCAATACACACACACACAATATACACACACAATACACATACAACATACACACCTACCCCATGCAGGCTTACAACACACATACCATATACATAACACACACATACACATAC
13	97991361	97991362	1894	AACACAACACATACTCATACACACACTCGTACACATTCACAACACACTCCCATACACTCACAACACGTACACTACACTCACACACACAACACACTCATATACACAACACATACTCATATACATTCACAACACACTCTCCATACACTCCACACACGACACACTCTATATACACAACACATACACACAACACACTCATACACAACACACACAACACGCTTTCATACATACACATACACTCACAACACACATACACAA
13	98734896	98734897	316	TCGGCCGGGCGCGGTGGCTCACGCCTGTAATCCAGCACTTTGGGAGGCCGAGGCGGGTGGATCACGAGGTCAGGAGATCGAGACCATCCCGGCTAAAACGGTGAAACCCCGTCTCTACTAAAAATACAAAAAATTAGCCGGGCGTAGTGGCGGGCGCCTGTAGTCCCAGCTACTTGGAGGCTGAGGCAGGAGAATGGCGTGAACCCGGGAGGCGGAGCTTGCAGTGAGCCGAGATTGCGCCACTGCACTCCAGCC
13	98851181	98851182	174	GGGGGAGGGGAAAGGGTGGAGGGGGAGGGGGAAGGGATGGAGGGGAGGGAGCAGCGGAGCGGGGAGGGGCAGAAGGGGAAGCGGGGAGGGGCAGAGGGGAAGGGGGAGGGGCAGAGAGGGGAAGCGGGGAGGGGCAGGGGGGCGGGGGGCGGGGAGGGGCAGAGTGGGAGCGGGA
13	99096100	99096101	59	AGGAGGAGGAAGGGACGGGGTGCAGACAGGACCAGGAGGAGGGAACGGACAGTGGGGCAG
13	99125530	99125531	776	CCTCCCCCCCTCCCTCCTTCCTTTCCTCCCTCCTTCCTTTCCTCCCTCCCTCCTTTCCTCCTCCCTCCCTCCTTCCTTTCCTCCCTCCCTCCCTCCTTCCTTTCCTCCCTCCCTCCCTCCTTCCTTTCCTCCCCCCTCCCTCCTTCCTTTCCTCCCTCCCTCCCTCCTTCCTTTCCTCCCTCCCTCCTTCCTTTCCTCCCTCCCTCCTTCCTTTCCTCCCTCCCTCCCTCCTTCCTTTCCTCCCTCCTTCCTTTC
14	100389977	100389978	156	GTTGAATTATCAATGACACTTTTGTCAAAAATCAATCGATCAGAAATGTAAAGGTTTATTTCCGGATACTCAGTTCTGCGTTGAATTATCAATGACACTTTTGTCAAAAATCAATCGATCAGAAATGTAAAGGTTTATTTCGGATACTCAGTTCTGC
14	100419352	100419353	619	GTGGTGATGGTGGTGATGGTGGTGGTGATGGTGGTGGTGATGGTGATGGTGGTGATGGGTGGTGATGGTGGTGGTGGTGGTGGTGATGGTGGGTGATGGTCGTGGTGGTGATGGTGGATGATGGTGGTGAGGTGGTGGTGGTGGTGGTGGTGATGGTGGTGATGGTGATGGTGGTGGTGTATGGTGGTGATGGTGGGTGGTGATGGTGGTGATGGTGGTGATGGTGGTGGTGATGTGGTGATGGTGGTGATGGTG
14	100993276	100993277	1320	GTGGTGAAGATGAGAGTGGTATGGTGACAGTGACGATGATGGTGGTGCTGGAGATAAAGAGGACAGTGGTGATGGTGGTGGCAGTGATGACGATGATGGTAATGGTGGTGAGTAATACAGATGGTGATGCTGATGCTGATGGTGGTAGTGCTAGTGATAATAGTGGTGGCAGTGATGGTGGTGGCGCGGTGGTGACGATGATGGTGATGAGTACAAAGATGGTGATGGTGATGCTGATGGCAGTGGTGCTGGTGA
14	101339793	101339794	1566	GAGCTGATGTGATACATGGGTGGAGGAGGACGTTGGTATGACACATGTGTCGGGGAGAGTGTTGGTGTGACCCATGGGTGGAGGAGGGGGTTGGTGTGACACATGGCTGGAGGGGGTTGGTGTGACACACGGGTTGAGGAGGGGGTTGGTGTGACACACGGGTTGAGGAGGGGGTTGGTGTGACACACGGGTGGGGAGGGGGTTGGTGTGACATGGGTTGAGGAGGGGGTTGGTGTGACACACGGGTTGAGGAGG
14	102316011	102316012	159	ATATTAAAAAAACAAACTCCTGGTGGGTTATAGACTTAAATCTGAAAGGCAAAACTCTAATGCTTTTAAAAAATAATATAGAAGAATGTCTTACATAGGGAAAGAAGTAGAGAAGGACTTCCTTAGACACAAAGCCAGTAATCGTTAAAAGACTGGTTGA
14	104362937	104362938	968	AGATCCATCTCCACATGACAGGAAGGAAGGTGGGATCCATCTCCACATGATGGGAAGGAAGGCAGGATCCATCTCCACATGACAGGAAGGAAGGCGGGATTGGTCTCCACATGACAGGAAGGAAGGCGGATCGGTCTCCACATGACGGGAAGGAAGGTGGGATCCATCTCCACATGACGGGAAGGAAGGCGGGATTGGTCTCCACATGACAGGAAGGAAGGCAGGATCCATCTCCACATGACGGGAAGGAAGGCA
14	104564465	104564466	52	CGTTAGAGATGCGTATGGAGGTTATACCTTAGAGATACGTATGGAGGTTCTAC
14	104698232	104698233	640	TTACCATCATCACTATTACACACCATCATCAACATCATCCCCACTGTCATCATCACCATCACCACCATCATCATCACCATCACCATCACCATCAACATCATCATCACCATCACCACCATCACCATCAACATCAACATCACATCACCACACATCACCATCAACATCAACATCACCATCATCACCATCACCATCACCACCATCACCACCATCACCACCATCACCACCATCATCACCACCATCACCACCATCACCACC
14	104910601	104910602	1624	GGGCGAGTGGGTGAGTGAGTGGGTGAGTGAGTGGTGAATGAGTGAGTGGGTGAATGGGTGAGTGGGTGAATGGGTGAATGAGTGAGTGGATGAATGAGTGAGTGGGTGAGTGAGGGAATGGTGAGTGAGGGAATGGGTGAGTGGGTGAATGAGTGAGTGAGTGGTGAATGGGTGAGTGATTGGGTGAATGAGTGGGTTAGTGAGTGGGTGAATGGGTGAGTTGGTGAATGGGTGAATGAGTGAGTGGGCGTGTGA
14	105119883	105119884	74	CTCGCCGGCCTGGATACACCAGGTTCGCCCAGCCGCCTCGCCAGGCCTGGATACACCAGGTTCCCCCAGCCGCCT
14	105272976	105272977	3336	TCACCTCCACTTTTACCTCCACCAGCATCACCACCATCACCTCCACTTTTACCTCCACCTCCACTACCACCATCACCACCTCCTCCACCTCCACCATTGCCTCCACCTCCATCATCACCTCCACCTCCAGCACCATCACCTCCACCTCTACCACCATTACCTCCACCATCACCTCCACCTCTACCATCACTTCCAACCACCATCACGTCCACCCTCCACTACCTACATCGCTACCTCCTCCACCTCCACCGTTGC
14	105562400	105562401	381	GGCCCTTCTCAAGGGTGTGAGATCAATTTGGCCGAGAAGGGCGCCCTGAACGTCAGGCTGCTTGTCAGGAAGCGCTGCCAGGCCCAGTGAGATGCGGAGATTCGGTTGCGAACACCCGGCCTGAGCCTCGGAGCAGCACTCCAGGGTGAGCGAGGGCTGTCCCGGGGAGGAGACAAATTACACCTTTTCCCCAGTTCCCTCACAACAGGACCATGCCTAGTCCTTGAGGAATCGGGGGAGGGATGTAATTTGTCC
14	106035433	106035434	76	TGTGACTGTGTGGTATATAGTTTGTGAGTGTGAGTGTGTGGTGTATGGGTTGTGCGTGTTTGGTATATGGTGTGTGA
14	106036093	106036094	114	TTGTGTGTGAGTGTGGTATATAGTTTGTGTGAGTGTGTGGCATAAAGTTTGTGAGAGTGTGGTATATGGGTTGTGTGTGGTATATGGCTGTGAGAGTGTATATAGGTGTATGGTC
14	106049335	106049336	1776	GACCAATGGCTGGGCCCTGGTCCTGATCACTGGCCCCTGTTCCTGATCACTGAGCCCTGGACCCAATCGCTGGGCCCTGGTCCTGATCACTGAGCCCTGGACCCAATCGCTGGGCCCTGGTCCTGATCACTGAGCCCTGGTCCTGATTACTGAGCCCTGGTCCTGATCGCTGGGCCCTGTTCCTGATCACTGAGCCCTGGACCCAATCACTGGGCCCTGGTCCTGATCACTGAGCCCTGTTCCTGATCACTAACC
14	106112814	106112815	139	CTTGCCCTGAGCTCTAGTGCCTGTGCCCCTGCAGCTGCGCCTTGCACCAGCCCTGCTCCCCCACCGGCCTGCCTTGCACCTGCGGTCTAGTGCCTGTCCCCTGCTCGTCCTGGCTCCACGGCCGTGCTCACCTGCTGCTC
14	106319877	106319878	229	CACATGGATATGTGCACACATGGACACATACATGTGCAGGACATGCACACACACACAGACACACTAGCACAGAGGCATACACACACAGACACACACATTCACAAACACACATGTGCATGCAAACACACACACATGTACAGACACAAGTACATGGACACATGCACACCCAGAGACACACTGACACAGACACACAGGAGCATGTGATACACTAACACGTGGACACACACGTC
14	106483471	106483472	9563	GGGACAGGCAGGTCCCATCACTGACGCTGGTCCTCAGAAACCCTGACCAGCTACTGACCTTCCAGGTCCCCTGTTCCTGATCAGTGCCTGTGTCTGCTCCTGAGAAGATCCCCATCAACAGTCCCCAGGGTTCTGCCCCCTTCCTTGATGATGTGCCTCTGGGAGTGGGCTGGCTGGGCTGTGGGTCTGCTGTGACTTTCCCCACAGGTCAGCGGCTCAGTGCAGGCTGCACCGACTCGGTGGGGCTGGGCTGTG
14	106483680	106483681	9565	CCAGTGTGGGGACACATGAGCCCTCCCATGCCCAGGATGGAGCTGTTTCAATCACAGCAGGATGGGAATGTGTCTTCTCTATGGGGGCTTTCGGAGCACAGCTCTCCTGTTCCTGAGATTTGAGATTTATAAAGACAAGTCCCACAGAGTGGACTTGCACAAATAAGACAGTACAGGATCCCCAGGAGAGACATCCCATATGAGAAGGGACAGGCAGGTCCCATCACTGACGCTGGTCCTCAGAAACCCTGACCA
14	106484061	106484062	9552	GGGCAGGTGAGTGTCTTTCATCCCTACAGGGACACGAGGCTTCGACCTGCCCTCCTCACCAGGAAGGAAAACTGGCTTTGTTCATCCCGGTTTCCCCAGCTGTCTGGTCATCCTCTCTTCCTGACCTCCTGCCCAGGGCCCTCAGGCTGTGATGCAATGACAAAGTACCTGGAGGTACAAAGGACCTGGAGGTTCCAGGAGGAAATAAAAACGAGTTTGGGGTCTATGAGCCTCTCTCACCCTCACACTAGTTCA
14	106484230	106484231	9560	TGGAGGTACCAAAGGACCTGGAGGTTCCAGGAGGAAATAAAAACGAGTTTGGGGTCTATGAGCTCTCTCACCCTCACACTAGTTCAGACATGCCCTTTCTGTTTATTTAGTTCAGATTTACATATAACAAACCACACAGCCAGGCTCGTCTAAATTGCCACATGCTTGTTTAAACACATTGGAGCAGCATTAATCCTCACATTGATCTCAGAGAATCTTGGTTCCAGTTCACTGTTTACATTAGCTGAGAGAGCA
14	106756950	106756951	334	GAAAAGAAATGAAAAATTCGGGCCGGGCGCGGTGGCTCACGCCTGTAATCCCAGCACTTTGGGAGGCCGAGGCGGGCGGATCACGAGGTCAGGAGATCGAGACCATCCTGGCTAACACGGTGAAACCCCGTCTCTACTAAAAATACAAAAAATTAGCCGGGCGTGGTAGCGGGCGCCTGTAGTCCCAGCTACTCGGGAGGCTGAGGCAGGAGAATGGCGTGAACCCGGGAGGCGGAGCTTGCAGTGAGCCGAGAT
14	106788855	106788856	331	TGGAAGAGGCCGGGCGCGGTGGCTCACGCCTGTAATCCCAGCACTTTGGGAGGCCGAGGCGGGCGGATCACGAGGTCAGGAGATCGAGACCATCCCGGCTAAAACGGTGAAACCCCGTCTCTTACTAAAAATACAAAAAATTAGCCGGGCGTAGTGGCGGGCGCCTGTAGTCCCAGCTACTTGGGAGGCTGAGGCAGGAGAATGGCGTGAACCCGGGAGGCGGAGCTTGCAGTGAGCCGAGATCCCGCCACTGCA
14	106813582	106813583	331	AGAGGCCGGGCGCGGTGGCTCACGCCTGTAATCCCAGCACTTTGGGAGGCCGAGGCGGGCGGATCACGAGGTCAGGAGATCGAGACCATCCCGGCTAAAACGGTGAAACCCCGTCTCTTACTAAAAATACAAAAAATTAGCCGGGCGTAGTGGCGGGCGCCTGTAGTCCCAGCTACTTGGGAGGCTGAGGCAGGAGAATGGCGTGAACCCGGGAGGCGGAGCTTGCAGTGAGCCGAGATCCCGCCACTGCACTCC
14	107161741	107161742	3022	CTTTATAAATATTCTATCACATCTGAGCTGCTCCACAATTCAAGCGATGAGAACTGTCTTTATAAATATTCTATCACATCTGAGCTGCTCCCACAATTCAAGGCGATGAGAACTATCTTTTTAAATATTCTATCACATCTGAGCTGCTCCCAACAATTCAAGGCGATGAGAACTATCTTTTTAAATATTCTATCACATCTGAGCTGCTCCCACAATTCAAGAGCCATGAGAACTATCTTTTTAAATATTCTATCA
14	19012786	19012787	1035	ACTTCTTTGTGATGTGTGCATTCAACTCACAGAGTTGAACCGTCCTTTCCATAGGGCAGTTTTGAAAACAGTCTTTTTGTAGAATCTGCAAGTGGACATTTGAGCACTTTGAGGCCTTCGTTGGAAAGGGGAATATCTTCATATAATAACTAGACAGAAGCATTCTCAGAAACTTCTTTATGATGTGTGCGCATTAGCTCACAGAGTTGAACCCTGCTTTTGAGAGAGCAGTTTGAGCACTGTCTTTGTAGCCTC
14	19165180	19165181	6085	AATAATATTCAGGCGGAGGAGCCAAGATGACCGAATAGGAACAGCTCCGGTCTACAGCTCCCAGCATCAGCGACGCAGAAGTCAGGTGATTTCTGCATTTCCATCTGAGTACCAGGTTCATCTCACTAGGGAGTGCCAGACAGTGGGCGCAGGTCAGTGGGTGTGCTCACCGTACGCGAGCTGAAGCAGGGCGAGGCATTGCCTCACTTGGGAAGCCCAAGGGGTAAGGGAGTTCCCTTTCCGAGTCAAAGAAAG
14	19421275	19421276	69	AAAAGAGAAAAGAAAGAAAGAAGAAAGAAAGAAAAAGAAAGAGAAAAAGAAAAGATAAAAAGAAAGAAAA
14	19729925	19729926	4051	CTTAAAGTTTAAAAAACAGAAAGAATATTATAAATTACATTAAATAATTAGTTTTGCTAAATTAGTTTACTCACTACTGTACCTACTTCCTCACTGCAATTAAAGCAAAAATATAAACTAAAATTAAATAATTTTAGGCCCATGAAGTATATTATCTTAGATTCCTTCTAAATCTTTTAACTCTTCTTTCCAAGTTACCAGTAAATATTAACAAGTTCTTTATTATGTTTACTATGTAATATATATATTTCAAAT
14	19762541	19762542	752	GTATATGTGTATATATACATATACATATATATGTATAAGAATATATGTATATATGTATATATGTGTATATATACATACACATATATGTATACATACATATACACATATATGTATACATATATGTGTATATGTGTATATATACGTATACATATATATACATATACATATATGTGTATATGTGTATATATACGTATACATATATACATATACATATATGTGTATATGTGTATATATACATATATACATATACATATA
14	20252542	20252543	128	TATATATATACATACATATATATATGTGTGTATATATATATATACATATATATGTGTGTATATATATACATATATATGTGTATATATATATATACATATATGTGTGTATATATACATATATGTGTGTGT
14	20484299	20484300	374	TCAGGCCGGGCGCGGTGGCTCACGCCTGTAATCCCAGCACTTTGGGAGGCCGAGGCGGGTGGATCACGAGGTCAGGAGATCGAGACCATCCTGGCTAACAAGGTGAAACCCGCCGTCTCTACTAAAAATACAAAAAATTAGCCGGGCGCGGTGGCAGGCGCCTGTAGTCCCAGCTACTCGGGAGGCTGAGGCAGGAGAATGGCGGGAACCCGGGAAGCAGAGCTTGCAGTGAGCCGAGATTGCGCCACTGCAGTC
14	21263934	21263935	152	ACATGTGTATATATACACGTGCGTATATATACGTGTATATATACACATGCGTATATATACGTGTATATATACACATGCGTATATATACGTATATATATACATGTGTATATATACACGTATATATACACGTATATACACACACACACATATATA
14	23414164	23414165	2553	CAAAAATTAAAAAAAAATATATTTTTGTAAAGACGGGTTCTCCCTATGCTTCCGGGCTGGTCTCAAACTCCTGGACTTAAGCAATCCTCCCTCCTCGACCTTCTGAAGTGCTGGGATCACAGGCATGAGCCACTGTACCAAGGCCCCAAATTCTATTCTTGATTCACTTCTGGTTTGCAACTATATGTATTTGCACTTCTTGTTACTTTATGTTCTTAGACTGTTTTGTGGGTCTACTACTGTGTATAGGTTATA
14	24169469	24169470	64	GGTGAGTCCATGGCCCACTTCTTGGAGATAGTGACAAGAGGCAGGGAAATTCTGGGCAGAAGAGG
14	24236403	24236404	65	CCAATTGTATCTACCTTCTGCTCCCCCTCCCTCACCCTCAATATCAAATTGGTTCCAAGAATTGCC
14	24942931	24942932	123	CTAGCTATCTGGTGGGGACTTGGAGAACTTTTATGTCTAGCTAAGGATTGTAAATAAACAAACCAATCAGCAATCTGTGTCTAGCTCGAGGTTTGTAAATGCACCAATCAGCACACTCTCTACC
14	27768450	27768451	56	TATATATATATGTGTGTGTATATATATATATATATATATATATGTGTATATATGTGT
14	29031318	29031319	67	CATGTGAAACACAAATTTTGTTGATTGAAGTGTAGGACTTACAGACAGTTTCTTTGTCCTTCAGTCTT
14	31444301	31444302	307	TTCTTTTTTTTTTTTTTGAGACGGAGTCTCGCTCTGTCGCCCAGGCTGGAGTGCAGTGGCGGGATCTCGGCTCACTGCAAGCTCCGCCTCCCGGGTTCACGCCATTCTCCTGCCTCAGCCTCCCAAGTAGCTGGGACTACAGGCGCCCGCCACTACGCCCGGCTAATTTTTTGTATTTTTAGTAGAGACGGGGTTTCACCGTTTTAGCCGGGATGGTCTCGATCTCCTGACCTCGTGATCCGCCCGCCTCGGCCT
14	32669232	32669233	247	TCCAGGAGATCGAGACCATCCTGGCTAACAAGGTGAAACCCCGTCTCTACTAAAAATACAAAAAATTAGCGCGGCGCGGTGGCGGGCGCCTGTAGTCCCAGCTACTGGGGAGGCTGAGGCAGGAGAATGGCGTGAACCCGGGAAGCGGAGCTTGCAGTGACCGAGATTGCGCCACTGCAGTCCGCAGTCCAGCCTGGGCGACAGAGCGAGACTCCGTCTCAAAAAAAAAAAAAAAAAACTCTGGGACT
14	33312030	33312031	66	AAAAGAGAAAGAAAGAGAGAGAGGGAGGGAGGGAAGATGGAAGGAAGGAAAAAAGGAAGGAAGGAGA
14	34516674	34516675	520	CTTGTGCCGTGCTTCCTGTACAGTCTGCAGAACTGTGAGCCAAATAAATCTCTTTTCATTATAAATTACGCAGTCTCAGGTATTCCTTAACAGCAATGCAAAACAGACTAACACAATTACCCGCCCCCCTCAACCCCGCACACACAAAAAAAATCTTGTTACTCTATCAAGGGCACCTGGGCAGCCCTGGGCATCTTTTACTCCGTATGTGTCAGTGGCTTGTGCTTCCAGGAAGCTTGCTGCTGGGGGACAGCT
14	34847655	34847656	128	TAAAAAAAGCCAAATTACAGGAGAATGGCGTGAACCCGGGAGGCGGAGCTTGCAGTGAGCCGAGATCGCGCCACTGCACTCCAGCCTGGGCGACAGAGCGAGACTCCGTCTCAAAAAAAAAAAAAAAAA
14	35128025	35128026	311	GAAAAAGAAATTTGAAGGCCGGGCACGGTGGCTCACGCCTGTAATCCCAGCACTTTGGGAGGCCGAGGCGGGCGGATCACGAGGTCAGGAGATCGAGACCATCCCGGCTGAAACGGTGAAACCCCGTCTCTACTAAAAAATACAAAAAATTAGCCGGGCGTAGTGGCGGGCGCCTGTAGTCCCAGCTACTTGGGAGGCTGAGGCAGGAGAATGGCGTGAACCCGGGAGGCGGAGCTTGCAGTGAGCCGAGATCCC
14	36463323	36463324	56	TCCTTCCTTCCTTCCTTCCTTCCTTTCTTTCTTTCTTTTCTTTCTTTCTTTCTTTCT
14	36647965	36647966	243	TCGAAGAATGTTAGAATATTGTAATATTCGAAGAATGTTAGAATATTGTAATATTCGAAGAATGTTAGAATATTGTAATATTCGAAGAATGTTAGAATATTGTAATATTCGAAGAATGTTAGAATATTGTAATATTCGAAGAATGTTAGAATATTGTAATATTCGAAGAATGTTAGAATATTGTAATATTCGAAGAATGTTAGAATATTGTAATATTCGAAGAATGTTAGAATATTGTAATATT
14	36674761	36674762	249	GGAAGGGGAATATCACACTCTGGGGACTGTGGTGGGGTCGGGGGAGGGGGGAGGGATAGCATTGGGAGATATACCTAATGCTAGATGACACGTTAGTGGGTGCAGCGCACCAGCATGGCACATGTATACATATGTAACTAACCTGCACAATGTGCACATGTACCCTAAAACTTAGAGTATAATAAAAAAAAAAAAACATTAAAAAAAAATGCAAAAAAGAAAAAAAAAAAAAAAAGAATTTCCTGTTTAA
14	37280165	37280166	72	CCTCTTTTCTCTATCATATGCTGAATTATTTCCCCCACTCTTTTCTCTATCATATGCTGAATTATTTCCCCCA
14	38359623	38359624	342	TAATAATGTATAGAAAGATTCTTGGCCGGGCGCGGTGGCTCACGCTTGTAATCCCAGCACTTTGGGAGGCCGAGGCGGGCGCGATCACGAGGTCAGGAGATCGAGACCATCCTGGCTAACACGGTGAAACCCTGTCTCTACTAAAATACAAAAAAATTAGCCGCGGCGTGATGGCGGGCGCCTGTAGTCCCAGCTACTCGGGAGAGGCTGAGGCAGGAGAATGGCGTGAACCCGGGAGGCGGAGCTTGCAGTGAG
14	40317397	40317398	213	TGGTGCAACCCCATCTCTACTAAAAATACAAAAATTAGCTGGGCATGGTGGCGCACGCCTGTAGTCCCAGCTACTCGGGAGGCTGAGGAAGAAGAATCGCTTGAACCGGGAGGCGGAGGTTACCGTGTGCCAAGACTGCACCCCTGCACTCCAGCCTGGCAACAGCACGAGACTCCATCTCAACAACAACAACAACAACAACAACAACAACAAA
14	40528694	40528695	62	AACTTAACCACTCAGTCAGTACCGAAACAGCTGTTAGTGAGACCTGCCCTGACACATTTATAT
14	40579674	40579675	332	TTTTTTTTTTTTTTTTTTTTTTTTTTTTTTTTTTTTTTTTGAGACGGAGTCTCGCTCTGTCGCCCAGGCTGGAGTGCAGTGGCGGGATCTCGGCTCACTGCAAGCTCCGCCTCCCGGGTTCACGCCATTCTCCTGCCTCAGCCTCCCAAGTAGCTGGGACTACAGGCGCCCGCCACTACGCCCGGCTAATTTTTTGTATTTTTAGTAGAGACGGGGTTTTCACCGTTTTAGCCGGGATGGTCTCGATCTCCTGAC
14	40592429	40592430	132	CGTTTCTTTCTTTCTTTTTTTTTTTTTTTTTTGAGACGGAGTCTCGCTGTCGCCCAGGCTGGAGTGCAGTGGCGCAATCTCGGCTCACTGCAGGCTCCGCCCCTGGGGTTCACGCCATTCTCCTGCCTCAGCC
14	42499609	42499610	166	TTCATAACCATTTTGTCTATTTCACCATCAGTCAATGAAGGAAAAACTGGAGCCTCATAGAGTTGTTAAAAACTTTAGTATCCACTTCCAGCTTACTGTTGAAGTTTGAGATATATATATATATATATATATATATATATATATATATATATATATATATATATATT
14	42510275	42510276	120	GAAAAAAAAAAAAGCATCCAAATCAGAAAAAAAGAAGCAAAATTATCTGTCTTTGTAGATAACATAATCATATTTTTTTCAGCACAGTACTGGAAGTCCTAGCCAGAGCAATTAGACTAGA
14	42511227	42511228	316	AATCTCATGCCTGTAGTCCCAGCACTTTGGAGGCCGAGGCGGGCGGATCACGAGGTCAGGAGATCGAGACCATCCCGGCTAAAACGGTGAAACCCCGTCTCTACTAAAAATACAAAAAATTAGCCGGGCGTAGTGGTGGGCGCCTGTAGTCCCAGCTACTTGGGAGGCTGAGGCAGGAGAATGGCGTTAACCCGGGAGGCGGAGCTTGCAGTGAGCCGAGATCCCGCCACTGCACTCCAGCCTGGGCGACAGAGC
14	43241850	43241851	67	CTGGTAACATTTCTTCTAAAACTATTCCGGATTTATGGCTGAATTCTATTAGAGGTACAAAGAGTAGC
14	44886695	44886696	511	CTTCCTGGTCAGTAAGACCTCAAAAGGTTAAATACTAACAACTTACACACCTTAAATGATTATCAAAAATTACTGGGCAATATTAATTGGCTTCACTCCACCTTGGGCATAACTACTGATAAGTTACAAAACCTGTTTTCTACCCTAAAGGGCAATATAGCCCTACACTGTCCCAGGTATTTAACTCCTGCAGCAAAAAGGGAAATTGAGGAAGTAGAGCAAGCTCTTTCTCGGAGGCAACTAGATTGCATAGAC
14	45014096	45014097	551	GCTCACGCCTGTAATCCCAGCACTTTGGGAGGCCGAGGCGGGCGGATCACGAGGTCAGGAGATCGAGACCATCCCGGCTAAAACGGTGAAACCCCGTCTCTACTAAAAATACAAAAAATTAGCCGGGCGTAGTGGCGGGCGCCTGTAGTCCCAGCTACTTGGGAGGCTGAGGCAGGAGAATGGCGTGAACCCAGGAGGCGGAGCTTGCAGTGAGCCGAGATCCTGCCACTGCACTCCAGCCTGGGCGACAGAGCG
14	46236394	46236395	59	ATATATATACACAAGTGTGTATATATACACATATATACACAAGTGTGTATATATACACAA
14	46236601	46236602	380	CATATATATACTCAAGTGTGTATATATATACATATATACTCAAGTGTGTATATATACGTATATATATACACAAGTGTGTGTATATATACGTATATATATATACACAAGTGTGTGTATATATATACGTATATATATACACAAGTGTGTGTATATATACGTATATATACACAAGTGTGTGTATATATATACGTATATATATACACAAGTGTGTGTATATATACGTATATATATACACAAGTGTGTGTATATATACGT
14	49180000	49180001	70	ACTATTATTTGATAAAATATTATTTTATCAAACTATTATTTGATAAAATATTATTTTATCAAACTATTATT
14	49672275	49672276	318	TTGGCCGGGCGCGGTGGCTCACGCCTGTAATCCCAGCACTTTGGGAGGCCGAGGCGGGCGGATCACGAGGTCAGGAGATCGAGACCATCCCGGCTAAAACGGTGAAACCCCGTCTCTACTAAAAATACAAAAAATTAGCCGGGCGTAGTGGCGGGCGCCTGTAGTCCCAGCTACTTGGGAGGCTGAGGCAGGAGAATGGCGTGAACCCGGGAGGCGGAGCTTGCAGTGAGCCGAGATCCCGCCACTGCACTCCAG
14	49728022	49728023	118	TTGTTCGTGGACTGTAAAAATTAGTTTAGCCACTGTGGAAAGCAGCTTGGAAATTTCTCAAACAACTAAACTCCCAAAACCTCTTTTGATCTTATGGGTAAAAGCAAATGATTATACAC
14	50192079	50192080	329	GTTTTCCTAAAGTACATGCTCAGAACTCCTAATTTTTGCAGTTTATTACATTATTATTTTTATAGTTTTATCACATATTTACTGGTAAAATAACAGACACCTTACAAAAATAGAGTTAAGTGTTACCATAGTCACAAAGCCAATGGATACATGGGTACCTCCCAAAGCGTGGTCCCCAGACCAGTAGCAGCACCACCTGGCAACTTTTCTTCTCATAGTATTGTTTGCAGTGAATCATAATTTTACTTGTTGACA
14	50227851	50227852	7402	GTTCAAGTGATTCTCCTGCTTCAGCCTTTCTGAGTAGCTAGGACTCACAAGTGTGTGCCCACATGGCCTAATTTTGTATTTTTAGTAAGGGATGGGGTTTTGCCATAGTTGGCAGGCTGGTCTCGAACTCCTGACCTCAGGTGATCCACCCACCTGGGCCTCCTATAGTGCTGGGATTACAGGCATGAGCCACCATGCCCTATACCAAAAGAAAGAATTATTAAAAATGAGCAAACGTACAAAATATAAAAATAG
14	51432092	51432093	334	CTTTTTTTTTTTTTTTTTTTTTTTTTTTTTTTTTTTTTGAGACGGAGTCTCGCTCTGTCGCCCAGGCCGGACTGCGGACTGCAGTGGCGCAATCTCGGCTCACTGCAAGCTCCGCTTCCCGGGTTCACGCCATTCTCCTGCCTCAGCCTCCCGAGTAGCTGGACTACAGGCGCCCGCCACGCCGCCCGGCTAATTTTTGTATTTTTAGTAGAGACGGGGTTTCACCTTGTTAGCCAGGATGGTCTCGATCTCCTG
14	52409311	52409312	55	AAAGAAAGAAAGAAAGAAAGAAAGAAAGAAAGAAAGAAAGAAAGAAAGAAAGAAAG
14	53304116	53304117	57	GAAGTGAGGTTACAAAGTTATTTAGTTGTGTGTACCCCCTATGTAAATGAAGAAGATG
14	54805129	54805130	74	AATTACTGAGTATGGTAGGAGAAATACTGAGTATGGTAGGAGAAATACTGAGTATGGTAGGAGAAATACTGAGTA
14	56666906	56666907	171	TTACTGCTACTACACCACCTTGCCCTAACAATAATGAGAGTTCAAATACAGAGTGCTTATTCTGTGTCATACAGGTAATATCTATGGCCACCAGATTCTGTGCTAATAAGCACTTTGCATATTTTTATATTTGTAGTTGTTATTGTAACAGAAGGTATTTCTTCTTTCTTTT
14	57466338	57466339	582	GGGACCTGGACTCCTCACAGGGACTTTTCCACCTAATGTTCTTTTTTATGTCAGCTCCAATTTCCTACTTGGCAAGAATAGATACCATTGTTTTTTCCCTAAACCTACCACTTCTCTCTGAAATATCACACACATAATATTCAGACTCTCTTGTGTGTGCTGTCCAGCACTGCTGAACAGAAAGGAGTTCCAGTAAGAGTGTGGTGTTCTGGCAAGCTGAGATTGGACTTGTAGCAAAAGGGGTAAGGAGAAAAA
14	57744434	57744435	276	TAAAAGTGAAACATTTCAGGCCGAGGCGGGCGGATCACGAGGTCAAGAGATCGAGACCATCCCGGCTAAAACGGTGAAACCCCGTCTCTACTAAAAATACAAAAAAATTAGCCGGGCGTAGTGGCGGGCGCCTGTAGTCCCAGCTACTTGGGAGGCTGAGGCAGGAGAATGGCGTGAACCCGGGAGGCGGAGCTTGCAGTGAGCCGAGATCCCGCCACTGCACTCCAGCCTGGGCGACAGAGCGAGACTCCGTCT
14	59220402	59220403	6148	GATAGAGCCAAGATGGCCGAATAGGAACAGCTCCGGTCTACAGCTCCCAGCGTGAGCGACGCAGAAGACGGTGATTTCTGCATTTCCATCTGAGGTACCGGGTTCATCTCACTAGGGAGTGCCAGACAGTGGGCGCAGGCCAGTGTGTGTGCGCACCGTGCGCGAGCCGAAGCAGGGCGAGGCATTGCCTCACCTGGGAAGCGCAAGGGGTCAGGGAGTTCCCTTTCCGAGTCAAAGAAAGGGGTGACGGACGCA
14	63226293	63226294	339	ATATATATATATATTTTTTTTTTTTTTTTTTTTTTTTTTTTTTTTGAGACGGAGTCTTGCTCTGTCACCCAGCCTGGAGGGCAGTGGCGCGATCTCCGCTCACTGCAAGCTCCGCTTCCTGGGTTCACGCCATTCTCCTGCCTCAGCCTCCCGAGTAGCTGGGACTACAGGCGCCCGCCACCACGCCCGCTAATTTTTTTTTTTGTATTTTTAGTAGAGACGGGGTTTCACCATATTAGCCAGGATGGTCTTGAT
14	64268911	64268912	6685	GCCTCTCGTGTTCAAGTGATTCTCCTGCCTCAGCCTCCAAGTAGCTGGGATTACAGGCGCCACGCCACCACACCTGGCTAATTTGTGAATTCTTAGTAGAGGTGGGGCTTCACCATGTTGGCCAGGATGGTCTCAAACTCCTGACCTCAGGTGATCTGCCTGCCTCTGCTCCCAAAGTGCTGGAATTACAGGTGTGAGCCACTGCACTCAGCTGATAATTCTATTTTAAAATTTAGGTTAACCTTAATTTATTCT
14	65015037	65015038	323	TCGGCCGGCGCGGTGGCTCACGCCTGTAATCCCAGCACTTTGGGAGGCCGAGGCGGGTGGATCATGAGGTCAGGAGATCGAGACCATCCTGGCTAACAAGGTGAAACCCCGTCTCTACTAAAAATACAAAAAATTAGCCAGGCGCGGTGGCGGGCGCCTGTAGTCCCAGCTACTCGGGAGGCTGAGGCAGGAGAATGGCGTGAACCCGGGAAGCGGAGCTTGCAGTGAGCCGAGATTGCGCCACTGCAGTCCGCA
14	65289121	65289122	162	CTGTGTGTGTGTGTGTGTGTGTGTGTGTGTGTGTGTGTGTTGTGAATCCCAAGAACCAGACCTCAGCCAGCAGAGGGAGGAGAAGCCATTTCTACTAGAGATTTAAGATATTCTCCACCCCCACCCTCTCTCTCTCTTGCTCTGTGTGTGTGTTGTGTGTGTG
14	66258296	66258297	2062	TGTGTGGTCTGTGCGTATTGCATGTAGGTGCGGTGTAAGCTGTGGGATTGTGGTGTGTGTGTGTGGTGATGTGTGCATTTTATGCATAGGCTGTGTGTGTGTGTGTGTGTGTGTGTGAGGTGAGTGTAGTCTGTGGGATTATAGTGTGTGTGGAGTGGGGAGGTGTGTGTGATCTGTGTGAGGTGGTGTGTGTGTGTGTGTGTGTGTGAGGTGTGTGGTCTGTGGGATTATAGTGTGTGTGTGTGTGTGTGTGAG
14	66444917	66444918	195	TGTGTATATATATACACACGTGTGTATATATATGCATACATACACACATATACACACATATATACACAAAATATATACACATATATACATATATACACACACATATATACACACGTGTGTGTATATATATGTGTGTGTATATATGTATATATATGTGTATATATTTGTGTATATATGTGTGTATATGTGTGTATGT
14	67083013	67083014	2983	GACTGTCACTTCTCCTCCAAATAATCGCAACGTCTCTCCAGCAAGGGCGCAGAACTAGACAGAGGATGAGACAGACAAAGTGATAGAAGTAGGCTTCAGAAAATGGAAACTATGCTGAGCTAAAGGAGCATGTTTTAACTCAATGCAAAGAGCTAAGAACCTTGATAAAAGGTTAAAGGAGCTCCTAACTAGAATAACCACTTTAAAGAGGAACATAAATGACCTGGTGGAGAGAAAAAACACCGCTTGAGAACT
14	67150088	67150089	229	TGAACATATATATATGAACATATATATATGAACATATATATGAACATATATATATGAACATATATATGAACATATATATAGTACATATATATGTACATATATATATGAACATATATATATGTACATATATATGTACATATATATATGAACATATATATATGAACATATATATGTACATATATATATGAACATATATATATGAACATATATATATGAACATATATATGAAC
14	67170332	67170333	285	TTTGGAATAATTTCAGAAGGAATGGTACCATCTCCTCTTTGTACTTCTGGTAGAATTCCACTGTGAATTCATCTGGTCCTGGGCTTTTTTTGGTTAGTATGCTATTAATTGCTGCCTCAATTTCAGAACTTGTTATTGGTCAATTCAGGGATTCAACTTCTTCCTGGTTTAGTCTTGGAGGGTGTACATGTCCAGGAATTTATCCATTTCTTCTAGATTTTCTAGTTTATTTGCCTAGAGGTGTTTATAGTATTC
14	67862976	67862977	3260	AGGAGAATTGCTTGAACCCAGGAGGTGGAGGTCGCAGTGAGCCGAGATCATGCCATTACACTCCAGCCTGGGCAACAGAGCAAGACCCTGTCTCAAAAAAAAAAAAAAGAAAAGAAAAGAAAACTCTCTTAGAAAGACCAAAATGAAGGCTGGTTGTGGTGGTACACACCTGTGATTCTAGCTGCTCAGGAGGCTGAGGTGGGAGGATCACTCAAGCCAGGAGTTTGAGACCAGCCTGGGCAACATAGCGAGACT
14	69205450	69205451	248	GCTGAAGGTAGGGTACAGAGGGATTGGAGGCACTGAAGGTGGGGCACAGAGGGATTGGAGGCGCTGCAGGTAGGGCACAGAGGGATTGGAGGCACTGAAGGTAGGGCACAGAGGGATTGGAGGCGCTGAAGGTAGGGTACAGAGGGATTGGAGGCACTGAAGGTGGGGCACAGAGGGATTGGAGGCGCTGAAGGCAGGGCACAGAGGGATTGGAAGCACTGAAGGTAGGGCACAGAGGGATTGGAGGCG
14	69332831	69332832	2136	AAAAAAAAAGATACAGGGATCCTTGGGCCCAGCCCAGTCCCAGGTAGAAGAGGCTCTGCTTGATTAACTCTTCTTTTGGGGTTGGATACCAGGCTCTACAGAAGAGCAATATGAAGATGTCTCTGTCCTTGCTGAAATTCAGACAAGCAGCGTCTCCTCTAATCCTGGTGGGAACGATGGGGAAAGGGGAGTGGATGGAGAGTCCCACTAGAGGACTAAGTGGCTGTGGAAACCAACATGCCAGAATGTGCTGGC
14	69780364	69780365	159	AATATGACTCCTCCAGGGGTACTGATGAATGCACAGCTTTCCAACACTACTGTCCCACAGGCCTGGGAGGCCCTAGTTTAATTACATATCCAGAACACGAGATAGGAGCTGCCTGGGAAACCCACCTAAGGCCTCCAGTTAGATTTCCCAACACATCCTA
14	71280255	71280256	129	ACCAGCCTGGGCAACATGGTGAAACCCCATCTCTACAAAATAGAAAAATTAGCCAGGCATGGTGGTGCCTGTGGTCCTAGCTTTTGGGAGGCTGAGATGGGTGGACCACTTGAGCTGAGGAGTTCAAGAC
14	71480285	71480286	332	TAAGAACCAGGGAAACAGGCCGGGCGCGGTGGCTCACGCCTGTAATCCCAGCACTTTGGGAGGCCGAGGCGGGTGGATCATGAGGTCAGGAGATCGAGACCATCCTGGCTAACAAGGTGAAACCCCGTCTCTACTAAAAATACAAAAAAAAATTAGCCGGGCGCGGTGGCGGGCGCCTGTAGTCCCAGCTACTCGGGAGGCTGAGGCAGGAGAATGGCGTGAACCCGGGAAGCGGAGCTTGCAGTGAGCCGAGAT
14	72911560	72911561	141	CTGGATGTAATGCCTCCCACCTGTTCAAGACCCACCTGTTCAACCCTGGGGAGAAGACCCCAGGTTGGTGACCCCTGGTTTAGGACCACATATGGCAGGATGCTTGAGGGATCACTGGGCCCAAAATCGTATTTGCTGTGTC
14	73761579	73761580	1072	TTTAGGAGGCTGAGGTGGGTGGATCACTTGAGGTCAGGAGTTCAAGACCAGCCTGGCCAACATGGTGAAACTCTGTCTCTACTAAAAATACAAAAATTCGCTGGGTGTGGTGGCGGATGCCTGTAATCCCAGCTACTCAGGAGGCTGAGGCAGGAGAATTGCTTGAACCCAGGAGGCGGATGTTGCAGTGAGCCGAGATTGCACCATTGCACTCCAGCCTAGGCGACAGAGCCAGACTCCATTTAAAAAAAAAAA
14	73820293	73820294	135	GGCCTGTAATCCCAGCACTTTGGGAGGCCAAGGCGGGTACATCACCTGAGGTCAGGAGTTTGAGACCAGCCTGGCCAACATGGCAAAACCCTGTCTCTACCAAAAATACAAAAATTAGCCAGGCATGTTGGTGCCT
14	74928651	74928652	1090	TTGGTGGCACATGCCTGTAGTCCTAGCTACTTGGAAGGCTGAGGCAGGAGGATTGCTTGAGCCTGGAAGATCAAGGCTGCAGTGGGCCATGGTCACACCACTGCACTCCAGCCTGGGTGACAGAGTGAGACCATGTCTCAAAAGAAAAAAAAAAAAATTCTGAGGGTCAGGCATCAGGAAGTAGCTAGGCAAGATGGCTCAGGTCCCTTTCATGCGGCTGCAGTCAAGAGGGGGCTGCAGTTTCCTGAAGGTTTG
14	76698308	76698309	253	AGGCTGCAGTGAGCCTGCAGTGAGCCTGCAGTGAGCCTGCAGTGAGGCTGCAGTGAGGCTGCAGTGAGGCTGCAGTGAGCCTGCAGTGAGGCTGCAGTGAGGCTGCAGTGAGCCTGCAGTGAGCCTGCAGTGAGGCTGCAGTGAGGCTGCAGTGAGGCTGCAGTGAGCCTGCAGTGAGGCTGCAGTGAGGCTGCAGTGAGGCTGCAGTGAGCCTGCAGTGAGGCTGCAGTGAGGCTGCAGTGAGGCTGCAGTGA
14	77926813	77926814	309	TGCACCCTTCTTTTTTTTTTTTTTTTTTTTGAGACGGAGTCTCGCTCTGTCGCCCAGGCTGGAGTGCAGTGGCGGGATCTCGGCTCACTGCAAGCTCCACCTCCCGGGTTCACGCCATTCTCCTGCCTCAGCCTCCCAAGTAGCTGGGACTACAGGCGCCCGCCACTACGCCCGGCTAATTTTTTGTATTTTTAGTAGAGACGGGGTTTCACCGTTTTAGCCGGGATGGTCTCGATCTCCTGACCTCGTGATCCG
14	78982711	78982712	331	TCCTTCTTTTCTATTCTTTTTTTTTTTTTTTTTTTTTTTTTTTTTTTTTGAGACGGAGTCTCGCTCTGTCGCCCAGGTCGGACTGCGGACTGCAGTGGCGCAATCTCGGCTCACTGCAAGCTCCGCTTCCCGGGTTCACGCCATTCTCCTGCCTCAGCCTCCCGAGTAGCTGGGACTACAGGCGCCCGCCACCGCGCCCGGCTAATTTTTTGTATTTTAGTAGAGACGGGTTTCACCTTGTTAGCCAGGATGGTC
14	79723687	79723688	828	ACCACCATTACCACCACCACCACACATCACCACCACCACCACCACCATCACCACCACCACCATCACCACCACCATTACCACACCACACCACCATCACCACCACCACCACCACACCACCACCACCACCACCACCACCATACCACAACCACCACCACACACCCCACACACCACCACCACCACCACACCACCACCACCACCACCACCACCACCACCACCACACAACACCACACCATCATTACCATCACCACCACCACA
14	79723818	79723819	223	CCACCATCACACCACCACACCATCACCACCACCATTACCACACCACACCACCACTCACACACACCACCACCACCACATCACCACCACCATTACCACCACCACACCACCACCACCACACCACACACCCATCACCACACCACCATCACCACCCACCATTACCACCACCACCACCATCACCACCACCACCACCACCATCACCACCACCATTACCACCACCACCACCA
14	79723954	79723955	710	ACCACCACCACACCACCACCAATCATTACCATCAACCACCACCACCCACACCATCACCACCACCACCACACACCACCATCACACCACCACCATCACACCACCATTACCACCACCACCCACCATCACCACACCACCACCACCACACCATCACCACCACCATTACCACCACCACCACATCACCCACCACCCACCACCATCACCACCAACCACCATCACCACACCACATTACACACCACCACCACATCACCACACCAC
14	80528747	80528748	124	TATATATATATACACACACATATATATGTGTGTGTGTGTATATATATATATGTCCCTGTTATATATATATATATATATTTATATATATATATAAATATATATATATATATATAAAACAGGGACAT
14	81786774	81786775	2698	GACCATTTTTTTTTTAATTTATTTATTTATTTTTTTTATTGATCATTCTTGGTGTTTCTCGCAGAGGGGGATTTGGCAGGGTCATAGGACAATAGTGGAGGGAAGGTCAGTAGATAAACAAGTGAACAAAGGTCTCTGGTTTTCCTAGGCAGAGGACCCTGCGGCCTTCCGCAGTGTTTGTGTCCCTGGGTACTTAAGATTAGAGGAGTGGTGATGACTCTTAACGAGCATGCTGCCTTCAAGCATCTGTTTAAC
14	82753870	82753871	623	GAAAAGAAAATAAAAAACTATTTTAAATATTATTAACAAAATAATGAAAATTAACAGAATATATACAAGATTTCTAGACTAAAAAACTATAAACATGGCTAAGAGCAACTAAATAAGACCCAAATAAATGGAGAGACTTGTCATGATTATTGACTGACTCACTCATATTGCTAAAATGTCCATTTTCCTCAAATTGATCTATAAAGTCTATGCCATTCCAATTACAATTCTAGTAGGCTTTCGTAAGAATTAACA
14	83142107	83142108	87	ATAGGAATATATATAGGAATATATATATATAGGAATATATATAGGAATATATATATATAGGAAATATATATATATAGGAATATATATA
14	83277085	83277086	97	GGAAAGAAAGAAGGAAGGGAGGAGGAGGAAGCAAGGAGGGAGGTAGGGAGGAAGGAAGGAAGGAAAGAAGGAAGGGAGGCAGGGAGGAAGGAAGGAAG
14	83984642	83984643	72	TATATATGTATATATACATATATATCTATATGTATGTATATATGTATATATACATATATATCTATATGTATGT
14	86082067	86082068	180	CTTAGAAAATTTTCCCAGGGTCATATCTGACTTATAGCTTCTGGAGTTAAGCAGTTCATGCCAAAAATCAGACACAGGTAGGTACATAATCCACAGGCCTAACTACACTACAAATCTGGAAACACTAAAGCAATTTATAGATTTTATGCACATTTCCACAGTCGTAACTATAGGTTATAAA
14	86896756	86896757	1010	AGGAAAAACACATAAAAATGATAACCAGCAGAGCCAAAAGCTAGCTATTAGTCATCAAAAATGAAAATGAAAACTACAGTTTATTATTAACTAAACACCCCCTAGAAAAGTAATATTAAAAAGATTGGCAATAATGAGTTTCTCCAAAATTAGGAATAATTGTGACACTTATACTCTGTTAATCTAGTGTAAATTAGTCCAATTACTTAGGGAATCTACTTGGCAGTATAAAGTTGAACATGTACATACACTGTG
14	86942205	86942206	56	CACATATACACACACACGTGTGTGTGCGCACATATACACACACACGTGTGTGTGCGC
14	88013749	88013750	363	TAAGAAAGGTGGCACCTGTAATTTCAGCTATTCAGGAGGCTGAGGCAAGAGAATTGCATGAACCCGGGAGGCAGAGGTTGCAATGAGCCAAGATTGTGCCATTGCACCCCAGCCTGGGCAACAACAGCGAAACTCCATCTCAACGAAAAAACAGACTTTCGAGTGATCACCATCTCCAACAATACAACACTCTGAATCACTCTTTTGGAGTTTCACAATGCTGAGTTGTGTAGAGGACCTTAAAGAAGTCCTGCA
14	88776550	88776551	96	ATATACCATATGATATGGTATATCATATACCATATCATATGGTATATGATATACCATATCATATGGTATATGATATACCATATGATATGGTATATCA
14	89412792	89412793	65	GGGAGAGGAGGAAAGAGAGAGAGGGAGAGGAGGAAAGAGAGAGAGGGAGAGGAGGAAAGAGAGAGA
14	91759851	91759852	1499	AGCTCACCTTCCCATCCTCACCCGCCAGAGCTCACCTTCCCATCCTCACCTGCCACAGCTCACCTTCCCATCCTCACCCGCCAGAGCTCACCTTCCCATCCTCACGTGCCACAGCTCACCTTCCCATCCTCACCCACCACAGCTCACCTTCCATCCTCACCCGCCACAGCTCACCTTCCCATCCTCACCCGCCACAGCTCACCTTCCCATCCTCACCCGCCACAGCTCACCTTCCCATTCTCACCTGCCACAGCT
14	94189120	94189121	98	ATGATGGTGAAGGTCATATTGGTGGTGGTGATGGTGATAATGATGGTGGAGGTGGTATTGGTGGTGGTGATGTGGTGGTAGAGGTGGCAATGGCGGTGG
14	94830104	94830105	2020	GTGTGTGCATTCGTGATTATGCCATGCCCTGCTGATCTAGTTTATTTTTATTTTTACACCGTAAAACCAAGATGAAAATACGAAAGTCTCAGGTTCATAATAGGAATCGAGGCTGGAATTTCTCTGTCCCATGCAAACGCCTCCTGAGGTACCTGCTCCAGGGGTTGAGAAAGACAAGGAGGCTGAGAGAATAACTGATCAGAGAGCCCAGAGCCAGGCTGCCCGCTCACACCAGACCGTGCTTGGGCGGCTCTG
14	94986011	94986012	440	CTGGAGGTGGTGATGATGGAGATGATGGTGGTGATGGAAGTGGTGGTGGTGATGGTGATGATAATAGTTGTGATGGTGGTGGTGATGGTAGTGATGGAGGTGGTGGTGGTGATGGTGATGATAATAGTTGTGGTGATGGAGGTGGTGATGGAGGTGGTGGTGATGGTGGTGGTGCTGGTGATGGTGTTGATGGAGCTGGAGGTGGTGATGATGGAGATGATGGTGGTGATGGAAGTGGTGGTGGTGATGGTGATG
14	95363416	95363417	74	TGTCTGTGTGTATGTTTGTGTGTCTCTGTATGTGTGTGTCTGTGTGTGTCTCTGCATCTCTGTGCATATGTGTGT
14	95886237	95886238	788	CTACCACCATCACCACCACCATCACCATCATCCTTAACACCATTGCCCTCACCATCACCACCACCACCATCACACCACCGTCATCCTTACCACCATTACCCTCACCATCACCACCACCACACTATCTCTACCTCCATCACCATCACTATCACCATCACCACCACCATCACCATCACCATCATCCTTACCACTATCACCCTCACCATCACCACCACCATCTCTACCTCCATCATCATCACTATCACCATCACCACC
14	96048917	96048918	232	TATACAATATACACATATATGTGTGTATATACGTATATACATATACACATACATATATACATATATACATGTTATACATGTCATATAACATCTGTTATACATGTCATATAACATCTGTTATACATGTCATATAACATCTGTTATACATGTCATATAACATCTGTTATACATGTCATATAACATATGTTATACATGTCATATAACATATGTTATACATGTCATATAACATATGT
14	98494392	98494393	330	TTTTGTTTTGTTTTGTTTTTTTTTTTTTTGAGACGGAGTCTCGCTCTGTCGCCCAGGCCGGACTGCGGACTGCAGTGGCGCAATCTCGGCTCACTGCAAGCTCCGCTTCCCGGGTTCACGCCATTCTCCTGCCTCAGCCTCCCGAGTAGCTGGGACTACAGGCGCCCGCCACCGCGCCTGGCTAATTTTTTGTATTTTTAGTAGAGACGGGGTTTCACCTTGTTAGCCAGGATGGTCTCGATCTCCTGACCTCAT
14	99145118	99145119	57	TTTTTTAGATGGAGTCTCTCTTTGTTGCCCAGACTAGAATGCAGTGGCATGATCTCGG
15	100898980	100898981	289	TTTTTTTTTTTTTTTTTTTTTTTTTTTTTTTTTTTTTTTTTTTTTTTTTTTGAGACGGAGTCTCGCTCTGTCGCCCAGGCTGGAGTGCAGTGGCGGATCTCGGCTCACTGCAAGCTCCGCCTCCCGGGTTCACGCCATTCTCCTGCCTCAGCCTCCCAAGTAGCTGGGACTACAGGCGCCCGCCACTACGCCGGCTAATTTTTTGTATTTTTAGTAGAGACGGGGTTTCACCGTTTTAGCTGGGATGGTCTCGAT
15	101095202	101095203	1043	ATGAGGAACGGGTGGATGACTTCCTTCCAGACGCAGATGAGGGACGGGTGGATGACTTCCTTCCAGACGCAGATGAGGGACGGGTGGATGATTCCTTCAGGACGCAGATGAGGAACGGGTGGATGACTTCCTTCGGGACGCCGATGAGGAACGGGTGGATGACTTCCTTCCGGACGCAGATGAGGGATGGGCGGATGACTTCCTTCCAGACGCAGATGAGGGACGGGGCGGATGACTTCCTTCAGGACGCAGATG
15	101096218	101096219	109	TTCCTTCGCGGACGCAGATGAGGGACGGGCGGATGACTTCCTTCCAGACGCAGATGAGGAACGGGCGCGATGACTTCCTTCAGGACGCAGATGAGGACGGGTGGATGACT
15	101096611	101096612	107	TTCCTTCCAGACGCAGATGAGGAACGGGCGGATGACTTCCTTCGGGACGCCGATGAGGAACGGGTGGATGACTCCTTCAGGACGCAGATGAGGAACGGGCGGATGACT
15	101098389	101098390	73	GATGACTTCCTTCCGGACGCAGATGAGGAACGAGCAGATGACTTCCTTCCGGACGCAGATGAGGGACGGGCGGG
15	101250555	101250556	1676	GAAGTGGAAGTGGAGGTCATGGTGGAGGTGGAAGTGGAGGTCATGGTGGAGGTGGAGGTGGAGGTCATGGTGGAGATGGAGGTGGAGGTCATGGTGGAGGTGGAGGTCATGGTGGAGGTGGAAGTGGAGGTCATGGTGGTGGTGGAGGTGGAGGTCATGGTGGAGGTGGAGGTCATGGTGGAGGTGGAGGTCATGGTGGAGGTGGAGGTGGAGGTCATGGTGGAGGTGGAAGTGGAGGTCATGGTGGTGGTGGAG
15	101481632	101481633	94	TGTCTGTGTCTCTGTGTGTGTCTTTGTGTGTGTGTGTGCCTGTATCTGTGTGCGTCTGTGTCTCTGTGTGTGTCTGTGTGTGTGTGTCTGTGTCT
15	101662271	101662272	300	TGGGAAGTCTTTGGCCCTGCACCCCAGCGTCTGGATGGGAAAAGCTGTTTTGGGAAGTCTTGGGCCCTGCACCCCAGCGTCTGGATGGGAAAAGCTGTTTTGGGAAGTCTTGGGCCCTGCACCCCAGCCTCTGGATGGGAAAAGCTGTTTTGGGAAGTCTTGGGCCCTGCACCCCAGCGTCTGGATGGGAAAAGCTGTTTTGGGAAGTCTTGGGCCCTGCACCCCAGCGTCTGGATGGGAAAAGCTGTTTTGGGA
15	101725619	101725620	80	CCTCCATGGAGCACCCTCCATCCTCCTTCCCTGTGAACACTCTCCATGGAGCACCCTCCATCCCCCTTCCCTGTGAACGCC
15	101927957	101927958	52	AAGCCAGATGGTTCTGGGTGGAGATGCTCCCTGAGAGTCTGGGGAGGACCCCC
15	101930394	101930395	163	GGCTCTGCCTGCCCTCCTCGGAGGCACTGGCCCAGGCTGGGTGTGGGATGGATTCTGGACCTCACTACCACTCAGGCTGATGTGTATCTCCCGTTGGACTCAAACGGGAAGCGGGTGCTGGGGGTTCAGCCTGTGTGGGTTCAGGTGTGCTACTGCTAGCTGGG
15	102033573	102033574	287	CCCTCCTCCCCCTCCCCCTCCCCTCCCCTCCCCCTCCCCTCCCCCTCCCCCCTCCCCCCCCCTCCCCTGCCCTCCCCCCCCCCTCCCCACTTCCCCTCCTCTCCCCTTGCCCTCCCCTCCTCCCCCTCCTAATCCCTCCCCCCTCCCCCTCCCCCCCCCCCCCCATCCCCCTCCCCACTCCCCTCCCCCTCCCACTCCCCCTCCCCCTCCCCTGCCCTCCCCTCCCCTCCCCTGCCCTCCCCCTCCCCCCTCCCC
15	102304761	102304762	802	GCAGACCAAGGAGTTCATCTTCTCAGAGCTGCTGTCCAACCTGTACTCGCGTGGGAACGAGAAGACACTCGTGGAGGCGTCGGCAGAGCAGGCAGACCAAGGAGTTCATCTTCTCAGAGCTGCTGTCCAACCTGCACTCGCGTGGGAACGAGAAGACACTCATGTAGGAGTCGGCAGAGCAGGCACAGCGGCGTGACGAGACTCGCGTGGGAAGAAGAAGACACTCCTGGAGGAGTCGGCAGAGCCGGCAGACCA
15	20109050	20109051	113	TCATTTTCTTCATCTCATCATTTCATCATTTCATCTCATGATTTCATCTCTATCATCATTTCATTTCATTCTTTCATTTCATTCATCATCATTTCATCTCAACATTTCATTTCA
15	20348488	20348489	288	CCTTCCCTGCTTGAGACCTTGCCCTGGTTCTCCCATGGCCCTGACCCTGAAATGCCTGGCCCTACCCTGGCCTTGCACTGCTCTGGCCCTTGCCCTGACTCTGGTCCTGTCACTGACCTAGCCCCAGCCCTGTTGCTGGTCTTACCGTGGCCCAGACCCTGCCTTGGCCCTGCCCTGACACTGTCCTGGACCCTGGCTGTGCCAAGAACCTGTACTGTCCTTGCCCTTGTTTTGCTCCTGCCCCGAACCTGGTCC
15	20498473	20498474	4446	CTCCGCCTCCTGGGTTCAAGCGATTCTCCTGACTCAGCCTCCCGAGTAGCTGGGATTACAGGCACCTGCCACCATGCCCAGCTAATTTTTGTATTTTTAGTAGAGATGGGGTTTCACCATGTTGGTCAGGCTGGTCTTGAACCCCTGACCTCAGGCAATCCACCCGCCTCCCTCCCAAAGTACTGGGATTAGAGGCATGAGCTACCATGCCCGGCCGCCCTTCTCTGTTTCTAGAGCATTTTGTATTAACTCCCT
15	20609595	20609596	63	AAAGTGTATTTAAAAGCAGTTGCACATACATACAGTTGCCTGATACATGAAAGTGAAACACTAG
15	20875435	20875436	307	CAAACAAAAAAAAAAAAAAAAAAAAAAAAAAAGGCCGGGCGGTGGCTCACGCCTGTAATCCCAGCACTTTGGGAGGCCGAGGCGGGCGGATCACGAGGTCAGGAGATCGAGACCATCCTGGCTACACGGTGAAACCCCGTCTCTACTAAAAACAACAAAAATTAGCCGGGCGAGGTGGCGGCGCGCCTGTAGTCCCAGCTACTCGGAGGCTGAGGCAGGAGAATGGCGTGAACCCCAGGGGCGGAGCTGCAGTGA
15	21355102	21355103	288	TTCCCTGCTTGAGACCTTGCCCTGGTTCTCCCATGGCCCTGACCCTGAAATGCCTGGCCCTACCCTGGCCTTGCACTGCTCTGGCCCTTGCCCTGACTCTGGTCCTGTCACTGACCTAGCCCCAGCCCTGTTGCTGGTCTTACCGTGGCCCAGACCCTGCCTTGGCCCTGCCCTGACACTGTCCTGGACCCTGGCTGTGCCAAGAACCTGTACTGTCCTTGCCCTTGTTTTGCTCCTGCCCCGAACCTGGTCCTG
15	22292993	22292994	1975	TGTGGAGAAATGGGAACACTTTTACACTGTTGGTGGGACTGTAAACTAGTTGAATCATTGTGGAAGTCAGTGTGGCGATTCCTCAGGGATCTAGAACTAGAATTACCATTTGACCCAGCCATCGCATTACTGGGTATATACTCAAAGGATTATAAATCATGCTGCTATAAAGACACATGCACATGTATGTTTACTGCAGCACTATTCACAATAGCAAAGACTTGGAACCAACCCAAATGGCCAATAAAGATAGAC
15	22542872	22542873	89	CGGGAGGGGTGGGGAATGGGGGTGGGGGAGGGGTGGGGGATGGGGTGGGGATGGGATGGCGGAGGGGTAGGTGGGGTGGGGGAGGGGAGG
15	22769068	22769069	317	TTTTTTTTTTTTTTTTTTTTTTGAGACGGAGTCTCGCTCTGTCGCCCAGGTGGGACTGCGGACTGCAGTGGCGCAATCTCGGCTCACTGCAAGCTCCGCTTCCCGGGTTCACGCCATTCTCCTGCCTCAGCCTCCCGAGTAGCTGGACTACAGGCGCCCGCCACCGCGCCCGGCTAATTTTTTTTGTATTTTTAGTAGAGACGGGGTTTCACCTTGTTAGCCAGGATGGTCTCGATCTCCTGACCTCATGATCCA
15	23128334	23128335	153	CTCACTGTACTTCCTGCATCTAGAGTTTCTGCTTCTTTTCATCCTTTCATTCCCAGACTGTGCAGCTGTTTACCTTGTTGCTTTGTAAAATACTCTATCTAGTTCCTTCTTCCATGAGAAAAGGAGGGAAACTGCTCTCGATACTACCAAGTTC
15	23288825	23288826	136	CACCTTAGCCTCCCAAATAGCTGGGACTACAGGCACATGTCACCATGCCTGGCTAATTTTTGTTTGTTTGGTGGAGACATGGTTTTGCCATGTTGCTCAGGTTGGTCTTGGAACTCCTGAGCTCAAGTGATCCTCCC
15	23685203	23685204	479	GGAAGAGAAGATGTGGGAGCAGCAGAGGCTACCCGAACAGAAGGAGAAGCTGTGGGAACACGAGAAGATGCAGGAGCAGGAGAAGATATGGGAGCAGGAGAGGAGAAGATGCGGGACCAGGAGGAGAAGATGCGGGGCCAGGAGGAGAAGATGCGGGGGCAGGAGGAGAAGATGCGGGGGCAGGAGGAGAAGATGTGGGGCAGGAGAGGAGAAGATGTGGGGGCAGGAGGAGAAGATGTGGGGCCAGGAGGAGAA
15	23685330	23685331	64	AGGAGCAGGAGAAGAAGACATGGACGACAGGAGAAGATGCGAGAGGAGGAGAGCATGCGGGAGCG
15	23685467	23685468	232	AGAAGATGCAGGAGCAGGAGGAGAAGATATGGGAGCAGGAGAAGATGCGGGACCAGGAGGAGAAGATGTGGGGCCAGGAGGAGAAGATGTGGGGGCAGGAGGAGAAGATGTGGGGCAGGAGGAGAAGATGCGGGAGCAGGAAGATGTGGAGACAGGAGGAGAGGCTGCAGGAGCAGGAGAAGCAGATGTGGGAGCAGGAGGAGAAGATGCGGAAGCAGGAGGAGAAGATGCGG
15	23707580	23707581	412	GGAGTCTCGCTCTGTCGCCCAGACTGGAGTGCAGTGGTGCAATCTCGGCTCACCGCATCCTCCGCCTCCCAGGTTTAAGCAATTCTCTGCCTCAGCCTCCCGAGTAGCTGGGATTACAGGCGCCCACCACCACGCCCGGCTGATTTTTTTTTTGTATTTTTAGTAGAGACAGGGTTTCACCATCTTGGCCAGGCTGGTCTTGAACTCCTGACCCAGTGATCCACCCACCTCGGCCTCCCAAAGAGCTGGGATTAC
15	23743612	23743613	788	TATGAGGAGTTATCTATGTTGCAGGCATTGTTTCTATATGAGGAATAAGCTATGCTGCAGGCATTGTTTCTTTATGAGGGGTTAGCTATGCTGCAGGCATTGTTTCTATACGAGGAGTTATCTATGTTGCAGGCATTGTTTCTATATGAGGAATAAGCTATGCTGCAGGCATTGTTTCTTTATGAGGGATTAGCTATGCTGCAGGCATTGTTTCTATATGAGGGGTTAGCTATGCTGCAGGCATTGTTTCTATAT
15	23902415	23902416	348	GCCGGGCGCGGTGGCTCACGCCTGTAGTCCCAGCACTTTGGGAGGCCGAGGCGGGTGGATCATGAGGTCAGGAGATCGAGACCATCCTGGCTAACAAGGTGAAACCCCGTCTCTACTAAAAATACAAAAAATTAGCCGGCGCGCGTGGCGGGCGCCTGTAGTCCAGCTACTCGGGAGGCTGAGGAAGGAGAATGGCGTGAACCCGGGAAGCGGAGCTTGCAGTGAGCCGAGATTGGCGCCACTGCAGTCCGCAGT
15	24040140	24040141	136	TGCTTCAGCCTCCCCAACCGTCTCCTTTTATTGGAGGATATTATTTAGCTTCAGCTCTCCAACCGTCTCCTTTTATTGGAGGATATTATTTAGCTTCAGCCTCCCAACCGTCTCCTTTTATTGGAGGATATTATTTA
15	24591229	24591230	302	TTTATTCTTTTTTTTTTTTTTTGAGACGGAGTCTCGCTCTGTCGCCCAGGCTGGAGTGCAGTGGCGCGATCTCGGCTCACTGCAAGCTTCCGCCTCCCGGGTTCACGCCATTCTCCTGCCTCAGCCTCCCGAGTAGCTGGGACTACAGGCACCCGCCACTACGCCCGGCTAATTTTTTTGTATTTTTAGTAGAGACGGGTTTCACCGTGTTAGCCAGGATGGTCTCGATCTCCTGACCTCGTGATCCGCCGCCTC
15	24871851	24871852	365	AAAGTCGCTTCCATATTTTGGGGTATCTTTATAGCAGTACCCCATTCCTGGTACCAATTTACTGTATTAGTCCAATCTCACACTGCTAATAAAGACATACTTGAGACTGGGTAACTTATAACAGAAAGCAGTTTAATTGACTTACTGTTCAGCATGGCTGGGGAGGCCTCAGGAAACTTACAATCATGGTGGAAGGGAAAGCAAACATGTTTTTCTTCACTTGGTAGCAGGAAGGAGAAGTGCCAAAAAATTGGG
15	24957614	24957615	51	TATATATGTTACACACATATATATATGTTACACACATATATATGTTACACAC
15	26002964	26002965	577	GATCGGAATGAGTTAGGGTGGAGCAGGTGGTCGGAATGAGTTAGGGTGGAGCAGGTGATCGGAATGAGTTAGGGTGGAGCAGGTGGTCGGAATGAGTTAGGGTGGAGCAGGTGGTCGGAATGAGTTAGGGTGGAGCAGGTGATCGGAATGAGTTAGGGTGGAGCAGGTGGTCGGAATGAGTTAGGGTGGAGCAGGTGGTCGGAATGAGTTAGGGTGGAGCAGGTGGTCGGAATGAGTTAGGGTGGAGCAGGTGGT
15	26003132	26003133	240	GGTCGGAATGAGGGTGGAGCAGGTGGTCGGAATGAGTTAGGGTGGAGCAGGTGGTCGGAATGAGTTAGGGTGGAGCAGGTGGTCGGAATGAGGGTGGAGCAGGTGGTCGGAATGAGTTAGGGTGGAGCAGGTGATCGGAATGAGTTAGGGTGGAGCAGGTGATCGGAATGAGTTAGGGTGGAGCAGGTGGTCGGAATGAGGGTGGAGCAGGTGATCGGAATGAGTTAGGGTGGAGCAGGTG
15	26003643	26003644	107	AGCAGGTGGTCGGAATGAGGGTGGAGCAGGTGGGTCGGAATGAGTTAGGGGTGGAGGCAGGTGGTCGAATGAGTTAGGGTGGAGCAGGTGGTCGGAATGAGGGTGGAG
15	26003983	26003984	51	TAGGGTGGGAGCAGGTGGTCGAATGAGTTAGGGTGGAGCAGGGGTCGGAATG
15	26141234	26141235	304	CTGGCCGGCGCGGTGGCTCACGCCTGTAATCCCAGCACTTTGGGAGGCCGAGGCGGGCGGATCACGAGGTCAGGAGATCGAGACCATCTCGGCTAAAACGGTGAAACACCCGTCTCTACTAAAAATACAAAAAAATTAGCCGGGCGTAGTGGCGGGCGCCTGTAGTCCAGCTACTTGGAGGCTGAGGCAGGAGAATGGCGTGAACCCGGGAGGCGGAGCTTGCAGTGAGCCGAGATCCCGCCACTGCACTCCAGC
15	26851924	26851925	60	GATATATCGATAGATAGATATATCGATAGATAGATATATCGATAGATAGATCTATCTATCG
15	26872525	26872526	326	TTATTTTTTTTTTTTTTTTTTTTTTTTTTTTGAGACGGAGTCTCGCTCTGTCGCCCAGGCTGGAGTGCAGTGGCGCGATCTCGGCTCACTGCAAGCTCCGCCTCCCGGGTTCACGCCATTCTCTCCTGCCTCAGCCTCCCGAGTAGCTGGGACTACAGGCGCCCGCTACCACGCCCGGCTAATTTTTTGTATTTTTAGTAGAGACGGGGTTTCACCGTGTTAGCCAGGATGGTCTCGATCTCCTGACCTCGTGAT
15	27138562	27138563	400	ATGGTGTGTTGTGGGTATGGTGTGGTGTGTGTGGGGCTATATGGGGTGTGTGTGTATGCTGTGGTGTATGTGTATGGTGTGTTGTGTGTGCATGGTGTGTGTATGTAGTGGTGTGGTGTGTGTATATGTGTGTGTATGGTGTGTAGCATGTGTGTATAGTGTGTGTGTGCATGTGTGGTGTGTGTGGTGCGTGTGTTATGATGTGTGTGTATAGTGTGTGGAGTGTGTGTGTATTGTTGTGTGTATATGGTGTGT
15	27700711	27700712	184	TGGTGTGTGTGTGGTGTGTATGTGTGCTATGTGTGTGTGCATTTGTATATATGTGCATGGTATATGTATGCCGTGGGTGGTTTGTGTGTGTGATGTGTGTGTGTATGTGTGCTGTGTGTGTGTGCATTTGTGTATATGTGCATGGTGTGTGCATGCTATGTGTGGTTTGTGAGTTTGTGTGTGTG
15	28094088	28094089	155	TGTGGCTGTGTTCACACCAATCCAGGCAGCATGTGGCTGTGTTCACACCAATCCAGGCCACACGTGGCTGTGTTCACACAAACCCAGGCAGCACGTGGCTGTGTTCACACCAATCCAGGCAGCACATGGCTGTGTTCACACCAACCCAGGCAGCAC
15	28174960	28174961	124	TTCAAATGGGAAAAATTTTTTTTTTTTTTTTTTTTTTTGAGACAGAGTCTCGCTCTGTCGCCCAGGCTGGAGTGCAGTGGCGCGATCTCGGCTCACTGCAAGCTCCGCCTCCCGGGTTCACGCCA
15	28430082	28430083	237	TTGTAGGGGCAACCCACCCCTACATCTGGTGCCCCTGTGGGTGTTTCTCGTAAGGTGGGACGAGAGATTTGGAAAAGAAAAAGACACAGAGACAAAGTATAGAGAAAGAAATAAGGGGACCCGGGGAACCAGCGTTCAGCATATGGAGGATCCCCTTATTTCTTTCTCTATACTTTGTCTCTGTGTCTTTTTCTTTTCCAAATCTCTCGTCCCACCTTACGAGAAACACCCACAGGTG
15	29850884	29850885	1743	TCCCACCTCCTCCTCCACTTCCTGCACCTCCTCCTCTACCTCCTCCACCTCTTCCACCTCTTCAACCTCCTCCACCTCCTCATCCTCCACCACCACCTCTTCTACCTACTCCTCCACCTCCTCCACCTCCTGCTCCACCTCCTCCTCCACCTCCTCCTCCACCTTCTCCACCTCCTCCTCCTCTACCTCCTCCTTCACTTCCTCCACCTCCTCCTCCACCCTCCTCCATTCCTCCACCACTCGTCCTCCACCTCC
15	29853208	29853209	6869	CACAGAAGACCATGTGACCACAAAGCCTAAACACTGACTCTTCTGTATAGAAACGTTGGTCCATCTCTGGTCTACACATTTTCCTCCCCCAGTGCTATCTTATGGCTCCTCCATCATGGTGGAAGACATGGAAGGCAAGGGACAGATGGCCAATGTCCAGTCCTCATTCATTCAATCATGTGGAGTAGTACAGGGTGCTACGGTGCTATGTCCCTTCTTAGGGACCCAAGAAGCTTCTTCACTTCTAAATCTCTC
15	30465284	30465285	1103	TGTGTGTGTGATGTGTGTGTGGTATCTGTGTGTGTGTGTGTGGTGTCACAGGGTGTGTGTGTGGTGTGTATGACATGTAGCACAGTGTGTGTGGTGTGTAGTAGGATGTGTGTGTGTGTGTGTGTGTGCATGTGGTGTGTAGGGTGTGTGTGTGGTGTTGTGCTGTGTGTGTGTGTGTAGTAGGGTGTGTGTGTGGTGTGTAGTAGGGTATGTGTGGTGTGTAGTAGTGTGTGTGGTGTGTGGTGTGTGTGGCAT
15	30924345	30924346	593	CGCGGCGCCGGGGGCTCACGCCTGTAATCCCAGCACTTTGGGAGGCCGAGGCGGGCAGATTACGAGGTCAGGAGATCCAGACCTTCCTGGCTAACACAGTGAAACCCCGTCTCTACTAAAAATACAAAACATTAGCTGAGTGTGGTAGCACGCACCTGTAGTTCCAGCTACTCGGGAGGCTGAGGCAGGGAATGGCATGCCAGGAGGCGGAGCTTGCAGTGAGCCAAAATTGTACCACTGCACTCCAGCCTGGGC
15	31715367	31715368	65	CGTATACGTATACGTATATATACGTATATATTACGTATACGTATACGTATATATACGTATATATAT
15	32496545	32496546	331	TGAGAGAGGGTGAGAGAGAGGGCGAGAGAGCGAGAGAGAGAGCGAGAGAGAGGTGAGAGAGAGAGCGAGAGAGAGGCAGAGAGGGTGAGAGAGGGTGAGAGAGAGGCGAGAGAGCGAGAGAGAGAGCGAGAGAGAGGGTGAGAGAGAGAGCGAGAGAGAGGGCGAGAGAGAGAGCGAGAGGAGGGTGAGAGAGAGGGTGAGAGAGAGAGTGAGAGAGGGTGAGAGAGAGGGTGAGAGAGGGTGAGAGAGGGTGAG
15	32657592	32657593	1544	GTGTGTGCATGTGGTGTGTGTGGTGTGTAGTAAGGTGTGTACGGTGTGTCTGTGTGGTGTGTAGTAGAGTGTGGATGTGTGTGTGGTGTGTGTGGTGTTTAGTAGTATGTGGGGTGTGTAGTGGGTGTGTGTGTGATGTGTGTGTGGTATCTGTGTGTGTGTGTGTGGTGTCACAGGGTGTGTGTGTGGTGTGTATGACATGTAGCACAGTGTGTGTGGTGTGTAGTAGGATGTGTGTGTGTGTGTGTGTGTGCA
15	34638841	34638842	2157	GGAAGGCTGAGGCGGGTGGATCACCATGTTGGCCAGGCTGGTCTCGAACTCCTGACCTCAAGTGATCCACCTCCCTCGGCCTCCCAAAGTGCTGAGATTACAGGCGCTTGAGGTCGGGAGTTCGAGACCAGCCTGACCAACGCGTGGAGAAACCCTATCTCTACTAAAAATACAAAAAAAAATTAGCCGGGCATGGTGGCACATGCCTGTAATCTTAGCTACTCGGGAGGCTGAGGCAGGAGAATCACTTGAATC
15	35401642	35401643	127	CTCTAACACCTGAGGTCTCTGATACCTGAAGAGGATGCAACTTTAGGGACATCTTTTTACTATTCTAAGCCACTGCATAATTTGAACTGAGATTGTAACATGGTTTGAAATTGGCTGTATTTGCTGCT
15	39776573	39776574	323	TTAAGAATTGCAGGCCGCGCGCGGTGGCTCACGCCTGTAATCCCAGCACTTTGGGAGGCAGAGGCGGGCGGATCATGAGGTCAGGAGATCGAGACCATCCTGGCTAACGCGGTGAAACCCCCGCCTCTACTAAAAATACAAAAAATTAGCCGGGCGTGGTGCGGGCGCCTGTGGTCCCGGCTACTCGGGAGGCTGGGGCAGGAGAATGGCGTGACCCGGGAGGCGGAGCTTGCAGTGAGCCGAGGTCGCGCCACT
15	39994638	39994639	422	TAAAAAGTAGTTTTGAAGAGAAAATCCACCTAGCTCAAGAGTATTTGGTAGGGAAAGCAGGTTTAAAATAAAAAGACAACCCACCCCCTGCCCTTTTGCTTCCCTCCCATCAGTCTGGTTGACAGGAAGAAACCACACCATCAACACCAACAAGTTTCTGTGTTCCTTTTACAGCAAAAGGGACTTTTTATATAACCAAATGTGGTGTTTTAGTGACTTTTTGATAATGTACAGTTTTTTGTGAATTTAAATTTA
15	41039871	41039872	317	TGAAAAGGCCCTTTGGCGCGGTGGCTCACGCCTGTAATCCCAGCACTTTGGGAGGCCGAGGCGGGCGGATCACGAGGTCAGGAGATCGAGACCATCCTGGCTAACACGGTGAAACCCCGTCTCTACTAAAAATACAAAAAAAATTAGCCGGGCGTGGTAGCGGGCGCCTGTAGTCCCAGCTACTCGGGAGGCTGAGGCAGGAGAATGGCGTGAACCCGGGAGGCGGAGCTTGCAGTGAGCCGAGATGGCGCCACT
15	41100333	41100334	320	AAAAAGAGTAGCTTTGGCCGGGCGGCGGTGGCTCACGCCTGTAATCCCAGCACTTTGGGAGGCCGAGACGGGCGGATCACGAGGTCAGGAGATCGAGACCATCCTGGCTAACACGGTGAAACCCCGTCTCTACTAAAAATACAAAAATTAGCCGGGCATGGTGGCGCGTGCCTGTAGTCCCAGCTACACAGGAGGCTGAGGCAGGAGAATGGCATGAACCCGGGAGGCGGAGCTTGCAGTGAGTCGAGATTGCGC
15	44502006	44502007	292	GATACACTTTGGGAGGCCGAGGCGGGTGGATCATGAGGTCAGGAGATCGAGACCATCCTGGCTAACAAGGTGAAACCCCGTCTCTACTAAAAATACAAAAAATTAGCCGGGCGCGGTGGCGGGCGCCTGTAGTCCCAGCTACTCGGGAGGCTGAGGCAGGAGAATGGCGTGAACTCCGGGAAGCGGAGCTTGCAGTGAGCCGAGATTGCGCCACTGCAGTCCGCAGTCCGACCTGGGCGACAGAGCGAGACTCCG
15	45452841	45452842	54	TCTAATTCCTCATGGAATGCTATGGAGGGTGGTGTCAGGGATCTAGAAAAATACT
15	45989680	45989681	3190	GATAGTTTTCTTTTTTTTTTTTTTTTTTTTTTTTTTTAAATTTATTTTTTTATTGATAATTCTTGGTGTTTCTCACAGAGGGGGATTTGCAGGGTCATGGGACAATAGTGGAGGGAAGGTCAGCAGATAAACAAGTGAACAAAGGTCTCTGGTTTTCCTAGGCAGAGGACCCTGCGGCCTTCCGCAGTGTTTGTGTCCCTGATTACTTGAGATTAGGGATTGGTGATGACTCTTAACGAGCATGCTGCCTTCAAG
15	47371923	47371924	831	TTTTTTTTTTCTGACAAACTCATCTTTTATTTTTGATGTGTGTGTGTGTTTTTTTTAACAGGGATTTGGGGAATTATTTGAGAAAACAAAACAATAACAACAGAAAAACTTCTAATGGTGATGATAGCCTCTTCTTCAGTAATTTCTCACTTCTTGGTACTCCTGTCCTGAAAGATATTTCAAGATAGAAAGAGGACAGTTGTTGGCGTTGCTGGATCCACTGGAGCAGGCAAGTAGTCTCTTTTATTCTTCACT
15	48605563	48605564	56	GGTCTTTCCACATCGGGCCTAGCTCCTCCTCTGCCTCATTTCAACATCTTCTCAAAG
15	51126030	51126031	56	TACAGATGTGTGATATACGTATATATATACAGATGTGTGTATATACGTATATATATA
15	51126205	51126206	89	ATATATACGTATATATATACAGGTGTATATATATGGTATCTATATACACATCTGTATATATACGTATATATACAGATGTGTATATATACG
15	51169677	51169678	60	CTCTCTGAGCCTCAATTTCCTCATTCTTCATATAAAGGGCTTGGACTATTGATTTCTCAAG
15	51222470	51222471	362	CCAACAATGGAGAAACCCCGTCTCTACTAAAAATACAAAATTAGCCGGGCATGGGTGGTGCATGCCTGTAATCCCAGCTACTCGGGAGGCTGAGGCAGGAGAACTGCTTGAACCCGGAGGTAGAGGTTGCAGTGAGCCGGGATCGCGCCATTGCACTCCAGCCTGGGCAACAAGAGCGAAGCTCCACCCAAAAAAAAAAAAAAAAAAAAAAAAAATTTGTTCTGGGTAGAAGAGCACAGCCAAGACTAAACATTA
15	53402323	53402324	78	GACTCCATGTCTAGATCAAACATTCTCATTTTTAATGAACTCTAGAAGGAAAGCAAAGAAAACACTCCAGGCTTTTGTG
15	53800435	53800436	135	GCTGGGATTACAGGCATGTGCCACCACACTTGGCTAATTTTATATTTTTAGTAGAGATGGGGGTTTCACCACGTTGGCCAGGCTGGTCTCGTACTCCTGACCTCAGGTGATCCACCTGCTTTGGCCTCCCAAAGTG
15	54165939	54165940	320	AACTCTTTTTCTAGCAGATGACTTGCATTTCTGACATTTGTTCTGATCTCCATCACCCATGTGCGGAGTGAATGGGAAAGTTGTGATGGGGTGATGGTTGTAGCATAGGGGAGATGGCTTAGTCACCTCTCAAAAGACTTTTAAGAGGTATCGGATCTGCCAAGAATTTTCAGAATGCACTATTGTCAGCTGCTGGTCATTAGCTTTAAGTTCTAGTCTCTATTTAGGGAAAACAGAAAAAGTCTGAGTAAGTGT
15	54188215	54188216	349	GCATTTTATTTTATTTTATTTTATTTTATTTTATTTTTTTTTTTTTTTTTTTTTTTTTTTTTTGAGACGGAGTCTCGCTCTGTCGCCCAGGCTGGAGTGCAGTGGCGCGATCTCGGCTCACTGCAAGCTCCGCCTCCCGGGTTCACGCCATTCTCCTGCCTCAGCCTCCCGAGTAGCTGGGACTACAGGCGCCCGCTACCACGCCCGGCTAATTTTTTGTATTTTTAGTAGAGACGGGGTTTCACCGTGTTAGCC
15	54895084	54895085	101	CTGTGTTCATCCTCAATCAGAAAAATCCAGGCTGTCAGAGAATCTACAATTGAAAAATGCTTGCTCTTAAAAAGATAATAAAGTACAGAAGGGATTTGTAAA
15	55502089	55502090	200	ATACGTATATACACACATATGTGTGTATATACGTATATATACACATATGTGTGTATATCCGTATATACACACATGTGTGTATATATACGTATATACACACATATGTGTGTATATATACGTATATACACACATATGTGTGTATACGTATATATACACACATATGTGTGTATACGTATATATACACACATATGTGTGTATACG
[truncated: 3,213 more rows]

## Sheet: CHM1.smallINDEL
Chr	Start	End	Type	Size	Reference	Alternative
[truncated: 24,527 more rows]

[truncated: 3 more sheets: NA12878.largeDEL, NA12878.largeINS, NA12878.smallINDEL]
