# Supplementary material for: HySA: a Hybrid Structural variant Assembly approach using next-generation and single-molecule sequencing technologies
Source: HighWire-hosted journal article supplement (doi:10.1101/gr.214767.116), 2017-01-19
Supplement: Supplemental_Table_S2.xlsx [file Supplemental_Table_S2.xlsx]

## Sheet: Sheet1
Supplemental Table S2: Large DEL validation using fosmid data
largeDEL	HySA	DELLY	PBHoney	Custom	svclassify
Validated by formid	8	13	2	1	2
Total calls in fosmid region	57	164	87	100	49
Proportion validated	0.140351	0.0792683	0.0229885	0.01	0.0408163
