# Supplementary material for: HySA: a Hybrid Structural variant Assembly approach using next-generation and single-molecule sequencing technologies
Source: HighWire-hosted journal article supplement (doi:10.1101/gr.214767.116), 2017-01-19
Supplement: Supplemental_Table_S3.xlsx [file Supplemental_Table_S3.xlsx]

## Sheet: Sheet1
Supplemental Table S3: Small DEL validation using fosmid data
smallDEL	HySA	Platinum	GIAB
Validated by formid	83	57	73
Total calls in fosmid region	127	95	110
Proportion validated	0.653543	0.6	0.663636
