# Supplementary material for: HySA: a Hybrid Structural variant Assembly approach using next-generation and single-molecule sequencing technologies
Source: HighWire-hosted journal article supplement (doi:10.1101/gr.214767.116), 2017-01-19
Supplement: Supplemental_Table_S4.xlsx [file Supplemental_Table_S4.xlsx]

## Sheet: Sheet1
Supplemental Table S4: Small INS validation using fosmid data
smallINS	HySA	Platinum	GIAB
Validated by formid	91	57	85
Total calls in fosmid region	139	74	112
Proportion validated	0.654676	0.77027	0.758929
