# Supplementary material for: HySA: a Hybrid Structural variant Assembly approach using next-generation and single-molecule sequencing technologies
Source: HighWire-hosted journal article supplement (doi:10.1101/gr.214767.116), 2017-01-19
Supplement: Supplemental_Table_S5.xlsx [file Supplemental_Table_S5.xlsx]

## Sheet: Complex_DEL (DEL+ INS_w_origin)
chromsome	start	end	size	inserted sequence	spacer/dup1_location	spacer/dup1_type	spacer/dup1_ori	spacer/dup2_location	spacer/dup2_type	spacer/dup2_ori
chr3	162807956	162829872	21916	TTTCAATCTCTTTGTTAAATTTATCTATTAGGATTCTGAATTTATTCTGGGTGTTCTCCTGAATTGTATTGAGCTCCCTCAAAAGAGCGATTTTGAGTTCTGTCTGAAACGTCACACATCTCTGTTTCTCCAGGATAGGTCCTTGGTGGCTTTCTTAGTTCATTTGATGAGATCACGGTTTCCTGGATGGTCTTTTATGCATGTGGATTTTCATTGTGGTGTCTGGGCATTAAAGGGTTAGCTGTTTATTGTAGTCTTTACAGTATCAGTTTGTTTGTACCTGTCCTTCTTGGAAAGGCTTTCCAGGTATTCAAAGGAGCTTGAGTGTTTTGTTCTAAGCCTTTGGTCACTGCAATTATGAAGATTTTAGAGGCATTCCTAGCCCAGTGACACTGTGGC…	chr3:162827576-162829857	spacer	inverted
chr4	49146077	49146534	457	CACCAAGGTTGAGTGCATGCTATTCCAATCCATTCCATTCCTTTCCACTCCATTCAATTCCATTCCTTCCAGTTCGGTTGATTCCGTTCCATTGAATTCCGTTTCTGTTCCATCCAGTTCCATTCCATTCCTTTCCATTCCATTTCATTCCATTGCATTCCACTCGGATTGATACCATTCCATTCCATTGCATTCCAGTTGCATTCCATTCCATTCCACTCCATTCCTTTCGGGTTATTCCTTTCATTCGATTCCATTCCATACCATTCCACTCCATTCCGTTCCTATTCCATTCGGTTGATTCCGTTCCATTCCATGCCTTTTATTCCATTCCATTCCATTCCTATTCCATTCCAGTTCCATTCCATTCTATTCCA	chr4:49146173-49146621	spacer	inverted
chr4	186172335	186177089	4754	CGGCCGGGCGCGGGTGGCTCACGCCTGTAATCCCAGCACTTTGGGAGGCCAAGGCGGGCAGATCACGAGGTCAGGAGATCGAGGACCATCCCGGCTAAAACGCGTGAAACCCGTCTCTACTAAAAATACAAAAAATTAGCCGGGGGTGGTGGCGGGCGCCTGTAGTCCCAGCTACTTGGGAGGCTGAGGCAGGAGAATGGGCGTGAACCCGGGAGGCGGAGCTTGCAGTGAGCCGAGATCGCGCCACTGCACTCCAGCCTGGGCGACAGAGCGAGACTCCGTCTAAAAAAAAAAAAA	chr4:186173581-186173644	spacer	inverted
chr2	94753409	94753898	489	AAAAAAGAGAACAGAGATCCCACTTGATGCTTGCCAATAACCCTGCAAGACAAAGTAAAAACCCACACAAACACACTACACACACAAAAACTCACACATACACTCTCACGCATACATACAACACACAAAACTCACACATACACACGCATGC	chr2:94753462-94753522	spacer	normal
chr1	16939993	16943401	3408	ACCGTGCGTGGCGCCGTCGTCTTGTCCCGCAGAGCACTGGCCAACATGGCGAAACCCCATCTCTACTAAAAATTTAAAAAATTGCCCAGGCACAGTGGCTAACGCCTGTAATCCCAGCACTTTGGGAGGCCGAGGCGTGCAGATCACTTGAGGTCAGGAATTTGAGACCAGCCTGGCCAACATGGTGAAACCCCACTTCTAAAATAAAATGCAAAAATTAGCTGGGCGTGTGATAGGCGCTTGTAATCCCAGCTACTTCGGGAGGCTGAGGCAGGAGAATCGCTTGAACTCTGGAGGTGGAGATTGCAGCAAGCTGTGTGGAGTGCAGTGAGATTGTGTCACTGCACTCCAGCCTAGGCAAGAGTGAGACTGTGTGTAAAAACAAAAAATTGCTGGACG…	chr1:16942914-16943191	spacer	normal	chr1:16943119-16943551	spacer	normal
chr7	156155660	156155699	39	ACAAGTGGGACGTCACAGGTGTGGACG	chr7:156155590-156155660	spacer	inverted
chrUn_KI270442v1	19325	22296	2971	AGTGCGATTGGATTGGACTGGATTGGAGTGGAATTCAGTGGAGGGAATGGAGTGGTATGGAATGGAATGCAAATGGAATGGAATGGAATGGACTCGATTTGAATGGATTGGAATGGAAAGGAATGGAATGGACTCGAATGGAATGAGAATGTACTCGAATGGAATGGAATGGAAAGGAATGGAATGGAATTGGAATGGCGAATGGAATGCAATAGAATCGAATGGAATGGAATGGAAATGAATGGAGTGGAATCCAATGGAATGGAATACAAAGGAATTAATCTAATTGCAAGGAATGTGCTGAAGTGGAGTTCAGTGGAACTCAATGCAGTGAATTGAATGGTTAGTAATGGACTTGAGTGTAGTGGAGTGGAATGGAAATGAATGGAATGGAATGGA…	chrUn_KI270442v1:22300-22431	duplication	normal
chr15	28350884	28351220	336	TCTCCTGCTCCCCATCTTCTCTCCTGCTTCCTCTTCTCCTCCTGCTCTTCTCTATCTCCTCCTGCTCCGTATCTTCTCCTCCTGCTCCCGTATCTTCTCCTCCTGCTCCCTATCTTCTCCTCCTGCTCTCCACATCTTCCTCCTGCTCCTGCTCTCTTTCTCCTCTCTCTTCTCTCCTCCTGCTCACACCTTCTCCTCCTGCTCCGATCTTCTCCTCCTGCTCCACATCTTCCTCCTCCTGCCTCTCCTCTCATTCTCTCTTCTCTCTCTCCTCTGCTCTCCTCTGCATCTT	chr15:28350794-28350868	duplication	normal
chrUn_KN707896v1_decoy	6191	6470	279	CATTGCAATCGAGGTTGATTCCATTCGAGTTGAATACATTCCATTTCCATTCAATTCCATTCCATTCCATCACCGGATTCATTCCATTCCATTCCATTTAAATTCCATTCCATTCCATTTCATTCCATTCCATTCTATTCCGTACCATTCCATTCCATCCCATTCCATTCCATTCCATTCCATTCCATGCATTACACTCGGGTTGATTCCATTCCTTTCCATTCCATTCTTGTTGAATCCATTCTA	chrUn_KN707896v1_decoy:6468-6539	spacer	normal
chr8	57382462	57382737	275	ATAATATACATATATTATAATATATAATTAGTATATTATAATATAATGTAATATTATTATATTATAATGTAATATATAATGTAATAATATAATATATTATATATATTATATAATAATATATTATATAATAATATATATATAATAATATATAATATAATGTATTATATATTATATAATAATATATTATGTAATAAT	chr8:57382541-57382579	spacer	normal
chr6	66782693	66782834	141	TCAATGATATATATATATTTCTAATGATATGATATCTAGATCATT	chr6:66782601-66782693	spacer	inverted
chrUn_KI270757v1	60793	61470	677	AATGTCCACATCACAAAGAAGTTTCTCAGAATGCTTCTGTGTGATTTTTATGGGATGATATTTCCTTTTCCAACATGAGCCACAAAGGGCTCCAAATGTCCACTTGCAGATTCTACATAAAGGGAATATCAAAACTGCTCAATAAAAGAAAGGTTCAACTCTGTGAGATGAATGCACACATAACAGAGAAGTTTCTGAGAATGCATCCTGTGTATTTTTATGGGAAGATATCTCCTTTTCCACCATCGGCTACTTATGGCTCAAAGTATCCACTTTGAGATTCTATGAAAAGAGTGTTTCAAAACATTTCAATCTAATGCAATATTCAAAAC	chrUn_KI270757v1:60291-60462	duplication	normal
chr20	29362331	29368735	6404	ATCAGTCTTCTATTCAGTGACTTCTTCATGGGTATGGTGTTTCATTTTAGGATGATAAAGAAGTTGTAGATATGGATAAATTAGATAAATTAGACGGTTGGACAACACTGAATATACTGGATGCCACAGAACTATACATTTAAACATGGTTAAAATTGTAAGTTTTATGTTATATATATATTTTACCACCAAAAGAGGGCCAGGCTTAGATGTTTATATGTTAGGGGTTTGGAGTACCTCTAACATTTGTTCCCCTCCAGGAGAATAATTTATAAACACCCACACAAGAAAAGTAGATACTGACTTCACAAATCTCCTTACAAGTCCCACAGCAGGGCTGTCTGGGAATGCTGAGGTGGAAAAAGTCACATAAACTTGAGGTCAATGTGAGACCTCCCA…	chr20:29367791-29368241	spacer	normal	chr20:29366072-29366677	spacer	inverted
chr16	46387987	46388932	945	ATTCATACGGAATGATAATCGAATGGAATTCAAAGGAATCATCATCGAAGGGAATCGAATGCAACAATCGAATGGAATCTAATGAATCATCATCGAATGGAATCGACCAGAATCATCGAATGGAATAGAAGAGAATCATCATTGAATGGAATTGAATGGAATCGTCAATGAATGGAATCGAATGGAATAATCAGAGAATGGATTCATACGGAATCATCATCGAATGGAATTGAATGGAATCATCTTCGAATGGAATTGAATGGAATCATCTCAAATGGAATTCAAATGAATCATCGAATGTACTCGAATGAGTCATCATCGAATGGAATTGAATGGATTCATCGAATGGACATGAATGGAATCACCATTGAATGGAATCGAACGGAATGATCGTTTGGA…	chr16:46388397-46388444	spacer	normal	chr16:46388368-46388426	spacer	normal
chr2	91809041	91809618	577	CTCGCCGCGCGCGGCTTTTTGCTCGACCCGGCTTTTTGCCCCCCCACCGCCGCGGCTTTTTCACCCCACTGCCGTGGCTTTTTGCCGCCGCGGCTTTTTGCCCGCTGCGGCTTTTTGCCCCCCCGACCGCCGCGCGGCTTTTTCACCCCCGCCGCGGTGGCTTTTTGCCGCGGCGGCTTTTTGCCCCCTGACGCGCGTGGCCTTTTCCCCGCCGCCTCGGGTTTATGCCCGCCGCGGCTTTTTGCCCCCCTGCCGCCGCGGTTCCCCGCCCTCAACCGCCCTCGCGGCTTTTTGCCCGCCCCGGCTTTTCGCTCCTCCGCCGACGCGGCTTTTTGACCCCTGCCTCCGGTGCCGCGGTTATTTGCCCGCCGCGGCTTTTTGCCCCCCCCGCCGACGCGG…	chr2:91809577-91809674	spacer	normal
chr17	26962502	26963236	734	TTCCCACGCCGCGCGGCTTTTCCTCCGGCTTTTTGCTCGCCGAGCAGCTTTCTCCTACCGCGCGGCTTTTTGCCCCCTGCCATCGCGGCTTTTGTCCCTCCGCGGCGGCTTTTTGCCCTGCCGCCACGGCTTTTGCCGCGACGCCTGCTTTTTACCCCCACCTCTGCTGCTTTTTGCCCCCGCCGCGCGGGTTTTTTCCCCCAGCCGCCGCGGCTTTTTGTCCGCGCCGCCACCGAGGCTTTTTGTCCCGCGCCGCCGCGGCTTTTGCGTCTTTTTGCCCCCCGCCTCAGCGCTTTCTGCCACCCGCCGCGGCTTTTTGCCCCGCCGCTGCACCTTTTTCCCCCGCCGCGTCTTTTTGCCCCCGCCGCCTAGGCTTTTTGTCCCCGCCACCGCAGCTTT…	chr17:26963065-26963118	spacer	normal	chr17:26962454-26962493	duplication	normal
chr10	38941812	38942939	1127	CCGCGCAGCTTTCTCCTACCGGGTTTTTGCCCCCGCCGCGCGTGCTTTTTGCCCTGCGCCATGGCTTTTGCCGACGCAGGCTTTTTACCCCACCGCCCGCTGCTTTTTTGCCCCGCCGCAACGGCCTGTCGGGTTTTTTGCCCCTGCCTCGCGGCTTTTGCCCTCCCCGCGACCTCTTGGCCCCTGCCGCCCACAGGCTTCTGGCCACGCGGCTTCTCCGCCCCCCGCACGGCTTTTCCCTCAGGCCGCGGCTTTCTTGCCGCCGCCGCCGCGCGGTTTTTTGCCCCTGCCGCCGCTGCTTTTTGCCCGCGCCAGCCAGCAGATGCTTTGTTCCGCGCCTCGCGCGGCTTTTAGCAGCTTTTTGCCCTCGCCGCCGCCTCGTCTCTTTCACCGCACCTC…	chr10:38941831-38941867	spacer	normal
chrUn_KN707963v1_decoy	57530	57788	258	TACAACTCTTCTGTATGCTCTGCCTACAAGGGGCATTGTGACATATCTCTGCACTGATCACCCAGGTGATGTAACAATTTTTGGATTTGTCTACCAGGGCTTTGTGACTTATGTTTGCACTGATCACCCAGGAGATGTAACTCTTGTTTTGGCTCTGACTACAGGGTTACTTTGACGTGTCACTGCACT	chrUn_KN707963v1_decoy:57462-57535	spacer	normal
chr9	86539644	86541039	1395	TTATTGTGGGCCATGCCTTTTGATCATATATTAGCTAGCAAGAGCTCCAGGTTTCCTCTCCATAATGAAAATTTTTGAGCCTAACAATAGTCACAATTGGCGC	chr9:86540931-86541017	spacer	inverted
chr2	122718996	122724931	5935	TGCTTCCAGTACCTCTGTAAAAGCCAAAGCTGTAATAAGCTCAGGCTTTCTGGTTTTACTCCTTCACTTCTTAAAGGTTTTAGGCTCTGATATTACTTCCTCAGAGAGGCCTTCTGTCAATAGCTCATTTAAAATACTTCCCACTACATCATCATTTTTCTGTACGCAGGTTTCCCTTCATAGCACTTATCACTGAGTATATATATATATATATATAATATATATATATACTCAATATATGTATACACACATATATATATAATTGAGATAAATTTGTAAGTAACTTTAAACATGTACTCTATTAGACTCTATATTCCTACACTTCCTCTTATTCACTAAAGACTAAACTCTCTGAATTTCTTGAATGTGAATCACCTTATTCAGCACCATGTCTTTCAT…	chr2:122719027-122719798	spacer	inverted	chr2:122719806-122719855	spacer	normal
chr1	181074255	181074954	699	CTGTCGAAAGAAACAACAGAACGAAAGAAAGAAGAAAGAAAGAAAGAAAGAAAGAAAGAAAGAAAGAAAGAAAGAAGAAGAAAGAAAGAAAACTTATAATCATGGCGGAAGGTGAAGGGGAAGCAGGCATGTCTTACATGGCTAGAGAAGGAGGAAGAAAGAGCAGAGGGAGGAGCTACACACTTTTAAACAACCAGATCTTTTTTCTTTTGAGACAGAGTCTGGCTCTGTCGCCCAGGCTGGAGTGCAGTGAA	chr1:181074769-181074940	spacer	inverted
chr3	70365957	70366543	586	TTGCTGCTTTTTACTCTTTTCTTTTTACAATCTCCTTGTCTCTGCTTCAATTCATGATCCTTGGTCAAATCTAGCTCTCTGATCACTTTATTATATTTTGTGATTTTTCCAAAGTGTGATGATATATTGGAATCTATGTGAGTATATAGCCTTTTTGCGTTGCTGGCTTCATTAAACTTCTATTAACTGTAATATTGGTGTATTCTTTTCCATGTATGTTTGTTTTTTGTTTTGTTTCTTATTTTTTGTGTTTTATTGTTTTTTTTTTTTGTTTTTTGGCCTTAATAGCTTATTTTTTTCTAATAGCTACTGTTATAATGAATA	chr3:70366361-70366430	spacer	normal
chr7	152785382	152785475	93	GAGAGAGAGAGAGAGAGAGGAGAGAGAGAGAGAGAGAGAGAG	chr7:152785475-152785530	spacer	inverted
chr10	29423128	29423793	665	TTGAAAAGTCACATTTCTTGCCATGCCTTCAATCAATCTCATCTGCATTTTTAGTTCAATGCAAGCACTGAATGTGCCTGGAATCTCTTTGTTTTTAGAAAAGACAAAAGTT	chr10:29423183-29423227	spacer	normal
chr1	62278317	62278464	147	TCTTTCTTTCTTTCTTTCTTTTTTTTTTTTTTTTTTTCAGATGGCATCATTCGTTCTTCTTGTTCCCAGGCTGGAGTGGCAACTGCTTGCAGCTATGCATG	chr1:62278379-62278411	spacer	normal
chr12	39466256	39466532	276	GCCATGCTGGAAAAGCAAAGGCTAAAGAACTTGCCACCAAACTGTGATTAATATATCTGTGTCTGTTGTGTTTCTGCATATGTAAAATAATTAAAATAATACAAACTCTCAAAAATATTATAATGAAAAAGCTTTATTAAATATTGGAAGAATTACCAAAACCTGACACAGAGACAGGCTTAACATT	chr12:39466326-39466499	spacer	inverted

## Sheet: All_Complex_DEL (DEL+INS)
chromsome	start	end	size	inserted sequence
chr1	102630526	102630830	304	CAGTAATAATGTTTT
chr1	103631106	103631352	246	ATTGCTTCTTTTTTTTTTTTAGATGGAGTTTACTCTTGTTGCCCAGGCTGTGGTGCAATGGCACGATCCTGGCTCACTGCAATTTCCGCTTCCCGGGTTCAAGGGATCCTGAGATGGGGTTCTCTCGTGTTTATCAGGCGTCTGGTCTCAA
chr1	103725231	103725477	246	ATTGCTTCTTTTTTTTTTTTAGATGGAGTTTACTCTTGTTGCCCAGGCTGTGGTGCAATGGCACGATCCTGGCTCACTGCAATTTCCGCTTCCCGGGTTCAAGGGATCCTGAGATGGGGTTCTCTCGTGTTTATCAGGCGTCTGGTCTCAA
chr1	108374877	108374950	73	ATATATATATATATA
chr1	109055107	109055420	313	TTGTTTTTGTTTTTTTT
chr1	111532055	111532192	137	GTTTACTCTGGCTGAGGAAGTTTCTACTCTGTCTGGCGTGGGTAGGAGCCACTGCTTCTACACACTCTCATAGTCGAGAC
chr1	115560088	115560132	44	CTACGTGTCATTACGTAG
chr1	116459536	116459677	141	AGAAAGAAGTTTGCGATGATTGTGTCTT
chr1	119851929	119852139	210	TGATATCCATTTTA
chr1	120901761	120903979	2218	TTACATATGTATACACACATAGTCGTGAGTGTATATATATATTAAAATATATATATATAATATATAATATAAATATAAATATATATAATATATATAATATATACTATATAAAATATATTATATATTATTTTATATATTACATATACACACAAATATGTGTATATGTTTATATTATATATATTATATATATATATATATATATATATATATATATATATATATAATTATATATAAATATAATAATATGTAATATATATAATATATGCTATATATATATATATATATAAAAAATTATATATTATATATAATTATATATCCTTATATATTTATATATATGTATATTTATATATAATTATATATAATTATATAATTATATATGTATATTTATCTATAATTATA…
chr1	122462720	122462902	182	TAAAAAGTAAACAGA
chr1	13203397	13203551	154	AGAAGAAAGAGAAGAAGAGAAGAAAGAAGAGGAAGGAAGAAGGAAGGAAAGGAAGAAGAAGGAAGGAAGGAAGAAGGAAGGAAGGA
chr1	143619936	143620256	320	ATATATATATATGGCGGTGCGAGGGCCACTGCACAG
chr1	143622743	143623956	1213	TCTTATTAGACATATATAAACACACATATATATACACATGCATATATATATATACATATATACATATATATACATACATATATATACATACATATATATATATATATACACACACACACTCTAAAAACCCTTTGTTGGAAATAAATATGATATCTCCTATATTGTGGTTTCTTTTTATGTTCTCTTAATGTTCCCTGTTTGGAGATAACGATAGATAATCTTCAAAAAGGTGAATATACACACCCACACACCCACCCACACACATACATACACACACACACACACACACACACACACG
chr1	143751824	143753609	1785	ACTTTATTTTTC
chr1	143916802	143917103	301	CCTTTTTGATATTTTC
chr1	144076507	144076584	77	CGCCACGGCTTTCTGTCCCGCCGCCGCGACTTTTGCCCGCCGCGGCTTTTTACCCCCGCCGCCGTG
chr1	144464683	144467929	3246	CCCTGTTAGGATTCTGTAATTTCTGTTTTCTCATCTGCAGTATATGGATTTGTTTGCTCCACACCATCCATTCTGCTGCTGAGCCTATCTGCTGGACTTTTTATTTTAGTTGCATTTTTCACTTCTAATACTTCCATTTGGTTCTTATTTATGTCTTGTATTTATTTGCTGAGTCTTTCAGGAATTAAGGGGTAGATCAAAACAGTTTCAGATTAAGAAAAGCTAAGGAATCTCTGACCAGTCAGTTCTGCCTTAAAAGAAAGATGTCCATAGAAAAAA
chr1	145570322	145570353	31	TGGACATAGCAT
chr1	147980693	147980907	214	CTATCATATTAGTAGTCCAATTCCCATCATCTCCCTCACATCCTCAAATCCATACTCATGTCACCATCTCCTCATTCCACTCCTCAGC
chr1	148358880	148359457	577	TATATATATATATATATATATATTGAGTTATATATTTTATATATATATATCACATACATATATGCTTTTGTAAAATTGAGCTTAGACTGTATTTTTATTTA
chr1	148469105	148471329	2224	CTATATCATTCCCTACATTTATATATATACAAATATATAATATATAATAATATATAATATATAATAATATATTATATATAATGTGTATAATATATAATATATAATACTATATTATATAGAGTGTATATATATATATTATATATTATATAATATATAATAAATATATAATATAATACAATATATATTATATAATATATATTTACATTCATGTAATATAAAATATATAATATATTATATATAAATATACAATTATATATAATTATAAATATAAAATTATATATAATTATAAATATGCAATTATATATATAATTATAAATATACAATTATATATAAATATACAATTATATATAAATATACAATTATGTATAAATATACAATTATGTATAAATATACAATTAT…
chr1	148857364	148857669	305	ATCTTAGCCCCTTTCTTT
chr1	151599331	151599528	197	CTCCCTCTCCTCTCCCTCTCCTCTCCCTC
chr1	157049054	157049462	408	CTCCAGGTTCCACGAGTCACACCACAT
chr1	164206886	164207089	203	AGATAATCTCATCCTGCAACTGGCTGAATTAGAGCATAAGTTGAACTCCCAGACTCAAAGAGATGAGTCTTCTTTTTGTCAGAGGAAGAAGCTTCTCCACCCCCAGTGGTA
chr1	16619299	16621186	1887	CGTCCTGCGCCACTGCAATCCAGCCTAAGCAACAGAGCAAGACTCCGTCTCAAAAAAAGAAAAAAGAAAAAAAAAA
chr1	167897545	167897665	120	AGAGAGAAGAGAAAGCATCAGGCAAAACTAAACAGAGATATGTTTGACAAAATATGACAACTCTCAAGTGTCAAGGTCATAAAAAGACAAGGAAAGA
chr1	16939993	16943401	3408	ACCGTGCGTGGCGCCGTCGTCTTGTCCCGCAGAGCACTGGCCAACATGGCGAAACCCCATCTCTACTAAAAATTTAAAAAATTGCCCAGGCACAGTGGCTAACGCCTGTAATCCCAGCACTTTGGGAGGCCGAGGCGTGCAGATCACTTGAGGTCAGGAATTTGAGACCAGCCTGGCCAACATGGTGAAACCCCACTTCTAAAATAAAATGCAAAAATTAGCTGGGCGTGTGATAGGCGCTTGTAATCCCAGCTACTTCGGGAGGCTGAGGCAGGAGAATCGCTTGAACTCTGGAGGTGGAGATTGCAGCAAGCTGTGTGGAGTGCAGTGAGATTGTGTCACTGCACTCCAGCCTAGGCAAGAGTGAGACTGTGTGTAAAAACAAAAAATTGCTGGACG…
chr1	171814443	171814511	68	CGACTCACTGCAT
chr1	180323871	180324180	309	TACTCTATGTCTTTT
chr1	181074255	181074954	699	CTGTCGAAAGAAACAACAGAACGAAAGAAAGAAGAAAGAAAGAAAGAAAGAAAGAAAGAAAGAAAGAAAGAAAGAAGAAGAAAGAAAGAAAACTTATAATCATGGCGGAAGGTGAAGGGGAAGCAGGCATGTCTTACATGGCTAGAGAAGGAGGAAGAAAGAGCAGAGGGAGGAGCTACACACTTTTAAACAACCAGATCTTTTTTCTTTTGAGACAGAGTCTGGCTCTGTCGCCCAGGCTGGAGTGCAGTGAA
chr1	194481988	194485184	3196	TATCATATTATACATATTATATATCA
chr1	197924833	197925256	423	ACTAGTAACTCATATATACTGGATTTCATCTCATAAGACAGGATACATATTAAAAGACAGTTTTTAAGATGTAGTTACACTATAATAGATCAGATACACAGCTAAAATAGCTGCTCATAGCTGATTTTAAATCAGCAAATAATAGATATATAGACATGAGATTTTCATAGGAGTGTATTTAGTGGACAGCCATTTCATTAAACTCTATTAATCTAAATTAACTTTTAC
chr1	206359749	206360107	358	TATATAAAATGAACAGGCAAGAGGATGGGTACAAGGATATTGCTATAGAGACGGAGTCGCTTGTCCAGCTGAGTCATGGATTGCACTGCAGTGCTCGGGTCACGATTCTGCACTCAGTACTGACTCAGGCGGACTAGCCGGCTAATTTTGATTAGAGAGACGGCACTTTAGCAGGATGGTCGATCTCTGACTGTATCGCTGTAAAGTGTGATACAGGCTGAAGGG
chr1	207119019	207119852	833	GGAATTCATTCCAGTTTACAATGGTGGGCTTTACTCGCTCATCTTTGCAGGTTCCACGTTTGTCCTTGAAGCACTCAGTTCATGTCTATCTAACACG
chr1	212468682	212468788	106	TACACTCTGGCCTGAATTTCAGTGTGTCTTAC
chr1	225574621	225574925	304	ATATATAAAAAAAA
chr1	227836407	227836706	299	AATAAAAGCTTCC
chr1	228174096	228174514	418	GTGCTGCCTGTGGGCTTGGCGTGCTCTGTGGCGTGCTGCGCTGTGGCGTGGCTCGTGTGGCGTGCGCTGTGGGCGTGCTGCTGTGGCGTGGCGCTGTGGCGTGGCTCGCTGTGGCGTCGCTGTGGGCGTGCTCGCTGTCGTGCTGCGTGGGCGTGCTCGCTGTGGCGTGCTGCGCTGGGCGTGCTCGC
chr1	232639780	232640250	470	CCACAGTTGACACGAGTCTGTCTGTGCAGCTATCATGCGATCTCGTCACTTAGCTCCTTACGCATTCTCTGTAGCTGAATAGTGGATACATGCCGCTCGCTATTGTATTAGTAGACTGTTATAGCCATGTCTGACTGACCTATTGTATTATACCTGAGCCAGATTTTATGCTTGCAAATAATATGTCATGTATGTTATTGCTACTGCATTTATATACTGTATTATGTGAATATATGTGGCCTATTTATGTGTA
chr1	233729451	233729730	279	AACAGGGCTGGCGGGGCGCGGTGGCTCACGCTTGTAATCCCAGCACTTT
chr1	233826467	233827834	1367	GGAAGTCAGTGTGGGCGATTCTCAGG
chr1	235135095	235135337	242	GATGCAGAGATTGCAGTGCAGATCTCGGCTCACTGCCAACCTCCACTCTCCCGGCTCATCAAGCGATACTCTCGCGC
chr1	242644803	242644880	77	TACACTTTGTTTTTGTTTTTTTTTTTT
chr1	246864593	246864888	295	AAAGACTAGACTGAC
chr1	247687175	247693207	6032	AAAAAAATGAAAAGAAAGATC
chr1	247795752	247795810	58	ATGTGGGCTACTGCTG
chr1	27608885	27608988	103	GTGTGTGTGTGTGTGTTGTGTGTGTGTGT
chr1	28901210	28901356	146	GCTGGGATTACAGGC
chr1	36267651	36267941	290	AAAAATTAAAAAACTAACTCGGCTGGGCGCGGTGGCTCATACCTGTAATCCAGCACTTTCAG
chr1	37350874	37351123	249	CAGAACCCCTGG
chr1	43391700	43392116	416	TCTATTAGGCACGCTAGATTAGCAGATATCGTAGCTACAACACGCACCATACACTCGTCTCATGAGAAATCTCTAAAAGCGAAGCCACTATGCTGTAGTAGATATAATAAATATATTGCTGACTATTGCACATAGCCACAACAATGTA
chr1	46860114	46861411	1297	TCTATGAATGAATAAGTATTTCTGCCTCTTTAGA
chr1	59582966	59583991	1025	GGATCCAAAGGAGCTATAAGGGTGCT
chr1	62278317	62278464	147	TCTTTCTTTCTTTCTTTCTTTTTTTTTTTTTTTTTTTCAGATGGCATCATTCGTTCTTCTTGTTCCCAGGCTGGAGTGGCAACTGCTTGCAGCTATGCATG
chr1	65798242	65798561	319	GCCAGGCTAGTCTT
chr1	67899	68349	450	GCTCCCTCCCTTCCAAT
chr1	68764959	68765079	120	ATATATATATATATAT
chr1	7510013	7511470	1457	ATCCTGCACATGCTTATG
chr1	78935843	78936246	403	GTATACTAGTACACTACATGATCAACATGTATTCTTATATACATGTATTTATCACTACTGACTAGCAGAATGCTACAAGTAGTGACATGCATGATCGACAAATGTCAAGTAGATATTCTGTATGTACATAATCAAATGTTATAGACATGTTATGTATATGACATATCAATGCATGATATT
chr1	79648442	79648865	423	CTACTAACTACTTATACGACTGCAATACAGTACTAGTTTAAGTCTAGTAGCTATCGGCACTGCAGACTACGAGTGCGAACTACTAAAGGATTTTAGTTGCTTTCTTTTTGAGGCTTACGTATCTGAAATACACTAGCATAAAGATACTTGACTTAGAAATATATT
chr1	80939089	80945265	6176	AAAGTCTCACTTCTT
chr1	82576939	82577285	346	TATTATCTATGTACTTTATTATATTTTTTTTTTTTTTTTTGACTGTCTCGATTGTCAGCTATGCATATATTCACTATCTTCGTTACCATCTTCCTTATATTACTTACTAATCTATAGCTAATTTTGTATTTTGCTGAACGTTCATTACGTGTCTATCTTGATGTATCTGCCTCTCTCAAAGTATGTGATTACAGCTTAATCCTCGCTGCCA
chr1	85940124	85940437	313	AAAAAGTGCCATAAG
chr1	87434262	87434304	42	GTAGAATACCTCT
chr1	91448556	91448995	439	TTAAAAAAAAATGTTC
chr10	106237450	106237566	116	TTATATTGCAGATTTGTTGCAG
chr10	10666583	10666988	405	GCGCTGGCTAGTGTATAGCACTTTGAGCACGTACAGGTCAGAGATCGGAATTTGGCTACACGTGGTCTCTACACATTAGCGCGTGTAGCGCGCTTAGTCAGTATCAGTGCGATTGGACCAGCATCATGAGCGATCATGCATCATGCACAGACGACTCAAAAGTTACTAGCATCAGCGTTTTACACATCACACACTATGCAC
chr10	112398045	112398366	321	ACAGATCCACTTTTCTT
chr10	123619427	123619501	74	CAAACAGACAGAATGCTAGA
chr10	12691368	12691407	39	TATATATATATATATAT
chr10	128209283	128209346	63	AGAGAAGGACGTTATATAATG
chr10	131190423	131192947	2524	AGCTACTCTCCCAACCTTCTCCCTCGACCCCCTAACAAGC
chr10	132117611	132117640	29	GGGCGGGCGTGGGCGAGGG
chr10	19215730	19215857	127	ATAAATTAGTAT
chr10	23346567	23346744	177	AGATTTGGTGCGGTCATGCCTGTCATCCCAACACTTGTTGTGAGGCGGAGAGCGATCAATGGAGCAGCAG
chr10	29423128	29423793	665	TTGAAAAGTCACATTTCTTGCCATGCCTTCAATCAATCTCATCTGCATTTTTAGTTCAATGCAAGCACTGAATGTGCCTGGAATCTCTTTGTTTTTAGAAAAGACAAAAGTT
chr10	35742887	35742941	54	TTCTTTCTTTCTTTCTTTTCTTTCTTT
chr10	37179041	37179095	54	TTTTGTTGATAT
chr10	38732925	38732992	67	ATATATATATATATATACA
chr10	38871239	38871288	49	GAATGGAATGGAATGGA
chr10	38876361	38876886	525	GTAATGGAATGGAATGGAATGCAATGGAATGGAATGGAATGGAATGCAATAGAATGGAGTGGACAAAACTGTAATGGACTCGAATGGAATGGATTTCAGATAGAAGGGACTCGAAAGGAATGTCTCAAATGGAATTTAGTCGAATAGAATGGAATCAGAATGGAATGAAATAGTATGGAATGGAATCGAATGGAATGCAATCAAACGGAGTTGACTGCAATAGAACGGAATCGAATGCAATGGATTGAAAGGTAATTGATTCAAATG
chr10	38941812	38942939	1127	CCGCGCAGCTTTCTCCTACCGGGTTTTTGCCCCCGCCGCGCGTGCTTTTTGCCCTGCGCCATGGCTTTTGCCGACGCAGGCTTTTTACCCCACCGCCCGCTGCTTTTTTGCCCCGCCGCAACGGCCTGTCGGGTTTTTTGCCCCTGCCTCGCGGCTTTTGCCCTCCCCGCGACCTCTTGGCCCCTGCCGCCCACAGGCTTCTGGCCACGCGGCTTCTCCGCCCCCCGCACGGCTTTTCCCTCAGGCCGCGGCTTTCTTGCCGCCGCCGCCGCGCGGTTTTTTGCCCCTGCCGCCGCTGCTTTTTGCCCGCGCCAGCCAGCAGATGCTTTGTTCCGCGCCTCGCGCGGCTTTTAGCAGCTTTTTGCCCTCGCCGCCGCCTCGTCTCTTTCACCGCACCTC…
chr10	38942126	38942634	508	CCGCGCGGGTTTTTTCCCCCAGCCGCGCGCTTTTTGCCCCCGCCACCGAGGCTTTTTGCCCGCGCCGCCGCGGCTTTTGCGTCTTTTTGCCCCCGCCTCAGCCGCTTTC
chr10	41886817	41886954	137	GAATTCAACGGAATGGAAACAACCCGAGTGAAATGGCATGGAATGGAAAGGACTTGAATGTAATGGAAAGGATTGGAATCAAACCGATTAGAAAGCAATTGCA
chr10	41906764	41906887	123	TAAACACCAGTGGAATG
chr10	41908549	41908750	201	GGAATGGAATGGAATGGAATGAATGGAATGGAA
chr10	42071727	42072145	418	TTAGTAGAATCAACATCTTAATGGAT
chr10	42074528	42074588	60	ATCATCGAATGG
chr10	42075479	42075524	45	ATCATCGAATGGACTCGAATGTAATCA
chr10	42075644	42075715	71	ATATGATTGAACGGAAATCGAATGGAATCCATCATCAGATGGAACGAATT
chr10	42075870	42076248	378	AATGGACTCAAATGGAA
chr10	42077686	42078064	378	AATGGACTCAAATGGAA
chr10	42079111	42079156	45	ATCATCGAATGTACTCGAATGTAATCA
chr10	42079390	42079880	490	AATCTAATGATATCATCATCCAATGGAAACAAGTAGAATCAATATCTA
chr10	42080937	42080982	45	ATCATCGAATGTACTCGAATGTAATCA
chr10	42081295	42081713	418	TTAGTAGAATCAACATCTTAATGGAT
chr10	42082112	42082330	218	CTAATGAAAATCCTTGAACTGAATTGAATGGAATCGTCATTCGAATGAATTGAATGCAATCATCGAATGGTTTGGAATGGAATCATCTTCAAATGGAAAGAATGGAATCATCGCATAGAATCGGAATGGAATTA
chr10	42082112	42082330	218	CTAATGAAATCCTTGAACTGAATTGAATGGAATCGTCATCGAAATGAATTGAATGCAATCATCGAATGGTTTGGGATGGAATCATCTTCAATTGAAAGGAATGGAATCATCGCATAGAATCGAATGGAATTA
chr10	42082248	42082332	84	CGCATAGAAATCGAATGGAATTATAC
chr10	42082753	42082798	45	ATCATCGAATGTACTCGAATGTAATCA
chr10	42083035	42083543	508	CTAATGATATCATCATCCAATGGAAACAAGTAGAATCAATATCTAATGGACTCAAAAGGAATTATCCTCAAAGGATTCGAATGGAATTTCGAATGCA
chr10	42093538	42093649	111	CCAATGGAATGCAATGGATTAATCCATGGACTCGAATTCAATCACCATCGAATACAATCGAATGGAGTCATCGAATCGACTCAAATG
chr10	42095956	42096001	45	ATCATCGAATGGCCACGAATGGAATCA
chr10	42095956	42096001	45	ATCATCGAATGGCCACGAATGGAATCA
chr10	44179773	44179898	125	ATAAGTTATAGTGTAATCAATGTGATGGTATAGGGGGAACGAACAGATAG
chr10	45784243	45784321	78	ATATATATATAT
chr10	46184946	46191695	6749	TTTTTTTTTTTTTTGTGAGCATGGGGCCGTATTTTAATACAAGAAAGACATTGCTCTAGAACATGGCTCGCCTTTGCTTCAGGGCCTAGCAGTTTATTTTAGCCATAAGGGTAAGGGAGCAGGTCAGAAATGACTTTTAGTGTAATCCTATCTGTAATTAAAAATACAAATGCTGTCATAAGATCAAATGTTATCAAAAATCAGTATTTAAAATTAAATTTACCCCCAAATTTCTTTCAAAAAAATTTGTAATGTTCTTTTTCAGTGAAGCCTTTGCACTGCTAGAGCTGAAGAATGTGATCAATCGGCTTGTTGAATAATCCCGCACAGTAGGTATTCCGCTGAAGCCAACTCTAGCTGGGGGCTCGAGAGCGAAAGACACAGATGGGGCCCTGCCGC…
chr10	46771471	46771817	346	TATTTCTTAAATATGGGTATAAGTGTCTAAGTGAAGACATTATATAAATATGGTATAAGTATATAAGT
chr10	47733178	47733277	99	TTTCTTTCTTTTCTTTCTTTCTTT
chr10	47743273	47743380	107	TGTTTGTTGTTGTGTT
chr10	4935218	4939402	4184	CATGCTGGGCATGTTGGCTCACGCCTGTAATCCCAGCACTTTGGGAAGCTGAGGTCGGTGGATCACCTGAGGTCAGGAGTTCAAGACTAGCCTTTCCAATATGGTGAAACCCCATCTCTACTAAAAACAAAATACAAAAATTAGTGAAACAGGAGCATTTCTGTTATTGATTTTATAGCTGCG
chr10	49937761	49938160	399	TTCAGTTTCAGCTTCCTGAAGCAGGCGTGGACGTCGTAATTGAAGCCTAGGAGGAAAGGACGATGCAAGCAGGTAGCAAGAACCAGTATCCTTTACTGCTAATAAAACATTGTAGTCAGTTCCTTCTGTAGGGGCATGAGAGAAAGACGTAGCGTTCTATACTTGCTCTCTTGACACTTTAT
chr10	50148796	50148899	103	GTGAGATTATGTCTCCAAAAAGTTTCTTAAAAAAGCAAAACAAGTAAAAAAAAAAAAAAAATATATATATATTATATATATATATCGA
chr10	51818728	51819041	313	AAAAGAATACCAGAGG
chr10	55766912	55767014	102	TTTTTATCAGTCAATATAGAGTTTTTAAACA
chr10	64783221	64783428	207	CTATTTTCCCCCAGACCACAAGGGTCCCTGGATGATGAGTTGGATTTAGTTGGCCCTTACACACAGCATCATGAAAACTAGCTTTCTTTCCTTAGACCACCAAGGAGGATGAAGAAAAGTTTGA
chr10	65272630	65273045	415	AGAACACAGAAAGACCTAAACTC
chr10	69238370	69238680	310	ACCAGGTATTTTC
chr10	69555218	69555311	93	TATATATATATATAT
chr10	7751869	7752077	208	AAAAGTAACGATG
chr10	79807589	79807757	168	TTTTTATCAGTCAATATAGAGTTTTTAAACAGATGAGTAGAAATTCTCTCTGAAGATAATAAAAGAAAAAGTATGTCATCATAATATATGTATATAATAATAAATAATA
chr10	79812035	79813009	974	ACATGCTGGAGAGAAGGAGTGTCTGAGTCCTAGACCCTCTCCCATCCCAGTACTTGTAAATGTCACCTTATTTTGAAATAGGAGCTTTACAGATATAATAAAGTTAAAGATCTCAGGGTGAGATCATCCTGAATTAAGATTGAGTCATGGATATGAATATATGCATAATATATATATATATATGCATGCATGTGGAGGCAGGTTGTATATAATATAATATGTATATATATTACATATGTATATGTGTGTGTGTGTGTATATATATATATGTGTGTGTGTGTGTGTGTGTATGTGTGTGTGTATTATATACACC
chr10	79936090	79936259	169	GATGATCGCCCCGC
chr10	87325596	87325928	332	TTCCTAGGTATGTAAATGAAAGTG
chr10	88962929	88962956	27	ATATATATATATATA
chr10	89787644	89787965	321	ATGAGTAAGTTCTTT
chr10	92374844	92377898	3054	AGTTGACTTATCTTTTA
chr10	93785722	93786749	1027	ACCACCACATGGCACACAAAAGGGTGGGCCACACACAC
chr10_KI270824v1_alt	73840	75529	1689	TAGCTGCCCCAGCTTTTTGCCCCCTGCCTGCCGCGCGGCTTTTTGCCCCCCAACCGCCAAGGCTTTTTACCCGCCGCCGGCTTTCCGTCCCCCCGCCGCCGCGCATTTTGCCGCCCGCTGCCGCGCTTTTTGCCCCCACCGCCGCAGCTTTTTCCCCTCCACCCTGCCTCAGCTTTTTTGCCCGCAGCGGCTTTGTGCCCCCGCTGGCGCCAGGGGTTTTGCCCGCCGCGGCTTTTTGACCCCTCGGCGCTGCGAATTTTGTTGCCGCGGCTTTTTGCTCGCCCTGGTTTTTTGCCCCCCAGTCGCCGTGGGTTTTTTGCCCCGCCGCGGCGTTTTATGCCCCATCGTCGCGGCTTTTTGCCCTCCGACGCCGCGGCTTTTTTGCCCCCCACCGCCGCG…
chr11	101546055	101546373	318	TTATAACTCTTT
chr11	102880396	102882074	1678	TAATCCCAGCACTTTGGGAG
chr11	104139664	104140244	580	CTGACATAGATTCCTAGATCAATAAAGAGAAAACTGCTTCATCTTAGAAACGCAGCGACTTATACACTGCGAGCAGTGACATGATCAGAGACAACCATTGGGTTCTTCGTCATGTCTTAAAAAATAAAAAATAACTTGTCGTCGTGCTGAGCTGTATCAGTACACTGAGCAAGAGAAAGCTACCCAGATATAGTGAGAACACTATTCCGCACAGGCAACTGCTCAAATTAAATCCTAATTAAAATATCTTGTCGACTAACGAGAAAAACAAAGAATACAGTATAGGATATCAGCATCAAATATTATAATGATTCCAAATTAGCAATTTATGCATTAGCATTTA
chr11	12922178	12922485	307	TTGTGAGGTCAGTACGGATTCTCTTTATTGTGATGACACG
chr11	133140870	133141052	182	CACGACGACGACGAAGGAGAAGGAGAGAGGAGAGAGAGAGGAAGGAGAAGGAGAAGGAGAAGGA
chr11	133630339	133630668	329	AAGCATGGTCAGAATTCTTACACAAGAGCCAGGACCGCACCCCTGTAGCCTTTCTCTGTGCCAAAACAACTTGACCTTACTGTTTTAGCCTAGCCCTCATGTCTGCTGATGCAGCGCGCTGCACTGCTTT
chr11	13544372	13544897	525	AAGATGGGATTACAGAGTGCCTGCCACATCATGCATGGCTAATTTTTAGTATTTTTTAGTAGAAGATGAGGTTTTGCCATGTTGTTGCCAGCAGCCGTCTCCAAGATCTCAAACAGTCATCAGGCTCTAATCAGTGGATATCCTCCCATCTTGGCCTCTCCAAAAAATGCTAGTGGGATTGTGTAGGCCAGTGCAGCTCAGTAACCACCATGCCCATGCTGCATGACACATGCT
chr11	16974393	16975047	654	CGCAGATACTTGAAACTGCAATATGAACTTCACAATTGCGTTCATCCTTGCGCAGGCAGAATTTGCAGATGTGTAATCGCCAGCTTCTCAGGAAATTTATTTGCAGTGGCATGTCAACATACTGTTTAGCACGCAGCGGCCATGATTCATAATTTTTTTTACATATCATTTATGTTTCATATAGATGAATTCATGATAGCTTGTATCTCCGAGTCAATGCTCCTATGCAGATTCCCTACTGCAGTGCTAGATACTTAGACATGTTATTTGTATTTACTAAATCGTTAGTTGCCACGCACTCTGTTCCGATAAACTACAGAAAAATCTGACCTTTGATGGTCACTACTATGTTAACTTAAAGCATACAGTACCTCACATGAGAGTTTCAC
chr11	18268811	18268879	68	GCGCAGAGCAGATCTGTCTAAGATATATG
chr11	19954928	19954976	48	TGTGTGTGTATATA
chr11	21767543	21767587	44	AAGAATGCCTGTCATTC
chr11	21932737	21932791	54	TATAACATAAATCCAGC
chr11	21988880	21989000	120	GCTATGGACTCAACCTCCTATGTCGACTATGCATGACTACCCTACATCATTTGTCGGATAGTATTCTGCAGCTTCTACATATTC
chr11	25410936	25411246	310	CTATGAGCAATATATAGAGCTACAATATATTTGTAGTATTAAATTCATTTTGAACCATGTACATTATTAGAAGACATGAAAATTATAATTAAGTATTATTCAAGTGATCATGCAAATAAACATCCGAAATTTGTTCATGCTGACATGC
chr11	25413680	25413865	185	AGATATTATATGTATATATATATAGGCTGGTCTATATATACTCCTGTCCTCAAAACGATCTCCTGTTCTATTGCGTCAGCATGTTAACGTCATTTTTGAATGGTCATAATTATGTATATTAATTCATAATTTGATATAATCAATTA
chr11	28985657	28991343	5686	AGTCATTGGTAGCTTGATGGGGATGGCATTGAATCTATAAATTACCTTGGCAGTATGGCCATTTTCACAAATATTGATTCTTCCTACCCATGAG
chr11	33516054	33516473	419	CAGAACCTTCCTGCCAATCAGACTGTGCTAGAATTCTCATACAGCTAGCACACTACAGGCAGCTGAGTCATTGCTTTATTTTTTGAGCTTCCAGTACCCGTGATCCAGTGCCAATCTCGGCAGCACTCGCTGCTTACGAATTCTCTCATCAGCAGTCTACTAGGCACGCCACTACGCGAATCATTGTAGAGACGGTTCATGTAGCAGATGTGATTCTGATCGTGATGCCGCTGAATGCTGATCAGCTAGACGCCTGATTCTGAGATGG
chr11	3572560	3572611	51	TTAGAGAAGCTAGTA
chr11	37427243	37427351	108	TATTAATAATGCATGACACATTTAATAAAATA
chr11	37771671	37771841	170	ATGTATGTAAGCTAAAAGGAACTAGCCTTTATGCTGTGGTGTAAAATGTT
chr11	38989190	38989273	83	TTTCTTTTTTTTTTTTTTTCACATGTCTCTTCTGCTCCTTA
chr11	42294443	42294486	43	CATCTCTTATCT
chr11	4283040	4283204	164	GAAGTGAGGAGCCGTCACTTCCTGAAGGAAAGCACTGCCAGTACTCGTCTGGAACTGAGAAGG
chr11	45111123	45111413	290	CTAATCTAAGCACTATCTATACATTTGACATCTTACTACAGGAGATAGTTATCTTGATTAATCATCCCATTCATTCCGCCACCTCTCCTTTGACTCCTACTGTGATGGAATGATAGAGATTTATTACTTTTTCTTAACCTTGCTTCGGCCACGAACCCTTGGCACGGCTG
chr11	48506488	48506532	44	TTCCCCCTTCCCTTCTCCCTTCCCTTC
chr11	49003957	49004355	398	CTGGCTAATTTTTGTAT
chr11	49403547	49403865	318	AAAGAAAGAATGGTGAA
chr11	49406737	49406860	123	TATATATATCTCTGGTCTTGTCTTTAT
chr11	49614728	49614943	215	ATAGGCCATGATCTT
chr11	49690322	49690415	93	AACACATACACATAGGTACAAATCCCTAAATAAAA
chr11	49830567	49830677	110	GCTTCATGGTTGGAACTATGGTTCC
chr11	49831400	49831455	55	TATTTTATACGTTAAAA
chr11	50337136	50337236	100	TCACACCACTGCACTCCAACCTAGGCAACAAGTGAGACTCCGTCTCAAAAAAAAAAAAAAGGGGGGGCGGGGGGAAAA
chr11	50790267	50790503	236	TATGACATGAATGCACGCACCACAAAGAACTTTCCCAGAATATTTATGTGTAGTTTTTATGTGAAGACATTTCCTTTTCCACAATAGGCCACAAAGCTTTGCAAACATTACACTGCAGATTCTGCAAAAAGAAAGATTCAAAAATCCTCAA
chr11	55131936	55132065	129	TTCTTTTGATTGAGCAGTTTGGAAAC
chr11	58195373	58195685	312	CTTCTTGTATACTTT
chr11	58453153	58453463	310	AAAAGTGTAGTATTTTT
chr11	66460087	66460441	354	CGAGACCCTGGCTCAAAAAAAAAAATTTTTTGAGCCAGGGG
chr11	67965674	67965767	93	TATACATTACAACTGAATATAAACACATAATATTATATATATATATGTATATTAT
chr11	6860136	6860735	599	TTTTTTTTTTTTTTTTTTTTTTTTGAGACAGAGTCTCGCTCTGTCGCCCAGGCCGGACTGCGGACTGCAGTGGCGCAATCTCGGCT
chr11	71085854	71085978	124	AATATAATATATATTATATAACATAATATATTGTTATATATTAT
chr11	71085854	71085978	124	AATATAATATATATTATATAACATAATATATTGTTATATATTAT
chr11	71561456	71563395	1939	CATACTTTTTTTTTCCAAGGCCGATATCATGAAGGAAATTTCCTAACTTTTTCTTCTAGGATTTTTTTTTTTTTTTGAGACAGAGCCTCGCTCTGTCGCCCAGGCTGGAGTGCTGTGGCACGATCTCTATGGGGTGTGTATCCAAAGGAAAAGAAATCAGTGTGTTGAAGAGATATCTGCACCCTATGTTTATTGCCAGCACTGCTCACAATAGCATTGATATGAAAGCACCTAAGTGCTTGTCAACAGATGAATGGAAAAGTAATGGAAAAGAAAAGATGGTGTATAGACCCGATGGAATTCTATTTAACCCTAAAACAGACCAAAATTCTGGCCATATTGTGACAATACAGGTGAGCTTGGAAGACATTATGTTTAATGAAATAAGCCAGGCACAGA…
chr11	71677873	71678036	163	GCAGCAACCATCCAAGATGCCTAATATCAATCAATTATTTATGATAAAGAAAATGTGTT
chr11	71830795	71832276	1481	AAAAATACTTGACCA
chr11	76734291	76734410	119	CACCTGTAATCCCAGC
chr11	77920121	77920341	220	TATTACTCACATA
chr11	89623342	89623438	96	TGTGTTCGCATGC
chr11	89727033	89727085	52	CCTTTATGAGCCATTTGTCTTGGTCTTATAAACCATGAGCT
chr11	90271146	90271226	80	AGGAAGGAAGGAAGGAAGGAAGGA
chr11	92512754	92513137	383	ATCAGTCAACAGTGACTTCTGCAATGTCATTTAACACACTAAAGTATGACATTATACATTGTTAAGATTTCGTTAGTTATCAACTGACACTAATCAGTAGTCAATTGTACACGTGACTACTAAATCAAATGCTGACGGCCTAACTACTAGCTGAAAGATCTAGCGTTATGACAGATGCATCATCAGTACAGCTAGATCGTCTCA
chr11	99405609	99405933	324	AGAATTCTGAATTCCT
chr12	119919697	119920013	316	CAGACGTGAGAGGGAGACGTGAGAGGGAGGGAGACGAGAGGGAGGAGAGCGAGAGAGCAGAGGGCAGAGGGAGGAGGGAGGGCAGGGCAGGGAGGGAGGGGAGGAGGGAGGGGCAGGGCAGAGGGAGAGGGGCAGGGGAGGGGCAGAGGGCAGAGGCAGAGAGGGAAGCAGAGGAAGAGTTTCTTA
chr12	121851692	121852024	332	TATTCATTTATTT
chr12	122525822	122526293	471	TATTTAACGAATGCTGTAACAAGGCTGGAGTGCAGTGACATACGGCACTCAACTCCGCTCGTTAAGCATTTGCCTCAGCTCAAGTGCTGACTCCTCGCACTACCGCTATCTATAATATAAAGAGTTTACACGTAGCGGATGGTCTGCATCTCTGACTCGGATCCATCGGCTCAAATGCGGATACAGCTACCACGCGCCGCACGAAGGTTAATTTAAAGAACAGGTAGTGACAAGACTATCAAGCTCTCACTTCAAATGTTACATTGGCCATCGCCTCAGCGAATTGTACTTCCACTTTTCAGTTGAATTCACCTTCAT
chr12	127018094	127018309	215	AAGAACCCAGCTG
chr12	127553378	127553766	388	AATGTGCACTTCTTCCATTATTAAAACTGAATAGCTCAATTATCTTCTGTTCTTCTTTTTTTTGAGACTGTCTACTCGCAGTGGACTGCAGTCTATCGTATCAATCCTCGTCATGCCATTCTCTCTCATCCTATGATTAACACACAGACTAATGATATAGCTTCATGTAGCCAATTCTATTACTCGTTCGCTCGTTGCTTTCACTTACTTCTTCTTTTT
chr12	129638482	129638622	140	ATATATGCTGCA
chr12	14105688	14106000	312	AAAGAAATAAAGGGCATCC
chr12	21894534	21894646	112	AAGAATGTTTCTTAC
chr12	24307517	24307767	250	AGGAAGGAAGGAAGGAAGAAGGAAGGA
chr12	27136307	27136440	133	TTACACATTGCATGCCTGTATCAAAACATATACCCCATAAATGTATATTCCTACTATGTAGCCACACAAAGTAGAAAAGAAAATATCTAACATATAGGAGA
chr12	27143720	27143843	123	AGTTTGTGAGCAAATTGGTCCTTTAAAAAAGTAGCACTAAAAATAAAAGTGGCAGTAGAAAAGGTGGCAGAATTGTGTTGTGTCATCATAT
chr12	27144530	27144851	321	TAAATGAAAGATGCTTTCGTTCTTAAGGAGGTTACA
chr12	27281072	27281388	316	GCTTTAGCTTTGTTT
chr12	37255277	37257056	1779	TCCGAGTTTTAAATACGAAGATATTTCCTTTCTATAACCTTGGCCTCCAATCGCTTGAAAACTCAACTGAAATCCTACAAAAAGATTGTAACATTGGCCTCAAAGGGCTTGAATCTCCACCTGCAAAATTCCACAAAATGAGTGTTTCAAAATCGCTTCGTCTAAAAGGAAAAGTTCAAGTCTGTGAGTTGAATATACACACACACAAAGA
chr12	37333224	37334769	1545	AGAGAGCAGTTTCGAAACAGTGTTTTTATAGTATCTGCAAGAGGATATGTGGAACGTTTTGAGGCTTATGATGGAAAGGAAATATCTTCACATAAATACTAGATAGAAGCATTCTCACCAACTGCTTTGTGGTGTACGCATTCATCTGACAGAGGCGGAACACTTCTTTTTGATAGAGCAGTTTTGAAACACACCTTTTTGTAGAATCTGCAAGTGTTCAGTTAGAGCACTTTGAGGCCTATGGTGGAAAAGGAAATAT
chr12	37429649	37430413	764	ACACTATACATATATATGATATATTTCATATATATGATATATATTATACATCATATATTTATATATGATGTATAATATATATCATTTATATTTATATAATGATATTATTATATATGCATTTATATTTATATATGATATATATTAATATATATCACTTAATATTTATATATATGATATATATATTTATGTATCATTATATTTATTTATATGATATATATTATTATATTTGTATTTATTTATATGATATATATATCATATATATATTTTTATATATAGTA
chr12	39466256	39466532	276	GCCATGCTGGAAAAGCAAAGGCTAAAGAACTTGCCACCAAACTGTGATTAATATATCTGTGTCTGTTGTGTTTCTGCATATGTAAAATAATTAAAATAATACAAACTCTCAAAAATATTATAATGAAAAAGCTTTATTAAATATTGGAAGAATTACCAAAACCTGACACAGAGACAGGCTTAACATT
chr12	44470794	44470873	79	TGATATACCAGCACAAAGAGCAAAGTCAC
chr12	60908480	60908641	161	TATATATATATAT
chr12	66057613	66057665	52	TTTTTTTTTTTTTTTTTTT
chr12	71208565	71210695	2130	GTATATATTGGTTTT
chr12	72899799	72899969	170	AGCAGGATGTTTGCTTCATACATTTCACTGTTTTAACATATATACTTCTTTTACTAAATTGTCCTGAAGTGTTCTTTCATTTGTATCATATATATCTTTGTTAATTCTGTCTATTAATTT
chr12	7816084	7816405	321	ATTTCTTGAATTTTTA
chr12	8209614	8210029	415	ACAACATAAGCAAATGACAACATGTAAAGCATAAATTTGACCATCCCTGACAATGTACAAAAGGACTGCATCCACATTCTTCACATTGTCCATGGTCTACTTTCCACTCCTTCTCCACCA
chr12	83449947	83450957	1010	ACACTTAGAAACATCCAGAATTTGACACATCTCTTAGCATGTCCACCAATGAATGTTATGACCACAATGTATCTGGGTACATCATGTGTCCAGTCATATATGACAAGTAGCTCAAAGATACATATCATTTACTCAATATACATATGCTTACTTGGGATATTCATGATACATAAGTACATAAAATCATATGTCATATGACGAGCTGAGGCTTTAGATTGCTATTCTACATTAGAATATTACTCGATTGATCAATCTTAACATCTGTCATGTGTCTATGACATCTATATCTTTGGGTATATCATTGGAATGCGGATTGCGACACGATCACATAAAGCAGATACATACAAATATAGTCTGATTAGCTGTCATTCATCATGGCCGGCAGTCTATAGAGTGCTA…
chr12	83565412	83565755	343	AGAAATAGAATAGGATACATAAGATTGTATGCGGTGTAGCGATAGCATTTGAAGCGATCACAGTGAGATGAATGTAAGTGAACGTTTAAAATACAAAAATTACGTGTAGCGGCTGAGTCCAGCTATGGGAGTGAGGCAGAGAAGCTGAACGGAGCATGCAGTGAGCGAGGACTGCATCACTACACATGTTCA
chr12	87909267	87909684	417	GGCGGTGGCAGCAGACTGATGGCCCTGAACAGTGTAGGGCCTAGCGCTCTAGAAACAGTAAGGTCCCAAGCTCTGACTTAGGTGTAATGAAAGGGTTGGGGGTCGAGGTTGTGCCAGTCTCTAGTGTCTAAGGAATTGTGGAAAGCATTTAACTATGCCTTAGGTTTGGAAGAGAGTTTTTGTTTTGTAAAAAGGGTATTAAGGGTTTGGGAGATTTAGTCGGAACATTGATCAGCAGGGGAGAGCACGTGTGTTTTTCATG
chr12	90093230	90097919	4689	TATATTAATATTAATATATATTATATATTTAATATATATATATTATTTATATATAATATATTATATATATATTTAATATACATAAATATA
chr12	9462973	9463260	287	ATATTATTATTTATTTATTATTATTATTTTT
chr12	96664702	96664817	115	TCTATCTATCTATCTATCTATCTATCTATCTATCTATCTATCTATCTATCT
chr12	97160965	97161279	314	GAGCTTGGTGTTTT
chr13	102161567	102161694	127	TTAGTCATAGTACCCAAGAAGA
chr13	104508872	104509174	302	AAAAGATCTTGG
chr13	18608076	18608908	832	CAAGTTCTGCAGATGTTA
chr13	18902674	18902960	286	TACAGTCAACTCTTTT
chr13	19029100	19029202	102	CCACCTCGACCTCCCAAAGTGCTGGATTATAGGCATGAGCCAC
chr13	19194158	19194425	267	ATGTGCACACCACAACGCCCAGCTAATTTTTTGTATTTTTTTACTAGAGATGGATTGGTTTCCCTCCCTGTGTTGTGCCCAGGGCTGGTTCTCGAACCTCCTGAGACCTCATGATCTGCCGCCTCAGCCTACC
chr13	19367546	19367874	328	TAGAGACAAATT
chr13	19467873	19468355	482	CATGTCTATGAGTTCAACTGTTAACCCTTTTAGAGCCCACAAATAAGTGAGAACATGTGGTGTTTGTCTTTCCGTGCCTGGCTTATTTCAGTTAACGTAGTGATCTCCAGTTCCATCTATGTTGTTGGCAAAAGGCAGGATCTCATTCAT
chr13	21219384	21219503	119	TCTCTTTCTCTTTCTCTCTTCTCTCTTTCTCTTTCTTCTCTCTCTTTCTCTCTTTCTTTCT
chr13	21300803	21301257	454	TATATTATATTGTATTTACATACATGATGACTCTCATTTAAATCTTTGCGGCGCACTACTCTAGGTTCTGTATGAGAGAGTGACAGCTGAATTTTTGAACCCATCCACACATTGTTGTTGTTGTTTTTTCCGGATAATAATTAAAAATTGAAGGAAAATTATGTTCTGAAAACTATTTGTTAGTGTTAATTATGATGTTATGATCATGGTGATATGTG
chr13	23058298	23063165	4867	TTGCGCCACTGCAGTCCGCAGTCCGGCCTGGGCGACAGAGCGAGACTCCGTCTCAACAAAAAAAAAAAAAAAAAA
chr13	24439718	24440028	310	GCATCGAATTCCACTGCATCTCTCTGTTCTCAAGGACAATAGTAAGCTCGATTCTTAATTGTATATCAGAATTTTTTTACCCAAAACAATGAACTTCCTACTCCTCCTGACTCCCCAACTACTCTGTTT
chr13	28265653	28266044	391	TCTAATGTTCATCTGTTTTCTTACAGAGTCAAAATATCAGTTGTTTTGTTTATAGGGTTTTTTTTTTGACATCTCTCTGTCGAGTGGATGCATCATGCTTGCTATAACTCGCTTGGGTACATCTGCTCAGTCAATATATACAGCCCCTTATCAGTATGTTTTTTTGTTATTTAGTAGAGAGGTTTTCCTTTTTACAGGATGTCATCGACCTCATGATCACGCCTGTCAAGTTGTGATTAAATAGTACGCGCGGT
chr13	30469440	30469689	249	CACTTAAGAGGCGCAAGAACTCTGATATTTTT
chr13	35122209	35122725	516	TGTTTGTTTAAA
chr13	36232652	36232726	74	AAGAATACAAAAAAAGA
chr13	39454329	39454730	401	TCTTAAGTCGTTCTCACCTGTAATCCGAGCTTGGAGCGAGCGCGGATCACGAGTCAGGAGATCGAGACCATCCGGCTAAACGGTGAAACGTCTTACTAAAAATACAAAGGTAGTCGTGAGTATTTGGACTGAGGTTGGCTACGAGGATTAGTGATCCGATGTAGCTGAAATCTCCAAATGTTCAAGTGCCTTAAGCTGTTTGGTACTTAGTCTTTTGTATTTCAT
chr13	39826794	39826841	47	ATTTATTACAGAGACA
chr13	63057632	63057735	103	TTGGTTGCACACTCATAATTGTTTTGCCTTAAACTTATT
chr13	63838701	63839272	571	ACCGCCCTCAGATCCATCCAGCGGTCACCTCCATGAGGACTGGAGCACCCCTCTCGCGCTTGCTCTAAGCATCAGGTTGGGAGGCACCACCTGGAGGGAGAGAGCTCTCCGCTGTCTTAGGACCCATCGCAAGAAAGAAAGACTCAGAAATCTCCTGCTTAGACGACCGTGCGGGGGGGCACCTCGATAATTGAGGATTTGACTATACGACCATCGGTCGAGTACCACGCCGCCGACGGGATCAGAAAGCAAAGCAAGCAGTATTATTTGCAATACTACCAGAGCCTACAGCCGGTCGAAAGCAGGCGCATTGCAATTACGAGTCTAGGGGCGAGGAGTGAGGAATTCTTGGGCTGTGAGT
chr13	80104169	80104552	383	TCTATTATCTATCTAACTTCTTCACTACATCATACTAATTTTTCACGCATTTTTATCAGTGACAAAACTTATTATAAGGTACGGAAGATTCTGATTCTGATCATGATCTTCCTCCAATCTGTTCTCACGCGCATTTCTTAAGTGAAACTAAAGGAGAATCAAATCCAT
chr13	83698930	83698980	50	TATTTTTTTTTGGTTTT
chr13	86026520	86026559	39	CATCATATATATATATAT
chr13	88420867	88421288	421	GAGATAGATAAAATTTTCACACACAATAAAATTGAGATGAAGGGTCACAAAACAATCAGTCTATTAAATGTTCATAAGAATCAAAGTAATTAAAATTTGTGATCACAGGGTAGAATAGAATGACACTAACTTTATTAAAAATAAATTTCATAAGAACT
chr13	91459403	91459578	175	TTTGCAGTGGAGGTGGACAAGATTGTGGTCAGCATTGTATATATCTCTTATGAGTCCTTAGTGGTGGCCCGG
chr13	93676119	93676182	63	ATATATATATATA
chr13	98971438	98971592	154	GCGGGTGCGGCGGCTGTGCACGCCTGTAGTCGC
chr13	99026028	99026099	71	AACAGTTCCCTAGGGC
chr14	100378679	100378995	316	AAGAATGTTCCAGGCAG
chr14	104481731	104482915	1184	CGCGGGGAGGCGCC
chr14	105075127	105075326	199	ACTGGCCTCTTGCGCCCTGCGGCTCCCATCCTTCGCCAGCCCCGAGCTCCCGCCTCTCGCCTGCCCGTCCAGCCTCCCCACCGACCTCCTCCGAGTCCCCAGCCCTCCCAGCCCTGCCCGAGCCCAGCCCTCCAC
chr14	18656062	18662491	6429	GATGGGTGTGTGTGGGTGAGTGCAGGTGTGTCTGGGTGTGTGGGTGAGTGCAGGTGTGTCTGGGAGTGTGGGGGTGTGTGCGGGTGTGTCTGGTGTCTGGGTGTAGGTGGGTATGGGTGTGTACGGGTGTGTGTGTGTCTGTGTGTAAGTGGGTGAGTATGGGTGTGTGTGGGGATGTGTGTGTGTGTGTGTAGGTGGGTGAGTATGGGTGTGCGGGTGTGTGTGTGTATGTGTTTACATTGCGGTATGTGTCTCTTGGGTGCCGCCATTAGGGATTTGGAAGAATGAGGACCATAAACTTGTAAACATTTCTACATGCCTGCTACACAAGAAGTGTACCAAGCATGGTCAAAAGTAACTAAACCAAGTAAAGAAATTAGACATTAATTAAACTTAATG…
chr14	19240133	19240507	374	CTTCCCCTCATGGGTCTTCTG
chr14	19241127	19241311	184	CTCTCCTCGGCGTGGTGT
chr14	19432403	19432509	106	TCTGCATATCATATAAGTATATAAGCATATGTTG
chr14	19962527	19964349	1822	AAAATACATAAATAT
chr14	19965479	19965808	329	AAAAATTTTAATACTTTT
chr14	21067987	21068300	313	GGCTCCCCTTTTT
chr14	22636226	22640005	3779	CAAGATACCATTTTATACCCACTATATTGTCAAGAAGCAAAAATATGACAATAACAAGTGTTGACGAGGATGTGGAGACTTA
chr14	22703925	22704172	247	AGTGTTTAACTTATTGCAATTTATTACCAAGATATTTGCTATTGCTGAAAACAAAGGTAAAGTCATATCTGTAAGTGAACAAATATTAAATAAG
chr14	25677911	25678253	342	GAATTTAAGGTTTAT
chr14	28068053	28068120	67	TTTCTTTCTTTCTTTCTTTCTTT
chr14	30517303	30517562	259	GGTGCGCAACAGGATGTGATATGTGACAAGAGAAAATATGACTGATCATGGCATGCATAGGAT
chr14	37300399	37302024	1625	ATTTTTTTTTTTCTATACATTTAGTCTTAACTTTATTGAAATAGCCTTTTAGTCTATAGCTATGTTAAATTTATTTCAAAAACTACCAAAAAGAAAGATGTATAAGTTCTTTTTTTTTTTTTTTTTTTTCTTTCTTTTTTTTTTTTTATTATACTCTAAGTTTTAGGGTACATGTGCACATTGTGCAGGTTAGTTACATATGTATACATGTGCCATGCTGGTGCACTGCACCCACTAATGTGTCATCTAGCATTAGGTATATCTCCCAATGCTATCCCTCCCCCCTCCCCCCGACCCCACCACAGTCCCAGAGTGTGATATTCCCCTTCCTGTGTCCATGTGATCTCATTGTTCAATTCCCACCTATGAGTGAGAATATGCGGTGTTTGGTTTTTTGTT…
chr14	45418963	45419266	303	AGATTTCAATATTTT
chr14	54323707	54323804	97	TGTGTGTATATATATAATATATATTATATATATT
chr14	70223353	70223525	172	GAAATTCAGGGACCCA
chr14	73538959	73539027	68	ACTCTTATCTTAAAAAAAAAAAAAAAAATTCAGGTAGTTTCAATTTTTTA
chr14	81210018	81210060	42	CTACTGACAATTCGG
chr14	81308818	81308922	104	ACATACATACAT
chr14	82032768	82036988	4220	TAACATAAATCA
chr14	83169511	83170141	630	TCCAAAGACCTTTATTT
chr14	83434068	83434139	71	TATATATACATATATATAT
chr14	84672770	84673379	609	TACTATCTAAAACTAAGAATCTTTCCAAAGTATATGAATAATTGATTACTATATGTTCTTATTTTCAAGATACTTTAAGTCATATGAATCATACAGCACAACTTTGATATGATTAATTGAATCATCATCTCATCCCTGACCAATGAAGACGTGATTCATAATATAAGCATATATATCTGAAAAGATTGTCATCGAATCAGTATCTCCATTTCTGCAAGCATTCGAATCACATCTCTGCACTATACAATAAAGTCTCTGACAGTATAGACTTGTAGATATAGTCTTAGCTCATCAGTCAAAGTAGATAAATACAAACTAAATCAGACTGAATTTTAAAAATTTGATTTTGTCATCTCTCTGATCTTAAAAAGAGAGCAATTTACATAGATATAGACTTAT…
chr14	95125569	95125897	328	GAGGGGAGGAGGGAGGGGAGGTACAGAAGAGAGAGAGGAGAGAGAGAGAAGAGAGAGAAGAAGAGAGAAGAAGACAGAGAGAAGAGAAAGAAAGAAGAGAAAGAAGAAGAGAAAGAGGAAAGGGAAAGGAAAGGAAGAAAGGAAAGAAGA
chr14	98356281	98356422	141	TCTCCTCTCTCTTTCTTCTTATTTTTTCCTTCCTTCCTCCCTTCCCTCTCCTTCTCTTCTTCTCCTTCCCATTTTTTCCTTCCT
chr14_GL000194v1_random	165382	165696	314	AAGAAAATTAGTG
chr14_GL000225v1_random	138000	138469	469	ATCACCTAAGTGATGTAACACTTGTGTAGGCTCTGCCTACAGGGGCATTTTGATATACCTCTGCACTGTTAACTGAGGTGATGTAACTCTTGTCTACGCTGTGCCTACAGAGTGATTGAGACATATCTCTGCGGTGATCACGAGGTGATCCAACTCTTGCCTGATCTCTGCCTACAGGGACATTGTGACATATATCTGCACTGACCTCCAAGGTGTCTGTAAATTTAGTCTAGGCTCTGGCTACACGGCATTGTGACATATCACTGCATTGATCACCCAGGTGATATAACTCTTCTCTAGGATCTGCCTACAGGTGTGTTTGGGACATATCCCTGCAATGATCACCCAGGTGATATACCACTTGTCAAGGCTCTGCCTACAGGGGCATTGCGATGTATGT
chr14_GL000225v1_random	140469	141345	876	TATCTCTGCACTG
chr14_GL000225v1_random	43698	43778	80	CTTGCGCCACTAACTTCCCAGGGGAGTCCGTGGTGGGGCTGGGGC
chr14_GL000225v1_random	45807	45935	128	GCTGATACAAGGCTTTACATCAACTAGGTGATCAGTGCCAGTGATATGTCACAAAATACCCTGTA
chr14_GL000225v1_random	68083	68914	831	CAGAGGAAATGTAAGT
chr14_GL000225v1_random	76229	76951	722	TTTCTAGGATCTGCCTACAGGGTGCTTTGTGACATATCCCTGCAATGATCACCCAGGTGATGTACCACTTCTCAAGGCTCTGCTACAGGGACATTGCGAAGTATCTCTGCACTGATCTCCGAGGTCATGTAACTCTTGTCCACTCTCTGCCTACTAGGGGGCATTGTGAAATATCTCTGCACTGATCACCCAGGTGTTGGGACTCTTCTCTATACTCTGCCTATAGGGGAATTTGTGACATACCTCTGCACTCATCACCCACGTGATGGAAGACTTGTCTGGTCTCTGTCTATGGTGGCATTGTGTCAAATAT
chr14_GL000225v1_random	86134	86177	43	TCTGCACTGATCACCCAGGTGA
chr14_KI270845v1_alt	21728	21805	77	CCACTACCCCCGTCCTAGCTC
chr14_KI270846v1_alt	177249	177734	485	CAGCACGCTCAGTCCAGCCACAGCCCAGCTCAGCCCAGCTCAGCCCAGCCCACCCCAGGGCAGCTCAGTACAGCTCATCCCAGCAGCCCAGCCCAGCCCAGCTCAGCTC
chr15	100467854	100467892	38	ATATATATATAT
chr15	101746253	101746398	145	CGCGCGGCTCCGCTGTCAAGCCTTGGGCAGCTGTCAACAGGAGTCGAACATGCACGGCGCCGCGGCGCGTG
chr15	22035890	22036139	249	TTCTTCTCTTCCTTCCTTCCTTCCTTCCTTCCTTCCTTTCTTTCTTTCT
chr15	22299535	22299851	316	AAAAGGGTGATGCTT
chr15	24206103	24206405	302	AAAGAAAAATGTGGTCTTGA
chr15	24206103	24206410	307	AAAATGTGGTCTTGA
chr15	26716997	26717337	340	CAACCAACCGCTCTAACC
chr15	28289851	28289956	105	ACACCTCAGTGAGAGGA
chr15	28350884	28351220	336	TCTCCTGCTCCCCATCTTCTCTCCTGCTTCCTCTTCTCCTCCTGCTCTTCTCTATCTCCTCCTGCTCCGTATCTTCTCCTCCTGCTCCCGTATCTTCTCCTCCTGCTCCCTATCTTCTCCTCCTGCTCTCCACATCTTCCTCCTGCTCCTGCTCTCTTTCTCCTCTCTCTTCTCTCCTCCTGCTCACACCTTCTCCTCCTGCTCCGATCTTCTCCTCCTGCTCCACATCTTCCTCCTCCTGCCTCTCCTCTCATTCTCTCTTCTCTCTCTCCTCTGCTCTCCTCTGCATCTT
chr15	33908248	33908515	267	CTCCCCATTCTCTC
chr15	33908248	33908520	272	CTCCCCATTCTCTCTCACAC
chr15	34471554	34472584	1030	TTGTTTTTTTTTTTTTTTTTTTTGAGCGACGGAGTCTCGCTCTGTCGCCCAGCGCTGGAGTGCAGTGGCGGGATCTCGGCTCACTGCAAGCTCCGCCCTCCGGTTCACGCCATTCTCCTGCCTCAGCCTCCAAGTAGCTGGGACTACAGGCGCCCGCCACTACGCCCGGCTAATTTTTGTTATTTTTTAGTAGAGACGGGGTTTCACCGTTTTAGCCGGGCATGGTTCTCGATCTTCCTGACCTCGTGATTCCGCCCGCCTCGGCCTCCCAAAGTGCTGGGATTACAGGCGTGAGCCACCGCGCCCGGCCTTTAGTTTTCTTTAGAGAAATGTCATATCCAGTCCTTTACCCATTTTTATATTTTGGTCT
chr15	41725552	41725871	319	AAATAAATAAGTA
chr15	44970895	44974939	4044	CTTTCTTTTTTTTTTTTTTTTTGAGACAGAGTCTCACCCTGTCACCCAGGCTGGAGTGCAGTGGGCAATCTCGGCTCACTACAAGCTCCGCCTTCCGGGTTCACGCCATCCTCCTGCCTCAGCCTCCGAGTAGCTGGGACTACAGGCGCCTGCCACCATGCCGGCTAATTTTTTTATGTTTTTAGTAGAGATGGGGTATCACTGTGTTAGCCAGGATGGTCTCGATCTCCTGATCTTGTGATCCGCCCGCCTCAGCCTCCTAAAGTGCTGGATTACAGGTGTGAGCCACCGCGCCGGGCCACAAATCTTTCAATATGCATAATAGGCCTTATTTACTTGTTGCTATTCACAAAACTTGTTTCTTCATCTAATTGAGCTCCTATAAGCTTTTCTTCCAAA…
chr15	45061566	45061882	316	AGGAAACCTGTA
chr15	62655587	62655723	136	GTGCTTTAGCTATAACTTTAGGAATGGCT
chr15	66414167	66414347	180	TACCTAGTCTGATGACCTCTCATGCTAATACACCAGA
chr15	69240231	69240315	84	CTCTAGATATCTAGTAACTGATATATA
chr15	75299901	75299960	59	ACGATATATATAGTATTTGTATAT
chr15	75693391	75697888	4497	CAGTGAGAGGTGGCAGCCTGCTGGCAGCCCTCACAGCCCGGCGCCTCCTCGGCTTGGCGCCCACTCTGGCCGCGCTTGAGGAGCCCTTCAGCCCGCCGCTGCACTGTGGGAGCCGTTTCTGGCTGGCCAAGGCCGGAGCCGGCTCCCTCAGCTTGCCAGGAGGTGTGGAGGGAGAGGCGCGGGCGGACAGCCGGGGCTGCGCGCGGTGCTTGTGGGCCAGCGCGAGTTCCGGGTGGGCGTGGATCGCGGCGGCCCGCACATCGAGCAGCTGGCCGGCCCCGCCCGCCCCGGGCAGTGAGGGGCTTAGCACCTGGGCCAGCAGCTGCTGTGCTCGACTTCTCGCCCGGCCTTAGCTG
chr15	78632219	78632255	36	TCTTTCTTGTCTTTCTCTT
chr15	78761762	78761931	169	GTGTGTGTGGGTGGTGTGCGTGCCAGACCACAGCGCCTACGGACCAGCTGGCCAGGCCCCACACTGGGTCAGGAC
chr15	78768047	78769066	1019	GCGTGGGAGTGGGCAGTGGGGTGGGTGGGGTGGGAGTGTGGCGGGGGTGGGGGCGGGGAGTTGGCGGGGTGTGGGGGGCGTGGGCGTTGGCAGGGGATGGTGGGTGGAGTTGGTGTGGATGGCGTGTGGGCGGCCCAGGGGTAGTGGCTGTTGGCAGGGGCTGGGCTGTGGGGGTTGCAGCAGGGATGGGTGTGGGAGTTGGCAGGGGATGGGGCTGGGGAGTGGCATGGGACTGGGGGCGAGGGCTCACCTGGCAGGGACCGGGCTGCCTCTCTGCACTTCCTCTGGCGGTTGCCTCAGGCGGCCTAGTGGCATGACAGGTGCTCGTCGTCCACCGTCGTCTCCTCTGCCTCCGCTCTGAGCAGTCCACACTCTGCTTGTGCCCCCCTCTGAGGCCAT…
chr15	84091815	84092159	344	GCATGATCTCAGCTCACTGCA
chr15	98055495	98055792	297	TATATATATATATATAT
chr15_KI270727v1_random	118028	118122	94	AAGAAAAGACAAGGAAGGAAGAAGGAAGGAAGGAAGGAAGGAAGGAAGAAGA
chr15_KI270850v1_alt	395642	395938	296	AAAAATACATAGTAA
chr15_KI270905v1_alt	2932092	2932243	151	TGTGAAATCGGACGCGGCGCGGAGCTGCATGACTGAGATTGCACTATCAGCCTGCACAGCAGCTCCGTCTCAAAAAGTGAAATGCAGGCATGCTCAG
chr15_KI270905v1_alt	920613	920909	296	TGAAAGATTTTT
chr16	11589905	11591446	1541	AAAGTGCTGGGATTACAGGT
chr16	11908481	11908789	308	AAAAATACAAAAATTAG
chr16	1397423	1397579	156	GCTCCCCCCCCCCCGTGCTTCACCTGGGCAGTGACCTGGATGAGGCGTGTCAGGGACACGGGCTTGGCTCACCGTGTAGGGAGCGTGACGTGGATGAGTGGTCAG
chr16	13981726	13981886	160	AGTTGACAAGCATGCATGGCTGGCATAAGTGCGATGCGATGAATGCTTGGAAAGACATGGACAGATTGTAGATCTGAGGACTG
chr16	20767237	20767541	304	AAAAAACAGGGACCGG
chr16	21481174	21481477	303	AAAAAATTAGCCGG
chr16	2648450	2650478	2028	TTGCGTCACCGCATTCCAGCCTGGGTAAAAAAAGCGAAACTCCGTCTAAAAACAAAAAA
chr16	28466728	28466856	128	GTAACATTGTGCCAGAGGATAATGTCAACTTTTTAACTTCTCGGAAACGCAATAATGACTATGTAACCAAGGACTTCCACAA
chr16	28648184	28648312	128	TTGTGGAAGTCCTTGGTTACATAGTCATTATTGCGTTTCCGAGAAGTTAAAAAGTTGACATTATCCTCTGGCACAATGTTAC
chr16	28648185	28648253	68	GGAAGTTCCTTGGTTACA
chr16	28762301	28762369	68	GGAAGTTCCTTGGTTACA
chr16	32393788	32393888	100	GTGTGTGTGTGTGTGTGTGTGTGTGTGTGTGTGTGTGTGTGATATATATACACATATATACACATAGATACGT
chr16	32408657	32408716	59	TTCTATGCTCTATC
chr16	33952299	33958614	6315	TGTTTTTTTTTTTTTTTTTTTGAGACGTCAGTCTCGCCTCTGTCGCCCACAGCCTGGCAGTGCAGTGCGCGCATCTCGAGCTTCACCTGCAAGCTCCTGCCTCCCGGGTTCACGCCATTCTCCTGCCTCAGCCCTCCCTAGTAGCCTGGGACCTCACATGGCGCCCGCCACCACACCCAGCTAACTTTATTGTTGTAACTTTTACATAGCCCCCAGGTCACCTCACACATTCCCCAGGATCGGTCTCATCTCACTGTGACCTCGTGATCCGTCCCGCCTCAGCTCACACAAAGGTCGCTTCACACATGCTATGATACATGCGTATACATCATGGAATTGTTAATCAAGCTATTTAACATATATCCATCACCTCACAAATGTGTAATTTCTTTTTTTTTT…
chr16	46387987	46388932	945	ATTCATACGGAATGATAATCGAATGGAATTCAAAGGAATCATCATCGAAGGGAATCGAATGCAACAATCGAATGGAATCTAATGAATCATCATCGAATGGAATCGACCAGAATCATCGAATGGAATAGAAGAGAATCATCATTGAATGGAATTGAATGGAATCGTCAATGAATGGAATCGAATGGAATAATCAGAGAATGGATTCATACGGAATCATCATCGAATGGAATTGAATGGAATCATCTTCGAATGGAATTGAATGGAATCATCTCAAATGGAATTCAAATGAATCATCGAATGTACTCGAATGAGTCATCATCGAATGGAATTGAATGGATTCATCGAATGGACATGAATGGAATCACCATTGAATGGAATCGAACGGAATGATCGTTTGGA…
chr16	57292488	57294252	1764	CAATCTCCGCCTCCCG
chr16	63584656	63584811	155	ATATATATATATATATATATATA
chr16	69943418	69943446	28	CCCGCATTCCTCTTCCC
chr16	7229650	7229971	321	AAGAGAGGAAGCAAGAGAGGGGAGGAAGGGAGAAGAGGAAGGGAGAGAGAGGAAGGAGGAGGGAGAGAGAGGAAGGGGAAGGGGAAGGAAGAGAGAGAAGGAGAGAAGAAGGAAGGAAGGGAAGAGGAGAAGGAGAGAGAGGGAAGAAGAGACGAGAGGACAGCGGAAGGGAGAGGAGGAAGGGGGAGGAGAGAGAAGGGAGAGAGGGAGAGAAGGGAGGAGGAGGGAGG
chr16	7504700	7504875	175	AATGAAGTATGAAGATATAATATAATATATATATATATATTTTTTATATATATATATTATATAATGATCTAACATTGTCTTATATACTATATATAAGGATGTCTGATACTTAGAAGTACTGCCAGCATGTTCTGTGTG
chr16	76260993	76261136	143	TTCGCTTACAGATTTCTTTATTGAGTTTTCTGCAATTGATTCGTTGCTCCTCAGTCG
chr16	8016622	8016933	311	AGAACAAATAGAGA
chr16	81085876	81086214	338	AAAAACAAAAAAAAC
chr16	85748018	85748190	172	GAGAGGTCAGGAGTGTTGCAGTGATGACTGGTATTGCAGAGCTGAAACATC
chr16	87878158	87878200	42	TCACTGCAGAACTGTGCTCCCA
chr16	88206812	88207429	617	GCGGGAGGCGCGGGACGGAGGAGGAGAGGCGGAACGCGGGAGGCGAGCGCGGAACGCGGGGAGGCGAGGCCGCGGAACGGCGGGGAGGTGAGCCGCGGGACGGCG
chr16	88215194	88215337	143	CAATTATTGAATATATTATTACCATGTTCTGTAGATTATACCTTGCATTTATGTATACTACACTATGCTTTCTTCTCTATCTT
chr16	89732902	89733502	600	TGCGCCTGTCTTCAGGTAGATTCTGACCTCAGTCACCTCTCAGTGCAACCCCCCCTCTGGGATGCCTCTGATAAGACCCTTCCCTCAGCTTGGTTTGCCACAAAAAACCTGTATGCACAATGCGACGCTCAGAAACCTGACTGAATTTGCGGACCTGCTCTGTTTCGCAGAGTCCCTCTGCTTAAGAATTCGAGTGTCAAGCAACAGAAGCCTCGATAGAAGTCTCTTGAAGACACAAAAATTTGCAGAGAAGAACCCTGAGGACCTTTTCCAGAGTCTGGTAAGAAGAAGCAACGAAGAGCCAAGAAGTGTAGAATGACTCCAGAAGCCAGGCAAGCCGATGAAGACAACTTCGTTGGGGCTATCCATGCAGGCTCTCACTTGGCAGGTCGGATGAGC…
chr16_KI270728v1_random	1068987	1069269	282	TTTCATCGTTGCATTTCATCAGTTCATCTTTTTATTCCATC
chr16_KI270728v1_random	1244781	1245104	323	GACTCGACTAGACACCAGAGAGGTCAGAACCACGGGGACATGTCAGAACCACTAGGTGCTCAGAACACAGGGCTCAGACAGGTCAGGACACAGGGCATCATCAGCACGTGCTCAGACACCGGGGCAGATCAGCGACAGACGCAAGGTAGCTCAGAACACAGCGATCAGACAGGGTGTGAGCTCAGAGACACACACGAGTGCAGACAGGGT
chr16_KI270728v1_random	130475	130696	221	GCTTTTAATATTCTT
chr16_KI270728v1_random	130475	130696	221	GCTTTTAATATTCTT
chr16_KI270728v1_random	130475	130696	221	GCTTTTAATATTCTT
chr16_KI270728v1_random	1441674	1442031	357	AAAAAAAAAAAAGAATTTTTTCCACTTG
chr16_KI270728v1_random	207179	207235	56	GCGCGTGCGCGGCAGGGTGG
chr16_KI270853v1_alt	1995693	1995967	274	CACCCCCTACAGGTCCCCTACACCCCCTTTCCTTTCCTACTTCCCCTTCCCCTCCCCTCCCCTCCCTCCCCTCCCCCTCCCCCCCCTCCCCCTCAGATCGCCCCTCCCGTCCCCCTCCCTCCCCCTCCCCAACCACACCTCCAGCCTCCGGTCCCCTGGCCTCGCCTCCGCGCCCTAAGGCCTAAGAACACTCCACCTCTGTCCTGGCGCCTCAGGGCACCCTGAAAGGACTCAGTACGTGGTGATG
chr16_KI270854v1_alt	81092	81375	283	AAAGTGCTGGGATTACAGGCGTGAGCCA
chr17	1194483	1194913	430	AAAGTGCTGGAATTACAGGTGTGAG
chr17	12442363	12443891	1528	ATATTATATATTATAT
chr17	15563620	15563679	59	GGGGCGGGGCGAGCGG
chr17	15602629	15602927	298	GAGACCGAGTTT
chr17	18734175	18734474	299	AAAAAATGAATGAATGG
chr17	18887842	18888852	1010	AACTTGTTCTTTCTT
chr17	20556806	20556925	119	TCTCCCGTCTCCGTCTCCCGTCTCCCGTCTCCCTCTCCGTCTCCC
chr17	20635340	20637830	2490	TTTTTTTTTTTTTTGGGAAGGAGTCT
chr17	22148606	22148637	31	CCCATATGTTTCT
chr17	22151176	22151357	181	TACATTTAAAGCATATAA
chr17	26962502	26963236	734	TTCCCACGCCGCGCGGCTTTTCCTCCGGCTTTTTGCTCGCCGAGCAGCTTTCTCCTACCGCGCGGCTTTTTGCCCCCTGCCATCGCGGCTTTTGTCCCTCCGCGGCGGCTTTTTGCCCTGCCGCCACGGCTTTTGCCGCGACGCCTGCTTTTTACCCCCACCTCTGCTGCTTTTTGCCCCCGCCGCGCGGGTTTTTTCCCCCAGCCGCCGCGGCTTTTTGTCCGCGCCGCCACCGAGGCTTTTTGTCCCGCGCCGCCGCGGCTTTTGCGTCTTTTTGCCCCCCGCCTCAGCGCTTTCTGCCACCCGCCGCGGCTTTTTGCCCCGCCGCTGCACCTTTTTCCCCCGCCGCGTCTTTTTGCCCCCGCCGCCTAGGCTTTTTGTCCCCGCCACCGCAGCTTT…
chr17	26963391	26963597	206	GTGGCGCGGGTGATGCTCACTGAGGTGACCGAGCCCTGAGATACTGCTTGCAGGATGTAGGAATAACAGAAAAGAGCCTGAGACTGGAGAACTGTGACTTGCCACTTGAGAACGTGACTGAG
chr17	26964334	26970355	6021	TGTCCAGTCTTCCAACCAATAGCTTCCAACCAATATTATTAGACTTATGTTTCTAGCTTTCTTTTTTTTTTTTTTTTTTTTGAGACGGAGTCTCGCTCTGTCGCCCAGGCTGGAGTGCAGTGGCGGGATCTCGGCTCACTGCAAGCTCCGCCTCCCGGTTCACGCCATTCTCCTGCCTCAGCCTCCCAAGTAGCTGGGACTACAGGCGCCCGCCACTATGCGCCGGCTAATTTTTTTGTATTTTTAGTAGAGACGGGGTTTCACCGTTTTAGCCGGGATGGTCTCGATCTCCTGACCTCGTGATCTGCCCGCCTCGGCCTCCCAAAGTGCTGGATTACAGGCATGAGCCACGGCGCCCCGCCA
chr17	43975840	43976013	173	ATATATACACGTACGTGTATGTATACGTACATGTATATATACACGTACGTGTATGTATATGTACGTGTATA
chr17	54627783	54627872	89	ATAAATAAATTAGAATACTATAGCTTGAGTATATCATACCACTAAAAGATTATT
chr17	57053500	57053552	52	TATATATATATATATA
chr17	63874412	63874710	298	CACACGCGCTCCTCCACAGCTGCCTGATCTCAAGACTCTGATAGATCTCGACACAACCGAACTTGAGAGGAAGCTTTATTCTAAGAAGCAGTTGGTAAATGCAATACTGTACTCTGCATGCATGATAAAATAGTAAAGAATATTTGAGTTGT
chr17	64735011	64735578	567	GCCTCCCAAAGTGCTGG
chr17	68127822	68128126	304	GTGAGTGGGCTCTTTCTATTGTTTTTTCAAAATACTCAGGAGCCTATCTCCATCTTGTACATTTGAAAAATAGCTGTTCAGGTGAACCGTAACAATATTGATTCTGCACCTAGATTTCTCCAGTGAGCAGATAAGGCAAGATGTAACTTATGCGCTGGACTGCACATCACTCTCTGTCATTGG
chr17	68258093	68258192	99	AGGCAATGATTTATATACCCTTAGTCAGTGGTTTCTTCTGATCATTGGATTCCTTATCT
chr17	68265669	68265765	96	TAAGGAGCTAGAATTTTTTTTTTTTCAGCTTGAGAGCAATTGTGTGTGTGTGTGTGTGTGGTGTGT
chr17	68958842	68958953	111	AATATTATATATAATACATATAATATTAAAATATATATTATATTATATAAATATTATATA
chr17	79702880	79702944	64	CCCTCCTCCTCCCC
chr17	80896417	80896570	153	CACACACGCGGCCGCGCCACGGCCGCGCGCTGACACCCCCACACGGCCGCACGACACCCCGCATAGCACCCCGCACCCCACGCGCCGCGCC
chr17	81643331	81643630	299	AAAAAATTACCGGGAC
chr17	9226466	9226581	115	GAGGCGGTCTGTGGAGGGCTGCTGGCTGTCTCGTCAGGCCTCAGCCTGCCTCCACTCGCCTGTG
chr17_KI270730v1_random	88663	91309	2646	TGGAATGGAATGGAGTTGAGTGGAGTGGAGTGGAGTTGAGTGGAATGGAATGGAATGGAGTGGAATGGAGTGTAGTGGAATGGAGTTGAGTGGAATGGAATGGAATGGAGTGGAATGGAGTGAAGTGGAATGCAGTGTAATGGAATGGAGTTGAGTGGAATGGAATGGAATGGAGTGGAATGGAGTGAAGTGGAATGCAGTGTAATGGAATAGAGTTGAGTGGGAATGGAATGGAATGGAATGAAGTGGAATGGAGTGAAGTGGAATGCAGTGTAATGGAATAGAGTTGAGTGGAATGGAATGGAATGGAGTGTAATGGAATGGAGTTGAGTGGAAGGGAATGGAATGGAGTGGAAAGCAGTGTAGTGGAATGGAGTGGAGTGGGTTGTAGTGGAGTGG…
chr17_KI270857v1_alt	1022504	1022809	305	AAAGAAGTACACTT
chr18	12093701	12093808	107	GAGCGGGGACTGGAGTCGGGGAGGCGGTGCGCCACAGTGCGCCCGCGAATGGAGGGCGAGGGCGGGTGCCTGTCCTCCACCGGTGGCTGTG
chr18	14258305	14258385	80	CTCTCCATTCCTGTCAATCAATCTTGT
chr18	14284286	14284440	154	TAGGGGGTGTGGGGAGGGTTGGGAGATTATGGAAGGCGTGGGGAGGGTAGGGGGGATTGTGGTGGGTGGGGTGAAAGCCAGGGGTGGGGGGATGCTTCCTATCAATAG
chr18	14422235	14422278	43	GCGATTAAGTCTATCACT
chr18	14640839	14640995	156	ACCACACCATCTTCCCAAAAAACCTTTTCCCTCTTATTTCTCCCCAAAGCCCTTCTCCCCATTTCCATGCTGTCTCGCCATCCTCGCGCCACTTTTTCCAA
chr18	14822958	14823307	349	ACGTGCTTGGTTTT
chr18	15213037	15216035	2998	AGAACTGGAAATTGTC
chr18	15261166	15261445	279	AATTTAAAAAGTTTT
chr18	15267719	15267866	147	TTATAAAATAAAATTATTTATATAAATAATAAGAGAGTTGTCTTGACTTACAATGTAT
chr18	15342745	15343009	264	AGGTAGGCTTTCATAGAATGATAATGATTTAAGGCTTTGAGAACCTCTGAGAAACTAGAAACTCTACTGTAACTATATATTAATGATGGCTGACTACAAACTAGTATATAGCCGAGAG
chr18	20582606	20582761	155	AGTTTCTGAGAATGCTTCGGTCTAGCTTTTATACGAAGATATTCATGTTTCCAATGAAATCCTTAAAGTT
chr18	20591600	20591887	287	TCCTCAAAGCTATCCAAATATCCTCTTGCAGATTTTACAAAAAGATGTGTTTCAAAAACTGCTCTATCAAAACAAAGGTTCAAACTGTCAGTTGAGGGCACACATCACAAATAAATTTCT
chr18	25312532	25312842	310	AGAAGTTGGAACCA
chr18	31968923	31968963	40	AGTAAGTGGCAGA
chr18	47274309	47274353	44	TTAGTCACTGCCGCGT
chr18	53086210	53086558	348	CTTCTTCTTCTTCTTCTTTTCTTCTTCTTCTTCTTCTTCTTCTTTTCTTCTT
chr18	54426584	54430591	4007	ATGAAGATTAAAGAGTTA
chr18	64718549	64718848	299	AAAATTGATTATTTT
chr18	65782025	65782138	113	TCTCTCTTCTCTCTCTTCT
chr18	73605919	73606485	566	AACAAAATCAAAATCTCATAGCAGAAGAATGTCATCCAAATAATGTCAGAGATGATACTTCCCACATAAAGAATGTGGAGAACATGAAGTAAATTGACTCCTCTACATGTAGGTGCACAATGTCATGCTCATATGCCGATCTTTGAAAGGTGCAACAAAAGAAGATTATAATCTTTTGTGGAGGAGTAACCTCTTCGTAGCTGGAGAGAGACTTGACGCAACACCATCCGTCAGCTCTGCAGTGTCTCAGTAGGTCACGCACCTACACACAGTCTAAAATTTATCAGAAATGGTAGTGCCTATCTCTCTGTGATTGGACTGTAAAGTACGAACAATGACG
chr18	78442139	78443342	1203	AAAAGATTGATCAAGG
chr18_KI270863v1_alt	63131	63219	88	TTAGACCAAACAGATCCACACAAACTACAG
chr19	1528531	1528777	246	AGCCTGCTCACACCTCCACACTGCCCACCCCACCTGCCACCTCCACCTGCCCACTCCACTGCTCACCTCCCACTGCCCACCGCCTCGCCGCTACCTGCCCACTGCACCTCCGCTGCCCACCTCCACGC
chr19	15673883	15673982	99	ATCATTCTGTGCTCACTCACTTTA
chr19	17349151	17349228	77	TCTTTCTTTCTTTCTTTCTTT
chr19	17463794	17463950	156	AAGAAGAAGAAGAAGAAGAAGA
chr19	17745317	17746122	805	ACTGCCCAGTAGCTACTTGGGGAGGCTGAGCTATGGCGAGTGAACCTGCTGGAGGCAGAGCCGTTGCAGTGAGCCAAAGATTCATGGCCACTTGCACTCCAAGCCGTGGGTGACAGAGCGACAGGTCTACGATCGTCTTAAAATACAAAAATAGCTCGATAATATATAACTGAAATCAGACAAGATAATAATTACAAATATA
chr19	19908384	19909427	1043	ATATAGTCCCTGTTCTTTTCTTTTCTTTTTTTCTTTTTTTTTTTTTTTGCTGGGAGGGCAGGGGACAGAGGTCTCACTCTGTCCCCCAGGCTGGAGTGCAGTGGTGCTATCTGGGCTCACTGCAACCTCTGCTTCCCAGGTTCAAGCGATTATCCTGCTAAACTACCAC
chr19	20065922	20066219	297	TCAATCTATTCCT
chr19	21164793	21165131	338	TGTGGATAGTCCAAGGATCTCTAAAAATATTTCTATCCTATGTACGAGAGC
chr19	21383390	21383494	104	TCTTCAAAGTGAAATGCTGGCAAAGTAAACAGCCTAACCACACTAGA
chr19	22864116	22864619	503	CCTCCCAGGTTCAAGTGAT
chr19	23138003	23138305	302	GAAAATGGCTTTCAC
chr19	23466454	23466553	99	TTCTTCCTCTTCCTCTCCCCTTCCTCCTCCACAAC
chr19	23466454	23466553	99	TTCTTCCTCTTCCTCTCCCCTTCCTCCTCCACAAC
chr19	23803611	23803916	305	AAAAAATCAGTGACAG
chr19	28028346	28028545	199	CATTTCTTTTATATTTCCCCTTTTTTCCTGAGTATCTCCCATGCACACCTAAAGAATACATGTCAATAAACTTCTGTTTGTTTTGTCCTTTTTTTGTTTGTTTGTTTTACAGGGGATCCTAGCTAAATAGAAGAGTAGAGGAAAAACGACTGTTTCAACCCTTACCGT
chr19	36220300	36220379	79	TTCTATAATTCACTTTTTTTTTTTTTTTTTTTTTT
chr19	37852408	37854327	1919	AACCGTTTAGTAGGGAAAAGAACAGGGACATTCTCTGAGGTCAGAAGAAGGTTAAAGTGAAATATCTGACTTCTCACCAAAAAACTTTATGGAATGAAGTCTTAGTCTAAGATTTTAGAAGCGTCAGGAACCCCATTTCCCAGTTAGAGCTCCTAGTCGTAAATCACCAGAGGAAACTTTGGGAAGCTCTGAGATTGTCGGATCGAACTCTTATTTCTCTTCAACATCAGCTTGCTGTAGCAGCCCATCTCTCTTTCCTGTACTTCTCACTCTCCTTCTTAGTGCTTCTTCCCTCTGACTTTTAAATATGTTTAATTTTTTCATTTTAAAAAAATCCTTCTTTGCAGGGGCCACTTGGTCTTCCCTTGCATGTACTTGAGAGTTGTATGCAGGATTTTG…
chr19	39900106	39900500	394	CCAAGTTAATAACACATGTGAAGTGCAGATGAAAGG
chr19	40837778	40838207	429	TATATATAACAGAGTTAGCTGTAACACACTTGAGCAGCGATACAGAGAGTAGACACTTCATTGACGTTTACAAATCAATAGCTGTGTAGGGCTGTAGTCAGCTACTCGAGCTACAGAACGTAGAGAAGCTGCATACAATGTATGAATCATGAAGAGCAAGTCATCAAAAAAAAGAGTACGAATCAGAGCACTTACATAGTATAGCATATACTGATCATAGAAAGATGACAGACTTATATATCAAT
chr19	42993087	42993134	47	GATGGACACTGTCAATGAATGAATGAATGA
chr19	44365310	44365517	207	AACTGTGCATATATATATGTGTGTGTGTGTGTGTTGTGTAAAAATTGTATGTATGCC
chr19	44377815	44378353	538	AGAAATCTTACAACTCA
chr19	44393363	44394591	1228	GTGATGTGGAGAAGATAATCTGATATTAATA
chr19	51273155	51273449	294	AAGAATTACCACAACTT
chr19	52775931	52778421	2490	CCAGGAGGCAGAGGTTGCAGTGAGCTGATACCATGCCGGATACAAAATCTCTCTCCTTATTATT
chr19	53285485	53285551	66	TCTTTTTTATATGGTAT
chr19	55563798	55563863	65	CTGTTTCTCCTCTCTGCCCCTCTGCCTCCCCCTCTGTGCGC
chr1_KI270709v1_random	11676	11779	103	ATGATTCCTTTTAGATTCCATTTGATGA
chr1_KI270709v1_random	12581	12680	99	TTCCATTGGATGATGATTCCATTCG
chr1_KI270709v1_random	13194	13613	419	CATTCGATTCCGTTCAATGATTATTCCATTCGAGTCCATTCGATGATTCCATTCGATTCTATTCGATGATGATTGCATTCGGGTCCATGGATTATTCCAAATCCATTCCATTAGATGATTCCATTCGTGCGCCATTCAAAGCATTCTCCTCGATTCCATTCGATAATTCCGTTTGATTCCGTTTTGATTGTTGATTCCATTCGAGTCCATTTAATGATAATTCCATTCGATTCTATGTGATGATTCCATTCCTTTCCATTTGAAGA
chr1_KI270709v1_random	9620	10457	837	ATGATTCCTTTTAGATTCCATTTGATGACAATTCCATTC
chr1_KI270709v1_random	9698	10112	414	CGTTTCCATTTAGATGATGATGCCTTTGAATTCCATTTGATGACAATTCCATTCAATACAAATTGATGATGGTTATTTTTGATTCCATTTGATGATGATTACATTCGATTCCATTTGATCATGTTTCCATTCGATTCCACTCAATGATTCCATTCGATTCCATTCAATGATGATTCCATTCGCAGTTCATTGACGATTCCTTTCCTTTCCATTCGATGATTCCATTCAAGTCCATTCGATGATTCTATTCAATTGCATTCGATTATTCCATTCGATTGCATTCGTTAATTCATCATTCGATTCATTTGAGGATAA
chr1_KI270712v1_random	29583	29664	81	TTCCCCCGCCGCGGT
chr2	101785677	101785809	132	TTCTTTCTTTCTTTCT
chr2	10587068	10587277	209	TTTTTTTTTTTTT
chr2	108238964	108239827	863	CTACATGCTCTTACATGTAAT
chr2	109199328	109199851	523	AAATATAAAAATAAATAAAATAAAATAAAATAAAATAAAATAAATAA
chr2	112428859	112428969	110	AAACAAAACCGCAC
chr2	113496566	113496666	100	GTTATCTCCTGTTCCCCCCTTTGACATACCCCATCAATGTGGGTTT
chr2	116482203	116482284	81	GTGTACTAGATCTGATCAACTAGTTCATACATTCATA
chr2	118148519	118148707	188	ACCACATTAATGATCGGCTGCTTAAACTCTACTTAGCTACGAATCTCAGCACTTATTACGAGGCTGACTACTGGGACGCGGACCGTTCA
chr2	118956376	118956550	174	ACAAGTTAAGACAAAGGATAAAAAGTATAAGAAAGAGTACAAGACAGGATAGCATTATGTAT
chr2	122718996	122724931	5935	TGCTTCCAGTACCTCTGTAAAAGCCAAAGCTGTAATAAGCTCAGGCTTTCTGGTTTTACTCCTTCACTTCTTAAAGGTTTTAGGCTCTGATATTACTTCCTCAGAGAGGCCTTCTGTCAATAGCTCATTTAAAATACTTCCCACTACATCATCATTTTTCTGTACGCAGGTTTCCCTTCATAGCACTTATCACTGAGTATATATATATATATATATAATATATATATATACTCAATATATGTATACACACATATATATATAATTGAGATAAATTTGTAAGTAACTTTAAACATGTACTCTATTAGACTCTATATTCCTACACTTCCTCTTATTCACTAAAGACTAAACTCTCTGAATTTCTTGAATGTGAATCACCTTATTCAGCACCATGTCTTTCAT…
chr2	128598381	128598550	169	TATTACATCATAATCACATCACTGTCATTTATCATCACCATCACCATCATCGTTATCATCATCCCATACTCATCACTATCA
chr2	130626008	130626117	109	TATAACTGGAGCAGAAAACTT
chr2	131232785	131232948	163	TATAACTGGAGCAGAAAACTTTAGAAGCATGCAAGGGCTCTTCCTGTAATATTTCATTGGCTAGGTCAGAGTACTCT
chr2	131425104	131425253	149	GGGCGGAGGGCGCGGCGGCGCGGGAGCGGGCGGGGCGTGGCGCGGGCGGGCGCGTGAGAGGAAGGCGGCGCGCGCGCGCCGGCGCTGGCTCAGAC
chr2	132074786	132075029	243	AACAGTGCTGCTGGGTTCTAAGTGTTGTCCTCACATAGGATTCCAGAACACTGCTGCTGCGTTCTGAGTGTTTGTCCCTCACATAGGATTCCAGACACT
chr2	132914287	132915793	1506	TACATTTTAAATATTAGATAACTAAAAGAGTATAATTGCATCTTTGTAACACAAAGGATAAATGCTTGAAGGTATGGGTATACCCATTGTCCATGATGTATTTATATAAAAATTTGAGTCTTGATTAACTAATGCAAAATTGATAAGAAGTGCCAGAGTGGAGTAGACCAATAATTGATGAAACTAATGTTTATAGAATGGTTCCATGTACCTGTGTGCAGAGCCCTGTTTGGCTCTTTGTGCTGCCTTATTTAATTCTCACAATAATCATATGACATACAACTCTTAAACACCCTCTGAACACCATAAGAAAGCTAAGCAGAAAGATATGCAGTGACTTGTCCAAGGTAACTGAAAATATGTAATCTACTCTTGATCTTACAGGCTTTGATGAATGAC…
chr2	133786721	133787037	316	AAATAATTGATGATTT
chr2	137742396	137742451	55	TATATATATATATATATATATATATATATATAT
chr2	149770284	149770779	495	ACTCAGTATAACTACACGTCTAGCTGATGTAATAGTCAGCATGTAACACATTTTATGACTTCTTGCATTTCTGCTCATTCCGTTTTCATACTATATACTCAGGTTTGGCATTCAAATAAGTACACATTCATCTGTGACATTCTCTTGCTTATTTTTTTTTTTTCTTATTTCTCTCGTTTTCCATAGCTCTGCTACTGACCGCTCGGTTGCCATCTTCTCAGACTAAAGTAATCGCCACCATTCATCTGTGCCAC
chr2	150249779	150249812	33	AAGAGAAGAGAAGAGAAGAGAA
chr2	151760790	151761091	301	GCACTCTATTTTTT
chr2	16111000	16111311	311	GATTTTTCACTTTT
chr2	16118090	16118204	114	TAAATTATCTTGTAGATTAAGATAATTTACAAAGTTATCTTTGTAATGTA
chr2	170135517	170135813	296	GAAAAACAATCTT
chr2	170327435	170327497	62	TGTTCTTTTTCTCTCTTACTACACT
chr2	172283313	172283374	61	CTTATTCATTAAT
chr2	177422911	177423335	424	CAGCCAAACAGT
chr2	177631501	177631559	58	ATATATATATATATATATATGTGTGTGTGTGTGTGTGTGTGTGT
chr2	186572389	186572583	194	TTGGGCAACCAAGC
chr2	194612918	194613059	141	TATATTGACTCTTCTAATATTTGATTACTGTCTATAGTTCTATATTTATTGTTTTGGTG
chr2	20085855	20086124	269	GGTTAGTGCGGTCAGAATTCTTACACAAGAGCAGGACCACTGCCCTGTAGCCATTCTGT
chr2	205299548	205299606	58	TCATTTTTATGTCTATATATATATATAT
chr2	207702502	207702807	305	ACTTCCTGGGAG
chr2	211860991	211861174	183	ATAAAATATATATATAATATAAAATGTAGTTTTTTTTTCT
chr2	214884921	214885087	166	TATTGAGAGACGTCTGTCACGACTGCGATGCAGTGGACAATCTGCTCATGAAGTCGTTCCGTTAGCAATTTCTCACCAGTACTGACTAAGA
chr2	216228084	216228390	306	TCTTTCTTTCTTTCT
chr2	233790373	233790676	303	CTTCTTCTCCTCTCTCCCTTCCTCCTTCCTCCTCCTCCCTCCTCCTCCTTCCTCCTCCTTTTTTCTCTCTCCTTCCTCCTCCTCCTCCCTCTCCTTCCTTCTCTTCCTTCCTTCTTC
chr2	235038259	235038395	136	TATATATATATATATATATA
chr2	236793273	236793362	89	GAGCTCAGGCTGGAGCCAGCGTCGCAGGTCGTGAGCCAGACAGTCAGTCAGTCGTGAGCCAGCAG
chr2	238500738	238501235	497	ATGCTATTGATCCATGCCGGCGCTCGATCATATCGAACACCCCGTACTCGCCTCAATATTGGTAGCCGTAGCCGACTTGAGGCGGCGGACATGCGGACCAGGGCGTAGCAAGATCTAGCTGGACCATACTCAGTCTAAAAAAGTGAAGGCTAGACTCGCTACTATGAAACCGCTTCATGATCTCACTCCTGAGCGCTGCCAGAAGTGCGCTGCTGAAGTGATCTGGGCGCGACCTATGGCGC
chr2	240019523	240019846	323	TAAAGAACTGAGCGTTATGTATGCATTTAGCACGTCGATCAGGAGATAGACATCGCAAAGTGAAAGCTCTCTATACAAAAATAGCGGCGTACGCTGTAGTCAGCTACTTGGACTAGCAAGAATGCATAAGAGCAGCTTGCAGTGAGAGATCACTGACTCAGCTGAAGACGACTCGTA
chr2	34572563	34576512	3949	AAAAAATTATTATGTTTT
chr2	4165088	4175891	10803	GGAGCTGTTCCTATTCGGCCATCTTGGCTCCTCCCCCCCAGCATTCATACTTCTAAATGCAGTGGATAAATATATTGCTTTTATTTTCTATGATATATGACATTAGTTAAAACACCTTGCTTTCTACTTATATCCCAAAATCTACGCGATGAAAGATTGAAGAATTATGC
chr2	44409102	44409170	68	ATATATATATATATATATAT
chr2	49385761	49386130	369	TAACCATGGCACCCTGACCTGTACCCTACGTGTAAAGACACGTAGAAACATATTCTCTACAGCAATACTTAATCCTATAC
chr2	5347651	5347904	253	TCTTCTGAATTTCT
chr2	543800	543874	74	AGGTGGGAGGCAGGGAGG
chr2	57194092	57194262	170	TCCTGGCAGGGCAAGTACCCCTCAACACCCCTTCTCTCTTCACCCTTAGCGGCAAGTCCCCCGGTTTCTAGGGGCCAAGAAACCCCAAAACCTTCATCCGTGTCTCTACGCTCTCTTCTATGGGTTTGATTTCTCACTATGGGCAACCTTCCACCCTCGC
chr2	65369655	65369710	55	ATACTAGTGTGGT
chr2	65580387	65580685	298	CATGTTACTTTT
chr2	71030941	71030991	50	CTATCGCGCACTACCATGTCCTGATTTTTTTTT
chr2	71031545	71033441	1896	GCCTGGAATCCCAGCA
chr2	73632386	73632498	112	GAAATATAAAATTCTCTGGACTTGCATGATATTTTTACACTTGCAGTAATAAATCTGGCTTCAGCATTTTCTAATAGCTCACGTT
chr2	75705513	75705605	92	AAGTAGGCAGAGCGCTGGGGCGACAGACAGATGAG
chr2	76546429	76548328	1899	TTTATTCTTTTAA
chr2	78664885	78664955	70	CATCATTTATTTTATTTTATTTATTTT
chr2	84531331	84531611	280	TTATTTTCCTTTT
chr2	91546335	91547567	1232	AAATAAAAAGAAAAAAAGGGCTTTTTGCAAACCCAATTTGCAAC
chr2	91809041	91809618	577	CTCGCCGCGCGCGGCTTTTTGCTCGACCCGGCTTTTTGCCCCCCCACCGCCGCGGCTTTTTCACCCCACTGCCGTGGCTTTTTGCCGCCGCGGCTTTTTGCCCGCTGCGGCTTTTTGCCCCCCCGACCGCCGCGCGGCTTTTTCACCCCCGCCGCGGTGGCTTTTTGCCGCGGCGGCTTTTTGCCCCCTGACGCGCGTGGCCTTTTCCCCGCCGCCTCGGGTTTATGCCCGCCGCGGCTTTTTGCCCCCCTGCCGCCGCGGTTCCCCGCCCTCAACCGCCCTCGCGGCTTTTTGCCCGCCCCGGCTTTTCGCTCCTCCGCCGACGCGGCTTTTTGACCCCTGCCTCCGGTGCCGCGGTTATTTGCCCGCCGCGGCTTTTTGCCCCCCCCGCCGACGCGG…
chr2	91809206	91809235	29	CCGCGGCTTTTT
chr2	92043157	92043734	577	GTCGCGGAGGCAAAAAGCCGCGTCGGCGGGGGGGGCAAAAAGCCGCGGCGGGCAAATAACCGCGGCACCGGAGGCAGGGGTCAAAAAGCCGCGTCGGCGGAGGAGCGAAAAGCCGGGGCGGGCAAAAAGCCGCGAGGGCGGTTGAGGGCGGGGAACCGCGGCGGCAGGGGGGCAAAAAGCCGCGGCGGGCATAAACCCGAGGCGGCGGGGAAAAGGCCACGCGCGTCAGGGGGCAAAAAGCCGCCGCGGCAAAAAGCCACCGCGGCGGGGGTGAAAAAGCCGCGCGGCGGTCGGGGGGGCAAAAAGCCGCAGCGGGCAAAAAGCCGCGGCGGCAAAAAGCCACGGCAGTGGGGTGAAAAAGCCGCGGCGGTGGGGGGGCAAAAAGCCGGGTCGAGCAAA…
chr2	92241410	92241709	299	GTTGAAGCTTTCTTTTGATAGAGCAGTTTTGAAACACTCTTTT
chr2	92372130	92372448	318	AGAGCAGTTTTGAAACACTCTTTT
chr2	92741274	92741494	220	CCCAGTAACTTCTTTGTGAGGTTTGCATTCAAGTGACAGAGTTGAACATTCC
chr2	93666320	93666668	348	CCCGAGAATCTTGTTTGTGATGTTTGGCATTCAAGTCACAGAGTTGAACATTCCTTTCAGAAGAGCAGGTTTGAACACTCTTTTTTTGTAGTATCTGGAAGTGGACATTTTGAAGATCTCAGGATACGGTGAATAAAGGAAAATATCTCAATAAAAGCTAGCTAGAGATGTCAGA
chr2	94753409	94753898	489	AAAAAAGAGAACAGAGATCCCACTTGATGCTTGCCAATAACCCTGCAAGACAAAGTAAAAACCCACACAAACACACTACACACACAAAAACTCACACATACACTCTCACGCATACATACAACACACAAAACTCACACATACACACGCATGC
chr2	99251900	99252126	226	CACGATCTCGGC
chr20	1088514	1088618	104	GTGAAGAAGATTCTCACAATTTTTTAAATAATCAATTTAAATTCAATTA
chr20	11536633	11537020	387	GCGTGCTCACTTCAGCATTTGCTGAGTCTGTCACTGAGAGTGACATCTGATAGACGTACTAATAGGTCGCATCTACGCTACTGCTAGCAGAAATGTTACTGATAGATCATGCTAGAGCCTGATGAGTAATATAGCTGCATGATAGATAGTAGTATAATG
chr20	15730890	15731923	1033	TTTCTTTATTTATTTATTTATTTATTTATTATTTATTTATTTATTTTTTTTTTTTTTGAGAACGGAGTCTCCGCTCTGTCGCCCCAGGTCGGACTGCGGACTGCAGTGGCGCAATCTCGGCTCACTGCAAGCTCCGCTTCCCGGGTTCAAAGCCATTCTCCTTGCCTCAGCCTCCGAGTAGCTGGGACTACAGCGCGCCGCCACCCAGTGCCCGGCTAATT
chr20	19154866	19154931	65	AGAGAGTTTAATGATGGATTCTTACC
chr20	19189383	19189821	438	TATATTCTTTGACTTTCAAGTTTGTAGTTTCCTCATATTTCTTTTAGAGAGTCTGTTGTCAGTGAGTCATCGTTGTCCTCAGTCCTCTTAAATTCTCTCTCATACTATAAGCATACTATTTTGTTTATAGAAGGTTTTATGTAATGTTATTCTATATCTTAATCTATTAAGCTAGCTAATTTAAATATGTAGTTTATGTAGTTTTATTAAATATGTCTATA
chr20	22505504	22505596	92	TTTCTTTCTTTCTTT
chr20	23122668	23122997	329	CTTCACCTGCAAGCCCTCCCACACGGTGACATGACAGC
chr20	26080195	26080484	289	AAAATTATTCAC
chr20	26266160	26266457	297	CAGATTGGATTTTC
chr20	26501108	26501424	316	TTTGAGGATTTCGTTGGAAACGGGAT
chr20	28537222	28537442	220	ACTTTTCTTCTCATAGATCAGATTTGAAAGCCCTCTTTTTGTAGTTCTGC
chr20	29362331	29368735	6404	ATCAGTCTTCTATTCAGTGACTTCTTCATGGGTATGGTGTTTCATTTTAGGATGATAAAGAAGTTGTAGATATGGATAAATTAGATAAATTAGACGGTTGGACAACACTGAATATACTGGATGCCACAGAACTATACATTTAAACATGGTTAAAATTGTAAGTTTTATGTTATATATATATTTTACCACCAAAAGAGGGCCAGGCTTAGATGTTTATATGTTAGGGGTTTGGAGTACCTCTAACATTTGTTCCCCTCCAGGAGAATAATTTATAAACACCCACACAAGAAAAGTAGATACTGACTTCACAAATCTCCTTACAAGTCCCACAGCAGGGCTGTCTGGGAATGCTGAGGTGGAAAAAGTCACATAAACTTGAGGTCAATGTGAGACCTCCCA…
chr20	29401541	29401644	103	GCTGTTTCGGAAA
chr20	29651593	29651818	225	CCAGCACTCTGGGAGCTTGAGGTGGGCGGATCCCTTGAGGTCGGGAGTTGGAGACCAGCCTAGCCAACATGGTG
chr20	29651593	29651818	225	CCAGCATTTTGGGAGTTCGAGGTGGGCAGATCCCTTGAGGTTGGGAGTTGGAGACCAGCCTGGCCAACATGGTG
chr20	29651593	29651828	235	CCAGCATTTTGGGAGTTCGAGGTGGGCAGATCCCTTGAGGTTGGGAGTTGGAGACCAGCCTGGCCAACATGGTGAAACCCAT
chr20	29709723	29709798	75	ATCAAAGGAAAGGTTCAACACTGTGAGTGAAATGCACACATCACCTA
chr20	29810438	29810811	373	GACACTTTTCTTGCACTTTTGTTGAAAGTAAGTTTAGTTTAGG
chr20	30017496	30017682	186	CAGCATTCTCAGAAACTTGTTTGTGTTGTGTGCATTCAACTCACAGAGTTGAACCTTTCCTTTGATTG
chr20	30170391	30170570	179	ACATTCTGTCTATCTCTGTACTTTCATTAGTCAGCTCTTATTCAGTGAAGACCACTATCTTATTT
chr20	31063045	31063099	54	TGGAATGGAATGCAATGGAATGGAATGGAAT
chr20	34817119	34817214	95	CGTCTCAAAAAAAAAAAAAAAAAAAAAAAAAAAAAAAAAAAAAAA
chr20	38708346	38708412	66	AAAATAAAATAAAATAAA
chr20	39722235	39722304	69	AACTCCTGCCTCAGTTCTTACAATTTA
chr20	49927164	49927304	140	GAGAGCTGACTGAGGAGGAGAGAATTACTTGAACCGGGAGGAACATAAATAAAAAATAATAAGAGATCTGGACAG
chr20	5962288	5962695	407	TCTGTGTAACAAGTGAGTCCAGCTCAATCAGGAGAAGTTAGCTTCATTCTATGCGAGTCTCGCTCGTCGCACATGCTCTGTTGGGAATCAGCCAAGTGCTCGTCAGCATTCAGCTCAGGCCTCGTCTGACTAATGCTCCACGGCAGCAATGTGATATTAGAGACTTACCTTTAGCAGTTGTCTCGATCTCGATATGTGCACGTCGGCTCCAAGTCTGATTACAGGCGTAGAGTTCATTCTTAAGAGAT
chr20	61229639	61229669	30	ATATATATATATATATATAT
chr20	613780	613839	59	TCTGCCTGTCTG
chr20	63559294	63559549	255	GCACGCGCAGGCCTCGGTCAGAGCTACGAGCGCGCAGCGCAGAGAGGTGTCTCTGTGAGGCTGGAGCGAGGGAGTCCCAGGGGGTGGGAGAGCAGGTCAGGGGGAGGTCAGGGTCAGTGTCAGTCTGTCAGTGGAGGAGGTGGTGGAGTCAGCAGTGGGAGTCAGTCGGTCGGTGAGATCAG
chr20	709807	709950	143	GTGGTCGGAGGGGGGAGTGGATGTGGTGGAGGGATCACGAGCTGGGTCGGATCACTGCCGCTCCCCGCTCCC
chr21	10140640	10141122	482	TATGATATATATACATATATACATATATTATGTATATATATACATATATATATATATATAATATATATATACTATTATACATATATACATATTGTGTATATATATATACATATATATATACATATTACATATTGTGTATATATATATATACATATATATATACATATTTATGTATATATATACATATATACATATATGTGACATATATACATATATATATATATACTAATACATTATAATATATACTATATATATGTATATATATAATATATACATATATATATCTATATTATATAATACATATATAATATATGTATATGTCATATATATATATATTATAATATATA
chr21	10403978	10415676	11698	TTTCAAACAGAGTCTCACTTTCAAGT
chr21	10403978	10415676	11698	TTTCAAACAGAGTCTCACTTTCAAGT
chr21	10767570	10767780	210	AACACATGCATCACGAAAAAGTTTCTCAG
chr21	13384080	13384173	93	ATATATATACTATATATATATTATATAT
chr21	14065637	14065696	59	TTCTTTTTCTTCT
chr21	14088097	14088326	229	ATTATAAATGAT
chr21	19773184	19773284	100	TATATATATATATGTGTATATATA
chr21	32477720	32478010	290	CCTCCCCGTACGCCTCCCTCCCCGTCCCCCCCGTACGCCCTCCTCCCCCGTCCCCGTACGCCCTCACCTCCGCCATACGCTCTCGTACCTCACCTCGTCACCTCTGCCTACTACGCCTCCCCTCCGCCATATGTGCTGTCACCTCGCCATACCTCATGTACCTCGCTCCCACCCATACGCTCTGCTTCACCGTGCACGACGGCATATGCACGCATATTAT
chr21	43018468	43018514	46	CGGCGCCCCCCCCCCCCCCCCCC
chr21	6870728	6872108	1380	GTCTACGACTACATCTAATTCACAATTACA
chr21	7659074	7659149	75	TGTAGTCCTGCAG
chr21	8219425	8219582	157	CTCGGCTCGGTCG
chr21	8219957	8220031	74	CTTTCTTTCTTCTTTCT
chr21	8402413	8402543	130	AGGCCCCACGGGGCGTCCCCGCACCCGGCCGACCTCCGCTCGCGACCTCTCCTCGGTCGGGCCTCCGGGGTCGACCGCCTGCCGCCCGCGGCGTGAGACTCAGCCGGCG
chr21	8446695	8446852	157	CTCGGCTCGGTCG
chr22	11030735	11032159	1424	GTGTGTTCCACCACCGTGTTATCCAAGACTGGTCTCGAATCTCCTCTGACCCCTTTGATCCACTCCTCTCGTTCCTCTCCAAACTGCTGTGATTACAGCGTGATCTTCCACTGTCTCCTGCTCCCCGATTTTTCTTTTTCTTCAATGATATGGCTGTCATGTTGGTGTGTTCCTTGTGTCCTCCAGCCACTTGGAGTCTGAGATCTCGAGGATTGCTCTGAGCCCAGGAGTCTTGAGACCAGCCTGCTGTCACATTAGCTCAAGACTCCCATCTCTGCAAATTTTTTTAACAATTCATCGTTGCCATGGTGCTGCTCTCTGGTCTTGAGATCCAGCTCTACGGCCAAGATAGCAATCCCCATCTCTCTCCAACTTTTTTTTTAATTATTGGGCATGTTG…
chr22	11057574	11057891	317	GGTGCGGTGGCTCACGCCTGTAATCCAGCACTTTGGGAGG
chr22	11140259	11140625	366	AAGATAAGGAAAAGAAGGAATGGAACATGATGGAGAAGAACAAGAAATGGAAGAAGCAGTGTTTATAAGAGAAACTTCGAAACGCAAAGATCTGAGTACGATGCAGAAGAAACTTCACGATGGTTAAACATTAGTAAAAAAAAAAACAGATTCACAGTACTCTTTCATATCAAGAGAGTGAACATTGCGTGCCTAATAATTGCTAGTCTGAAAGATCAATAATGACATACGATGTGAAATGACAGAAAATTTAAGTTCTAATCATGTT
chr22	12370314	12370837	523	CCTATCAAAAGAGATGTTT
chr22	12405755	12405834	79	ACACAGAAGCATTCTGAGAAA
chr22	12409167	12409598	431	TGTAAAATCTGCAAGTGGATACTTGGTGCGCTTTGTGGCCTATGGTGGAAAAGCAAATATCTTCACATAAAAACTAGAGAGAAGCATTCTGAGAATGTTCTTTGTGATGTGTGCATTCACCTCACAGAGTTGAAACTTTTTTGTTGAGGGAGGTTTAAA
chr22	16066457	16068542	2085	GTTTGTACAAAAAGAGAGATTCAAAATTGCTCCATTAAAAGGAAGGTTTTACTCTGTGAGATGAATGCACACATCACAAAGATGTTTCTCAGATTGCTTCTGTCTAGATTTTATGTGAAGATATTTCCTTTTCTACCATAGGCTGCAAAGCACTCCAAATGTCCACTTGAAGATTCTACAAAAAGAGTGTTTCCAAACTGCTCAATTAGAAGAAAGGTTCAACTCTGTGAGATGAACACACACATCACAAAGAAGTTTCTCAGAATTCTTCTGTCTGGTTTTTATGTGAAGATATTTCATTTTCCACCATAGGCCTCAAGGCACTCGAAATGTCCACTTGCAGATTCTACAAAAAGAGTATTTCAAAACTTGTCCATCAAAGAAAGTTTCAACTCTGGG…
chr22	16329578	16329718	140	CATATTTCATTCGGTCATGGTATCAATTCGAATTCCTTCGGATGGTTATTCCATTCTATTCCTCTTCG
chr22	16502482	16502848	366	AAGATAAGGAAAAGAAGGAATGGAACATGATGGAGAAGAACAAGAAATGGAAGAAGCAGTGTTTATAAGAGAAACTTCGAAACGCAAAGATCTGAGTACGATGCAGAAGAAACTTCACGATGGTTAAACATTAGTAAAAAAAAAAACAGATTCACAGTACTCTTTCATATCAAGAGAGTGAACATTGCGTGCCTAATAATTGCTAGTCTGAAAGATCAATAATGACATACGATGTGAAATGACAGAAAATTTAAGTTCTAATCATGTT
chr22	16545731	16546937	1206	GGTTGCAAATTGG
chr22	18727979	18728272	293	ATTACTTAAGATTTATCTATATATTATATCGATATATATATATATATTGATGATCTATCATCGTTGTATAGTATATACCATATTATATGTCATATAACGTATGTAGATATATATTCTACACATAATTATGATTATATATAAATATGTATGAGTTATTTTACATATTTATCTGTATTATACATACATGATGATATACTATTATACTAAGTAATGGATATAA
chr22	20337566	20337697	131	TATACATACTATTATTACATATTATATATATAATTA
chr22	21165482	21165764	282	TATACATACTATTATTACATATTATATATATAATTATATAATATTATAT
chr22	22267011	22268217	1206	CCAATTTGCAACC
chr22	22696404	22697053	649	ATTATTAGTTTATTTAGTAATAATATTATTATTTATTATATAAATAAACTAATCCATTAATATTTATTTTAATATGAATCATTAAAAAAATTTGTCATAGGCAATGGGGAAGGAGGAAAAGATATTAAAAATAATTTTGAGGAAAAAACCAAAATTGTATTTCTCAAATGTCTGTGTGTCTTCAGTGTCTCAGGGTTGAGAGCGGTCAGCTTTAGGTTGTCCTGAGGATGTGCTCAGATGCGGGAAAGCAAGAAAGCATGAAACACGCATCTCTGTGACCTGACA
chr22	22697289	22697483	194	GTGGACTCGGTCTCAGGACTGCGGTCCTCTCAGG
chr22	25460292	25460414	122	TAGGCCCTCCACCC
chr22	33355629	33355785	156	AGATCTTTCATGT
chr22	36731046	36731205	159	TTTTTGTTTTTTT
chr22	42705460	42706185	725	TCTCTACTGAAAATACAAAAAATTAGC
chr22	44252914	44253007	93	TTGAACCCAGGAGACTCTGTCTGA
chr22	44269224	44269503	279	CCAGACACCCACAATACACATACACACACACCCCATGCCACACACCATGCTGCATACCCACAACATACACATAGACACACGTCACAA
chr22	45479155	45479471	316	TATTATAAATTTTT
chr2_KI270772v1_alt	41511	41614	103	TGCGCTTATTCGC
chr2_KI270772v1_alt	41566	41620	54	CTTTCTGCCCCC
chr2_KI270772v1_alt	42036	42134	98	GCCTCCGCCGCCATGCGTTTTTGCCCCTGCGCCGGAGGTT
chr3	100066509	100066865	356	GCTTTTTTTTTTTTTGAAGGAGTCTCGCTCTGCCAGGCTGAGTCAGTGGCGATCTGCTATGAAGCTCGCCTGGGTCACCATCTGCCTCAGTCCAAGTGCTGGACTACAGTCTACGCGGTATCATATAGCAGACGTTTACCATTAGCATGTTGATCTCGACTTGATCCGCGCTCGGCTCAAATCTGATTACAGCTGTTTGCTTAAACAGACCAGACCATCCTGAATCTG
chr3	102564731	102565270	539	GCTCAGTGTTTGCATCTGCTCTCTGTCAGACAGTCTTCCATGCAGTGGCCTGTCAGCTCAGGAGACTAGAGCCAGAATCCCAGATGGCTCTCAGGATATGTCTCAAGTTTAGAAGCCTGTCCCAGGCCGCCTGCGGCTGAGTAGCATCGGCAGCAAAGTTGGAGCAGCTGCGATACTGTTGCTCGCAACGCCCAGGAAGAATGCTGAGAGAGAGCCAGATAGATGGTGAGCTACTATGATCGCGCAGTCAAACTCGCTTCCAGAACTAA
chr3	104697466	104697603	137	GGGATGCTCCCCAAGCC
chr3	105280781	105280888	107	TATATGTATACACACATAT
chr3	121554957	121555046	89	AAAGAAAGAAATAAAGAAAAGAAAGA
chr3	125896699	125897087	388	AGAGATACACAGCTTCCTGTTGTGGATCACACCACTAAGACATTTGAAGTTCTCAGCACAATGAACACGCCATTTGAGATGCATGCAAAGACAAGAAGCGCCTCGCACAGAGAGATGGTAACCCAG
chr3	130031074	130031327	253	CCCCCTCCTGCTGGGAGCGTGTATAGATCCGGGGGTGACAATATCCGGGGGGGAGAGGCGGGTGTCATTACTCCCGATCGCGGGGCGCGCCATTGCGGGGAGGCGTCAATCCCCCCTGCGTTTGGGCGCTCTGTTCTGATGT
chr3	130078865	130079088	223	GGCCTTCAATCCTATAAAAATGATCACCT
chr3	137595614	137597602	1988	TTATCTCTGCGCC
chr3	149126601	149126915	314	AAGATGCAAAAATA
chr3	158399130	158399457	327	CTATTATTTCCTTTTT
chr3	158855071	158855139	68	GGCTACTCTTGGCTCTCTCT
chr3	161528908	161529377	469	TATCAGTGTCAGAATGTGTTTCCTGCAATGCTGGTCAGTAATAGTGTCATTCACTTGGAAAGGCCAGTCATTATAAACATACTATCATCTCAAGGAACAAGAGACTTGATAATTGCCTCCTCAAACAGTCACAGTTATTCTGAAGAAGTCTTGTTATCAGAAAAGCAATCTTCATAGTATAGTCACTA
chr3	162807956	162829872	21916	TTTCAATCTCTTTGTTAAATTTATCTATTAGGATTCTGAATTTATTCTGGGTGTTCTCCTGAATTGTATTGAGCTCCCTCAAAAGAGCGATTTTGAGTTCTGTCTGAAACGTCACACATCTCTGTTTCTCCAGGATAGGTCCTTGGTGGCTTTCTTAGTTCATTTGATGAGATCACGGTTTCCTGGATGGTCTTTTATGCATGTGGATTTTCATTGTGGTGTCTGGGCATTAAAGGGTTAGCTGTTTATTGTAGTCTTTACAGTATCAGTTTGTTTGTACCTGTCCTTCTTGGAAAGGCTTTCCAGGTATTCAAAGGAGCTTGAGTGTTTTGTTCTAAGCCTTTGGTCACTGCAATTATGAAGATTTTAGAGGCATTCCTAGCCCAGTGACACTGTGGC…
chr3	16751702	16751739	37	ATATATATATATATA
chr3	176361767	176361820	53	GGCTGGGCTAGTCCCCAGCTGGCTGGG
chr3	176361767	176361828	61	TAGTCCCCAGCTGGCTGGG
chr3	184544655	184544831	176	CTCCTCCCTCCCTCACCCGCCTCCCTCCTCCCCTCTCCTCCTCCGCCTCCTCCTCCTCCCCCCCTCTCTCACTCCCCTCCCCTCCCCCTCCTCCTCCCTCCTCCCCCTCCCTCCTTCCTCCCCCTCCCCCCTCCTCCTCCTCCCCTCCTCCTCC
chr3	185299554	185299867	313	CTCTCTCTCTCT
chr3	194834923	194835565	642	TGCTGCAGCTACAC
chr3	32379097	32379225	128	GAGGATTGCTTGAGTCCAGGA
chr3	33511713	33512585	872	AAGAACACGTAAAA
chr3	36453629	36453796	167	GGAGGCTAGGGATTGTAAACACACAGACGA
chr3	41295185	41295745	560	CCAAAACAACCTTTAT
chr3	42796883	42799320	2437	AGAATCTTATAACTTCC
chr3	45726869	45727228	359	TCTTTATTTACATTTATACATTGGTATATTGTATTTTTTGTTTCTACATTTGT
chr3	70365957	70366543	586	TTGCTGCTTTTTACTCTTTTCTTTTTACAATCTCCTTGTCTCTGCTTCAATTCATGATCCTTGGTCAAATCTAGCTCTCTGATCACTTTATTATATTTTGTGATTTTTCCAAAGTGTGATGATATATTGGAATCTATGTGAGTATATAGCCTTTTTGCGTTGCTGGCTTCATTAAACTTCTATTAACTGTAATATTGGTGTATTCTTTTCCATGTATGTTTGTTTTTTGTTTTGTTTCTTATTTTTTGTGTTTTATTGTTTTTTTTTTTTGTTTTTTGGCCTTAATAGCTTATTTTTTTCTAATAGCTACTGTTATAATGAATA
chr3	72502319	72502412	93	AAAGAAAGAAAGAAAGAAA
chr3	7778828	7778889	61	TATATATATATATATATATAT
chr3	78182672	78182765	93	TTGTAAAGAAAAATAAGGCTTTTTTGTC
chr3	90348717	90348820	103	TCTACAAAAAGACTGTTTCCAAACTGCTCAATCAAAAGAATGTTTCAACTCTGTGAGTTGAAAGCACA
chr3	99263598	99263654	56	ATATATATGATATATAT
chr3_KI270780v1_alt	143399	143859	460	CATATATATATATATATATATATAATATACACGCATATATATGTATATATATATACACACCATATTATATATACACCGCA
chr3_KI270784v1_alt	108874	110192	1318	TCAACACTATTTAACGATATTTTTTTAAATGGTGTTTAAAACGGATATTTTACATATATATATATATATATATATAT
chr3_KI270895v1_alt	117519	118334	815	GCGCCCTAAGAACAGGGCACTAAG
chr4	106683143	106688122	4979	AATACCTCTAAGAAACTAAATT
chr4	112427327	112427415	88	CATAACCATATAATACATGTATAATTATTATTATGT
chr4	129144972	129147288	2316	CGCCGGGCGCGTGGCTCACGCCTGTAATCCCAGCACTTTGGGAGGCCGAGGCGGGCGATCACGAGTCAGGAGATCGAGACCATCCGCTAAAATGGTGAAACCCCGTCTCTACTAAAAATACAAAAAATTAGCCGGTGCGTGTGCGGGGCCTGTAGTCCCAGCTACTTGGGAGGCTGAGGCAGGAGAGATGGCGTGAACCCGGGAGGCGAGCTTGCAGTGAGCGAGATCCCGCCACTGCACTCCAGCCTGGCGACAGAGACGAGATTACGAGTCTCAAAAAAAAAAAAAAAAAAAAAAAAAAAAAAAA
chr4	130690058	130690268	210	TTATATTGTATATACCAATCTTTTCTACTATATACATATTAAGATATATATACTTTGAAATATATATTATATTGATAGCCATCTCCATTAGTATACTTGAAATTTTTGC
chr4	130773685	130773921	236	AAGAAATATAGAA
chr4	131925694	131925941	247	AAACAAACGTTCAGAATATAAAAAGAATATTCAAAACTGTTAGCATCAATGTTAGTATATAAGATATTCAATATTATCATTATAATCAATGTATTATATAGTATTATCATTTTATTAGTAAAATGTATATTATGATTATTTATTATTCATTTATTATAATTATTAATGAGATATATGAA
chr4	132444317	132444411	94	GAATAAAATGTATCCCAA
chr4	133220464	133220758	294	CTTCTGTCATTTCTT
chr4	145321271	145321357	86	CGAAATAAGAGATAAAGTCTATAAGTATATTGATATACATATATGATT
chr4	14914595	14914666	71	ATACATATATATATATACATATATA
chr4	149239840	149240368	528	AGGTCTTATATCTTTGCTTGTATTTCCTATAATCGTCATGTTAAACTGGCTGCTCTAGCGCGTTGTCAACTATCCAGCACTTTACTATGGATCGGCTATGGGTATAAATCGAGACTGCTGCTAACGTAAACTCTACTAAATACAAAAAGTAGCCGGCGCGTGCGGCTCTGTATCAGTACTCGTAGCAGATGTGTGAACTTGACGACTTGCTGACAGATTGCCACTGCATGCATCGACTGGCAGACAGCTCGTCTAAAAAAAAAACAACATAAAACTGCTACTCAAATATCATGCCTTGCTGATTTCTTGTCTATTGTTTCCTGTACCAGATCAAGTAATAGTCAAAGCATCATAGTATGTCTCTAGACAATACTATCAAATA
chr4	150029890	150030199	309	TAAAGTATTTTTA
chr4	150658559	150658727	168	CCTCTCCCTCTCCCCTCCCTCCCCTCTCCCTCTC
chr4	161132100	161132510	410	TATAAATCTTGTAGAAAGATTTAGCATGCATATCACAAGGACTAATGTCTTTTAAGTTTCAGAGCCCATGTGGATTTCTTCTTCAGTGAATAAATAAATCCTTTAGCTATATTAAAAAAAAAAAAAAAAAAAAAAAAAAAAAG
chr4	164346617	164346652	35	TATATATATATATATATAT
chr4	165264722	165264750	28	TATATATATATATATA
chr4	17392774	17392816	42	AAAGAAAGAAAAGAAAGAAA
chr4	174705670	174705715	45	AAAAAATATATACGCACGTA
chr4	183642192	183642445	253	TAAGCTTTTTGTAGAGAAGGAGTCTTACCAGTTTCCCAGATGGTCTTGAACTCCTGGGCTCAAGCAATCCTGCTTAGGAC
chr4	186172335	186177089	4754	CGGCCGGGCGCGGGTGGCTCACGCCTGTAATCCCAGCACTTTGGGAGGCCAAGGCGGGCAGATCACGAGGTCAGGAGATCGAGGACCATCCCGGCTAAAACGCGTGAAACCCGTCTCTACTAAAAATACAAAAAATTAGCCGGGGGTGGTGGCGGGCGCCTGTAGTCCCAGCTACTTGGGAGGCTGAGGCAGGAGAATGGGCGTGAACCCGGGAGGCGGAGCTTGCAGTGAGCCGAGATCGCGCCACTGCACTCCAGCCTGGGCGACAGAGCGAGACTCCGTCTAAAAAAAAAAAAA
chr4	218269	218618	349	GCCCCATAAGTCACAACTAGTTCTCTGATTTCACTTATAGTCAAATTA
chr4	22594160	22594512	352	AAAAAGTTCTGAAAGC
chr4	2627387	2627539	152	AAACAGGTGGGT
chr4	31204207	31204514	307	TGAAGGCTTCTT
chr4	40023328	40024663	1335	GGCCGGGTGTGTGGCTCACGCCTGTAATCC
chr4	407265	407582	317	AAGAATAAGGCGG
chr4	4124766	4125072	306	AGAAGTGAGGACATGA
chr4	42021925	42022085	160	CGCCACCACGCCTGGCTAATTTTTT
chr4	46053989	46056180	2191	AATAGTATCCCATC
chr4	48659571	48659920	349	GAGAAGAGGAAGAGGAAGAGGAGGAAGAGGAA
chr4	49091850	49091896	46	TCCATTCCATTCCATTCCATTCCA
chr4	49098067	49098166	99	AATCCAACCCATTCTGGTTGATTCCT
chr4	49099932	49100009	77	GGGTTGATTCCATTCCATTCCATTCCATTCCATTACTTTCCATTCCTTTCCAT
chr4	49109266	49109504	238	TGCCCCTTTATTCCATATCCATTCCATTCCATTCCATTCCATTCCATTCCATTCCATTCCATTCCATACCATTCCACCAAAGTTTGATTGCATGTTTTTCCATTACATTCAATTCCATAAGCATTCCATTTCCATTCCATT
chr4	49110100	49110294	194	TGCATTCATTCCATTCCGCTCCCATCCATTCGTGTTGATTTTCATTCCATTCCACTCCAATCCGTTCCATTCCATCCAATCCATTCCATTCCATTCCATTCCTCTCGCATTCACATCTATTCCATTCATTTCATTCCGTTCTCTTCCATTCCATTGTTGTGCATTCCA
chr4	49115390	49115756	366	CGTGTTGATTCCATTCCATTCCACTCCAATGCATTCCATTCCATTTCCAATCCATTCATTCCTTTCAATTCCACTCGCATTCAATCTATTCCATTCCATTTCATTCCGTTCTCTTCCATTCCATTCTATTGGATTCCATTACCATTCCATTCCACTCGGGATGATTCCATTCCATTCCATTATATTCCGTTCGATTTCCATTCCATTCCATTCCATTCCACTCGGTGGATTCCATTCCATGCCAT
chr4	49122127	49122249	122	TTCCATTCCATTCCATTCCATTCCATTCCATTC
chr4	49122127	49122670	543	CCTTTCCATTCCATTATATTCTATACCATTCCACTCGGGTTGTTTCCACACCATTCTATTCCCTTCCACTCCATTAAATTCCATTCCAGTCCATTCCATTTCACTCGGGTAGATTCCATTCCATTCCATTCCATTCGGGTAGTTTCCTTTTCATTCCATTCAATTCCATTCAATTCTATTCCTTTCGAGT
chr4	49122623	49122692	69	CTCATTCCATTCATATACCATTCCACACAAGTTGATTGATGTTATTC
chr4	49125022	49125176	154	TCCACCAAAGTTGAGTGCATGCTATTCCATAT
chr4	49127686	49128294	608	TTCATTCCGTTCCGTTCCATTCCATTCCTTTCCTTTCCACTCTGGTTGATTCCATTCCTTTCAATTCCGTTCCTTTCCGTTCCGTTCCGTTCCATTCCACTCCATTTCATTCCATTGTATTCCACTCGGATTGATTCCATTCCATTCCGTTCCATTCCATTGCATTCCATTCCACTCAGGTTGTTTCCATTCCTTTCCATTAGTTTCCATTCCATTCCATTCCTT
chr4	49137296	49137532	236	TACGTTCCATTGCATTCCGGTTGATTCCGCTTCCATTCCATGCCCTTTTATTCCGTTCAA
chr4	49137551	49137642	91	AAATTCCTTTCCCATTCCATTCCACTCAGGTAGA
chr4	49140044	49140141	97	TAAATTCCTTTCCCATTCCATTCCACTCAGGTAGA
chr4	49146077	49146534	457	CACCAAGGTTGAGTGCATGCTATTCCAATCCATTCCATTCCTTTCCACTCCATTCAATTCCATTCCTTCCAGTTCGGTTGATTCCGTTCCATTGAATTCCGTTTCTGTTCCATCCAGTTCCATTCCATTCCTTTCCATTCCATTTCATTCCATTGCATTCCACTCGGATTGATACCATTCCATTCCATTGCATTCCAGTTGCATTCCATTCCATTCCACTCCATTCCTTTCGGGTTATTCCTTTCATTCGATTCCATTCCATACCATTCCACTCCATTCCGTTCCTATTCCATTCGGTTGATTCCGTTCCATTCCATGCCTTTTATTCCATTCCATTCCATTCCTATTCCATTCCAGTTCCATTCCATTCTATTCCA
chr4	49147949	49147988	39	ATTCCATTCCATTCCA
chr4	49147953	49147988	35	ATTCCATTCCATTCCATTCC
chr4	49147953	49147988	35	ATTCCATTCCATTCCATTCC
chr4	49156256	49156356	100	ACTCGTGTTTATTCCAGTCCATTCCAT
chr4	49156256	49156356	100	ACTCGTGTTTATTCCAGTCCATTCCAT
chr4	49156300	49156356	56	TTCCATTCCATTCC
chr4	49646731	49646929	198	ATGGAATAGAATGGAATGGAATGGAAT
chr4	49651437	49651498	61	ACGGAAATGGAATGATATGGAAAGGAACG
chr4	55445066	55445279	213	TCTGCTGTGCTTTTTTCTCTGTCTGCTTTATGTCAGGTGTGCCAAACGGAAGCTTCCCCGGTTAGCTTGTCTTAGTCAGCTC
chr4	60423449	60423920	471	AGAAGAATTTGAGTTTGGCCTGCGGAGATACGCATAATGGAGTCAACATGGCAAAGGAAGGAAGGAGGGAGGAAGAAGAAGGAAGGAGAAGAAGGAAGGAAGAGAAGGAAGGAGGAAGGAAGGAGAAGAGGAGGAGGGAGGAGGGAGGAGGAGGGAGGAGGGAGGAGGAGAGGAGGAGGAGGAAGGAGGGAGGAGGAGGA
chr4	64853369	64853833	464	AAAAATTAGCCGGGCGTGGGTGTGCGCACCTGTAGTCCCAGCTACTCAGGAGGCTGAGGCAGGAGACTGGTGTGAACCCGGGAGGCGG
chr4	70516356	70516406	50	TATATATATATATATATATATATATATATACA
chr4	7387290	7387376	86	ATACACATGCACA
chr4	76918888	76918928	40	AAAAAAAAAAAAAAAAAAAAAA
chr4	789922	790120	198	AACAGGTGCCACGCTGAAGCAGGTGCCCTACCCAACAGTGGCCAGCTGAGGCAGGGTTCCCCCCACAGCACGCCTGAGGGCGGTTCCCCTGCGCCGAGAGGCCACGCCTGTGAGGGCAGCGTCCCCCCAACAGGTGGCACCTGAGGCGGGTCGCTCCCA
chr4	82294221	82294299	78	AGCAGAAAGAAC
chr4	87111005	87111319	314	TACTTAAACTTTATTTTT
chr4	9040594	9041259	665	ATATAATATATATATATATGTGTGTGTGTGTGTGTGTGTGTGTGTGTGTATATATATATACACATATATACATAATATATATACACACA
chr4	92384565	92384628	63	ATATAATATATATATATATATTATATATA
chr4	93517970	93518074	104	CTACGCATATATCTATATATATGTATATATAATGTATATATATATATATATAATATA
chr4	9687284	9687389	105	CACACTTGTCCTATAATACCCAGCACTTGTGTGATGACTGA
chr4	9955212	9955517	305	AAAACTCCAAGTC
chr5	109422673	109422771	98	GCAGACGCAGAACTTATCCGTATTCAGGAAAAAAAAAAAAAATATATAATATATAGT
chr5	116558454	116558763	309	AAGGATTCTTTT
chr5	117097889	117097918	29	ATATATATATATTATA
chr5	118046057	118046396	339	ATAAATATATAT
chr5	122938661	122938970	309	AAAAGGCAATGAAG
chr5	137686891	137688199	1308	AAAATATTACCTCCCT
chr5	143974061	143974262	201	TAGCTGTCATGCTACAGATTACGATCATGAGCAGATCATGAGATCGATGGCAAATGCAGAAAATCTTGGA
chr5	150084371	150084457	86	AAGAAAGAAAGAA
chr5	153606851	153606975	124	TTTATCTCACTAGTTATTCAGATTTTGTTAGTTATCTTGTTCTGTATCCATGCTGAC
chr5	161004313	161004631	318	AGATTTCTTTTTT
chr5	164939308	164939603	295	CTCTAAGGTCTTTTT
chr5	177812803	177813122	319	CCCCACACACCCCACCTCACATCCCACCACACCGTCACCTGCACCCCACACCACACCCCCCACCCACACCCCACACACCCCCCCACACACCCTCACACCACACCCACCACACCTCACCCACACCCCACCCTCACACCCCACCCACACCCCCACACACCCCCCCACACACCCCACCCACACACCC
chr5	178250705	178250756	51	CATGGTGGCATCG
chr5	196655	196723	68	GTGTGTCCCCACCCCA
chr5	2657041	2657093	52	GTGTCCCTGGCAGC
chr5	26796589	26801799	5210	ATACATTTAATGAGAGCAA
chr5	34304695	34307828	3133	TCAAGACATTTTTTCAAG
chr5	34677113	34677201	88	TGTGATTGTAGTTGTTAGATTATACTTCCTTTGTTCTCTGGATTGAAGACAGTAGTATCATCTCTT
chr5	35614085	35614386	301	AAAAAATTGAGG
chr5	35734387	35734443	56	CGCACAAAAGAAGAATAAGGA
chr5	44125424	44125645	221	ATAAAAGAATTCGTCTAAGTTCCTGATCACAAGAATAATAATTCGATGATAGAATCAAATCCGCTAGATTGTCTCATAATCAGATCACGTAGATCAGTCGATACA
chr5	4459337	4459376	39	TATATGATATATATACATACATATATATC
chr5	49611724	49612098	374	TATATGAAGAAATCCCGTTTC
chr5	49660567	49660637	70	TTCCATTCCATTCCA
chr5	50115954	50116266	312	ACAGAGTGTTTCAAAACTGCT
chr5	50118164	50118480	316	ACAGAGTGTTTCAAAACTGCT
chr5	50120378	50120694	316	ACAGAGTGTTTCAAAACTGCT
chr5	54785893	54786150	257	CTGACTGCTGAACTGCTGCTGACACCGGGAGTCGTGTTCACTGAATCGCAGCGAGTGGGGAGAGCAACCACATCATATCTGCTTGAGGCATCGCCAGCAGAATGCAGACAGCCAGCTAGATCAGCACTCAAGCATCCATAATTGAGTCCAGAGCAGTCACCAGACGCCACA
chr5	61997815	61998320	505	CTCGATGTCTCACGCTTATCCACATTAGCTCATATCACAAATCGAGCTTTGTCAGCATATATACGTCTCTACTAAATATACATAAAATACTCGGCGCTGAGTCAGTACTGTAGATGCTGCGACATCTTGAGTTTTATAAATTCGCAGTCGTAAAGCAACTTACAAATAAAAACATAAAACATTCTTTATCTCAATGTTTGCAGCATATATATACAGTATATATAATATCGATGTCTTGCATTTATTAATAGTACTTACATAACATAAATTCTTTGTGCGACGCTATACTCATAAGTGCGA
chr5	7221830	7222266	436	TGATTTAAGATTTTCATACTAGTCCAATGATACTCGCTTCCTTAGCATTCTTCAGTAGTACTGTAAGCGCCAGGTAATTTTGTATCTTTAGTGACGTTTCACTTTTGCAGATGTTGATTCTCTTCAGATGATCGCTCTAAGTCTGATTAGGCGTAGACCTTACCATATGCAGTTTTAAATGTATATACTTCTGTTTCAATATGAGTGCCAGTTATCAAGTTGTCTTCATGATTCTAGTCCTAATATCTAAATTATAGAGACAAGTTTGATCTA
chr5	92184972	92185313	341	AATAAAGTCTATT
chr6	10070574	10070874	300	GTATTACATTTTC
chr6	106535763	106536068	305	AGCCACTAACTTTT
chr6	106676659	106676954	295	AAAAAATAAAACTTTTTC
chr6	107710140	107711200	1060	TTTCCTCCCACTCACTCCA
chr6	108031344	108031468	124	TTACTTTACTTTAGAAGTAAT
chr6	109913228	109913274	46	GAGTTTGGCCGCACT
chr6	11444123	11444667	544	TAAACAATCAGATCTTTCGCAAGAATCTCTCTATCACGAGAACCTCAGCCTCCAAGGGGATCGGCACTAACCCCATTCATGAAGAAATCCACTCCCGGGATGATTCATTTACTGTGTCCTACCATGCCCCAAGCTACAGACTAACTAGGGCGCACTTACACAATTTGATGATGAGCTTATGCAGCACGAGGTACTAACATGAAATCCAAATTCATATCTTGATCTTCTTTATTGCGTATCATTTGTTTTTTTATTTCATTTTATTCTTCATTAATTTATCAGAT
chr6	119096307	119096767	460	TATGAAAGGGAAGGGGTGGTAGTATACTTTACAACTGCTTTGGAAGAACACGAAAAGAAAAAGAAGGGACGAGTCATACTGCTACAGGACTGTATCATTAGTAATTGGCATTGGTCTAGCGGCTGGAGATTCAGAAGAGGTATGTGGACTGATTAAGCACTCTGGAATACAAATGCTCTAT
chr6	120998162	120998472	310	CCTTTTCCATTCTT
chr6	124515712	124515837	125	TTTCCTTCTTTCTTT
chr6	131096864	131097849	985	ATCACGCGTGACTACCT
chr6	14745052	14745468	416	TGTAACTTTCTGGCAAAGTTA
chr6	154125797	154126104	307	GGCTAGACATTTTTT
chr6	156159882	156159934	52	TATATATATATATATAGTTATATATATATATA
chr6	157536809	157537120	311	CTATCTCCTCTC
chr6	159231095	159231392	297	AAAAATTACAAATTGG
chr6	160100745	160100789	44	TTTTTTTTTTTTTTTTTTTT
chr6	167658548	167658858	310	GGAATGACTCTTCT
chr6	23300149	23300458	309	GAGAAAATATTTT
chr6	25450783	25450833	50	TCCCTCCCCTCCC
chr6	25529642	25529807	165	ATAAATAAAGAATAGAGCTGCTATGAATCGAGAGCTAGATAGTCAGAACAG
chr6	2605294	2605340	46	GGAAGGAGGGAAGG
chr6	26375927	26376243	316	GAAAATTAACCTCTGAG
chr6	26401561	26401845	284	AAAAATGTGCATTG
chr6	26414699	26414986	287	TTACAGGGATGTTTTT
chr6	26423606	26424175	569	TTTTGGGTTTTTTTTTCTTTTTGAGACAGAGTCTTGCTCTGTTGTACCCTCGCTGGCACGATCTTGTCTCACTGCAACCTCTGCCTCCAGGTTGCACTTCTGAGAGTGAGAGGAGACACTGTCAATAATTGTTCCAAGACAACTGGAATAAACTGATTACCCAGAGAACTACAACATATCAAATCTTATTTCTTGATAAATATTAATCTTTACTTCATCTTTCCCAAAATGCTGATTGCAGAGAGAGTGACTTATTGTAAATAGATGGTTTTATTAAACCAAGACGAAATACAGAAGCAAAATTATATATAGTTCCTGCTAACTCCATAGAGAAAGACTACGAATTTTGCTGGGAGGTAATAGGGAAGCCTTCCA
chr6	26738916	26739328	412	ATATGTATATAATATATAATATATATATATATATATATATATATATATT
chr6	45288566	45288615	49	TATATATATATATAT
chr6	45999740	46000050	310	CTTCCTTGTGGTTTTTT
chr6	5037017	5038959	1942	TAAAATCTGCTTCAAATGTT
chr6	51652569	51652879	310	TATCTCTCTTGTTTTT
chr6	54063913	54070032	6119	TAGTATACTGGCTAAACTTAGTTTCACTTTTACAATGGTTATCTCCTTTCTAGTTCTCAAAATATTTTGAGCCTTGATTGACTGAAAATGAGATCCTTTTCATTCAGCATAGGCATGTAGTGATTTCTCCTAAAGTTTTATCCACAAAAG
chr6	57642435	57642861	426	ACTTTTAAAGTTAAGATCATTTAAATGCCATTTATTTAGTTAGAGGCACAGGTCTTTTTGTAGTACGTCGTTTAGGTGTTTGGTAGATTATGATTTATCTTATTAGTCTTATGCTTTATTATAACTTTAGTACTTGATATTATCTTCTATAACTATAC
chr6	5898218	5898753	535	ACTCGCTGTGTGATTGTCTCCACATAGATGGGTCACGCTGTGAATGTGTCCTTGCGAGTTTCACAATGTTCTGTGTACTTGTCTGTCTCGGTAGTGCGTCCTCTGCCTCT
chr6	60855340	60855656	316	ACATCACACGCTG
chr6	65550148	65552130	1982	TACTATATCTTT
chr6	66330909	66333298	2389	TAATTAATACATGCCAGATTA
chr6	66782693	66782834	141	TCAATGATATATATATATTTCTAATGATATGATATCTAGATCATT
chr6	67789710	67789919	209	TATTTTAAATATAAGATTAATATTCAACACTACTAATATAAATATTGATCAGAACATTCATATATATAATGCCCTGCCTAATATAAACATATAACTCGCTATCATAGCTGCAACATTCATATTTCATTGAAATTATTTGATTTATTTGT
chr6	71861741	71862048	307	TTAAGGTGTGTTTT
chr6	72442308	72442454	146	CATCCACAGGTGTCGTTGCTTTGAGTAAAGCACAGACACAGATGCTAGCTGCAT
chr6	75343975	75344130	155	GTCATATGAGCGCCCAGCTATGATGATGGTGTTCTTTAGCTATGTGTTTTCTTACTC
chr6	84608442	84614504	6062	AGAAATGTCAGGGGA
chr6	85062026	85062093	67	GTAGTGATTAGTATGTTACTTCT
chr6	87408479	87408590	111	GCGCACACAGATCCGGAGCGCG
chr6	94691107	94691221	114	CTCTGCACACACTGCTAAGTTGACTTGACCTCTGAACACAGCTGCTGAGACGCTCA
chr6	99586627	99587451	824	AATTGCTCACAC
chr6_GL000251v2_alt	3938106	3938149	43	ATTATAAATGAA
chr7	101357987	101360516	2529	CCAATTTTTGTATTTTT
chr7	101609568	101609793	225	TTTTCTTTTCTTTCTTCTCTGTCTCCTTCCTCTTTTTCTTCTTTCTTTCTTTCTTCTGTCTTCCTTCTCTCCTCCTCTCCTCCTCCTCCCTCCTCCTCCCTCCTCCCTCCTTTCCTTTTCTTTTCTTCTCTCTTCTCTCTCTTTTCTTTCTCTCTTCCTCCCTCCCTCCCATTCTCCTCCATTC
chr7	10162862	10163008	146	ATATAAATATATATATATATATATATATATATATATATATATATATAAATATAATATATATATTATAATATATATAAATATAAT
chr7	101690933	101691237	304	CACCTGGCTCATTTTT
chr7	102363602	102363662	60	TCATAGCCTGGAGCTTCTT
chr7	102368991	102369430	439	TGATAGATATATTATAGAATATATATATGATATATAGATATCAATATATAGCTATATACATATA
chr7	104546957	104547391	434	GCTCACATAATATGTAGTATGATCAAGTCAGAATAACACTTACAGTAACAGTCTTACTAATACAAAATTCCCACCTGTAGTCAGTACTAGTGGCAGAGAATGTGACTAGGAGTTCAGTGAAATCCTGCAGTCCAGTCGTGAAAGCAGATGTTAAAAAAAAAAAAAAAAAAGTTAGCCAATATGTAATCACATAGTAATCATCTACTTCTATGAATAATGATCATCTGTCAGAAGTTGCAGGTTTAAAACTAG
chr7	104949682	104949791	109	TGGAGAGACTTGCAGGACGACCACTGACTGTGACTCTCAAAATACTTGGGAG
chr7	10795104	10795264	160	TATATTATAGCATAACTATATACATATATATACATATATACTGATATATACACATCATCACATA
chr7	108043515	108043690	175	TACATTTCTCAATTAAATTGATATCATTGGCATTGGTACTGAGCTGTTGACTATGATT
chr7	117201965	117202262	297	CTCGAAGCTATCTT
chr7	120650198	120651335	1137	TTCTCCTGGAAATTCTC
chr7	125313297	125313565	268	GGAGAGGAGAGAGAGGAAGCGGCAGAGATATAGAGAGTCAAAGCAGAGGAGATTAGGAAGTCAAGAGAGAGACAGAGGAGACGATGACTGGAGGTCAGAGAGAGAAGTCAGAAGAAGTC
chr7	135797426	135797588	162	TTCTCTTCTTCTTCTTCTTCTTCTTCTTCCTTCTTCTTCTTTCTTTTCTTTCTTTCTTCTTTCTTCTTTCTTTCTTTCTTTCTATCTTGCATTCTACCTCTCTATCAGAATCTAC
chr7	138637488	138637531	43	ACACAATAAAAACCTACAC
chr7	14411644	14411817	173	TGTTATACAACA
chr7	150033835	150035262	1427	TGGCTCTCAGTCCCTGCCTCG
chr7	151360923	151361035	112	GCCTCTCAAAGTGCTGGGATTACAGGTGTGAG
chr7	15190096	15190442	346	TGTCAGCAAACAGTCTGTTTGCTTTTTAATAATCAGAAGAAATGCACATTTAAGGAACTACCTAGATATTTTTACTCTTACAAAAAGAATAAAAGGAAGAAGCAATATAATCAATTATAGTGCAACAGCGTTGTTTAATATAGCACAAAATGTAGGTAGAGTCTCCTTTACTCAAGAATAAGGAAGCACAAAGAGAGTAAGTAGAATCAAATACTGTCATATAAGAACTATTGATATACTTCATTAAACTTGAT
chr7	152785382	152785475	93	GAGAGAGAGAGAGAGAGAGGAGAGAGAGAGAGAGAGAGAGAG
chr7	155150224	155150536	312	AAGAAAAGTGGGTGCAA
chr7	156155660	156155699	39	ACAAGTGGGACGTCACAGGTGTGGACG
chr7	21548087	21548217	130	TTTGACCCACCAC
chr7	31550694	31552383	1689	CGTGTTTCCTTCCCATTCCACCATGACTGTAAGTTTCCTGAGGCTCCCAGCCCTGTGGAACTGTGAGTCAATTAAAACCTCTTTCCTTTATAAATTACCCAGTCTCGAGTATTTCTTCATAGCAGTGTGAGAACTCACTAATACGGGAGCCATTTAAAATATATCTCAGACCAACATCTCCAATGCTATCAAACTAATATCAGCCAGAACTCGCAGTTTCACACATATCAACAGCAAAATGCTTTCATCTGCAGTACTAA
chr7	35568398	35568431	33	ATATATATATATATATATATATA
chr7	38473424	38473745	321	AAAAGTATTCCATGAA
chr7	42565040	42565368	328	ATTATTATCTTCTT
chr7	45750947	45751375	428	CAAAAAAAAAAAAAAAAAAGAAAAGAAAAAAAAGAAAAGAAAAGAGAAAAAGAAAAAAGGAAATAATTCTAAAGAGTATGGGGAGAAATTGTCTGTGTGGGGGTGTTATTACAGAACACTTAAAACAGCCATATTTAAAAACTGACAA
chr7	52039426	52039730	304	AAAAGTAAAAGTT
chr7	53308338	53308388	50	AATCACTTCCCTG
chr7	55709826	55709907	81	TATATATATATGAGTATATATATATGAGTGTATATATATATATAT
chr7	55887641	55887837	196	GGCCTGCGGCGGCGGCGGCTGGTCAGGGGGCGGAGCTGCCGAAGCGGCCTTTGTCGTGCGGAGGTGAGTGCGCGGCGGCGGGAGGCGGCGGCGG
chr7	55887720	55887794	74	GCGGAGGCGGGAGGCGG
chr7	57064644	57064926	282	CATTATTTTTAT
chr7	57490797	57491193	396	TCATCAAATGGAATCAAATGGATTCATCATCAAATTGAATTGAATGGTATCATCAAATGGAATCATCATCGAATGGAATTCGAATGGAATTCATCAT
chr7	57509131	57509457	326	AAAACTTTATATT
chr7	57650057	57650285	228	TCATCTTTGTTGAAGACATTTGGCCAGAGCGAGATGCATCCAGGTCCCTGAGAAACAGGGGAGGCAGAGCAAGAGGGAAGACAAGAGCAGAGGCCGGAGCCCAGGCAGGGTAAAGCACCGTGCCACCGCCACGGTCATAAGGGGAGGGGTTCCAAAGGGATGG
chr7	63230795	63230890	95	AGAAAGAGAGAGAGAGGAGAGGGAG
chr7	63468534	63472497	3963	TTGCCCAGGCTGGTCTCAAACTCCTGGCCTCAATTGATCCTTCTGCTGCCTCAGCCTCCAAAGTGCTGGGATTGCAGGCTTGAGACATTGTGCCTGGCCCTTCATTGCTTTTTAATAAACTTAATTACCTTCATTTGAATACCTTTAGAACTACATTGGTTTTGTATTTCGAGGCTAAGAGTTGATTTCCATAAATAGTCATTTTGAGCCAGGTCTTTTGAATAAAGTGAGTGGTCAGAGATGATGCCACAACTTTGGCTAAAACAGTTTCCCAGAGAGCACGCTGTGAACTCTAAAATACTGTGTGCTGGTCACCATACCACAGTTCACTCTTCTTGCAAACTCAGTATTGCAAATTAATAAAACTTTTTAATTCAATTTATTTTATTTTTTTTAGAC…
chr7	63807901	63808357	456	TCACCATAATCTCATTCCAT
chr7	63817371	63817452	81	TATATATAATAAATGTATTGTATATGTATT
chr7	65032918	65034380	1462	ATAAAAATAAAA
chr7	65176446	65176742	296	CTCCCTGTGCTTTTC
chr7	67179862	67180393	531	ATATATATATATAT
chr7	67179879	67180393	514	ATATATATATATATTATATATATATATATTTTTTTTTTTT
chr7	67666810	67667160	350	GGAAACGGCAATTCAT
chr7	67928787	67928865	78	GCTTCTTAATTATTATTATTATTATTGAGACAGAGAC
chr7	68664087	68664207	120	CTGTAATCCCAGC
chr7	72631742	72632507	765	AAAAAAAATAATATATATATATAATATAT
chr7	72631757	72632491	734	ATATATATATATATAA
chr7	73012179	73012256	77	AAATAAACTATAATTATTT
chr7	74585373	74585415	42	TCCACCGGCCCG
chr7	75683885	75683964	79	CAAGCTACGCAGCTACATGAATTGAACTATGATTTA
chr7	77042769	77042821	52	ACATATATATACATATATATATATATATATATATATAT
chr7	90392838	90393142	304	AAAAGAATCTGGA
chr7	90744624	90744875	251	GCGCTGGGCTGGCCGCGGGGCTGACCCCCACCTCTCCGGACGGGGCTGAGCCCCGACCCTGCCGCGGACACG
chr7_KI270808v1_alt	150832	151311	479	CGTGTATACACGCATGCGCATACGTGTATACACGCATGCGCATACGTGTATACACGCATGCGCATACTGTATACACGCATGCGCATACGTGTATACACGCATGCGCATACGTGTATACACGCATGCGCATACGTGTATATAGGTGTGTATGTGCATACGTGTATATAGGTGTAT
chr8	106498883	106499192	309	AAAGAATTAGGAGATG
chr8	111156011	111156351	340	GGAATCTTATTTT
chr8	11218825	11218944	119	CTGCCACCACGCCCAGCTAATTTTTGTATTTTTAGTAATTTTTAGCTAATTTTTTGTATTTTTA
chr8	112213635	112213964	329	ACACTTTATTTTTT
chr8	117700566	117700883	317	TATGGAACTTTCTT
chr8	131156007	131156352	345	ACTTCTCTCGTGACCGCAAATAACAGTGCGTGTTTCGT
chr8	133312968	133313543	575	GCAACAGAGAGAGACTCTGTCTCAAAATAAAAACAACAAACAAACAAATAAATAAATAAAAGTATAAAAGCAATTTAGTAAAGTAAATCTTGTAAACAAAGAGAAAATTACCTTTTCTCTGCACACTTGAGTCTTCCAAAATTTGAAAACTATTCATAAAGTCTTCTATTCTTTATGAAAATATAGCTGTTTATGTAAGTTCAGTAAGATTCAGCTCTTTTTATAACAAGAATACAATTGAAATACTGGTTAAATACCAATGTTTGACTAAAATATCATATTTATATTGTTTATAGGTACTTACAGGTCGAAATCTGCCTTGTTTGGCTTCCTAGGGACAAAAAGAT
chr8	133312974	133313544	570	AGAGAGAGAGACTCTGTCTCAAAATAAACAAACAACAAACAAACAAATAAATAAATAAAAGAGTATAAAAGCAATTTAGTAAGTATATCTTTGTAAACAAAAGAGAACATTTACCTTTTCTCTGCACACTTGAGTCTTCCAAAATTGAAAACTATTCATAAGTCTTCTCATTCTTTATGAAAATATATAGCTGTTTATGTAAGTTCAGTAAGATTCAGCTCTTTTTATAAACAAGATACAATTGAAAATACTGGTTAAATTACCAATGTTTGACTAAAATATCATATTTATATTGTTTATAGGTACTACAGGTCGAAATCTGCCTTGGTTTGGCTTCCTAGGGACAAAAAGAT
chr8	136147946	136151658	3712	ATAACCTCTGAC
chr8	13701055	13701130	75	GCTCTCTTTTGGATT
chr8	13969776	13969858	82	GCTGCAGGGCGAGGCAGTAG
chr8	144023366	144023828	462	ATGACCCACTCTCTCCCTGTAGAACCTC
chr8	144831653	144832449	796	GCTGGGTGTGGTGGC
chr8	18678984	18679028	44	GACATTTGCAATATATATA
chr8	29310456	29310575	119	GGGAAAGACACAGAAAGTAAAGACAGAAGAGAAGTAGAAAGAAA
chr8	30950991	30951277	286	TCCTCCCTCCCTCTCCTCCCTCTCCCTCCCTCCCTC
chr8	31713741	31714080	339	TTCTCTGTTTCTTT
chr8	3190241	3190333	92	CACAACTATCGCGCATATGAGTATAGG
chr8	32806531	32806597	66	TTATATACACACA
chr8	40028168	40033337	5169	GACCATGCTGGTCAG
chr8	40118538	40118640	102	CCGTGATCGTGACCAGTCTAA
chr8	46469700	46470020	320	CTTTCTAGCTTTT
chr8	55488659	55488960	301	AAAAAGACCAATGGT
chr8	56054715	56054920	205	ATTTAGTTATTAACACACATTACTGCAAAGCATAACAGATTTTTTTTTATTAAGCACGTCCCACGTATATCTGTCACAAGCTGTCACCACAGGCATTGTCAGTCTACCAGGTTAG
chr8	57382462	57382737	275	ATAATATACATATATTATAATATATAATTAGTATATTATAATATAATGTAATATTATTATATTATAATGTAATATATAATGTAATAATATAATATATTATATATATTATATAATAATATATTATATAATAATATATATATAATAATATATAATATAATGTATTATATATTATATAATAATATATTATGTAATAAT
chr8	61033296	61033467	171	CTAAGCTGTGTCTCTGGAAGGCAGCTGCTGTCGGAGCGATGACAGTCAGCTGCTGAGAATGGTTCTCGCGTCCAGCTG
chr8	6730324	6730631	307	ATCATAGTACTTTT
chr8	6933351	6933673	322	AGCTGCTTAGGAAAAACAGTGC
chr8	7183162	7183326	164	TTCTTTTCTCTCTGGATAGATCATACTGAGCAATGGGATTGTCTATGATCAAATGGTGATGATATGTGTT
chr8	8215605	8215671	66	GAGTGAGATTGTGCCTGCTCAACTAAGTAAATA
chr8	8528545	8529438	893	GGATTACAGGTGTGAGCCACC
chr8	94340909	94340965	56	GCCAGCCGCCCGTCCGGGAGGTGGGGG
chr9	102400201	102400477	276	GCTGGGCCTTCTGTTTATAAAACCAAGAGGAATCTGCACAGTGCAGTAGTTTATATGTCTCATCACCCCATCACAAATGATGATTGATCGTATACAGTGCATATATCACATAAAGGGATCAGATATGATAGCATCTGAT
chr9	107271175	107273166	1991	ATTATTATTATT
chr9	107775256	107778316	3060	TAAAAATATTTTGTA
chr9	112140081	112140378	297	AAAAAAATACAAAAATTG
chr9	112517132	112517178	46	TTAGGCTAAACT
chr9	119594819	119595036	217	TGAGATGGGGTTTCACTGTACTGGTAAGGCT
chr9	128464680	128464863	183	TTTTTGTATTTTT
chr9	129264423	129265792	1369	GCTGGGATTACAGGT
chr9	129389406	129389433	27	TTTTTTTTAATT
chr9	129390008	129390224	216	GAACCTCAACCTAAACCTTA
chr9	134798566	134798657	91	CCTGGGAAGAGCA
chr9	14632543	14632697	154	ACAATATAATATATATTATATAATATATTCAGATATATTA
chr9	14998227	14998459	232	AAGAACTTGTCTT
chr9	15394900	15395200	300	AAAAAAATACATATAT
chr9	15602586	15602682	96	TTTTGATAACAGAA
chr9	22999506	22999822	316	AAAAAATTTGAATGCC
chr9	26512874	26513318	444	GTTGAGCATGATATTCAATGCGGTTTGTTAGCATTCATTTTTAACAGTCTCTGCAGTAGTGCAGTGCATCTGGTTGGTTGCTTTCAGATCTTGCAGTCAAAGCTGTATTCAGCATACGCTATTGATTATAAAGATTTCATTACATTCGATCTCGACTCGTGATCGCGCGGAAATTGTGTTAGCTGCACTCGCTCTATTTTTTATTTCTTTACCTTTTGTTGCTCCTTTTCTTTCT
chr9	38513828	38514261	433	ACACCATTGTGTGCAAAATGAAATAATAGAATAGCGTCGAACAGTAAGTAAAAAACATCTTTGGGATAAATTTAACAAAATAACATGCAAAATCATCATCACTGACAACTGAAAACTAACAAACCACAATTCATTTCAGATAAAGACAACAAAATGCTGCTGGTG
chr9	39012504	39012768	264	AAAAAATTAAAAATA
chr9	39266799	39266822	23	AATTATAATTAT
chr9	39409426	39410059	633	CATTTTGGTAAAGGCATTGTTCCTAA
chr9	40025369	40025677	308	TTACATTTCATTTTCTT
chr9	40059005	40059370	365	AAAAAATCTAAACAGCATCTAATTAAATCATCAAAGACTATCTACTAATTGTGTGCATAGAGCAGATGTACAGTCAGACACACAGCACTTATCTATATTGATTACATC
chr9	40649786	40649862	76	AAAAAGCCGCGGCGGCGGGGGGCAAAAAGCCG
chr9	40923209	40924336	1127	GGATTCCAGAACACTCCTGC
chr9	41231751	41231857	106	CGTTCTCAGTATAACAGTCACTTCTCCTCCACATACACTGTCCGAACGTCTTACCGTCACATTCACT
chr9	47270	48891	1621	GAGAGTCTCTCATCT
chr9	60581425	60581611	186	AATTTGAGGACATACAGC
chr9	60581490	60581611	121	CACAAAGAAGTTTCTGAGAATGCTTCTGTCTAGATTTTATATGAAGATAT
chr9	60593726	60593910	184	GATTTAATATGAAGATAAC
chr9	60600968	60601457	489	AGAGTGTTTCAAACCTGCTCTAT
chr9	60603610	60603731	121	CACAAAGAAGTTTCTGAGAATGCTTCTGTCTAGATTTTATATGAAGATAT
chr9	60617742	60618009	267	ATCTATTCTAAATATCAACTTGCAGATTCTACTAAAAGGAATGTTTCCAAAATGCTGTATCCAAGCAATGCGTTCAACTCTGTTAATTTGAGGACATACAGC
chr9	60659026	60659221	195	TGCTGTCTGCTTTTTATAATGTAA
chr9	60672297	60672435	138	CACAAAGAAGTTTCTGAGAATGCTTCTGTCTAG
chr9	60672297	60672482	185	GATTTAATATGAAGATAAC
chr9	61850702	61852517	1815	AATATATTAATAGA
chr9	61887085	61887401	316	CAAATAAAGACTTTTTT
chr9	62838389	62838481	92	CTAGGCGCCTCTCTGCGCCTTTGCGAGGCCAG
chr9	62865062	62865241	179	ATATATTATATATATGTATTCTATATATATACACATATATATGTATATATATATATACGAACTGGAAGTAGAAAGACTCACTACATAATATAATTGCAACGAAGTAGACAGACTCCTAATGCGAGACAT
chr9	63781626	63781702	76	CGCAGAGAGGCGCCTAGCGCCGGCGC
chr9	64497616	64497708	92	CTCTGTACTGAGACATTCAGAGAGTTC
chr9	65385470	65385516	46	CGCGGCGCGCAGCGATATT
chr9	65688182	65688293	111	TATTTGTTATATATAGGTCTCTAATGTTT
chr9	66317270	66317641	371	GATGTAATCAATATAGATAAGTGCTGTGTGTCTGACTGTACATCTGCTCTATGCACACAATTAGTAGATAGTCTTTGATGATTTAATTAGATGCTGTTTAGATTTTTT
chr9	66826607	66826903	296	GCTTGCATGGTTTTTTT
chr9	66938028	66938665	637	GGAACAATGCCTTTACCAAAATG
chr9	67643775	67643811	36	CTTCTTTCTTTCTTTC
chr9	67693449	67693748	299	AAAAAAGTCTTTATTTG
chr9	67775323	67775710	387	TAATGATGTGACTATAAGATTTAGATTTGACTGACTCAAGTATATATTATTCTACACTTCTTATTAATTATTTTGCTTTTTTTTTTTTTGACAGTCTGCTCTGTCGCAGCGACTGCGACTGCAGAGGAATCTCGTCACTGCAGTCGCTTCGTTAGCATTCTCTGCGCACACGCTATTTTTTTATTTTAGTAAAGGTTACTTGTTACAGATTCTCGATTCTTATATACACGCTGTCAAATGCTGATTACAGCTGAACGCATTTTTAT
chr9	86539644	86541039	1395	TTATTGTGGGCCATGCCTTTTGATCATATATTAGCTAGCAAGAGCTCCAGGTTTCCTCTCCATAATGAAAATTTTTGAGCCTAACAATAGTCACAATTGGCGC
chr9	87853650	87853729	79	CAGCTCTCTCCAGTCCTCTAGGTCCTCCACTATAT
chr9	88244083	88246050	1967	TTATGTACCTTTT
chr9	94374485	94374588	103	GTGGGGCCTCCAACCGTGCACGCCGCGCCGCCTGACGCCGCGGTAACTGCGACAGTGCGCGGTCTGCG
chr9	94530642	94530951	309	CCAAACACCATGTTTT
chr9	94530642	94530951	309	CCAAACACCATGTTTT
chrUn_GL000216v2	103179	103266	87	TGTATTTTAAAAATCCAGCTAAGGCAGG
chrUn_GL000216v2	103185	103242	57	TTTATAAAATATCTG
chrUn_GL000216v2	146016	146060	44	TGTCACAATGTCCATGTAGGCAGA
chrUn_GL000216v2	151230	151415	185	CACCTGGGTGATCAGTGCA
chrUn_KI270442v1	19325	22296	2971	AGTGCGATTGGATTGGACTGGATTGGAGTGGAATTCAGTGGAGGGAATGGAGTGGTATGGAATGGAATGCAAATGGAATGGAATGGAATGGACTCGATTTGAATGGATTGGAATGGAAAGGAATGGAATGGACTCGAATGGAATGAGAATGTACTCGAATGGAATGGAATGGAAAGGAATGGAATGGAATTGGAATGGCGAATGGAATGCAATAGAATCGAATGGAATGGAATGGAAATGAATGGAGTGGAATCCAATGGAATGGAATACAAAGGAATTAATCTAATTGCAAGGAATGTGCTGAAGTGGAGTTCAGTGGAACTCAATGCAGTGAATTGAATGGTTAGTAATGGACTTGAGTGTAGTGGAGTGGAATGGAAATGAATGGAATGGAATGGA…
chrUn_KI270519v1	51796	51999	203	TTTTTGTTTTGTATCTTTGTAGTGCA
chrUn_KI270519v1	63450	63654	204	GAAGCATTCAGACAAACTTCTTTGGATGGGTACATTCATCACACAGAGTTTAACCTTTCTTTTGATTGAGCAATTTTGAAAGACTCTTTTTGTAGAATATGGAAATGGATA
chrUn_KI270742v1	135405	135489	84	GTTCATCAGCCTACAA
chrUn_KI270757v1	60793	61470	677	AATGTCCACATCACAAAGAAGTTTCTCAGAATGCTTCTGTGTGATTTTTATGGGATGATATTTCCTTTTCCAACATGAGCCACAAAGGGCTCCAAATGTCCACTTGCAGATTCTACATAAAGGGAATATCAAAACTGCTCAATAAAAGAAAGGTTCAACTCTGTGAGATGAATGCACACATAACAGAGAAGTTTCTGAGAATGCATCCTGTGTATTTTTATGGGAAGATATCTCCTTTTCCACCATCGGCTACTTATGGCTCAAAGTATCCACTTTGAGATTCTATGAAAAGAGTGTTTCAAAACATTTCAATCTAATGCAATATTCAAAAC
chrUn_KN707896v1_decoy	11198	11308	110	TTCCTGCATTCCATTTCCATTCCATTCATTCC
chrUn_KN707896v1_decoy	12642	12820	178	ACTCACTCCATGCCATTCCACTCGGGTTTATTCCATTCCTTTCATTCCATTCGGGTGAATCCATTCCATTCCATTCCATTCCATTCGATTCCATTATATTGCACTCGGGTTGATTCCTTTGCATTCCATTCATTAC
chrUn_KN707896v1_decoy	13164	13483	319	CTATTCGGGTTAATTCCCTTCCATTCTATTCCATTCCATTCCATTCCATTCCATTGCAATCGAATTGATTCCATTCCATTCCATTCCATTCCTTTTCCAGTCAATTTCGTTCCAATCCATTCCGTTCTGTACCATTCATTCCATTCCTTTCCATTCCATTCCAATGCCATTCCACTCGGGTTTGATTCCATTCCTTTCCATTACATTGGTGTTGAAACCATTCCATTCCTTTCCATTCCTTTCGTTCCAATTCCATTACACTCGGTGTTGATTCC
chrUn_KN707896v1_decoy	16079	16221	142	ACTCGGGTTGATTCCATTGCTTTTCCATTCCATTTG
chrUn_KN707896v1_decoy	17130	17631	501	CTATCCGTGGTTAATTCCATTCCATTCGTATTCCATTGCATTCCATTCCATTCCATTGGCAATCGAGTTGATTCCATTCCATTCCATTCCTATTCCATTTCCATTCCATTCATATTTCGTTCCAATCCATTCCGTTCTGTACCAT
chrUn_KN707896v1_decoy	17574	17631	57	TTCCATTCCATTCCATTC
chrUn_KN707896v1_decoy	20199	20462	263	CGTTTGCATTCCATTCGACTTGAACCCATTCCATTCCATTCCATTCCATTCCAATCCATTGCACACGGGTCCATTCCATTCCTTCCATTTCCTTCCATTCCTTTCCATTTCTTTCCATTCCATTCTATTCCGTAC
chrUn_KN707896v1_decoy	20590	20889	299	ATTCCATTTCGTTCCAATCCATTTCCGTTCTGTACCATTCCATTCCATTCCTTTCCATTCCATTCCATGCCAATTCCACTCGGTTTAATTCCATTCCTTTCCATTCCATTGGGTTTGAATCCA
chrUn_KN707896v1_decoy	24365	24443	78	ATTCCATTCCATTCCATTCCAT
chrUn_KN707896v1_decoy	30847	31105	258	CATTCACATTCCATTCCATTGCATTCCATTCCATTCCATTCCCTGCACTCAGATTGATTCCATTCCATCCCATTCCATCCATTCCGTTCCATTCCATTCCATTCCATTCTATTCGCGTTAATTCGCATTCCATTCCCATTTACATTCCATTGCAATCGAGTTGATTCCATTCTCCATTCCGTTCCATTCCATTCCATTCCATTCCATTTCGTTCCATTCCTTCTATTCCGTACCA
chrUn_KN707896v1_decoy	32467	32528	61	ATTCCATTGCATTC
chrUn_KN707896v1_decoy	6191	6470	279	CATTGCAATCGAGGTTGATTCCATTCGAGTTGAATACATTCCATTTCCATTCAATTCCATTCCATTCCATCACCGGATTCATTCCATTCCATTCCATTTAAATTCCATTCCATTCCATTTCATTCCATTCCATTCTATTCCGTACCATTCCATTCCATCCCATTCCATTCCATTCCATTCCATTCCATGCATTACACTCGGGTTGATTCCATTCCTTTCCATTCCATTCTTGTTGAATCCATTCTA
chrUn_KN707896v1_decoy	9061	9478	417	TTCGATTCGCATTCGATTGCACTCGGTTGATTCCATTCCACTCGATTCCCTGCCATTCCATTCCATTCCATTCCATTTCTATTCCATTCCATTCCATTCCTTTGCATTCCATTCACAATGGGTTGATTCCATTCCATTCCTTTCCATTCCATTCCATTCCCTTGCATTCCACTCTCGGTTGATTCCATTCTTTCCTTCCACTCCATTACATTTCCTTCCATTCCACTCGGAATGATTGATTCCATTCCATTCCATTCCCTTTTCATTACATTTGCA
chrUn_KN707896v1_decoy	9548	9689	141	CGTTTCGGATGATTCCATTTCCATTCCATTCCATTCCATTCCATTCCCCTTGCAGTCGGGTTGATT
chrUn_KN707963v1_decoy	57530	57788	258	TACAACTCTTCTGTATGCTCTGCCTACAAGGGGCATTGTGACATATCTCTGCACTGATCACCCAGGTGATGTAACAATTTTTGGATTTGTCTACCAGGGCTTTGTGACTTATGTTTGCACTGATCACCCAGGAGATGTAACTCTTGTTTTGGCTCTGACTACAGGGTTACTTTGACGTGTCACTGCACT
chrUn_KN707967v1_decoy	7956	8245	289	AAGCCCCCTGTAGACAAATCACAGAAAATTGTTACATCACCTGGGTGATCAGTGGAGATATCTGTCACAATTCTCCCTTTAAGCGCAGCTTAGAAAAGCGTTACATCACATGAGTGATCAGTGCAGAGATTATGTCACTATTCCCCTGTAAGGAA
chrUn_KN707971v1_decoy	7983	8200	217	GAATATTATCTGGCTCTGCTATAGGGCGTTTTGACATAGTTCTGCAAAGATCACCTAGGTATGTAACTCTTTTCCACCTCTGCCTACAGGGGGCATGTGAATATCTTGCCTGATCACCCAGGTGATGGAGTCTTGTT
chrX	101836462	101836592	130	TTTATTAATCAGAAAATGTAATCCAAGTCGATAGTTGTCACACACTCTTAGAACATCACTAGGCTCT
chrX	109109987	109114182	4195	TAGTATAGAAACTACTTTTGGTCAAGATGGATTA
chrX	113633744	113634061	317	AAAAGTAAACTTCA
chrX	117476754	117476792	38	ATATATATATATGCATATATATAT
chrX	136023181	136023209	28	TATATATATATATATA
chrX	139859821	139860128	307	GAAAAGAAAGTGCTT
chrX	152748956	152749447	491	TGCTCGCCCTGCCGGGCGGGCCAGCGAAAGCACTGAGGCCAGCGGGCTTCGTGGCGGACCACCCTTACCTGCCGCAAATCAAATTCCAGCCTTATCAGTCTTGCCAGGAGTGACAGCAGCTTCATGGCAGATGATGCATCCAGCTCACAGCGAGATCCGTCTCAGCACCTGGCATGGCTCTGGGTCTTCCTGGAATTCAGCTATGCTCAGAAACCTTGCGAGATGGGTGTCATCAGCAGATGCGTCAACAGCATTGAACACAGA
chrX	1791944	1792838	894	AATATTTGCAAGATGTAGTAGAAAAGAATGTAGAGAGATGAGAAAAACACGCTAATCGTCTCACAGAGACAATGCGAGTTCTCATTATGATAAATAAATAAGCACACAGAGAACTATAGACTCGTACTTGCCTGCTGGTGCAAGTATGGACCAAGTTACGTTGTAGAGAGGAGCGCTGCTTGAACTGAGTGGTAGATTGTGAAGAGGAAGGCTTCATGAGTACCTTGGGAGTCTCTGAAAAAATAGTGAGAGATGTAATAGGCAGCAAGAAAACACAGTTATTTTGCACACAGCTGAGTAATTATTATTTGAGCGAGGAGGCACTTCTCGGAAATGCCAGTTGAAGGCCGAGTTTGTGAGACGCCAGGTACTGGCTGGATAAAGCACAGCAGTCATTGC…
chrX	2165824	2165931	107	TTATACACACACACACACACACACACATATATACACACACATAACATATATATACACACTATATGTAATATATACA
chrX	23600186	23600269	83	TATACTTCAGAA
chrX	29335262	29335334	72	AGGGGGAGGGGGAGGGG
chrX	29336293	29336342	49	TATATTATATATGCACCGTTTGGG
chrX	3116340	3116568	228	ACACATGTAACCATAGTAACACAAACACCTACCGTTCCGC
chrX	31528157	31528256	99	TAGTAAAGGATGC
chrX	31559230	31559662	432	GTGCTGATCTGTGATTCTATATTCTCTAGTAGTATTCTAATTCTTCATGTCTCATCTATTCCTTATTTCATCTAGTTCTCAACTCATGCTGCGCTTGCTGCTCAGTGTATTCCTATTCCATTCATCTAGCTATCTGCTACATTGCCTCTTACTCAAATTCCTTGCATCTTAGTCATCCACTACCTCTACTTCATTTCAATCCTCTACTCCACTCACAGACAACTCCA
chrX	48303189	48303801	612	GAGCTATTGCACAGCCAGCCTGGGCGATGAAGAGTGAAAACTGCAACTTAAAAAAAAAAAAAAAAAAAAGGTCTTTCCCAGGTAGCTGAGTCTGAGCTGAAAAGCAGTTGGGCCTTGACGGAGCTCTTTACAGCCCCTTCCTATCTACTTGCCCTGATTCCCATGTGTTACGGTCATTATCAGAATCATTCCCCTGGAAGTCTGCAGCCCGTTTATTACGCATGAAAGGTGAGAGGTGTGACGTTGAAACTACTAGAAAGAAAGAAAATGTTTATTCCTTAAGAGGCAAGCTTAGGCCTGGCACATTGGCTCATTTCTGTAGTACCAGCACTTTGGCACGCTGAGGATGGAGGAAAACTTGAGGCCAGGAGCTCAAGAGGAGCCTGTGCAACATAGAGA…
chrX	52718424	52718514	90	GAAGTGAGTCATTCT
chrX	52739915	52740005	90	AGAATGACTCACTTC
chrX	58494034	58494367	333	AACTTTCTTTTGATGGAGAAGTTCCAAAAGAGTCTTTTTGAAGTATCTGCAGAGGGATATTTGTGTCGCGGTTTAAGGCATATGATGAAAAAGCAAATATCTTCACATAAATACTAGACAGAAGCATTCTTCGAAACTTCTTTATAATGTGTTGGTTCATCTCAGACATTTGAATCCT
chrX	76034037	76034333	296	AAATGTCTTCTTTT
chrX	7844433	7844595	162	GAGGGAGGAGGAGGAAGAGTGTGTGGTGTGTGGAAGGAG
chrX	79334924	79335011	87	GTTTGATCTGTCGTTTTAGATGCTTCTTGCTG
chrX	85088819	85088868	49	CTACTTAGTTTACTT
chrX	93356671	93356699	28	ATATATATATATAT
chrX	93356671	93356701	30	ATATATATATATAT
chrX	938622	938984	362	AGATGAGATGTGAGTGGTGGTGTCCCAATGCCAAAAGAAGTTGTGTCCTCATCCTCTCTGAATATTGGACAGAAATCTCTTCTCTGTCTCTCTCTCTCTCTCTTCTACTCTCCTCTCTTTCTCTTCGTTCTTCCATCTCTCTCTCTCTT
chrY	11330128	11330590	462	TTGCAGTGATATGTCACAATGCCCCCATAGGCAAATCCAAGACAACCGTCCGT
chrY	11330166	11330741	575	AACTAGAGTTACATCACCACGGTGATGA
chrY	11843124	11843168	44	TGTGTGTGTGTGT
chrY	11980381	11980905	524	CGTCCAGCCTCAGCCTCCTGAGTAGCTGGGACTACAGGTGTGCACACATGAGGCACGGCTTGTTATTATTATTATTATTATATAACTTTTTGTAGAGATGGGTTCTGCTGTGTTCCCAAGGATGATCTCGAACACTTCACCTCAAGCAATCTTCCCGCCCTGACCTCCCAAAGTGCTGGATGACAGGCTTGAGCTCCTGTGCCTGGCCCGGTGTGTGATTTATTATTTATTTATTTATTTATTTATTTATTTATTTATTTATTTTTGAGACGGAATCTCGCTCTGTGGCCCAGGCTGGAGTGCAGTGGCACTATCTCTGGCTCACTGCAAGCTCCGCCTCCCGGGTTCACGCCATTCTCCTGCCTCAGCCTCCCGTGTAGCTGGGACTACAGGCGCCCG…
chrY	12497398	12499542	2144	CTCCATGCCTGGATCAGACCAGAATCCAGCCACATGCAGATTCCAGATCAGCCCAGAATCTGATT
chrY	12500567	12500690	123	AGATAGATAGATAAATAGATAGATA
chrY	25448005	25448906	901	AACCGAAAAAAGTGAATT
chrY	26549620	26550886	1266	CCTGAAGTATATAAAACTATTTATCCTTGCCTCCCCCACTATGCAGATTCAGAGTGTTCATCTTTTGACTTATTATTTCCTCTTAACAAGAGATAGCCAGTTTAATAAAATGGATGACTTTGATACCTTCATTTTATTTTTCTCAATATTAAGCCAGTAAACATTGCTCTGAGGGTACCATACTAATCAGTTTTAAAATTTTGTGTCATTTTTGTTGTTGCACAGAGATATATACGTATGTGTGTGTATGTTTTCAGAAAGATGTATTTACTGAAAGTTGGATTCATATAGTGTATTGATTGTATTTTAAATTATAACTACTATTTGTTTTTCATTTTAAAGGTATACATATATACATACATATAATATACTATATATATATATATTTATATATATAGA…
chrY	3772614	3772853	239	TTCTCTTTTTTTTCTTCTCTTCCTTCTTCTCCTTTCCTCCTTCCTTCCTTCTCTT
chrY	5541708	5541743	35	TCTTTCTTTCTTTCTTT
chrY	56844184	56844295	111	GATGGAGATATTGTGAGATATCCTGTGCACTGATACACGCCAGGGATGATGTAATATT
chrY	56858332	56858550	218	AGAAAGATTAAGAAAGTATTA
chrY	56858350	56858519	169	AAAGAAAGAAAGAAGAAAGAAAGAAAG
chrY	56858352	56858511	159	AAAGAAAGAAGAAAGAAAGAAAGAAAGAA
chrY	7298538	7298615	77	GCACCACCTTCAGGATGACCTCACTCTTAATATATACCTTTTTTTTA
chrY	7363455	7365281	1826	TCTCTCTCTTTTTTTTTTTTTTTTTTTGAGACACAGCAAGGCGGAGGTTGCAGTGAGCCAAGATGGCGCCATGCCTCCAGCCTGGATGATGGAGTGAAACTCTGTCCATTGCCCCGCCCCCCCAAAAAGAACATAGAGT
